# Supplementary material for: Highly Regio- and Stereoselective Diels-Alder Cycloadditions via Two-Step and Multicomponent Reactions Promoted by Infrared Irradiation under Solvent-Free Conditions
Source: PubMed Central journal article supplement (PMC3317676; doi:10.3390/ijms13032590), 2012-02-24
Supplement: ijms-13-02590-s001.pdf [file ijms-13-02590-s001.pdf]

## Supporting Information

### Highly Regio- and Stereoselective Diels-Alder Cycloadditions via Two-step and Multicomponent Reactions Promoted by Infrared Irradiation Under Solvent-free Conditions.

María Inés Flores-Conde,<sup>1</sup> Leonor Reyes,<sup>1</sup> Rafael Herrera,<sup>2</sup> Hulme Rios,<sup>3</sup> Miguel A. Vázquez,<sup>4</sup> \* René Miranda,<sup>3</sup> Joaquín Tamariz,<sup>1</sup> Francisco Delgado.<sup>1\*</sup>

<sup>1</sup> Departamento de Química Orgánica, Escuela Nacional de Ciencias Biológicas-IPN, Prol. Carpio y Plan de Ayala, 11340 Mexico, D. F., Mexico. <sup>2</sup> Instituto de Investigaciones Químico-biológicas, Universidad Michoacana de San Nicolás de Hidalgo, Edif. B-1, Ciudad Universitaria, Francisco J. Mújica S/N, 58066 Morelia, Mich., Mexico. <sup>3</sup> Departamento de Ciencias Químicas, Facultad de Estudios Superiores Cuautitlan-UNAM, Campo 1, Avenida 1ro. de Mayo s/n, Cuautitlan Izcalli, Estado de Mexico 54740, Mexico. <sup>4</sup> Facultad de Química, Universidad de Guanajuato, Noria Alta, s/n, Guanajuato Gto. 36050, Mexico.

[fdelgado@woodward.enqb.ipn.mx](mailto:fdelgado@woodward.enqb.ipn.mx)

#### Contents

#### page

IR, HRMS, <sup>1</sup>H, <sup>13</sup>C NMR and other NMR data

S1-S25, S29-S67, S71-S172.

Figures (X-ray)

S26-S28, S68-S70, S173-S175.

Theoretical Calculations

S176-S209.

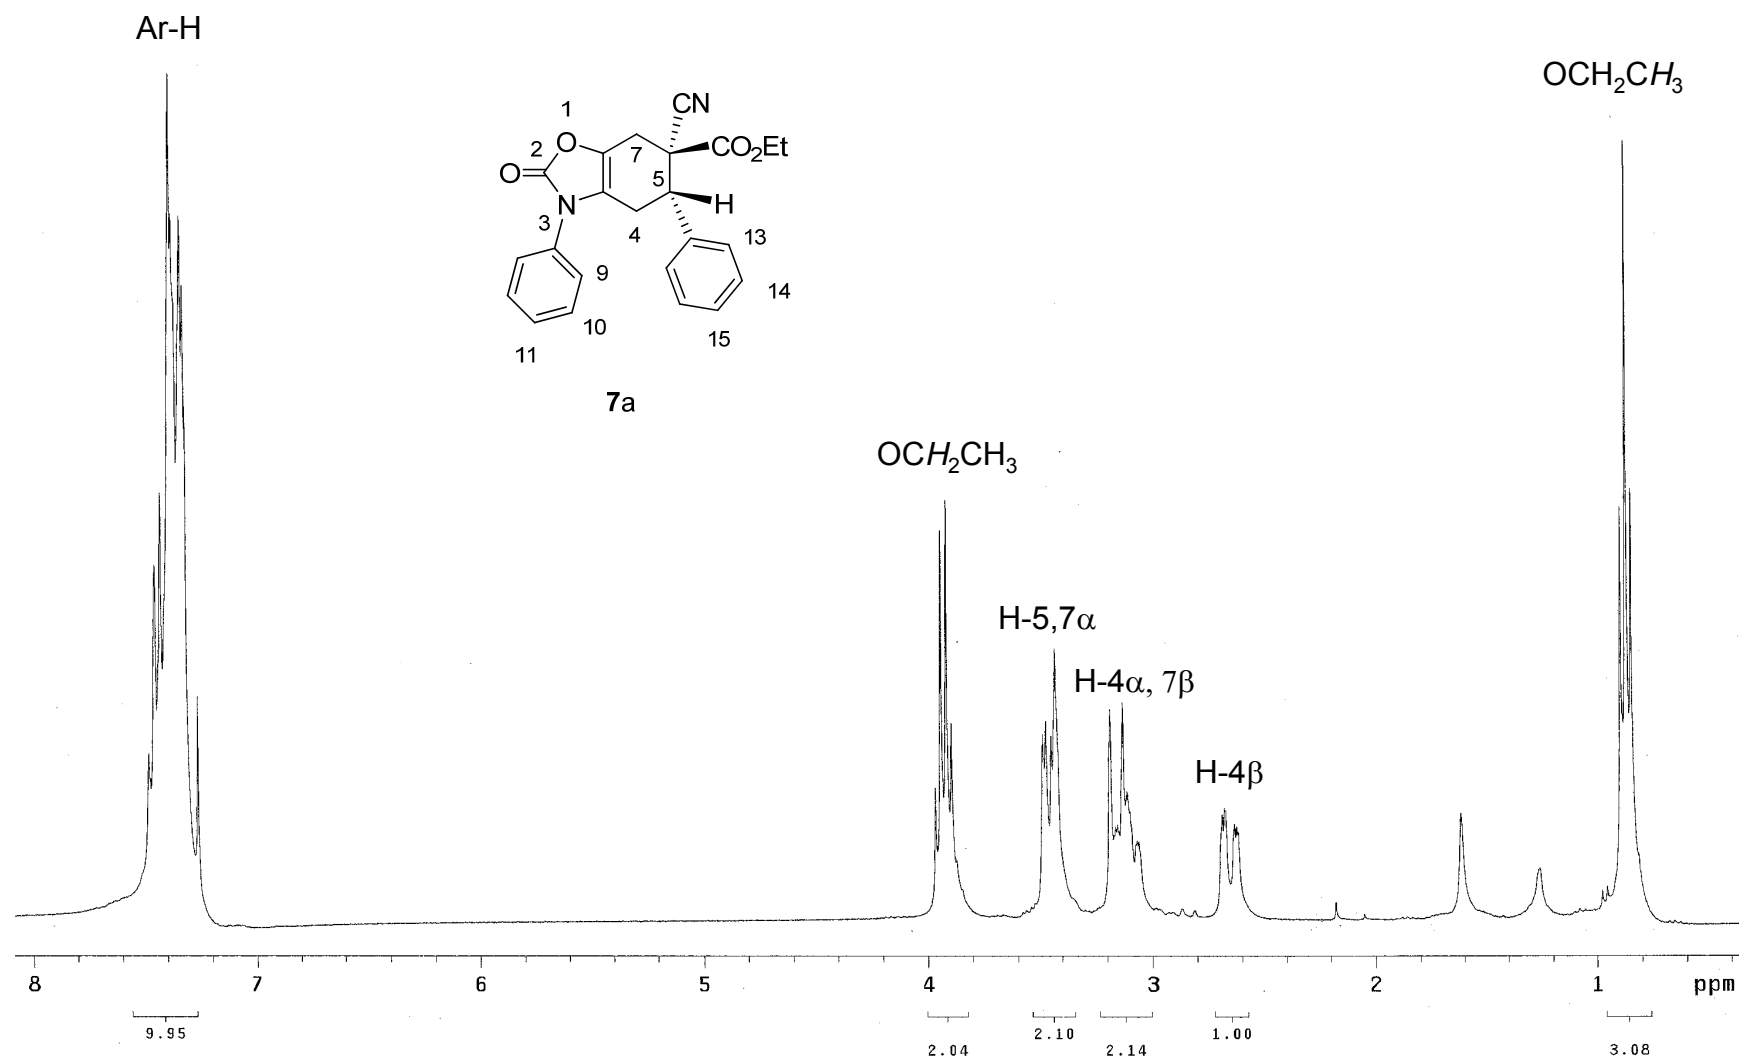

<sup>1</sup>H NMR (CDCl<sub>3</sub>) **7a**

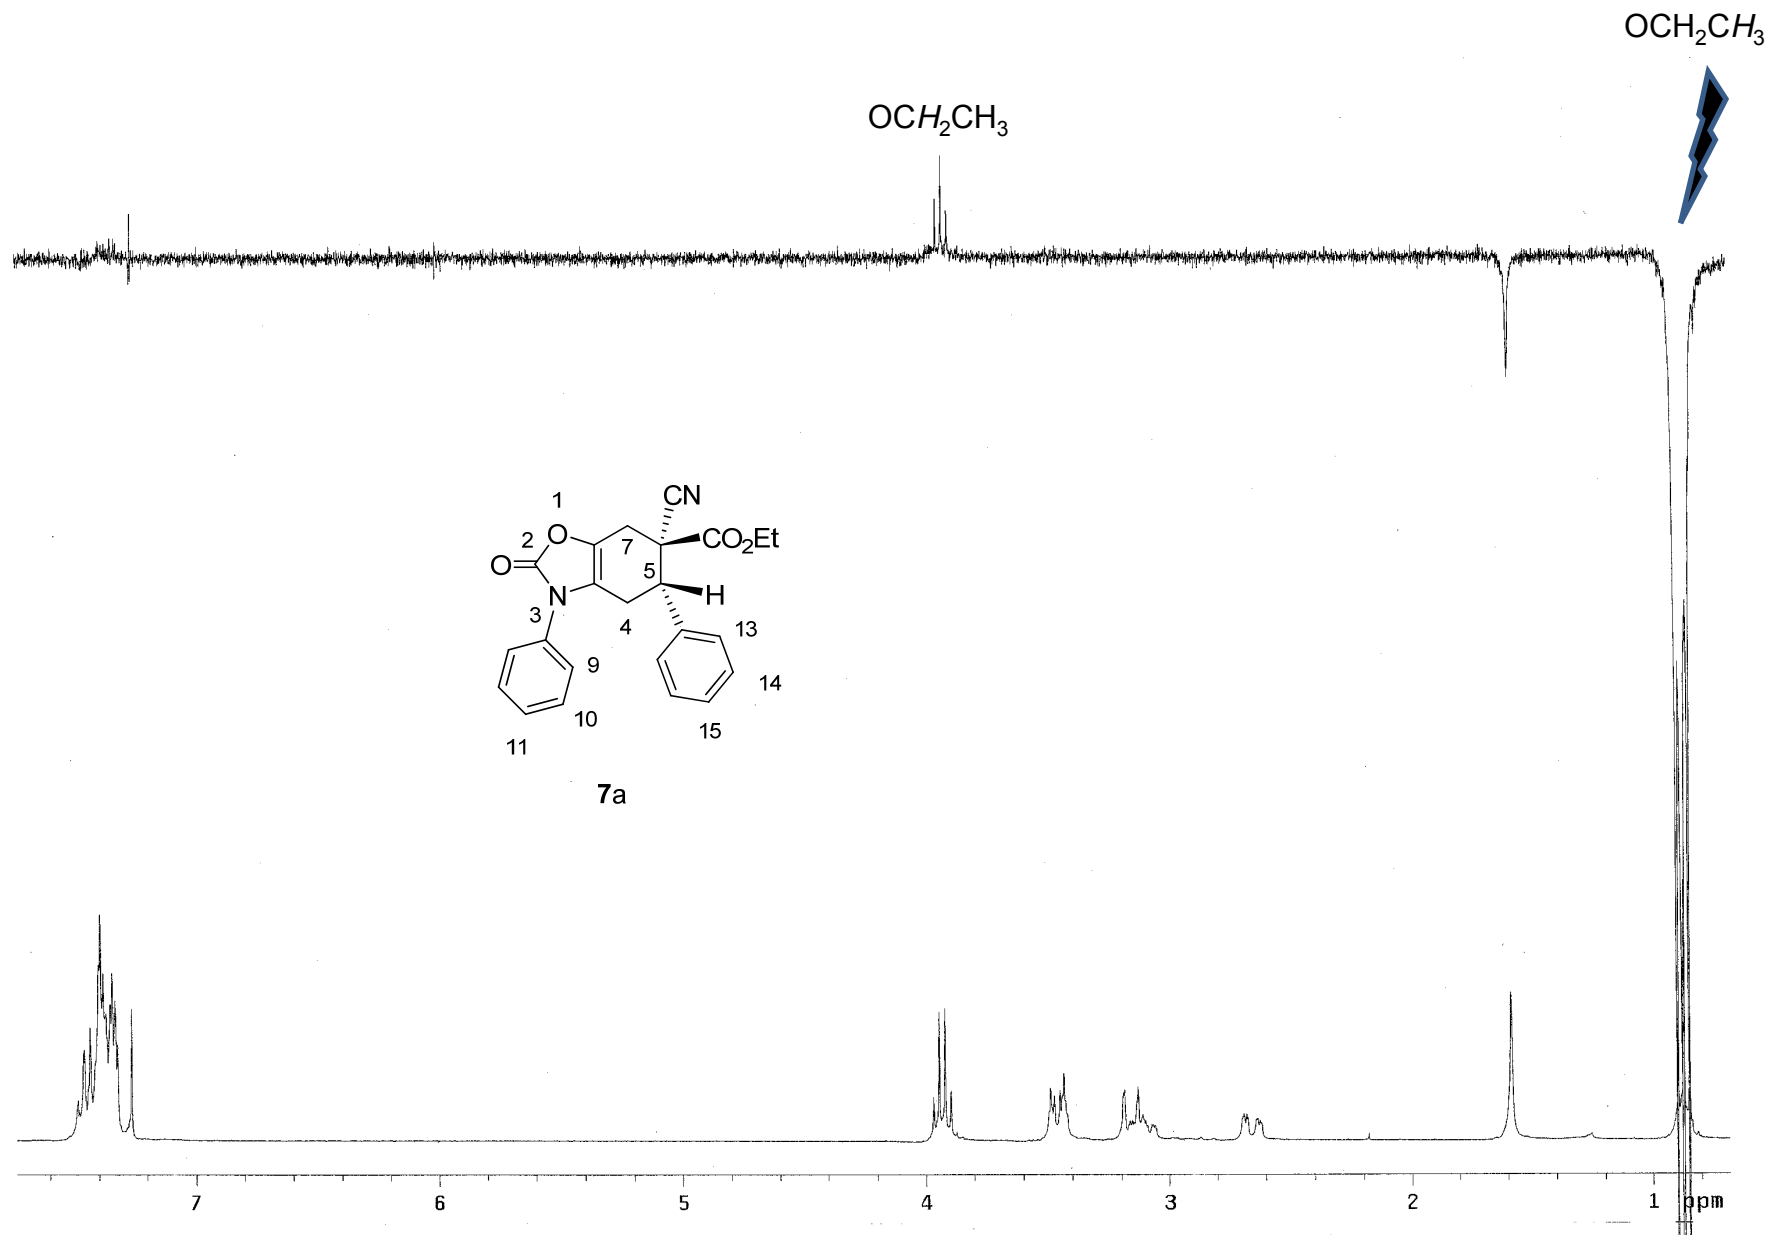

NOE experiment ( $\text{CDCl}_3$ ) **7a**

**S2**

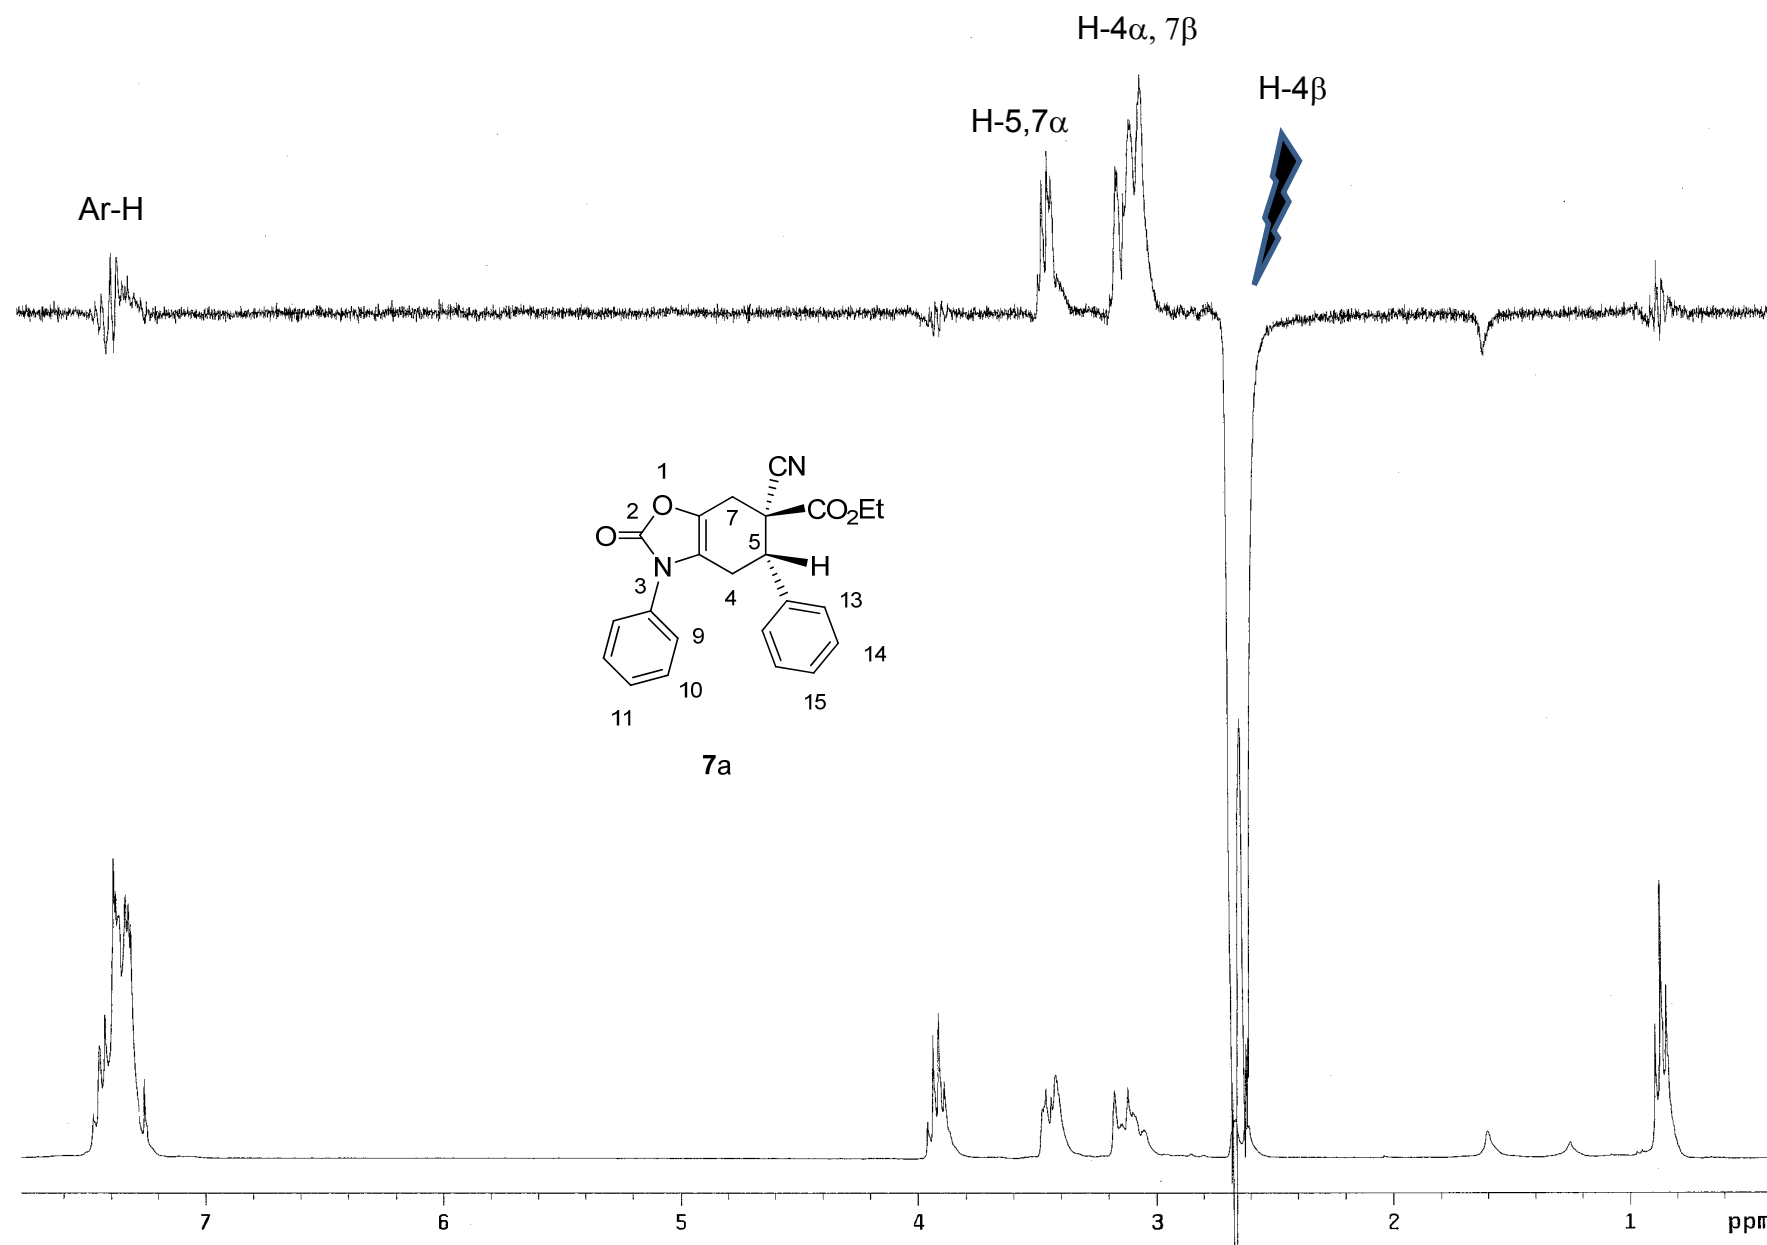NOE experiment (CDCl<sub>3</sub>) 7a

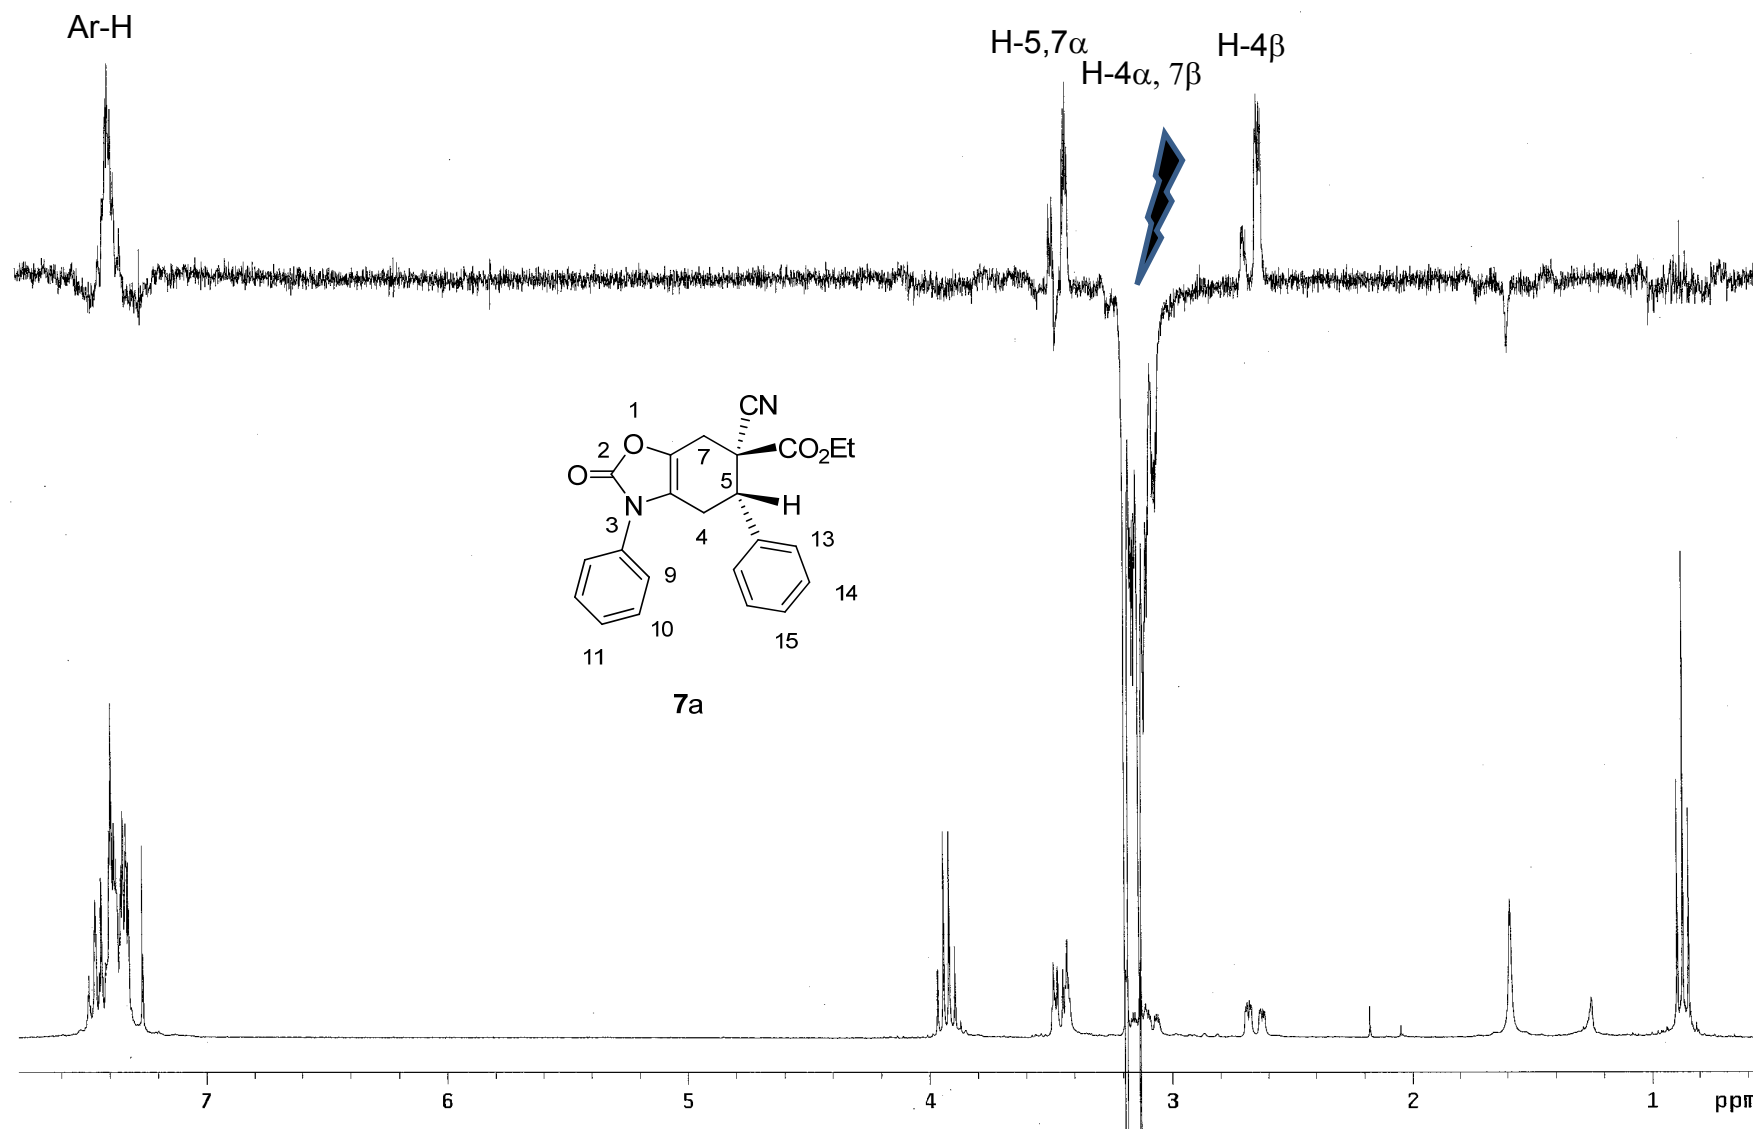NOE experiment (CDCl<sub>3</sub>) 7a

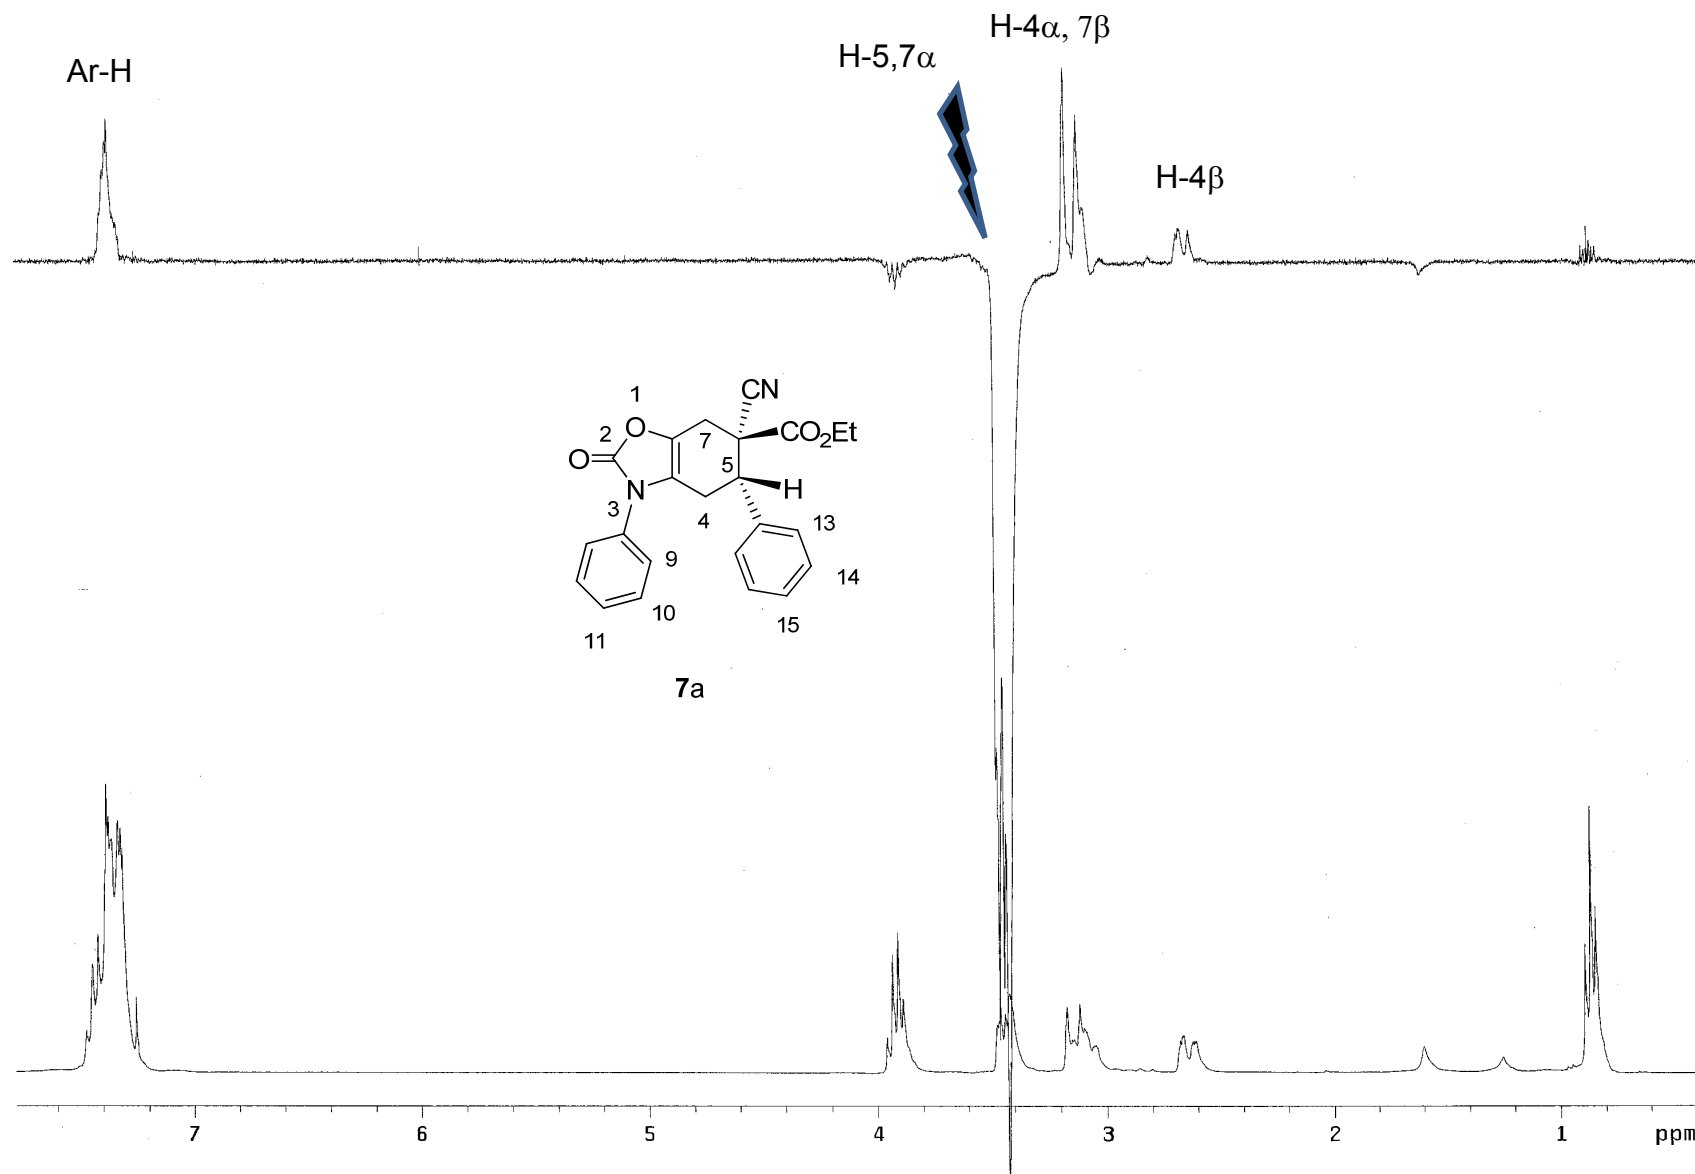NOE experiment (CDCl<sub>3</sub>) 7a

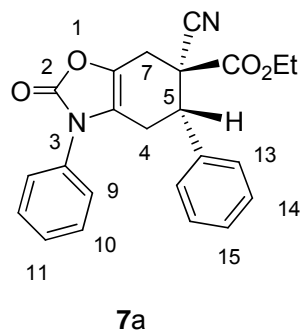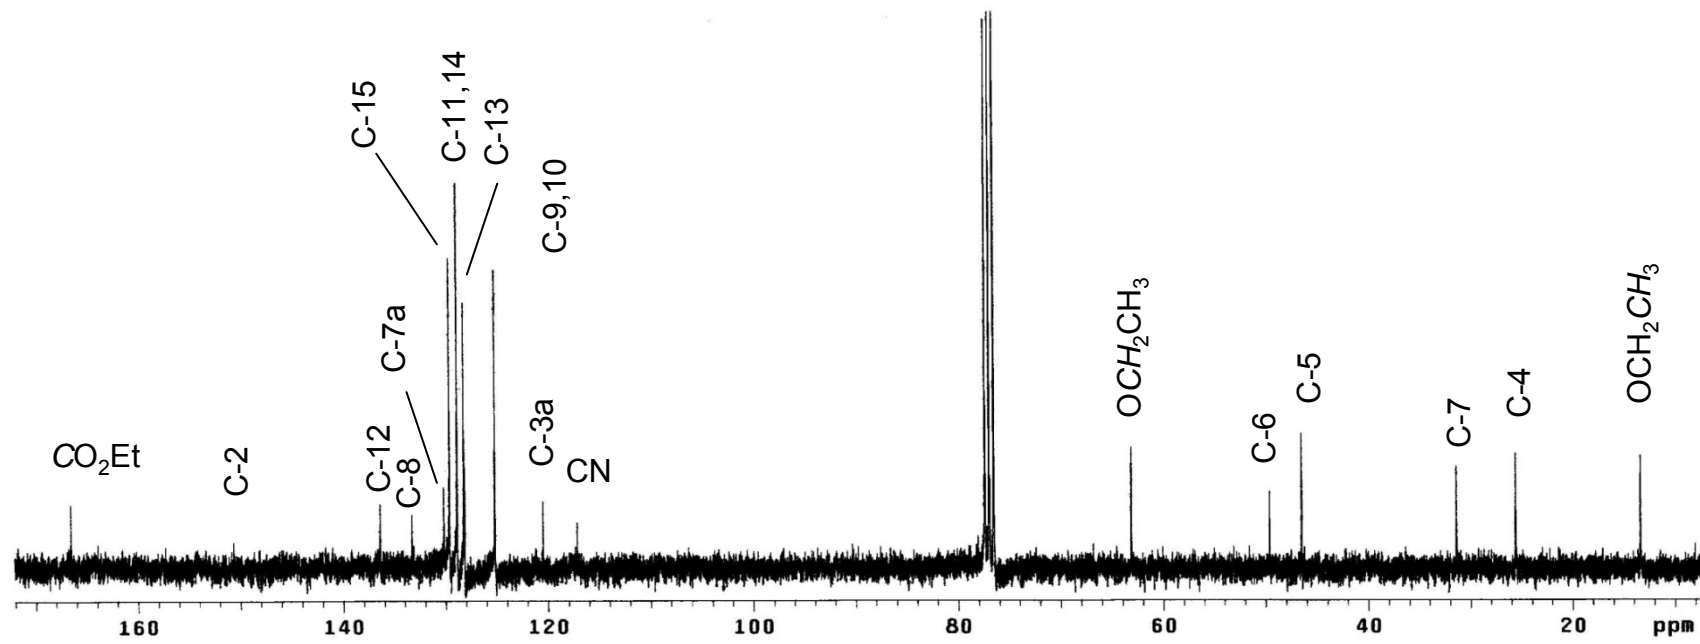

$^{13}\text{C}$  NMR ( $\text{CDCl}_3$ ) 7a

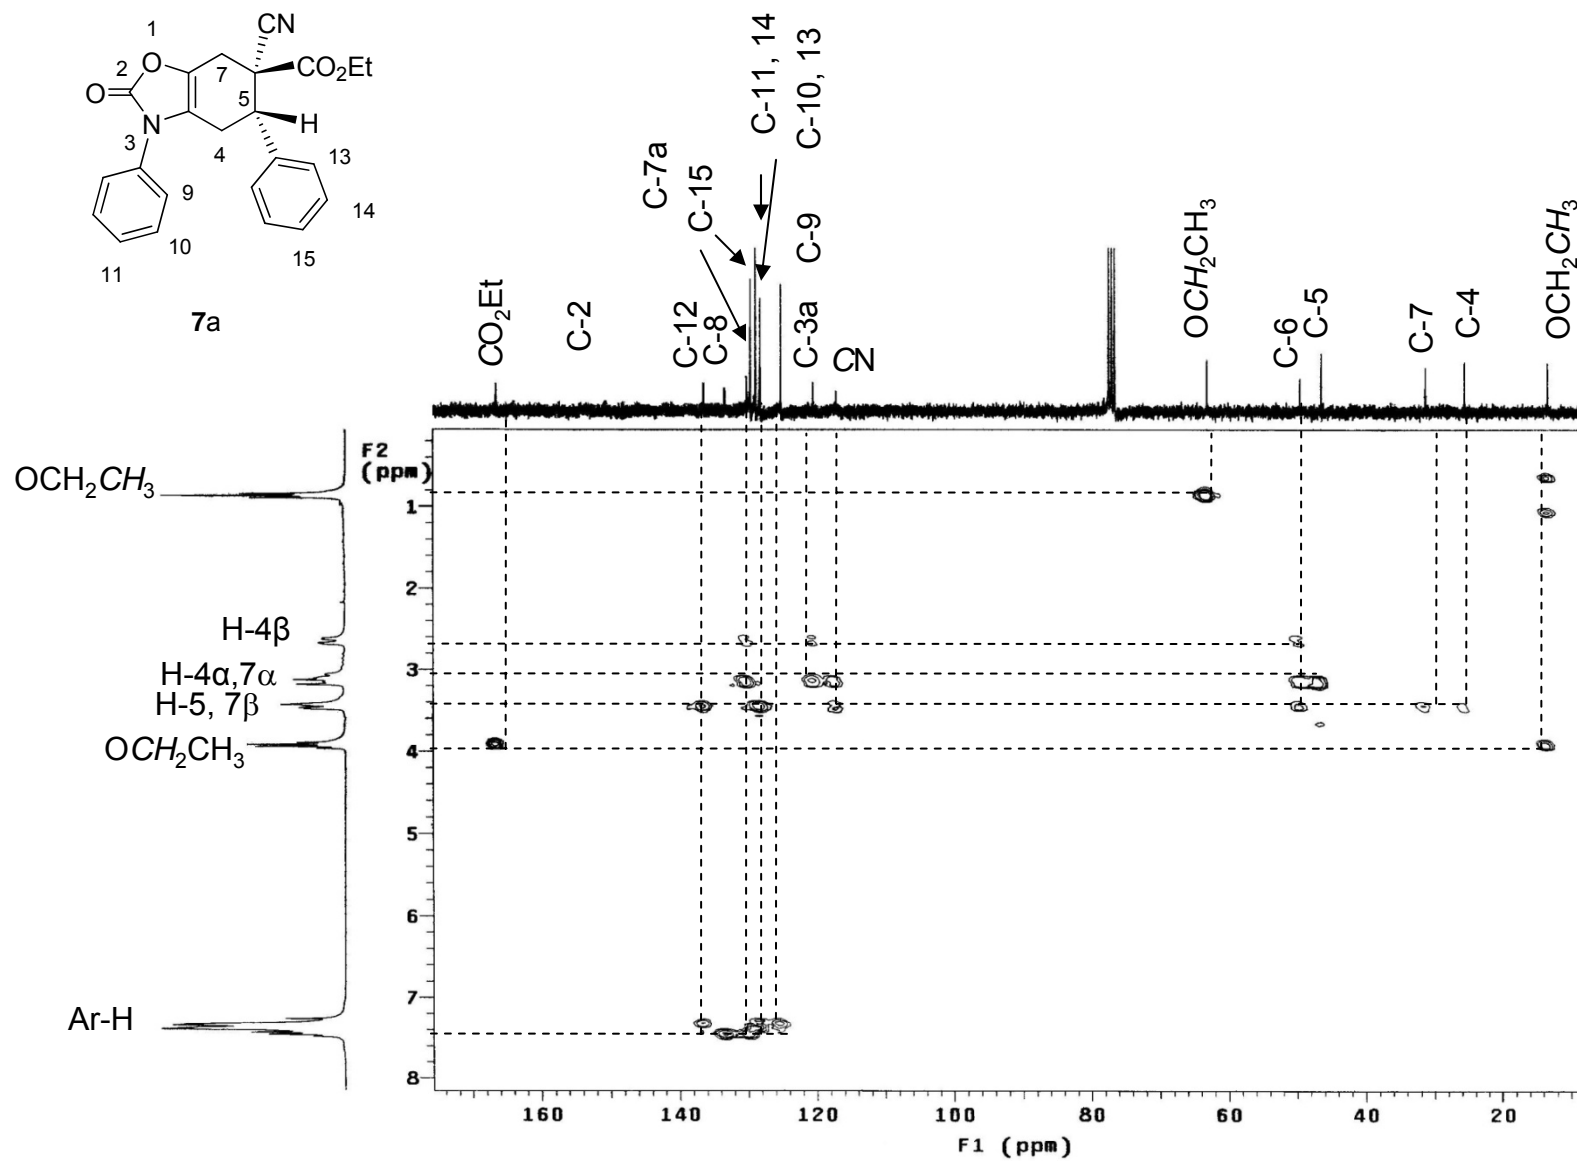HMBC experiment (CDCl<sub>3</sub>) **7a**



File: Ines 388 ID IE MI1Date Run: 02-01-2008 (Time Run: 13:05:29)  
 Sample: MI1  
 Instrument: JEOL GCmate  
 Inlet: Direct Probe Ionization mode: EI+

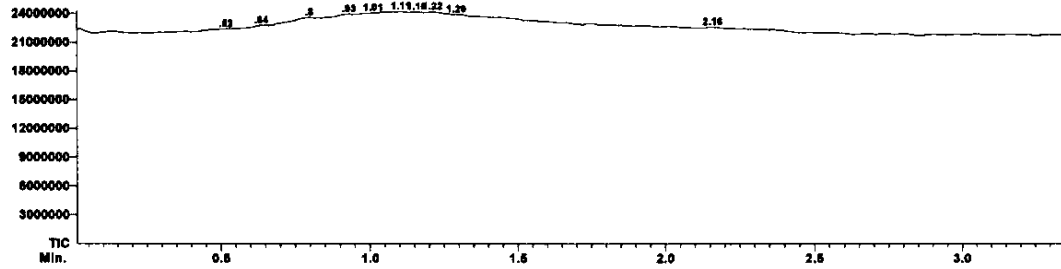

Scan: 80-147 R.T.: 1.52 #Ions: 2850  
 Base: m/z 388; 1.4%FS TIC: 942019

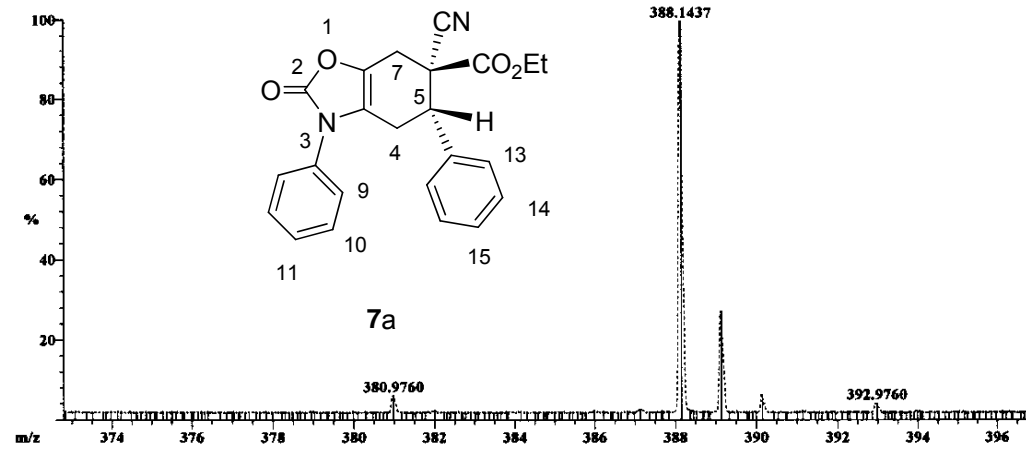

Selected Isotopes : N<sub>0-3</sub> O<sub>0-5</sub> H<sub>0-25</sub> C<sub>0-25</sub>

Error Limit : 10 mmu

| <u>Measured Mass</u> | <u>% Base</u> | <u>Formula</u>                                                | <u>Calculated Mass</u> | <u>Error</u> |
|----------------------|---------------|---------------------------------------------------------------|------------------------|--------------|
| 388.14369            | 100.0%        | C <sub>23</sub> H <sub>20</sub> N <sub>2</sub> O <sub>4</sub> | 388.14231              | 1.4          |

HRMS 7a

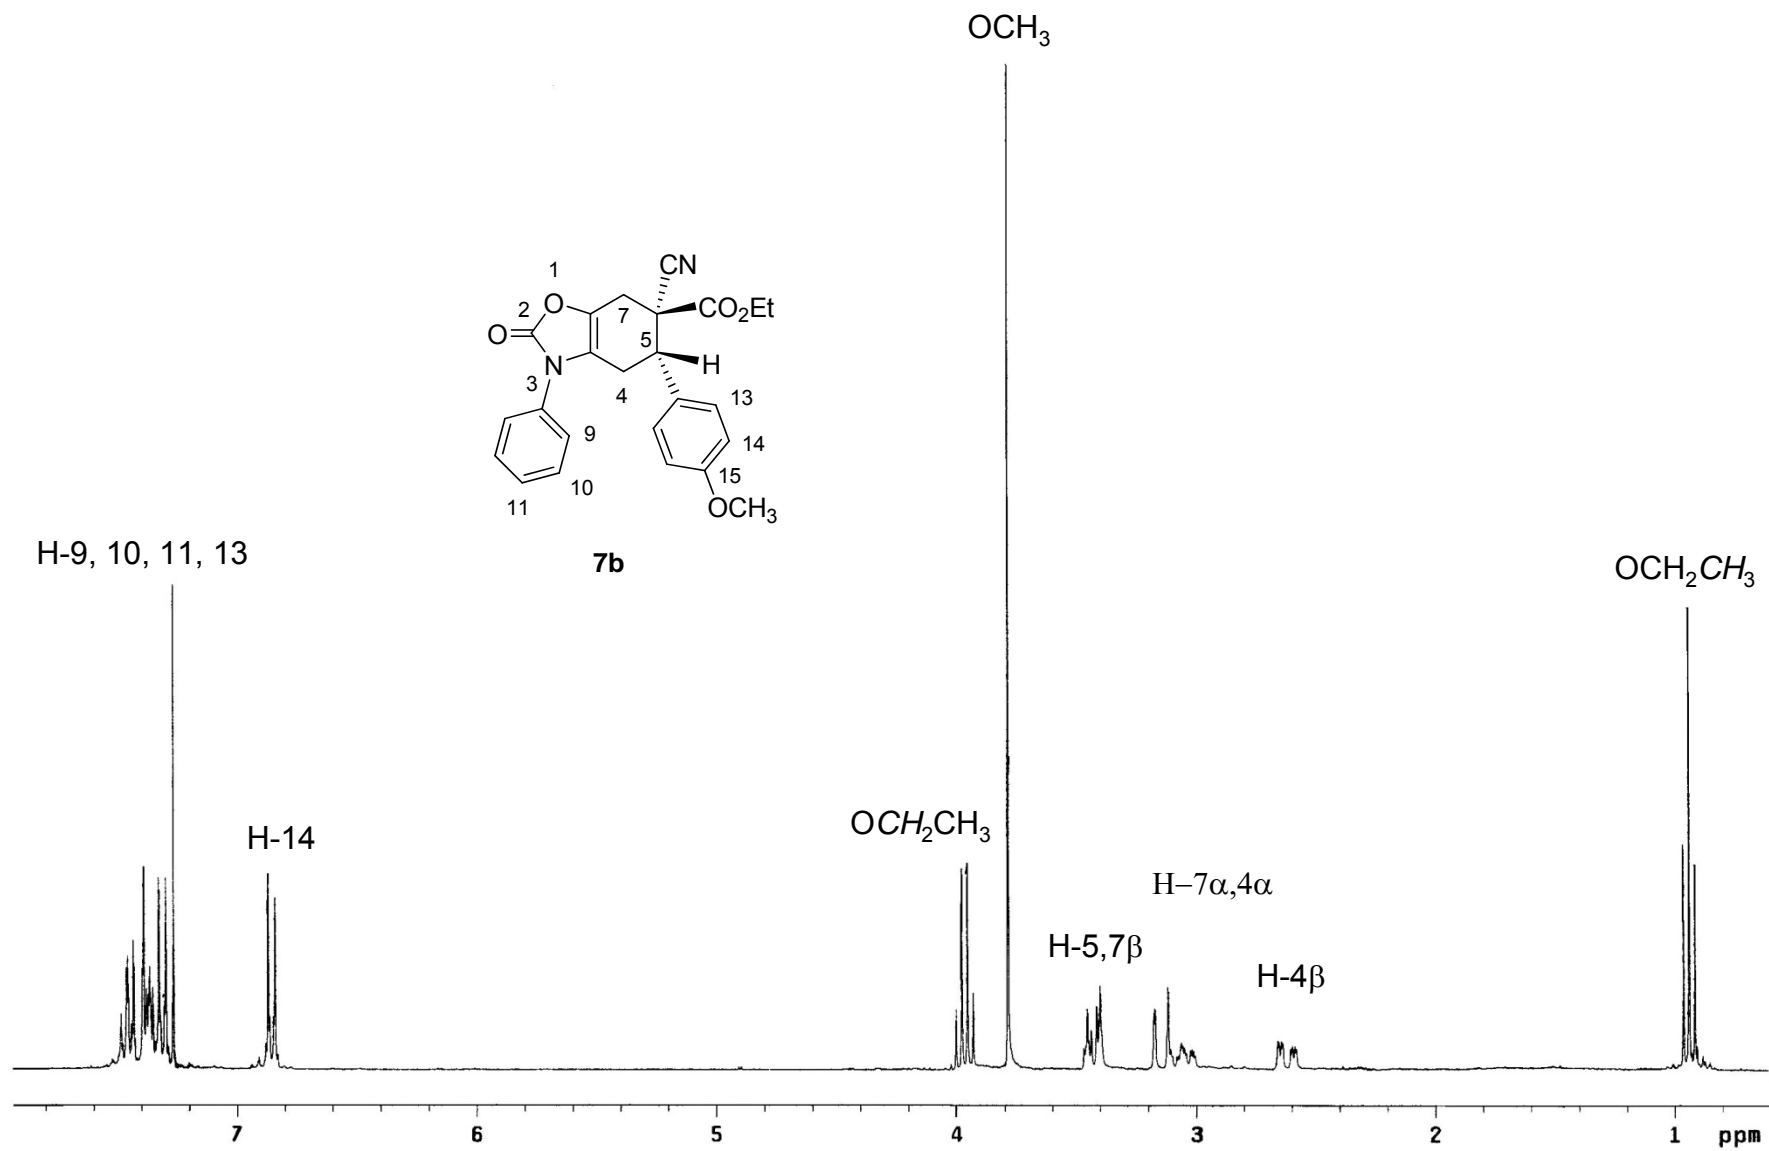 $^1\text{H}$  NMR ( $\text{CDCl}_3$ ) **7b**

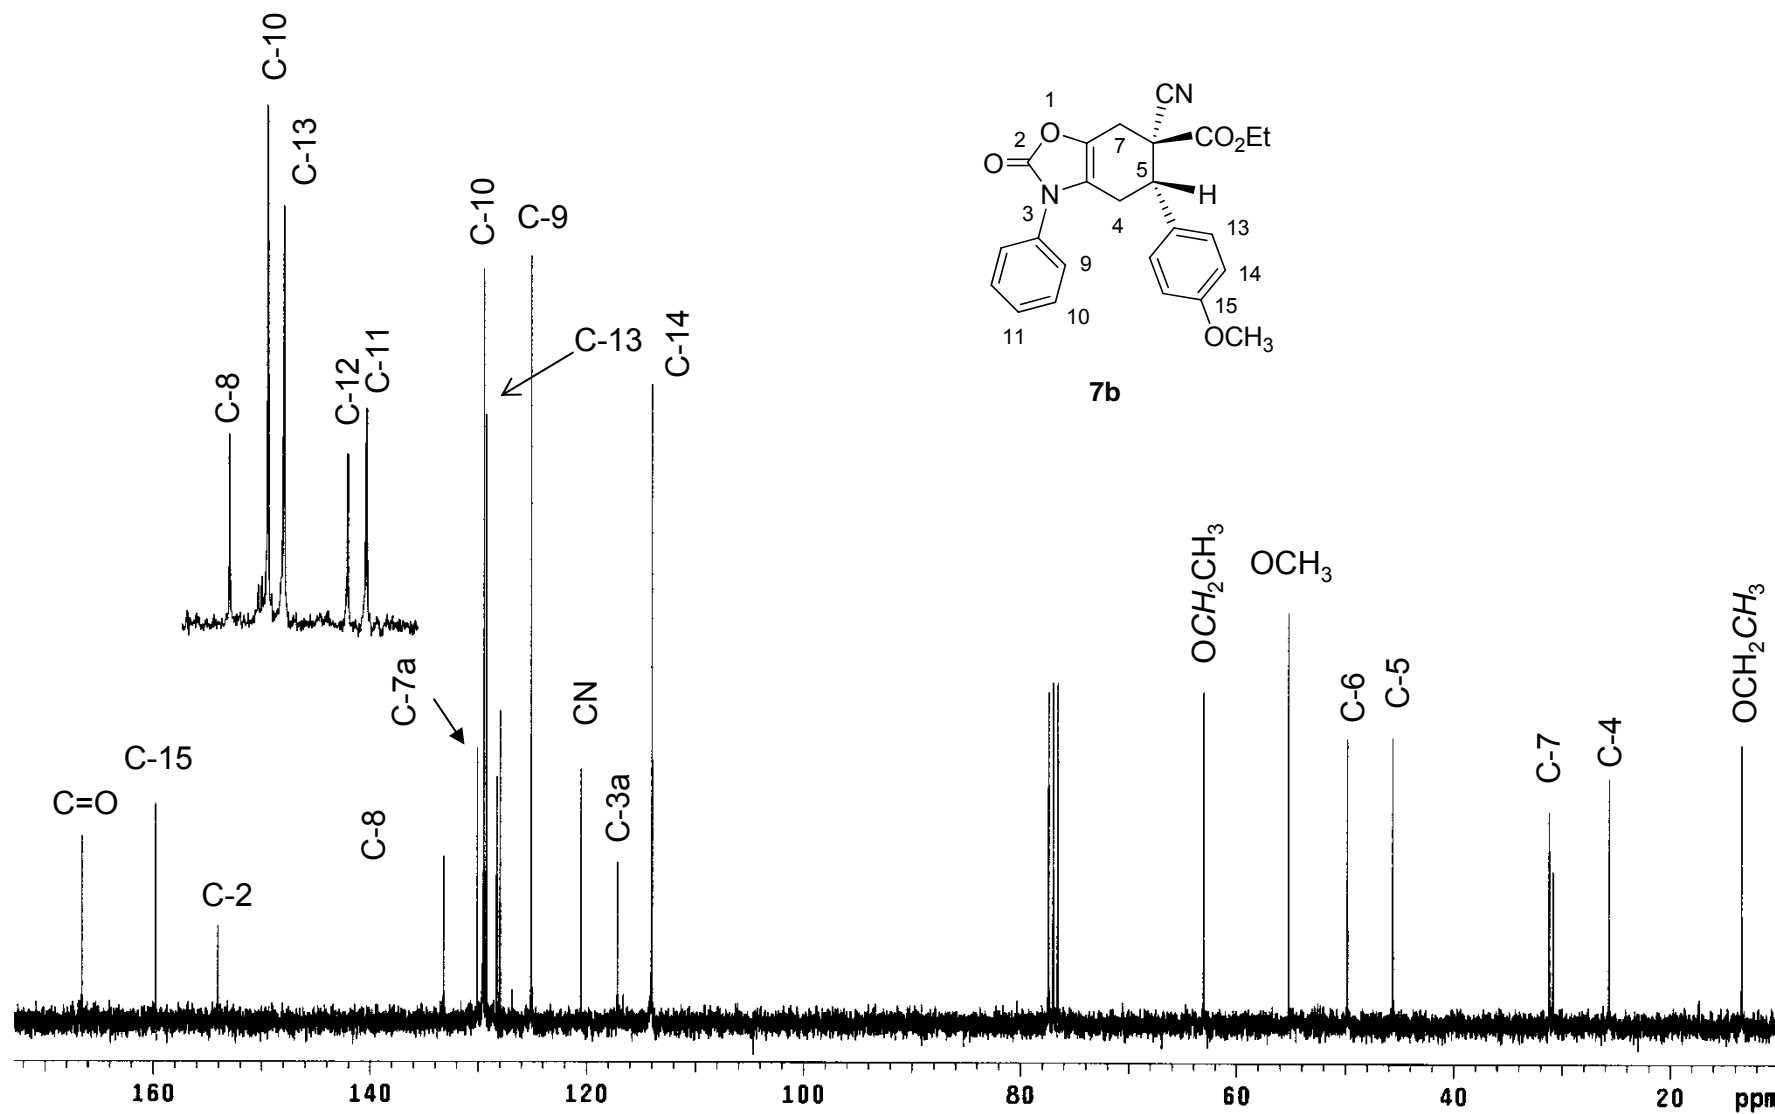

**13C NMR (CDCl<sub>3</sub>) 7b**

S11

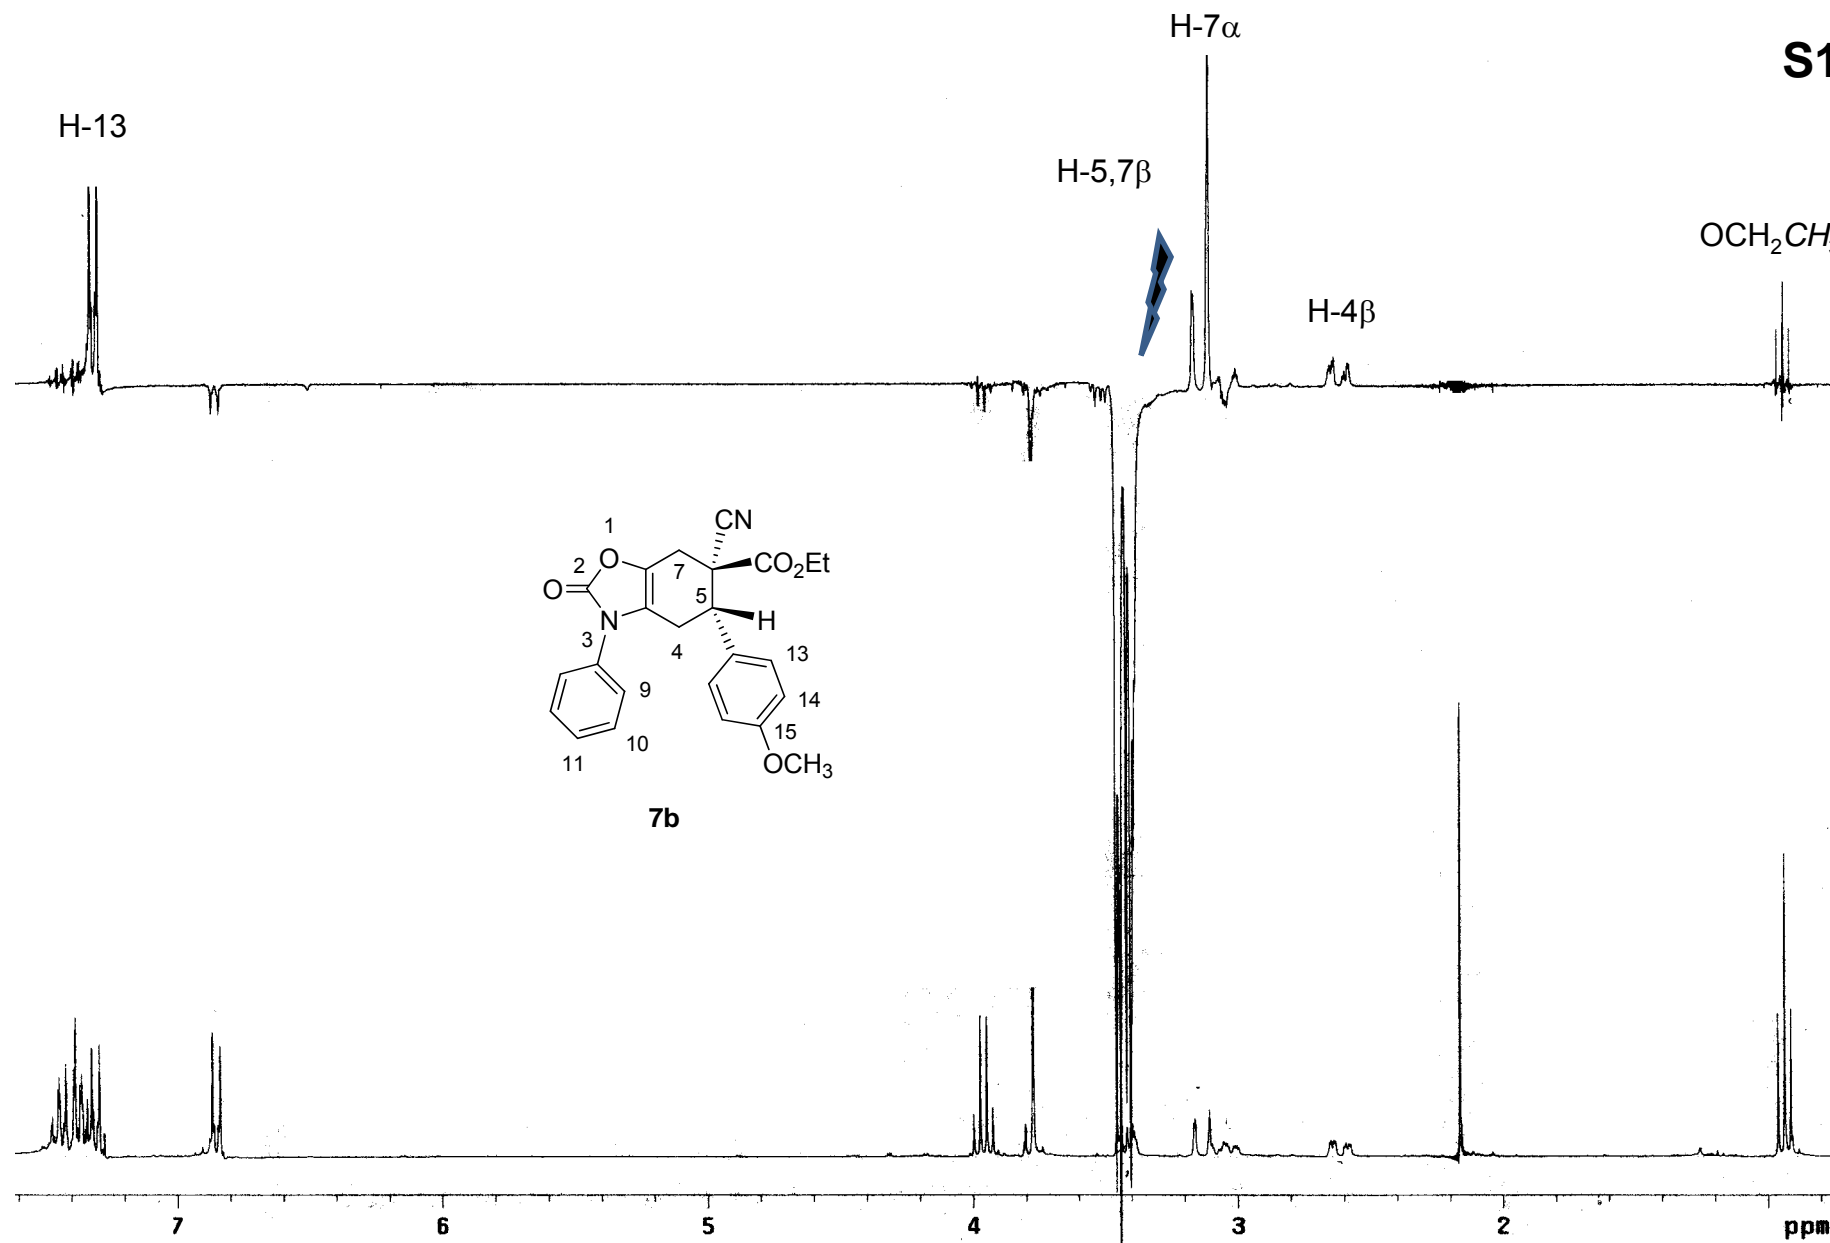

NOE experiment ( $\text{CDCl}_3$ ) **7b**

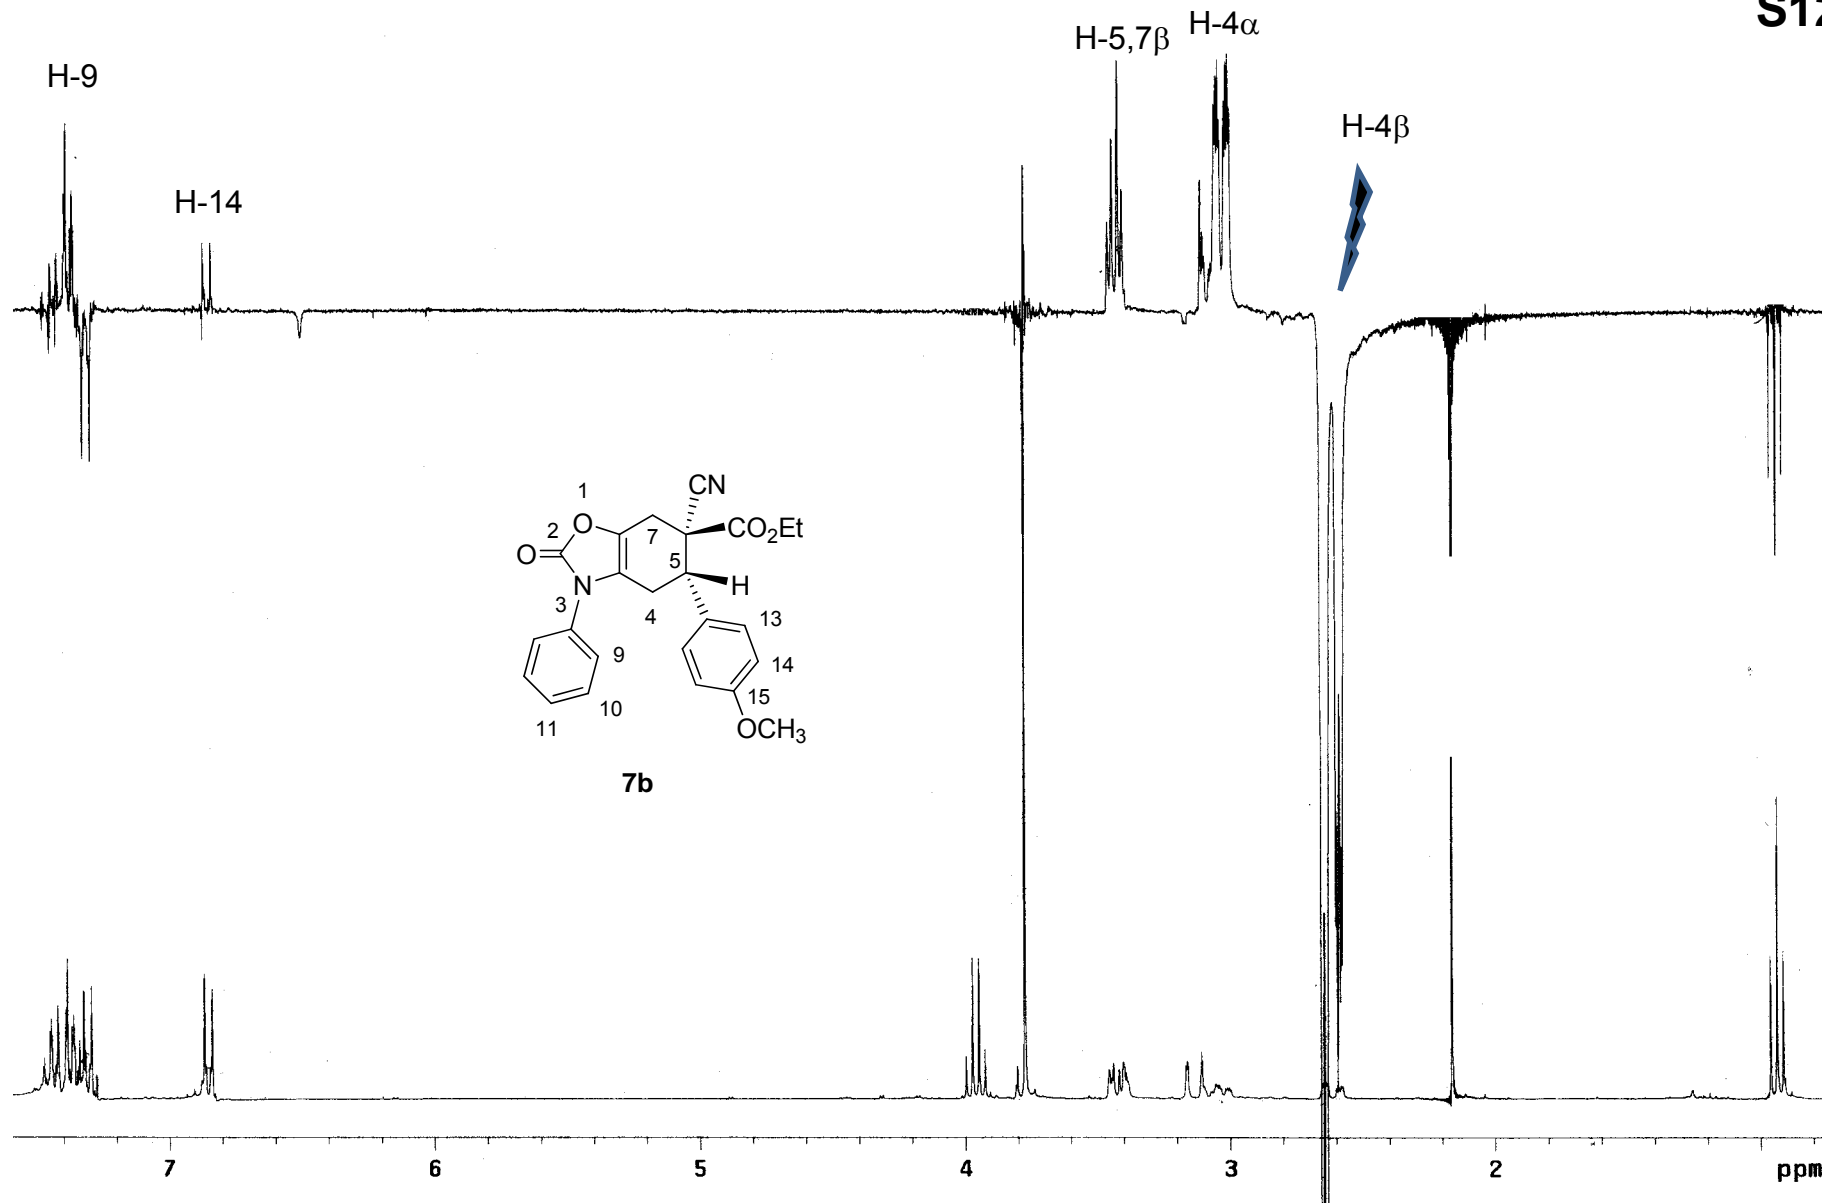NOE experiment (CDCl<sub>3</sub>) **7b**

File: Ines MI3 IDIE 418 Date Run: 05-29-2008 (Time Run: 23:05:56)  
 Sample: Ines MI3 IDIE 418  
 Instrument: JEOL GCmate  
 Inlet: Direct Probe Ionization mode: EI+

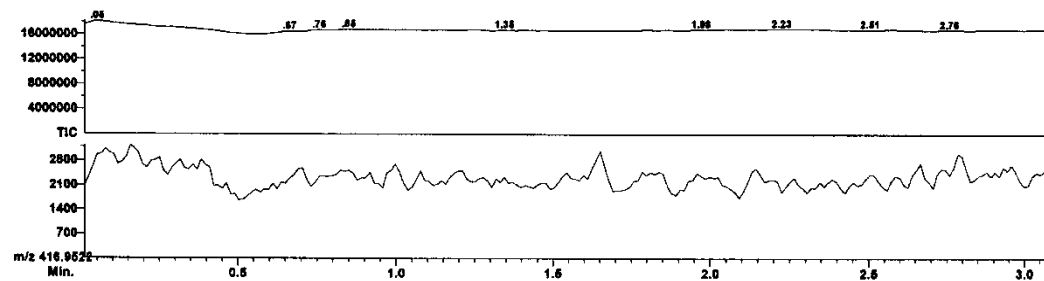

Scan: 124-145

R.T.: 1.8

Base: m/z 281; 4.2%FS TIC: 882674

#Ions: 1773

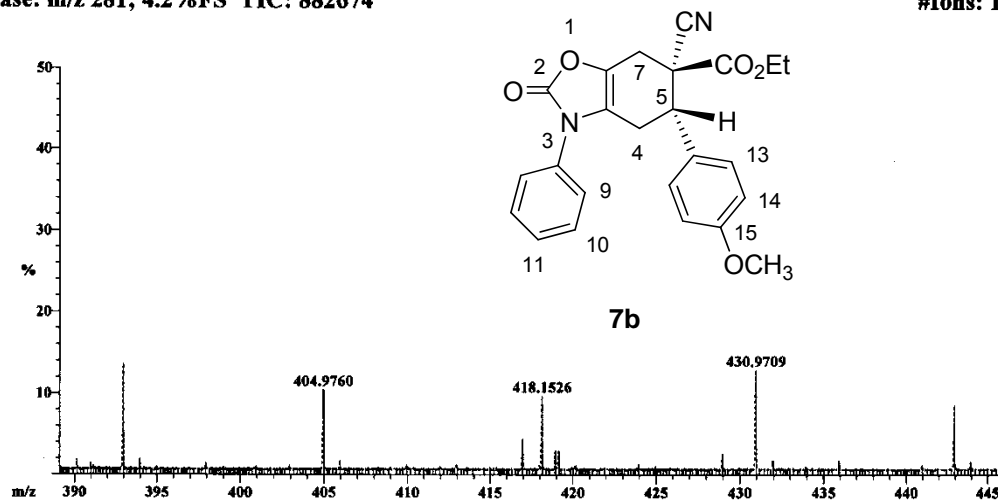Selected Isotopes : H<sub>0-22</sub> C<sub>0-24</sub> N<sub>0-2</sub> O<sub>0-5</sub>

Error Limit : 20 mmu

| <u>Measured Mass</u> | <u>% Base</u> | <u>Formula</u>                                                | <u>Calculated Mass</u> | <u>Error</u> |
|----------------------|---------------|---------------------------------------------------------------|------------------------|--------------|
| 418.1526             | 9.8%          | C <sub>24</sub> H <sub>22</sub> N <sub>2</sub> O <sub>5</sub> | 418.1529               | -0.3         |

HRMS 7b

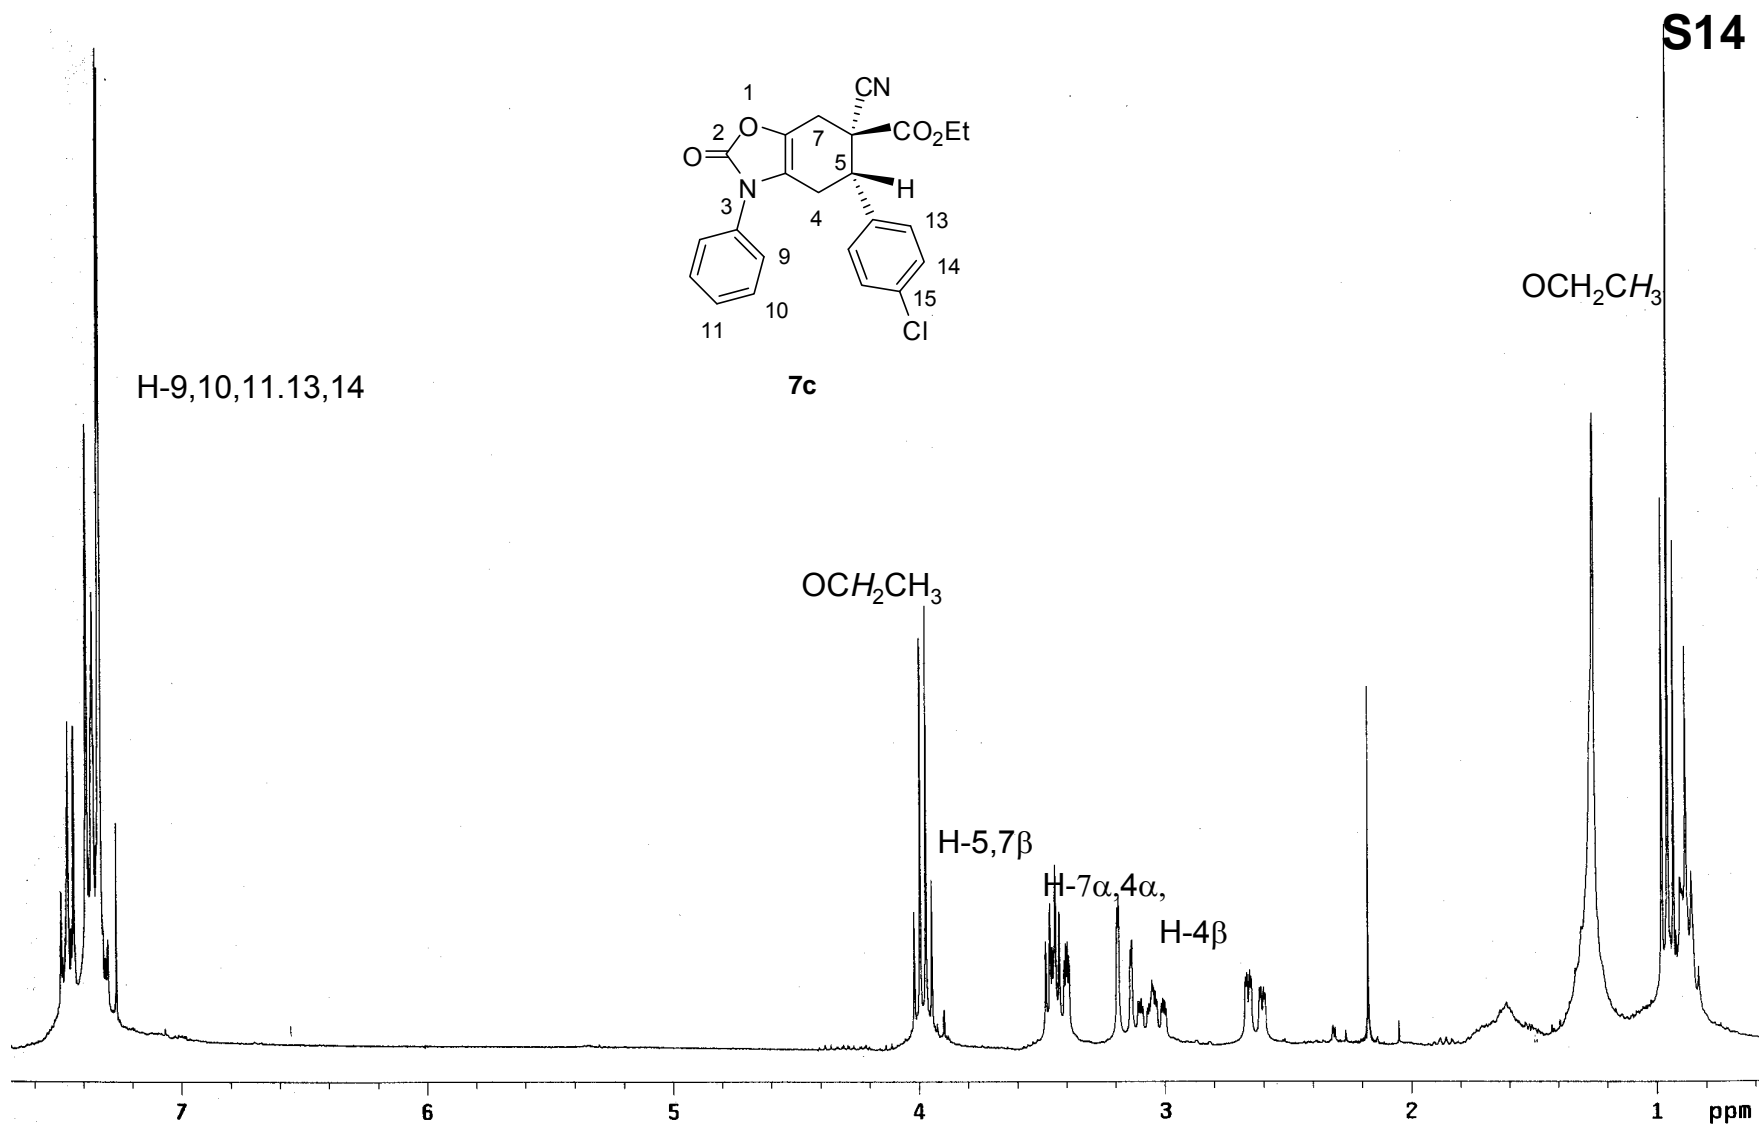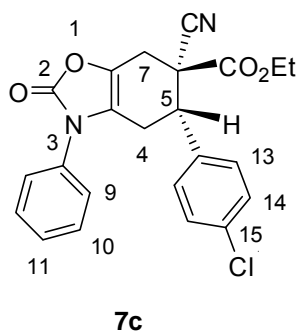

<sup>1</sup>H NMR (CDCl<sub>3</sub>) **7c**

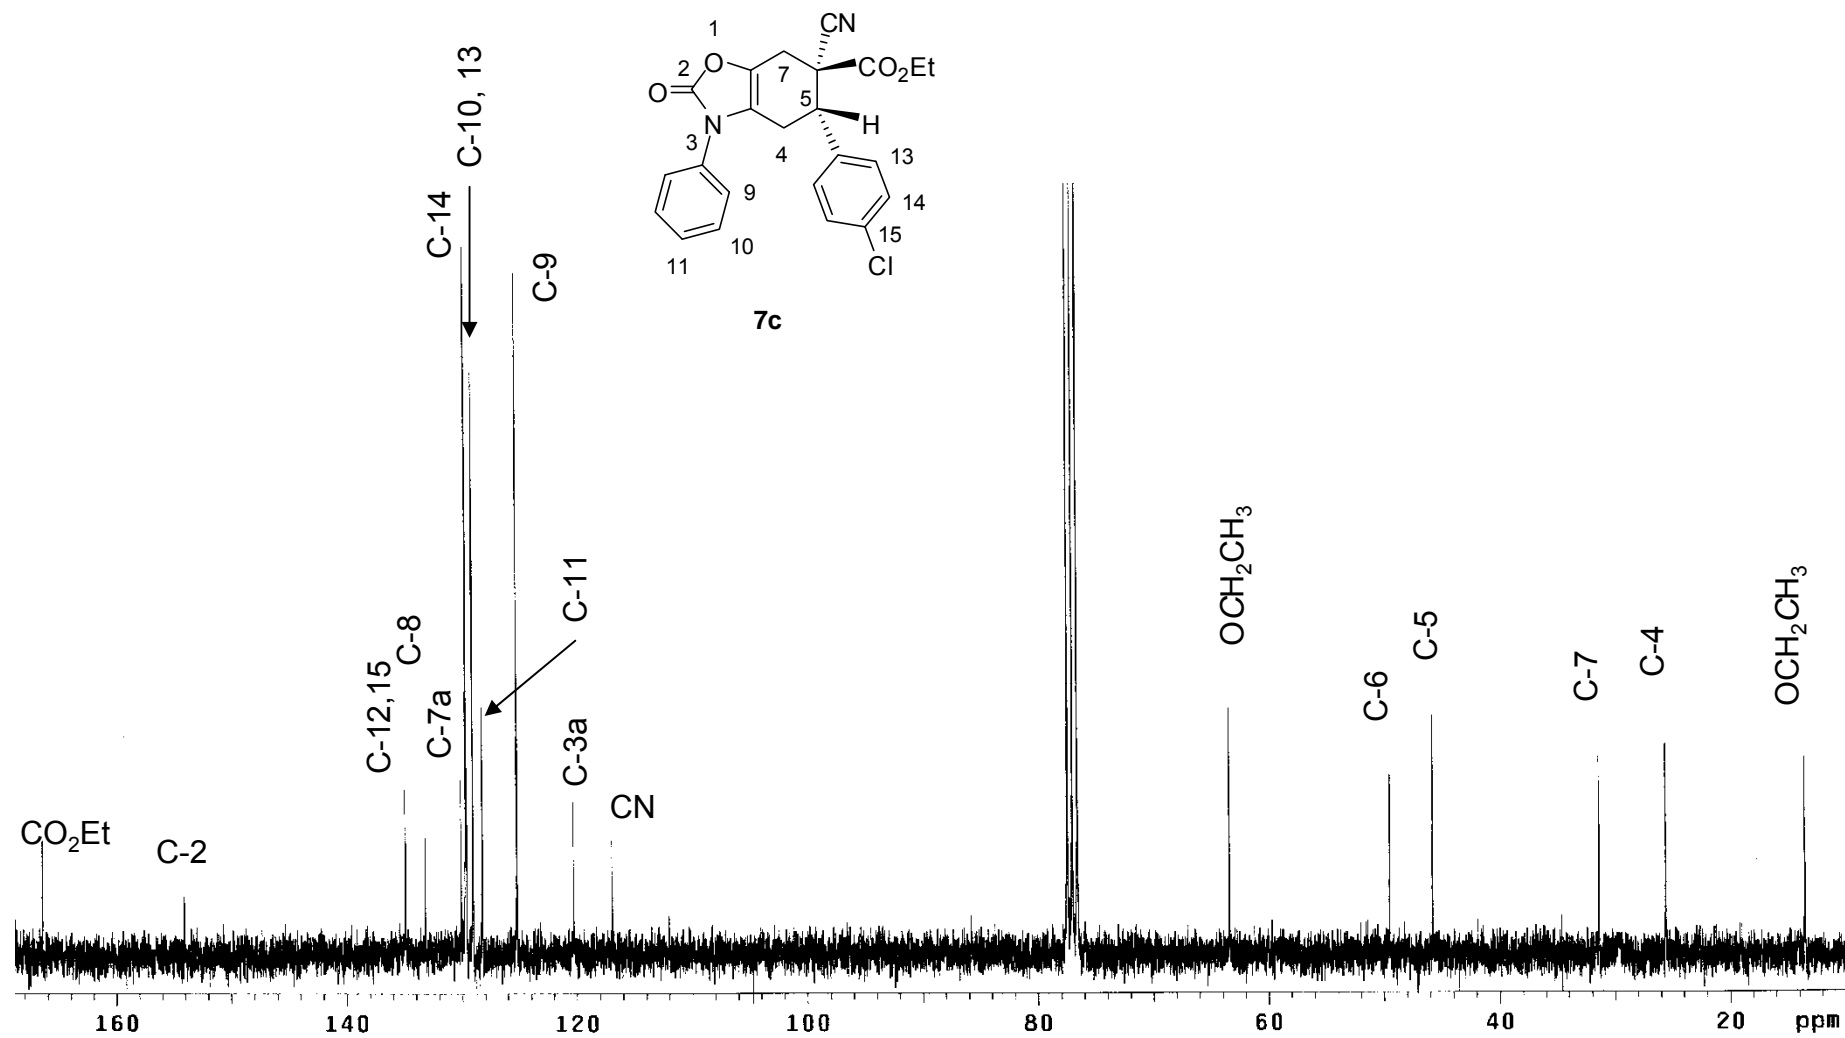



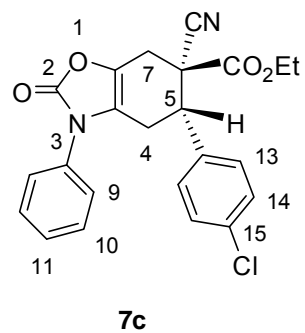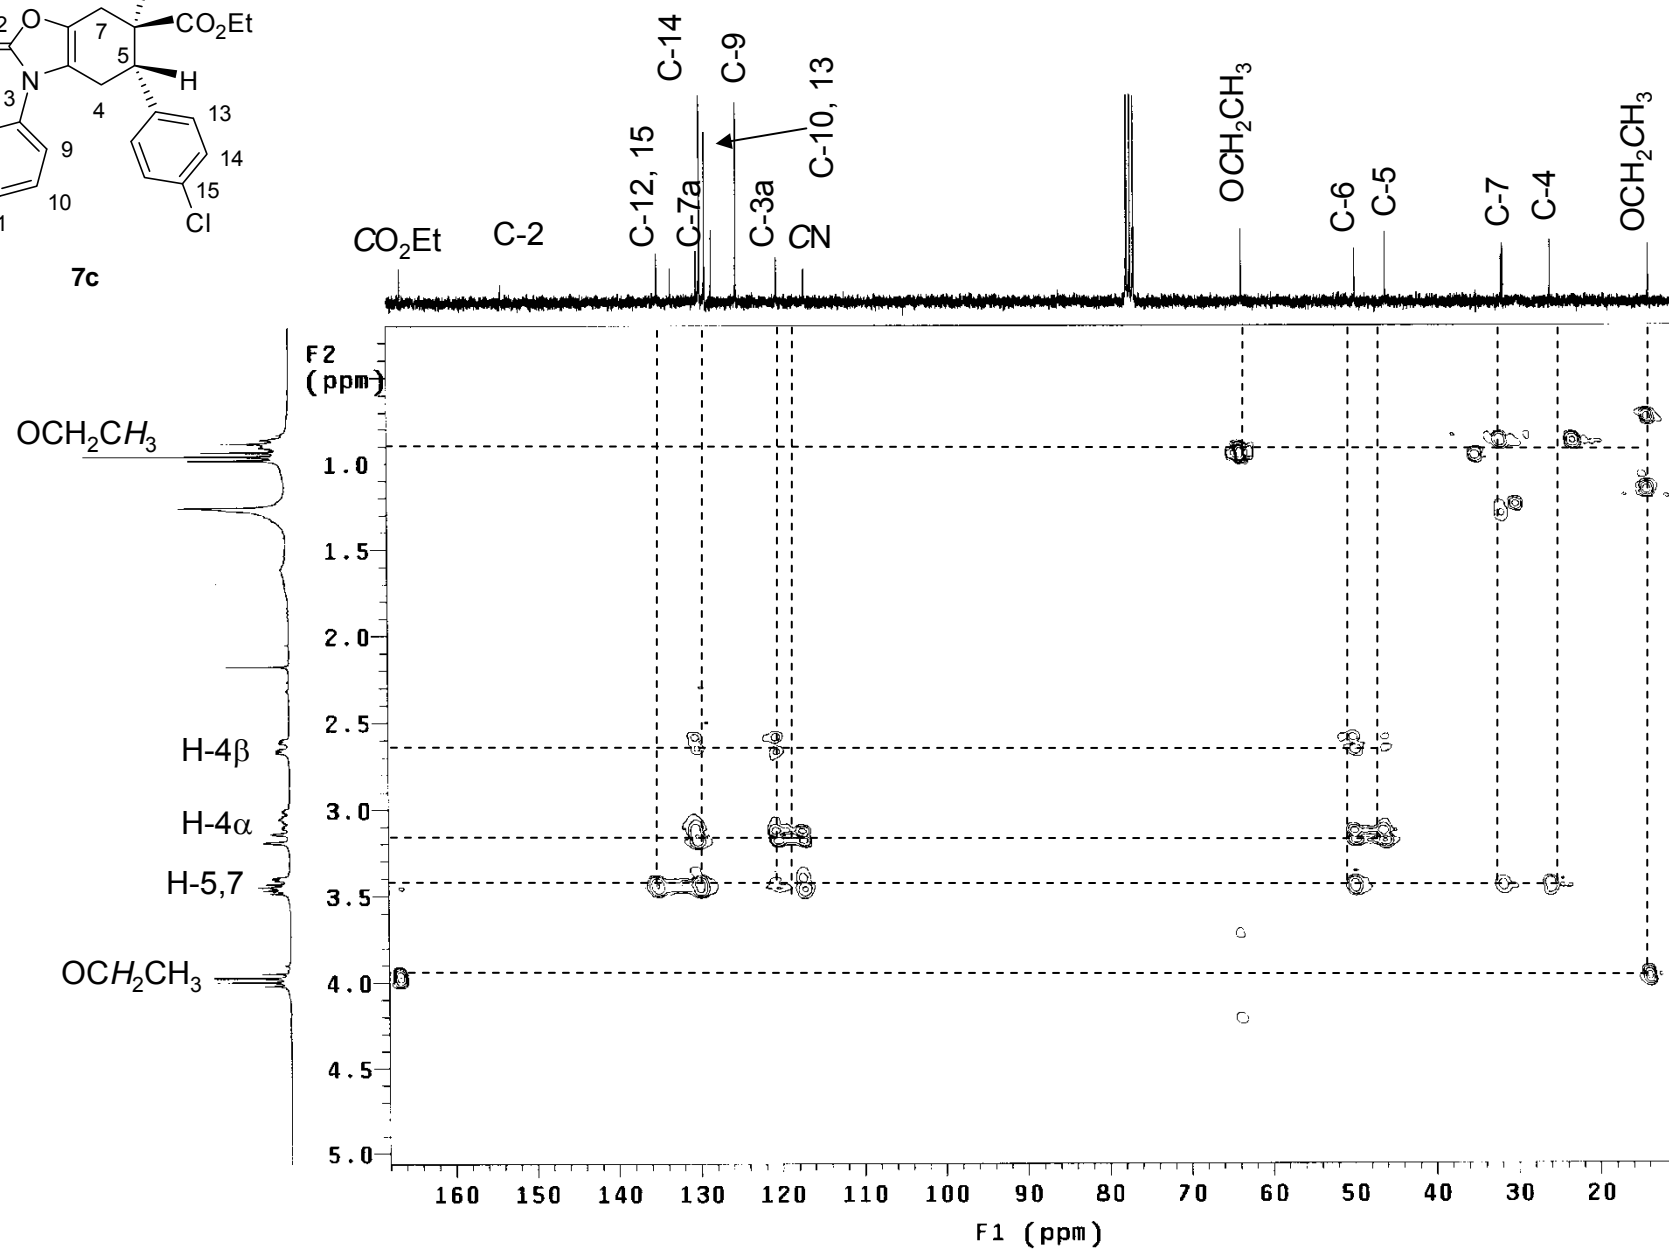

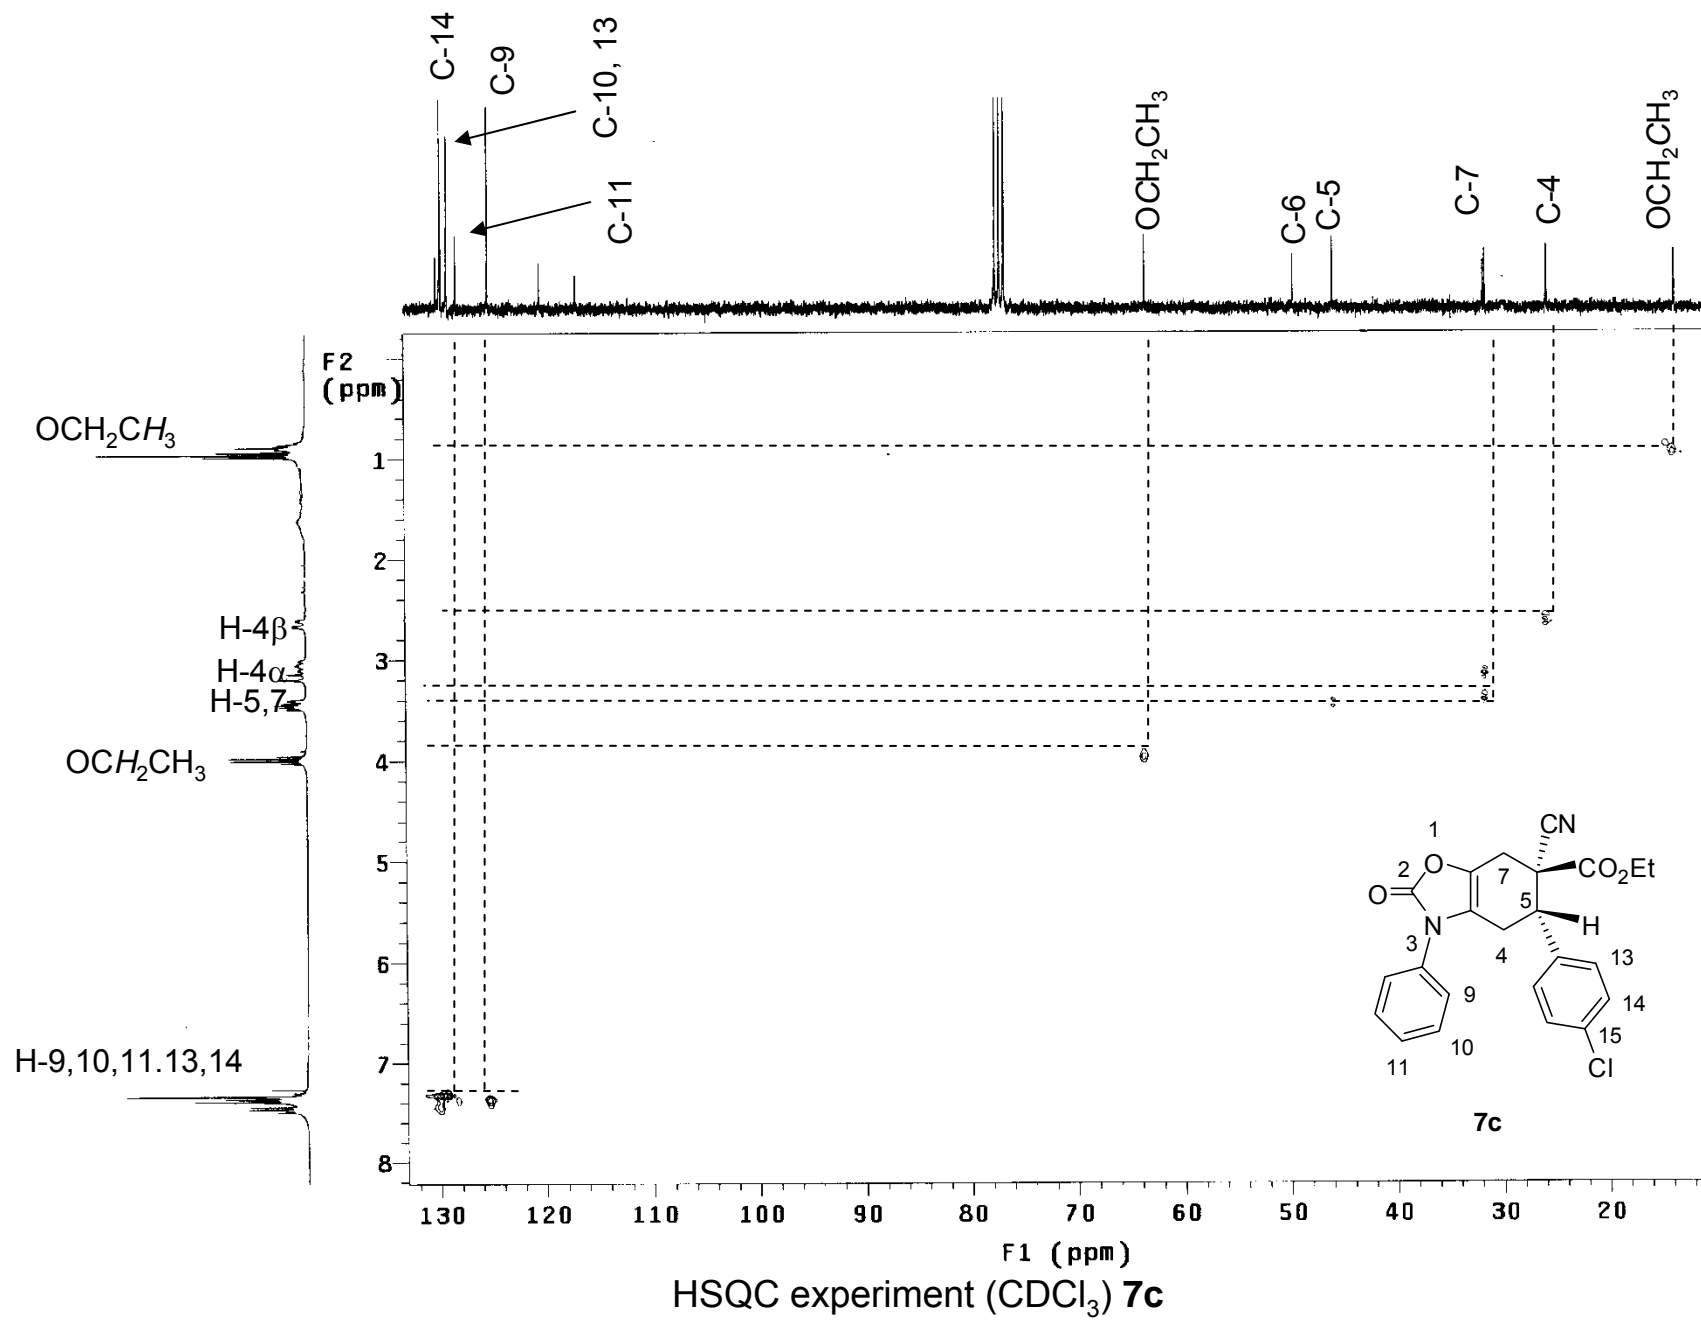

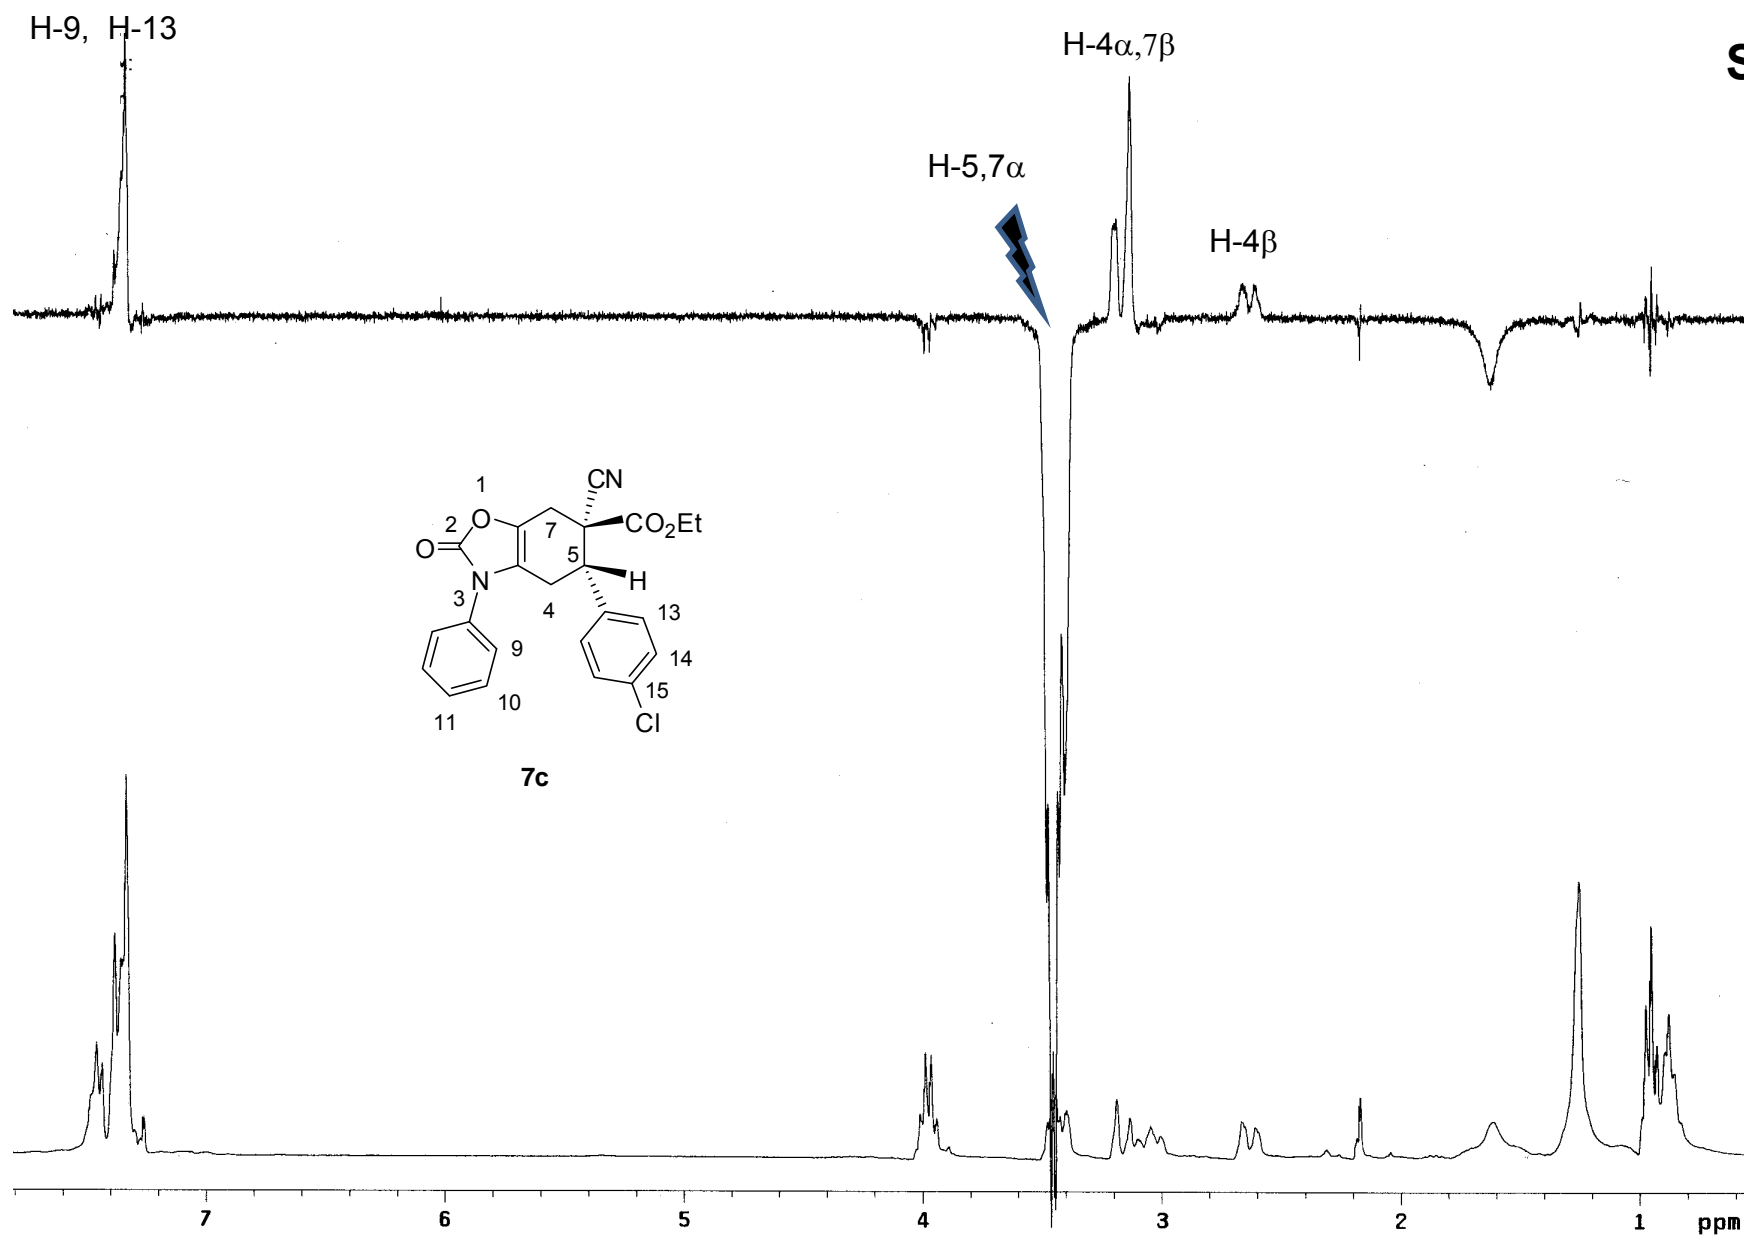

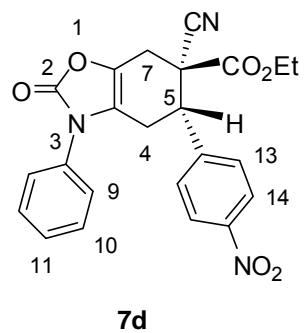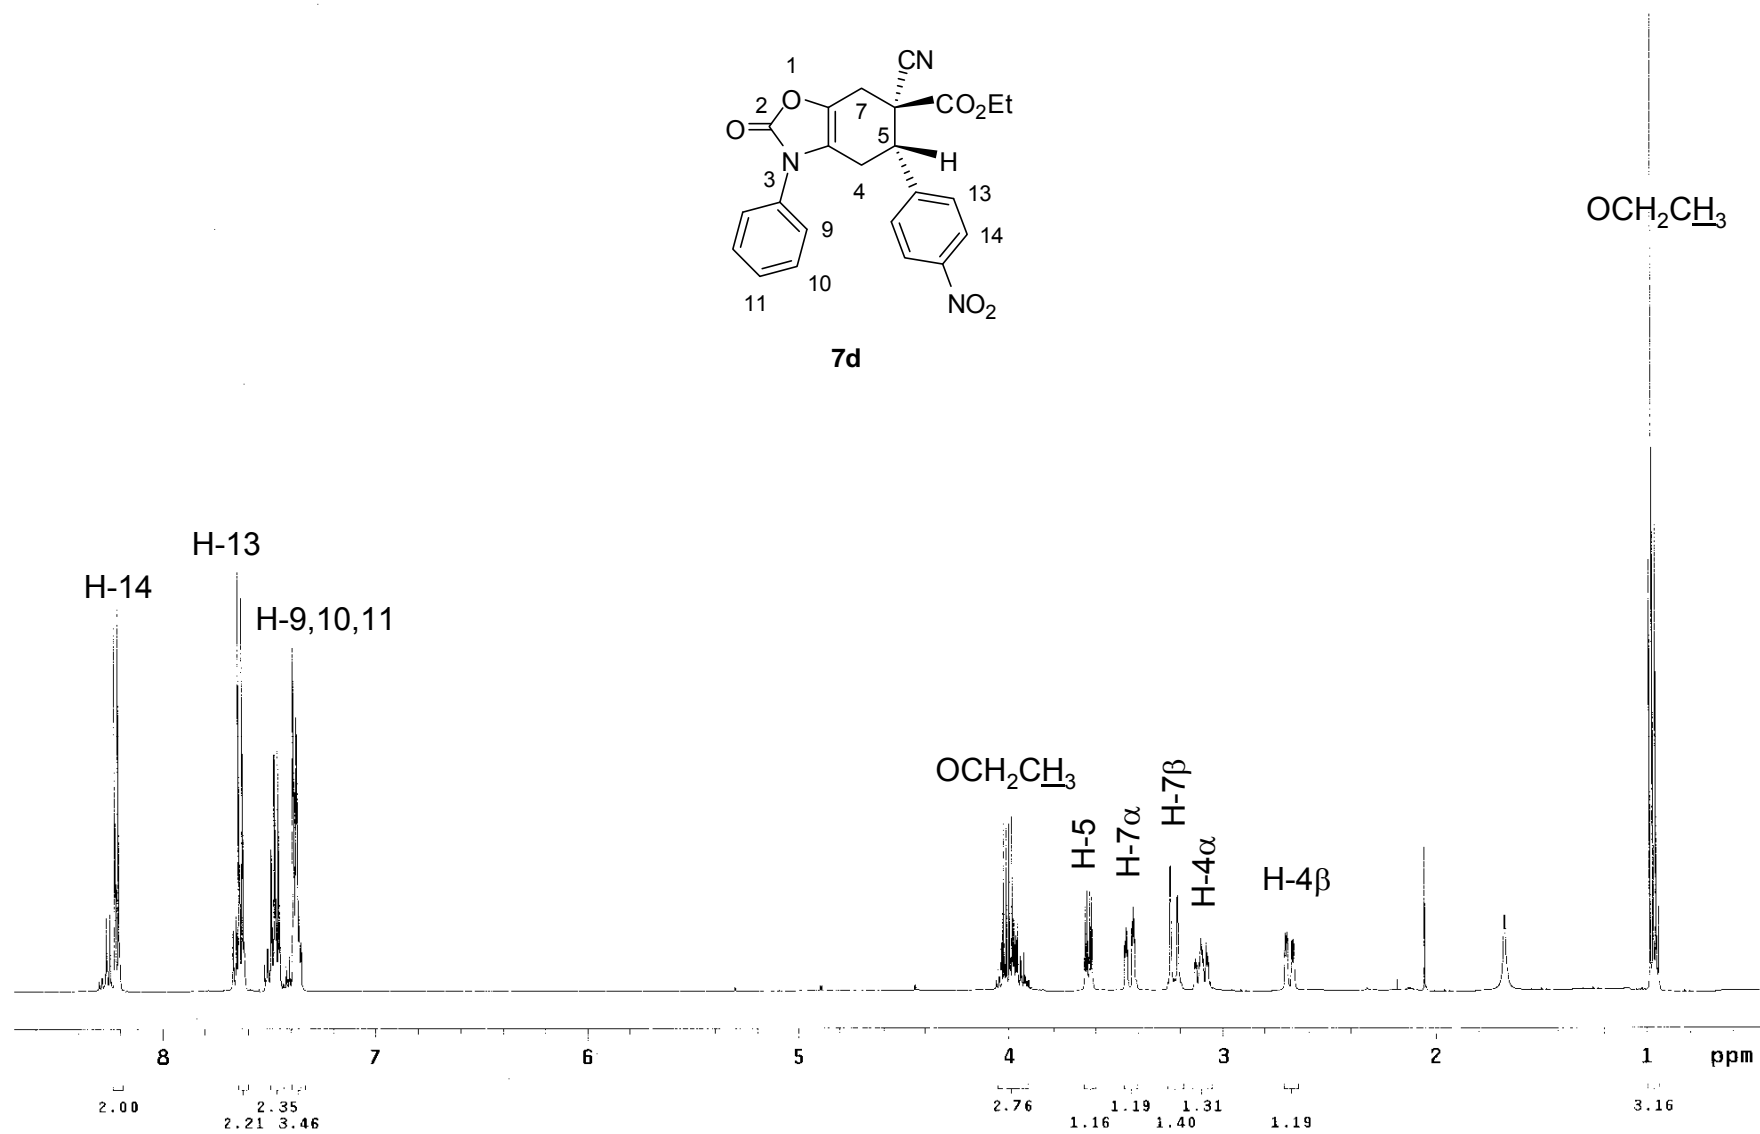

$^1\text{H}$  NMR ( $\text{CDCl}_3$ ) 7d

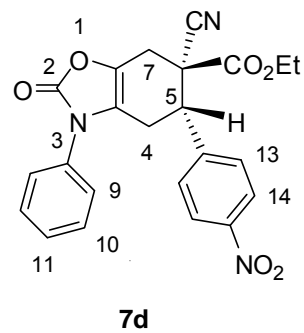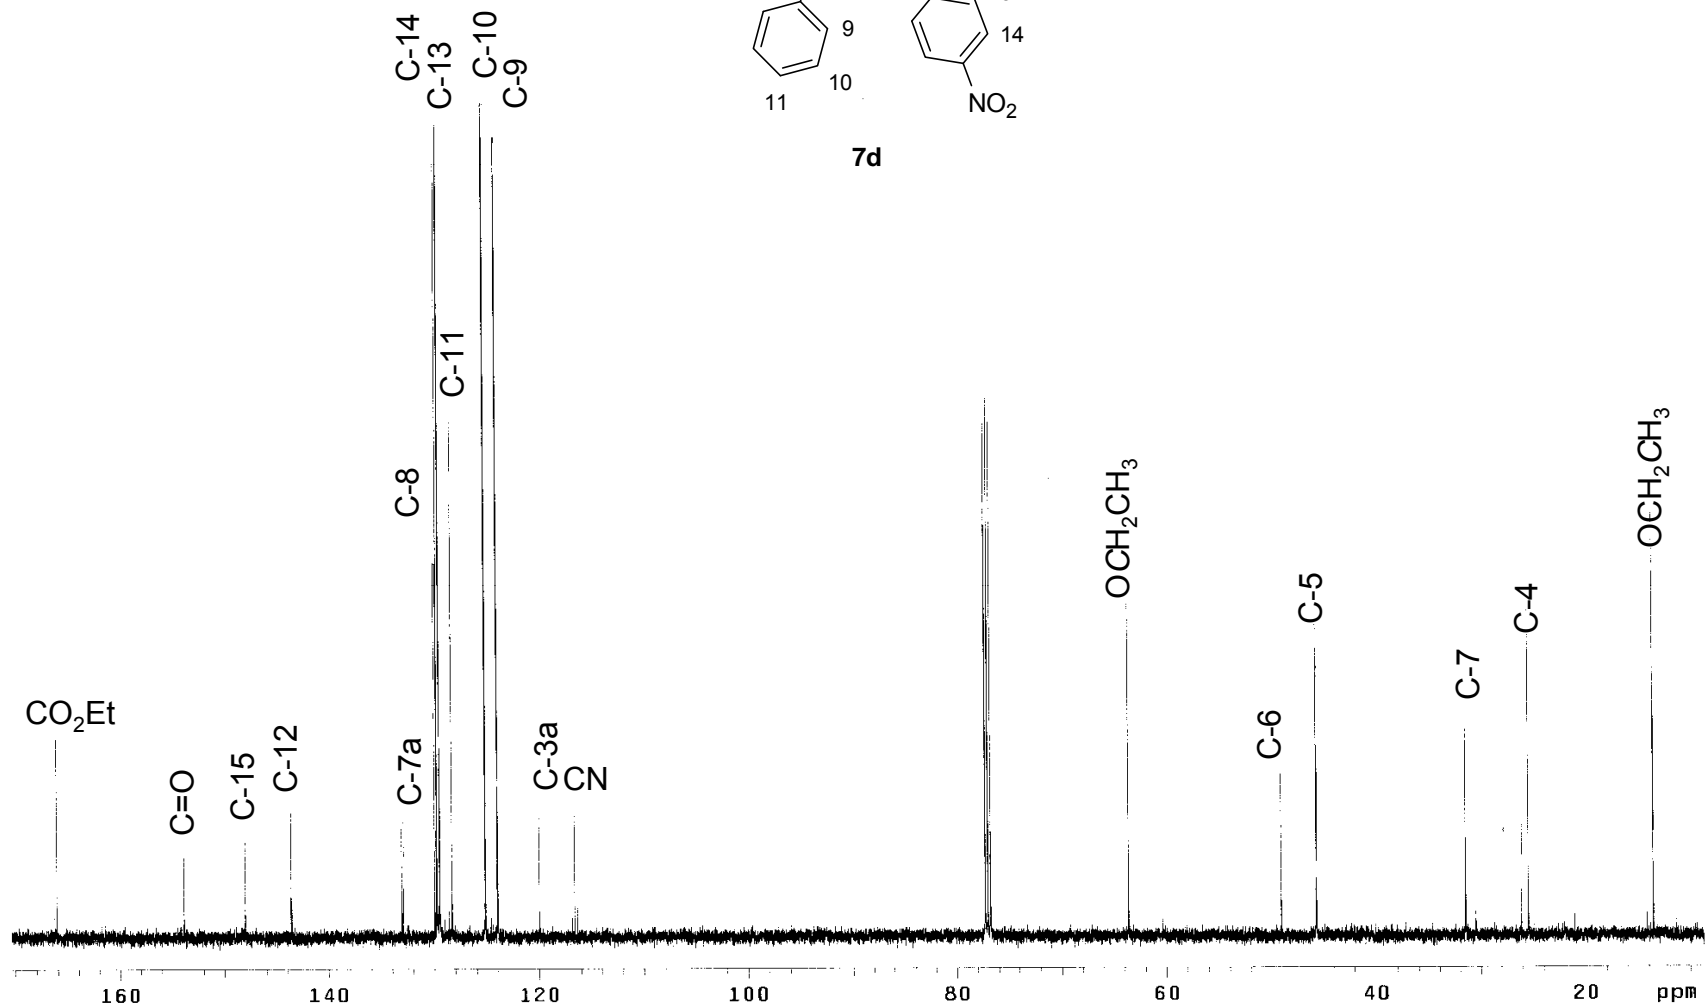

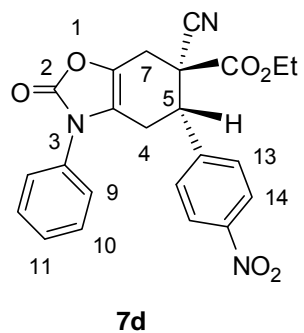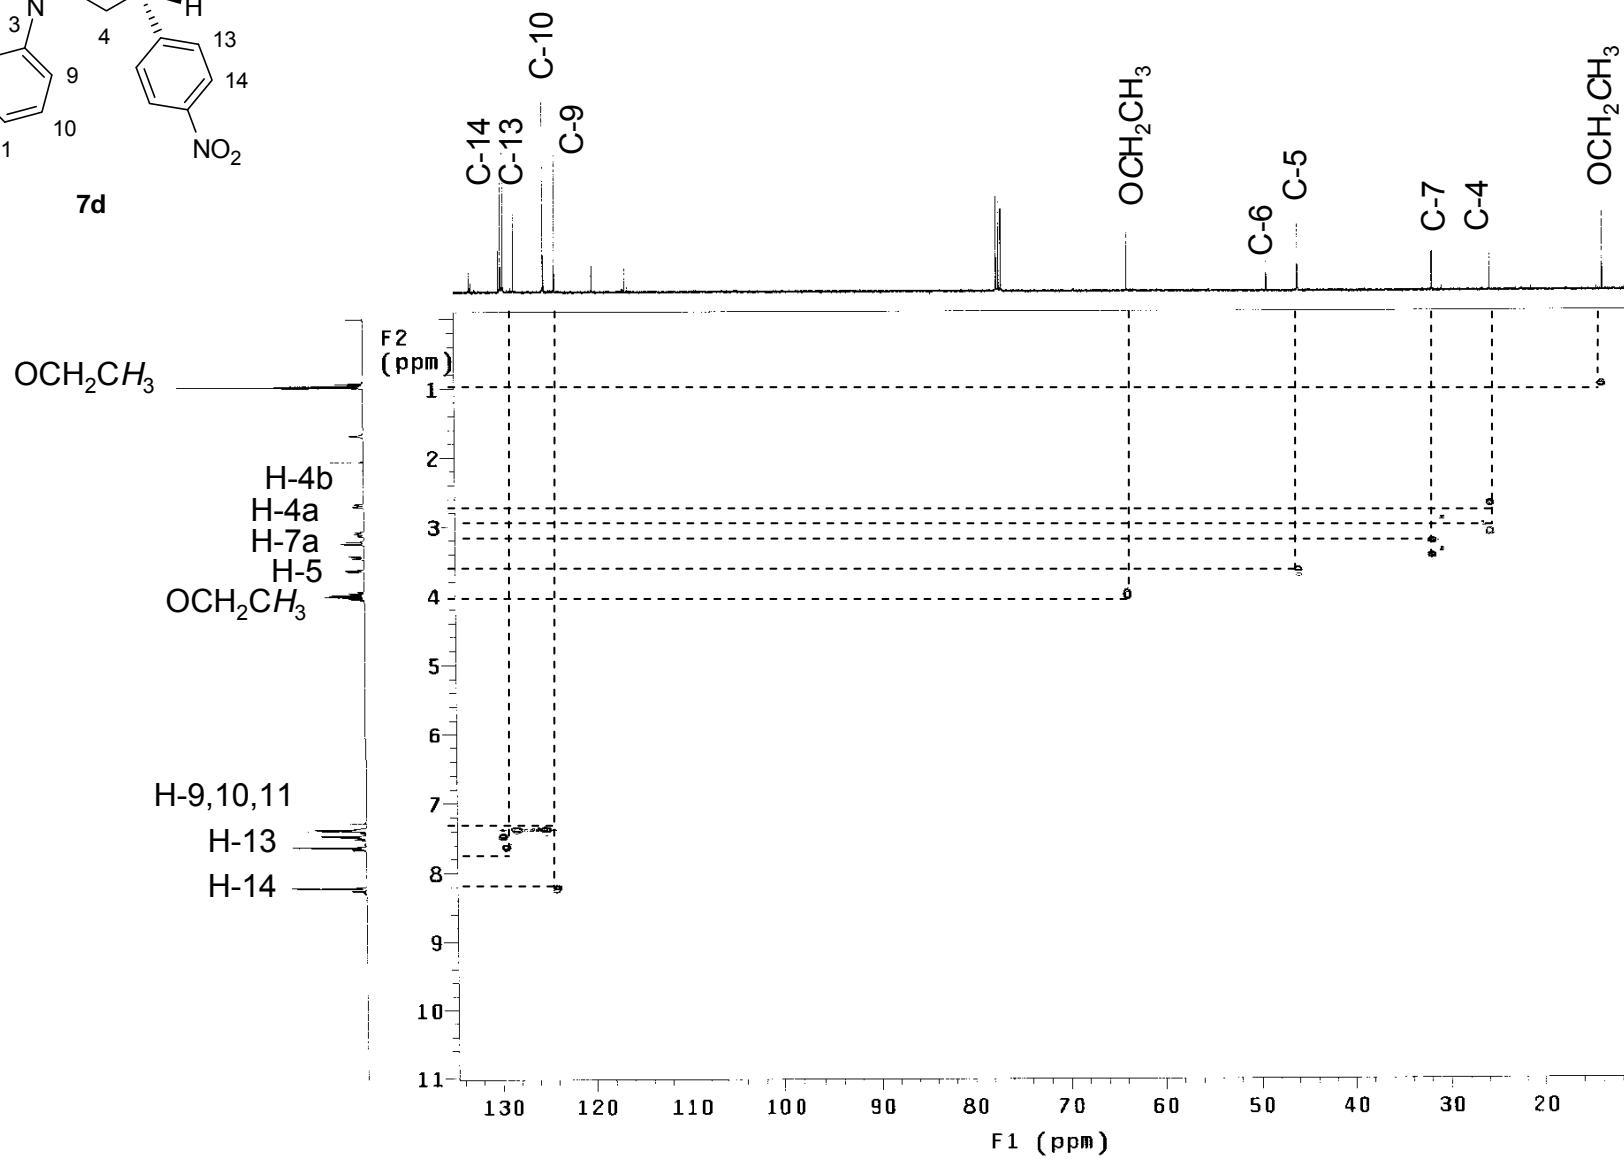

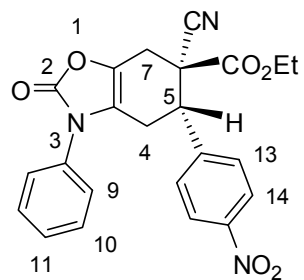**7d**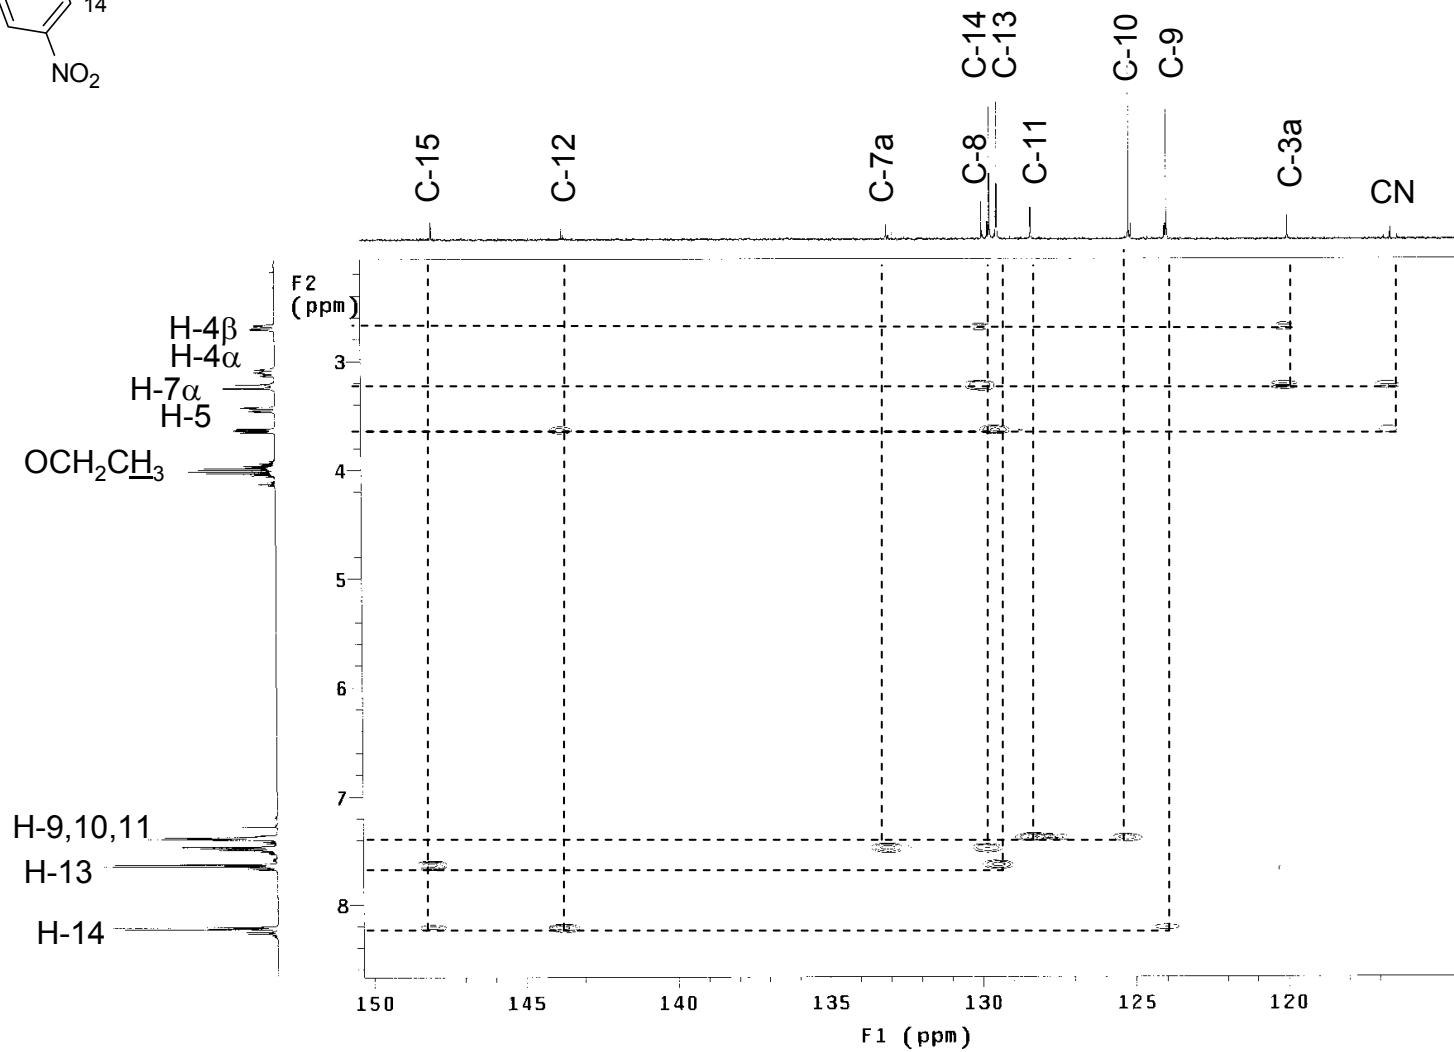HMBC experiment (CDCl<sub>3</sub>) **7d**

S23

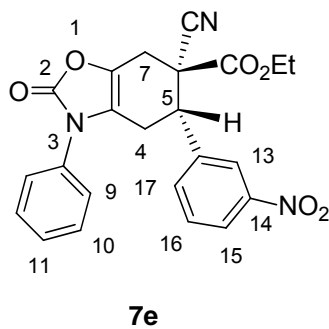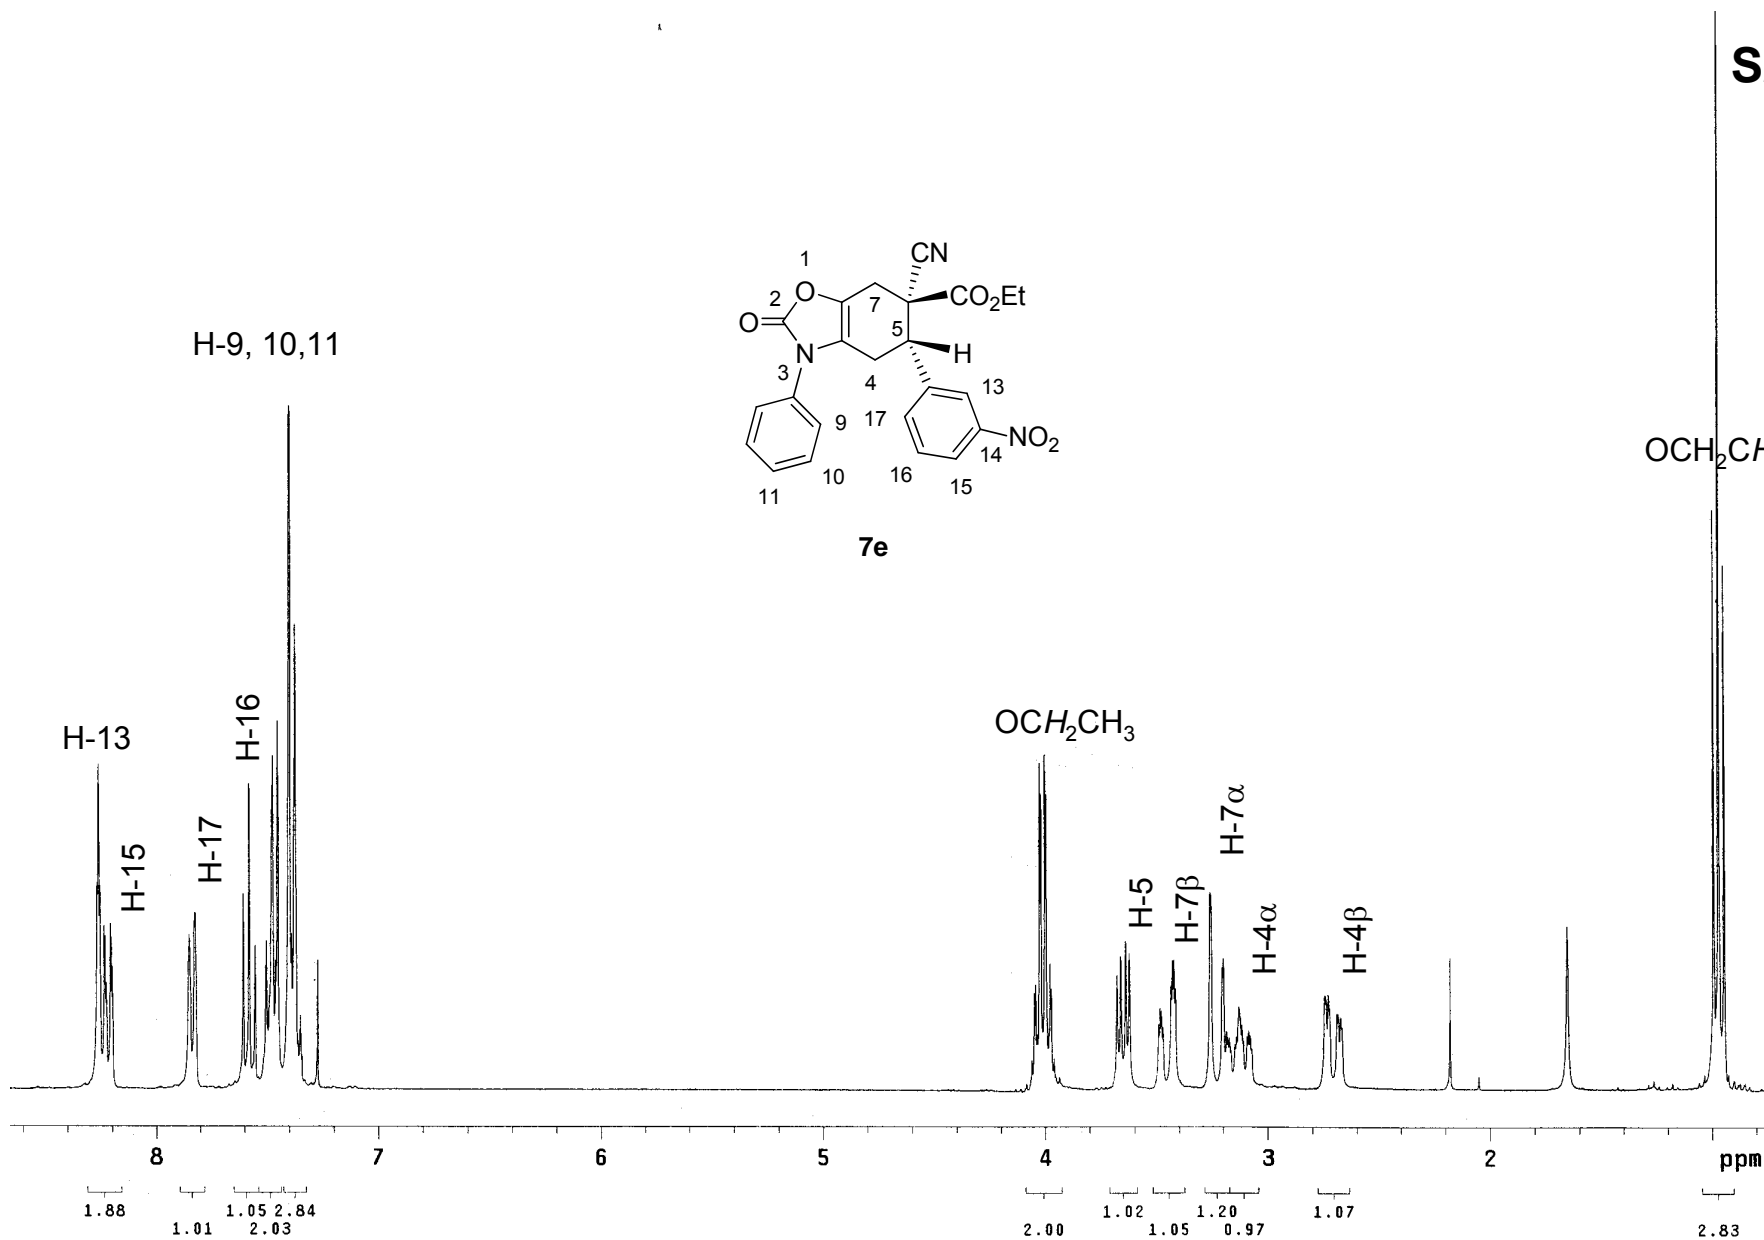

<sup>1</sup>H NMR (CDCl<sub>3</sub>) 7e



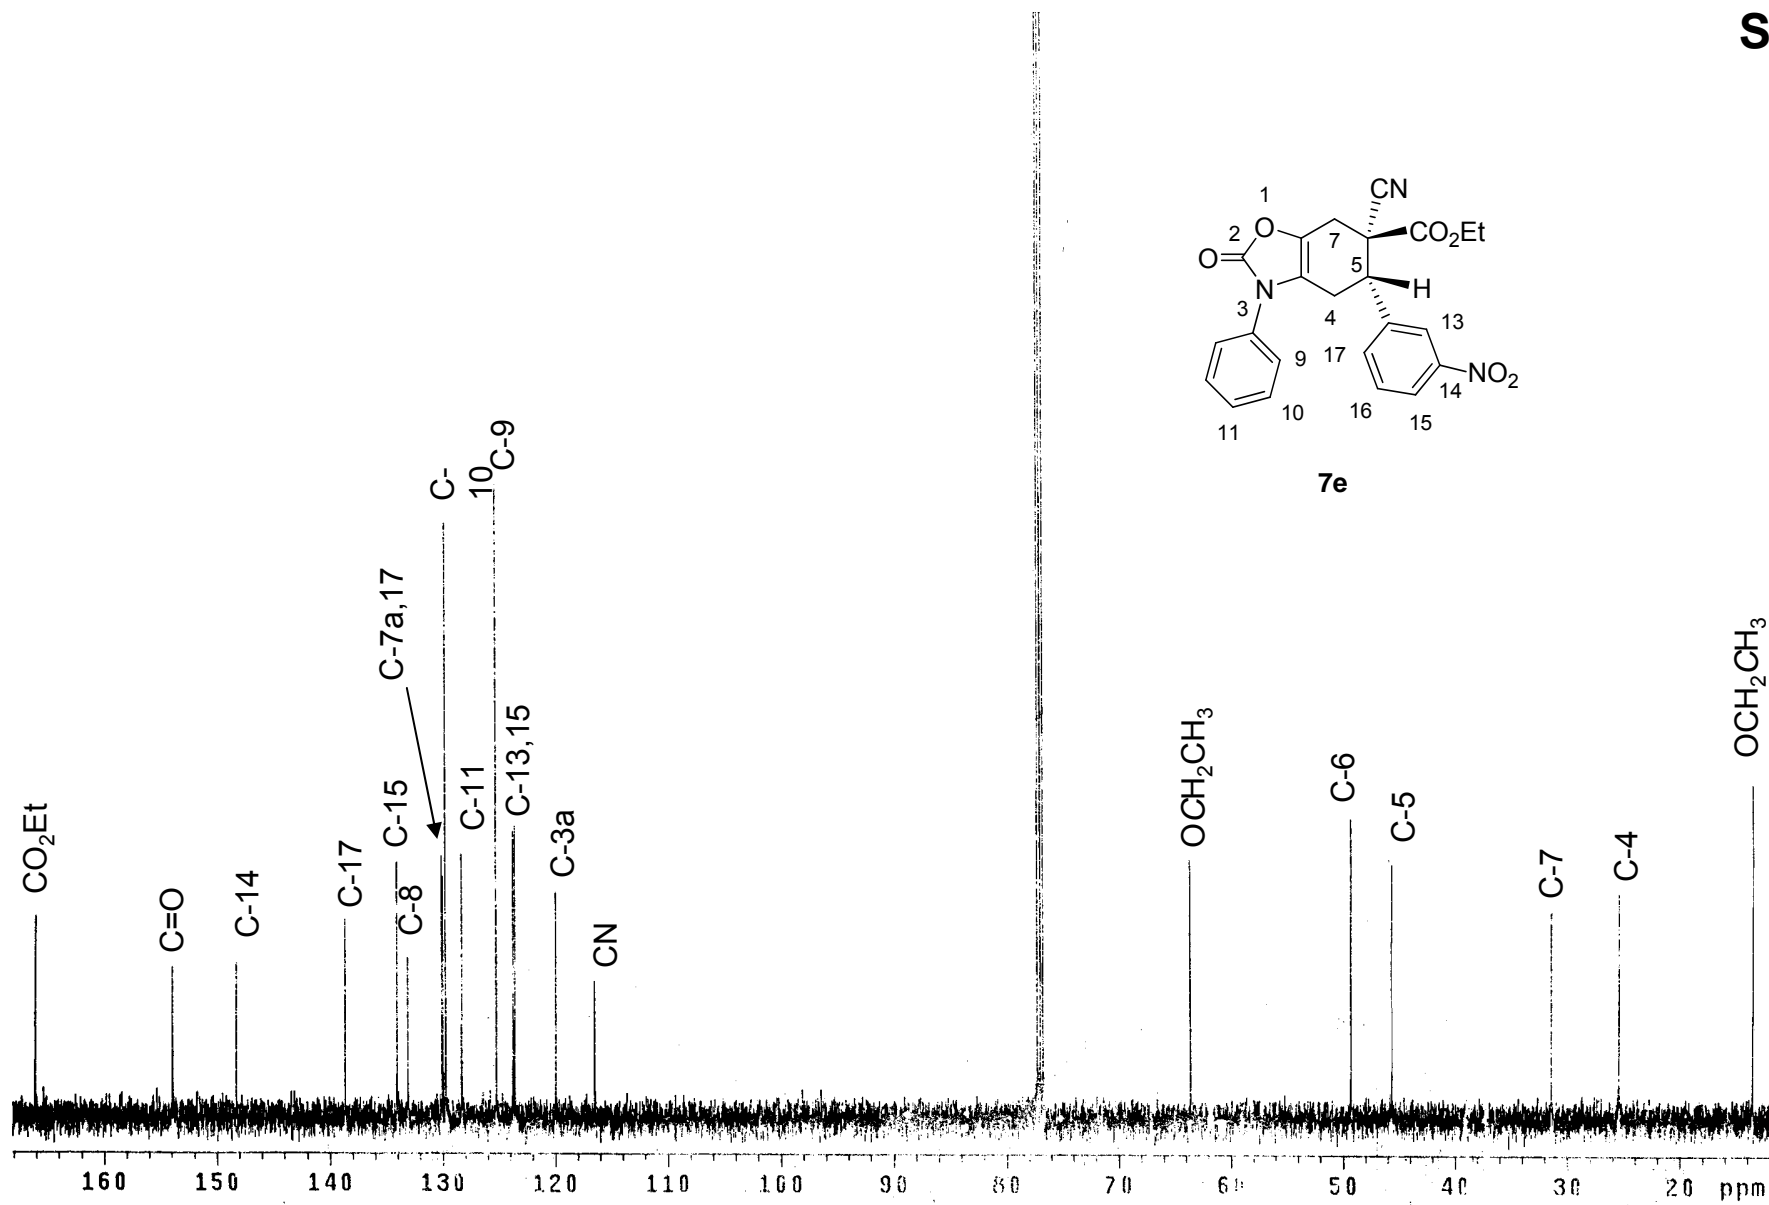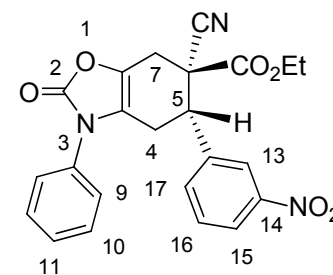**7e**

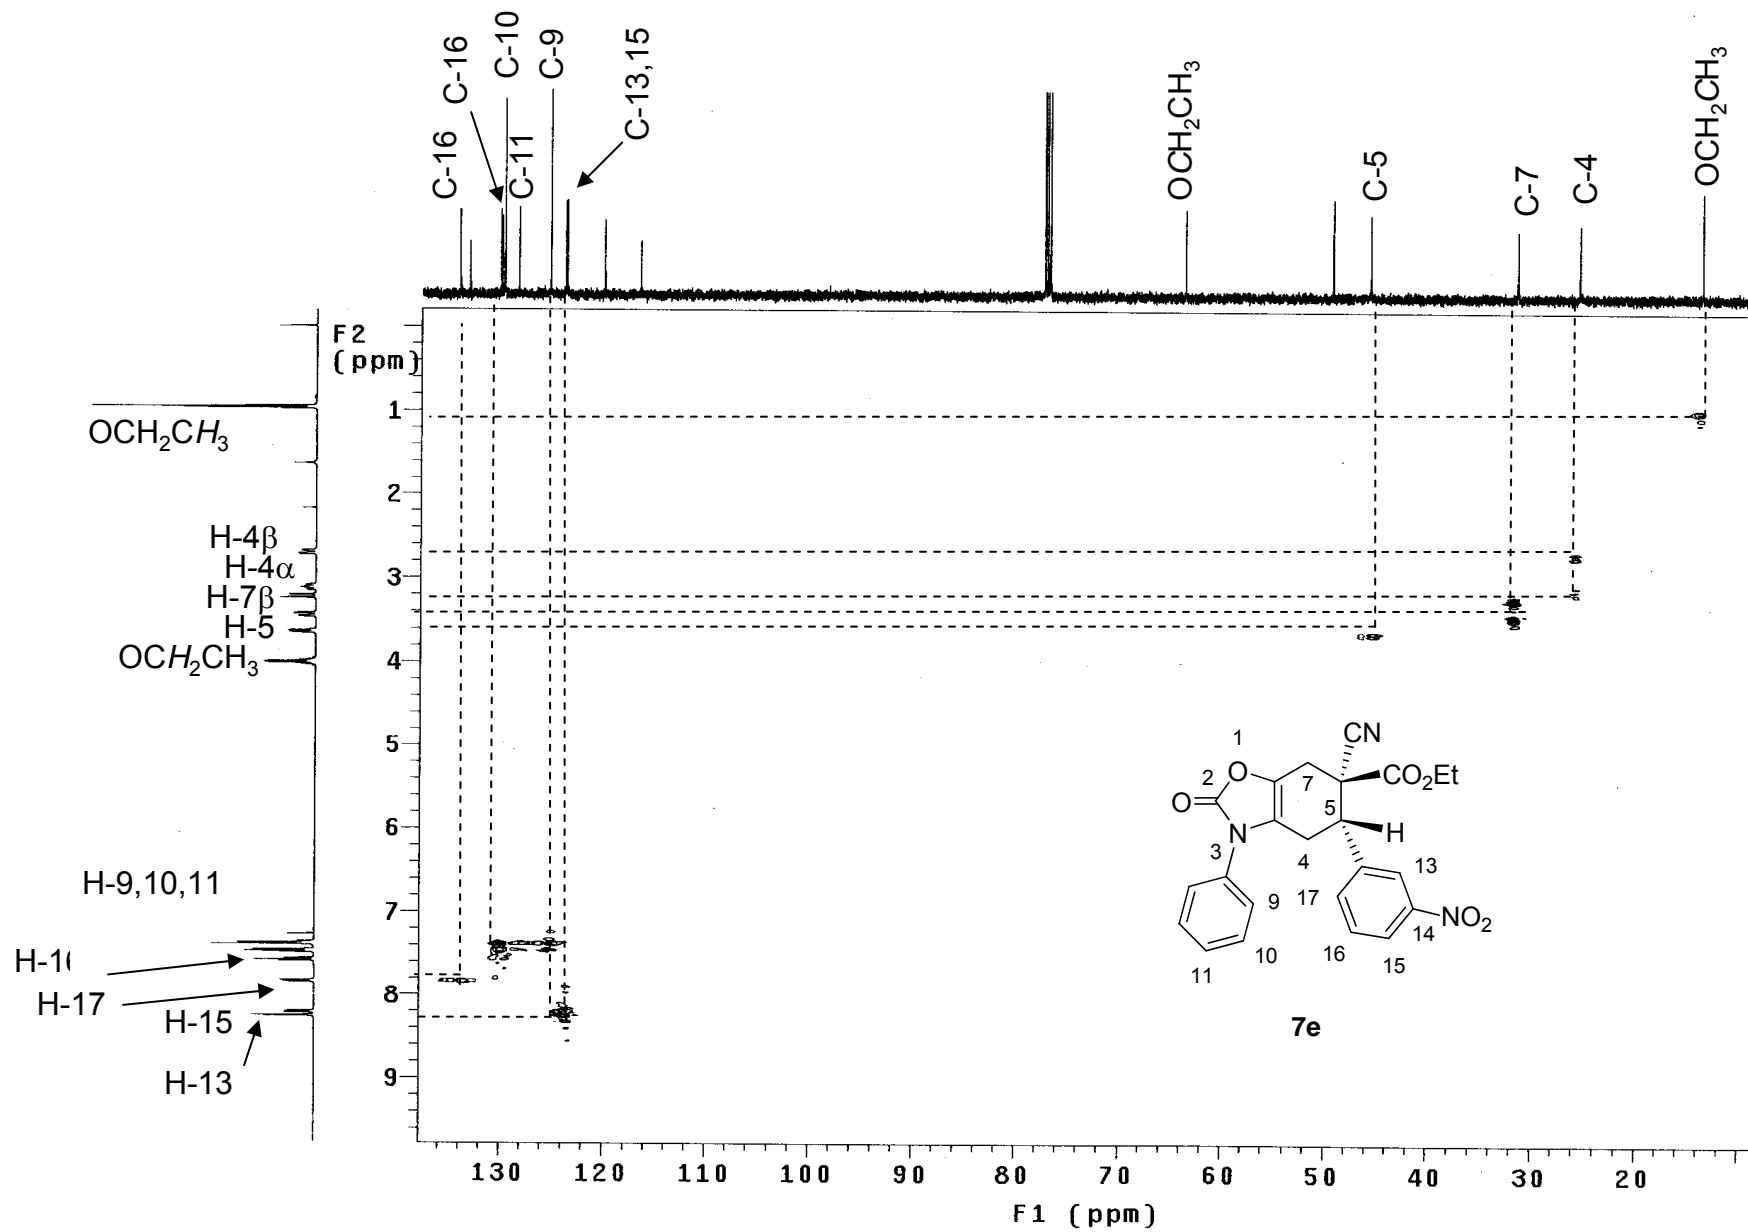HSQC experiment ( $\text{CDCl}_3$ ) **7e**

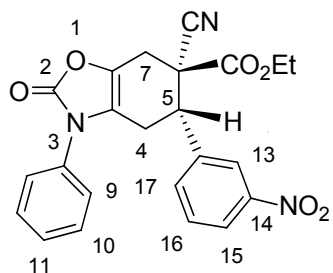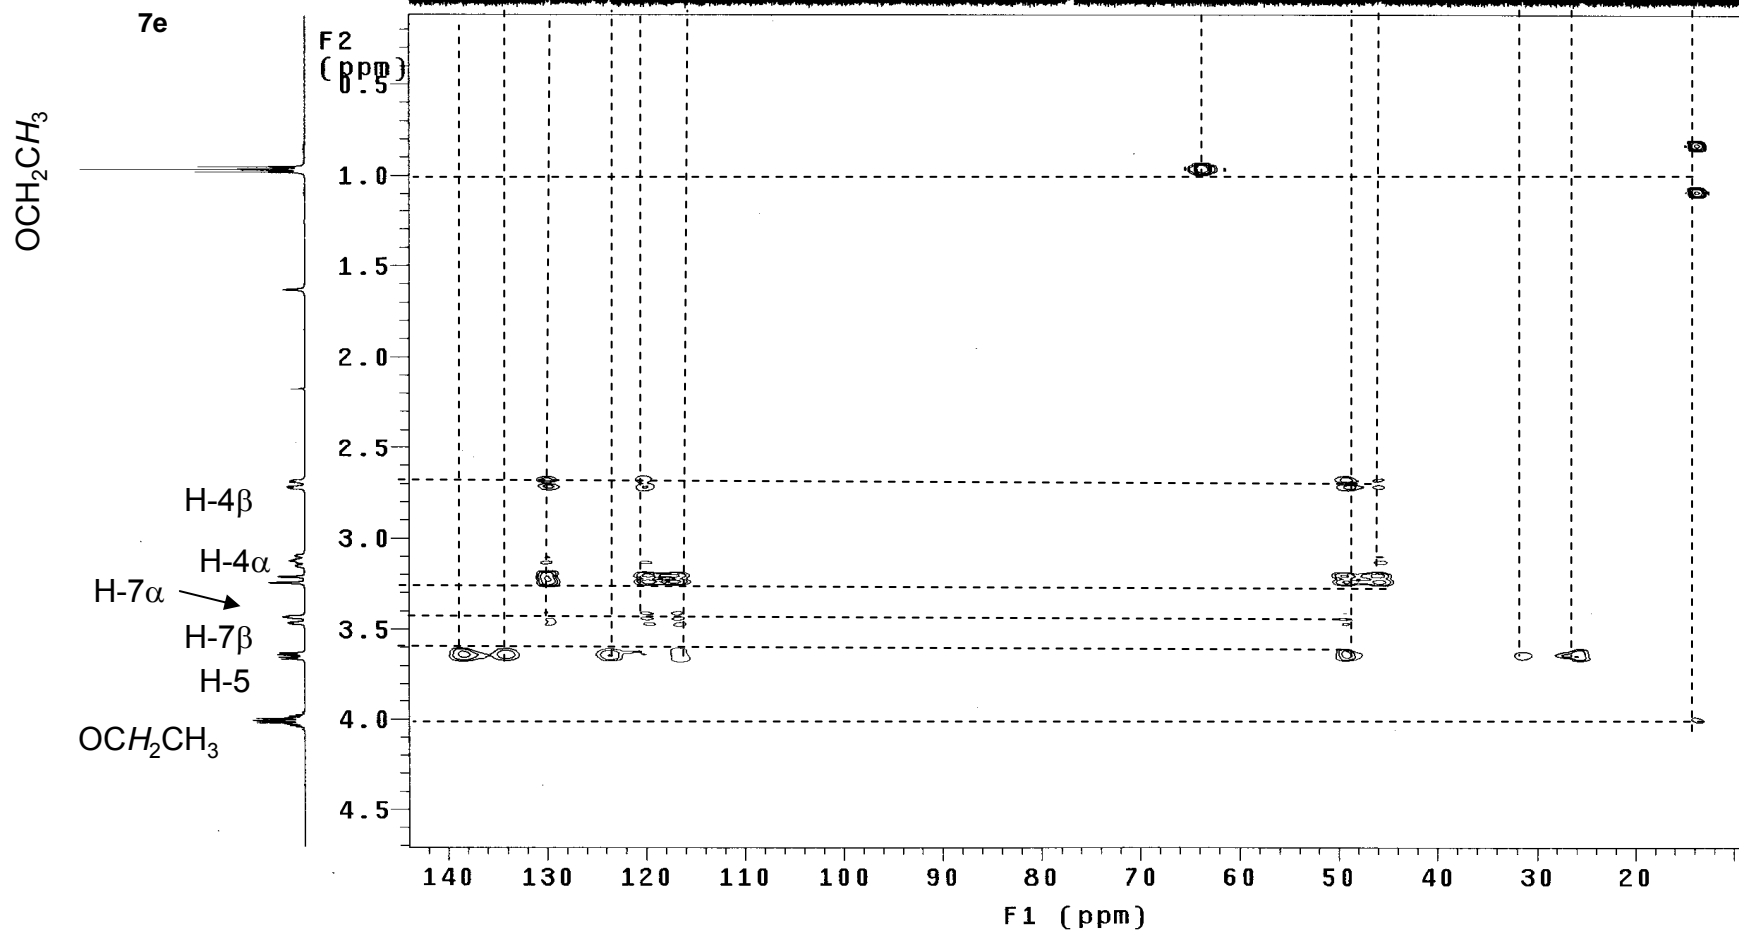

S26

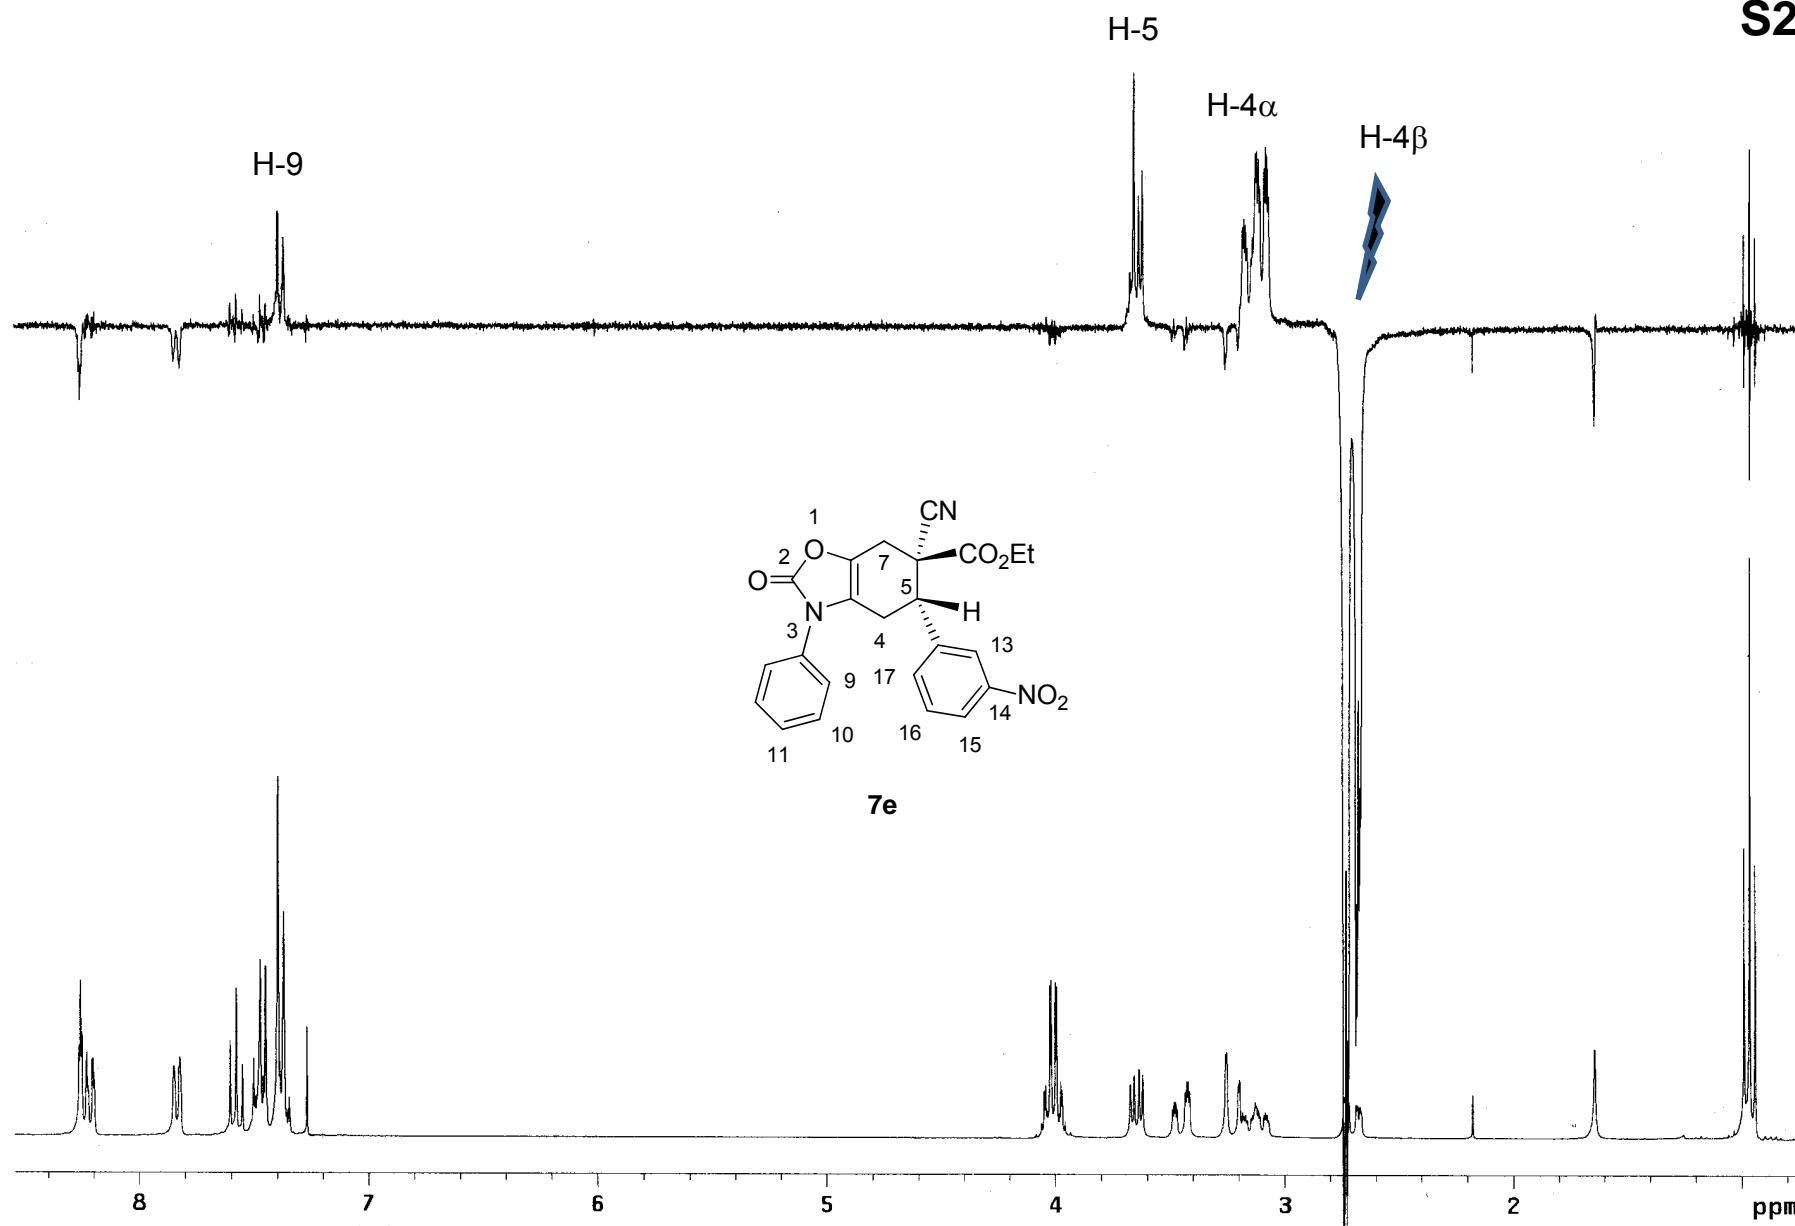

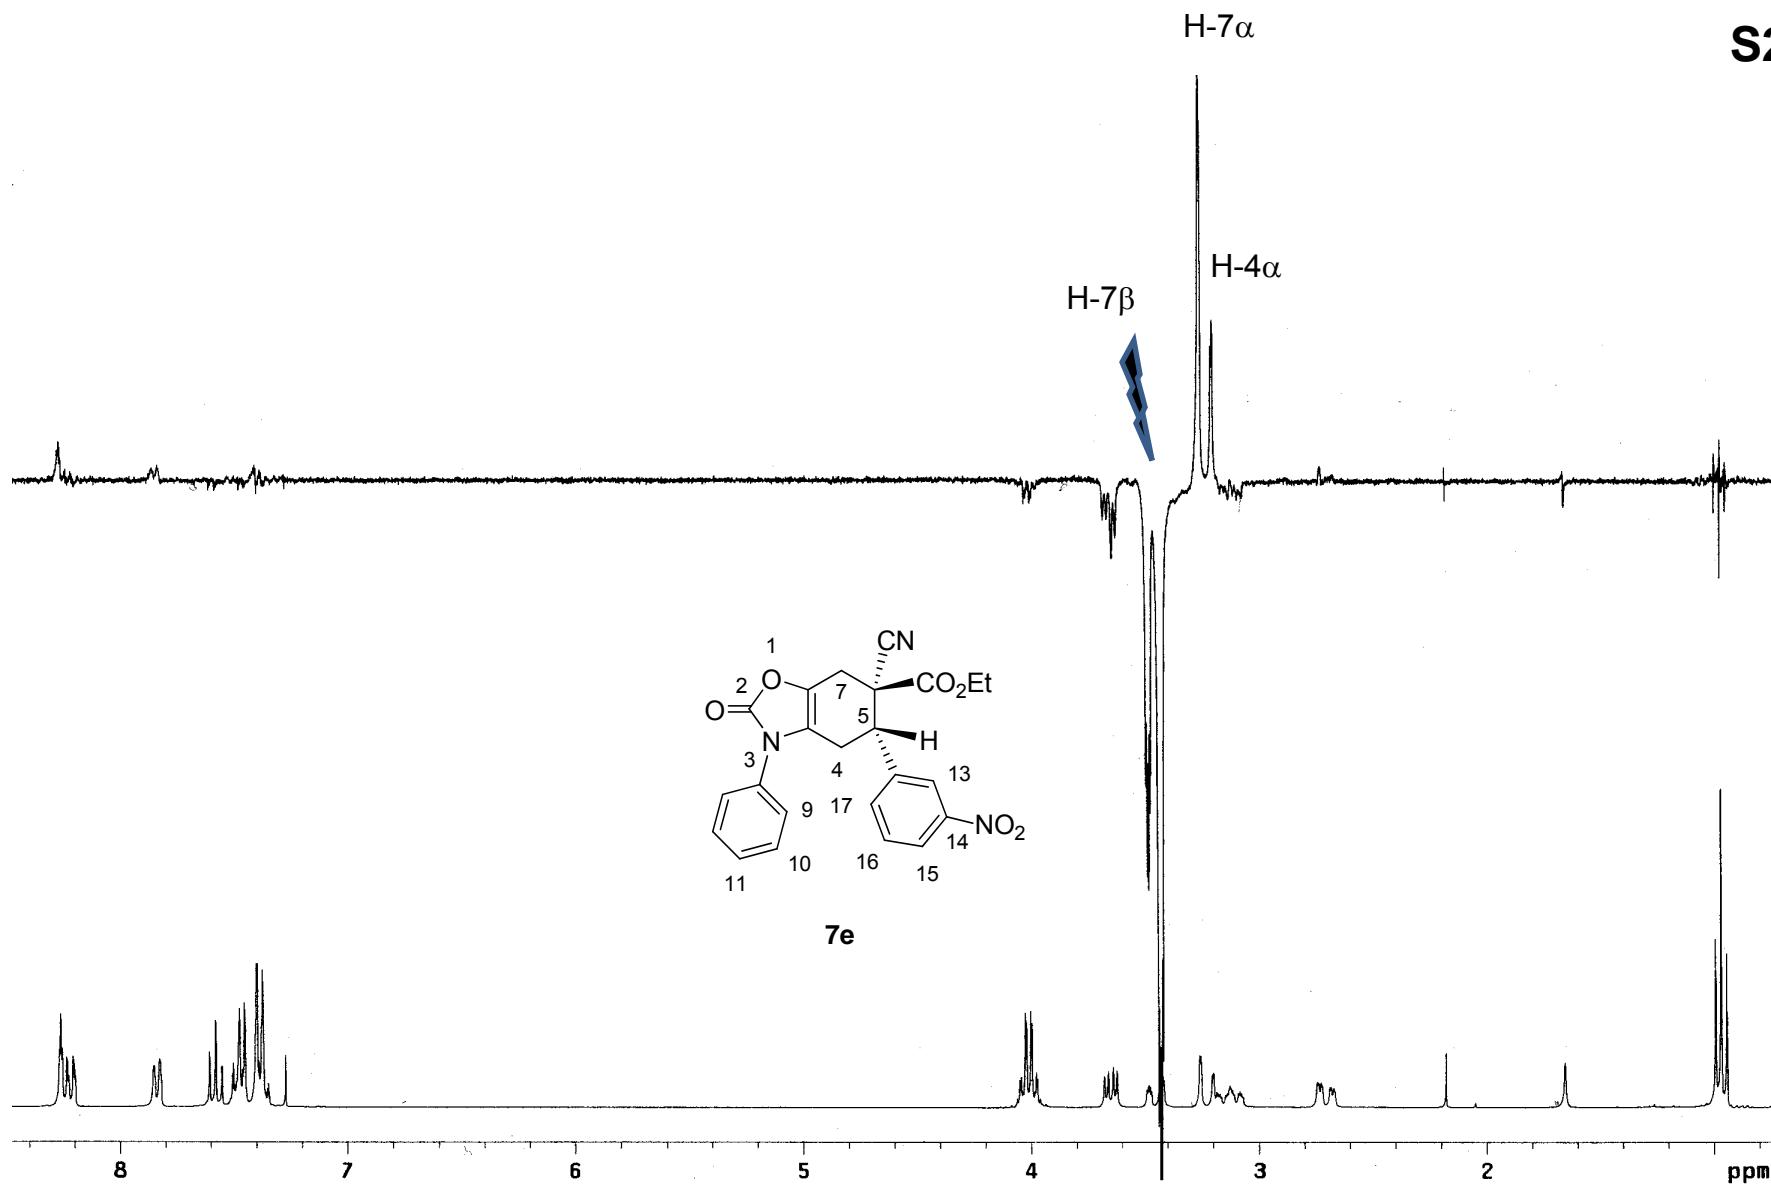

S29

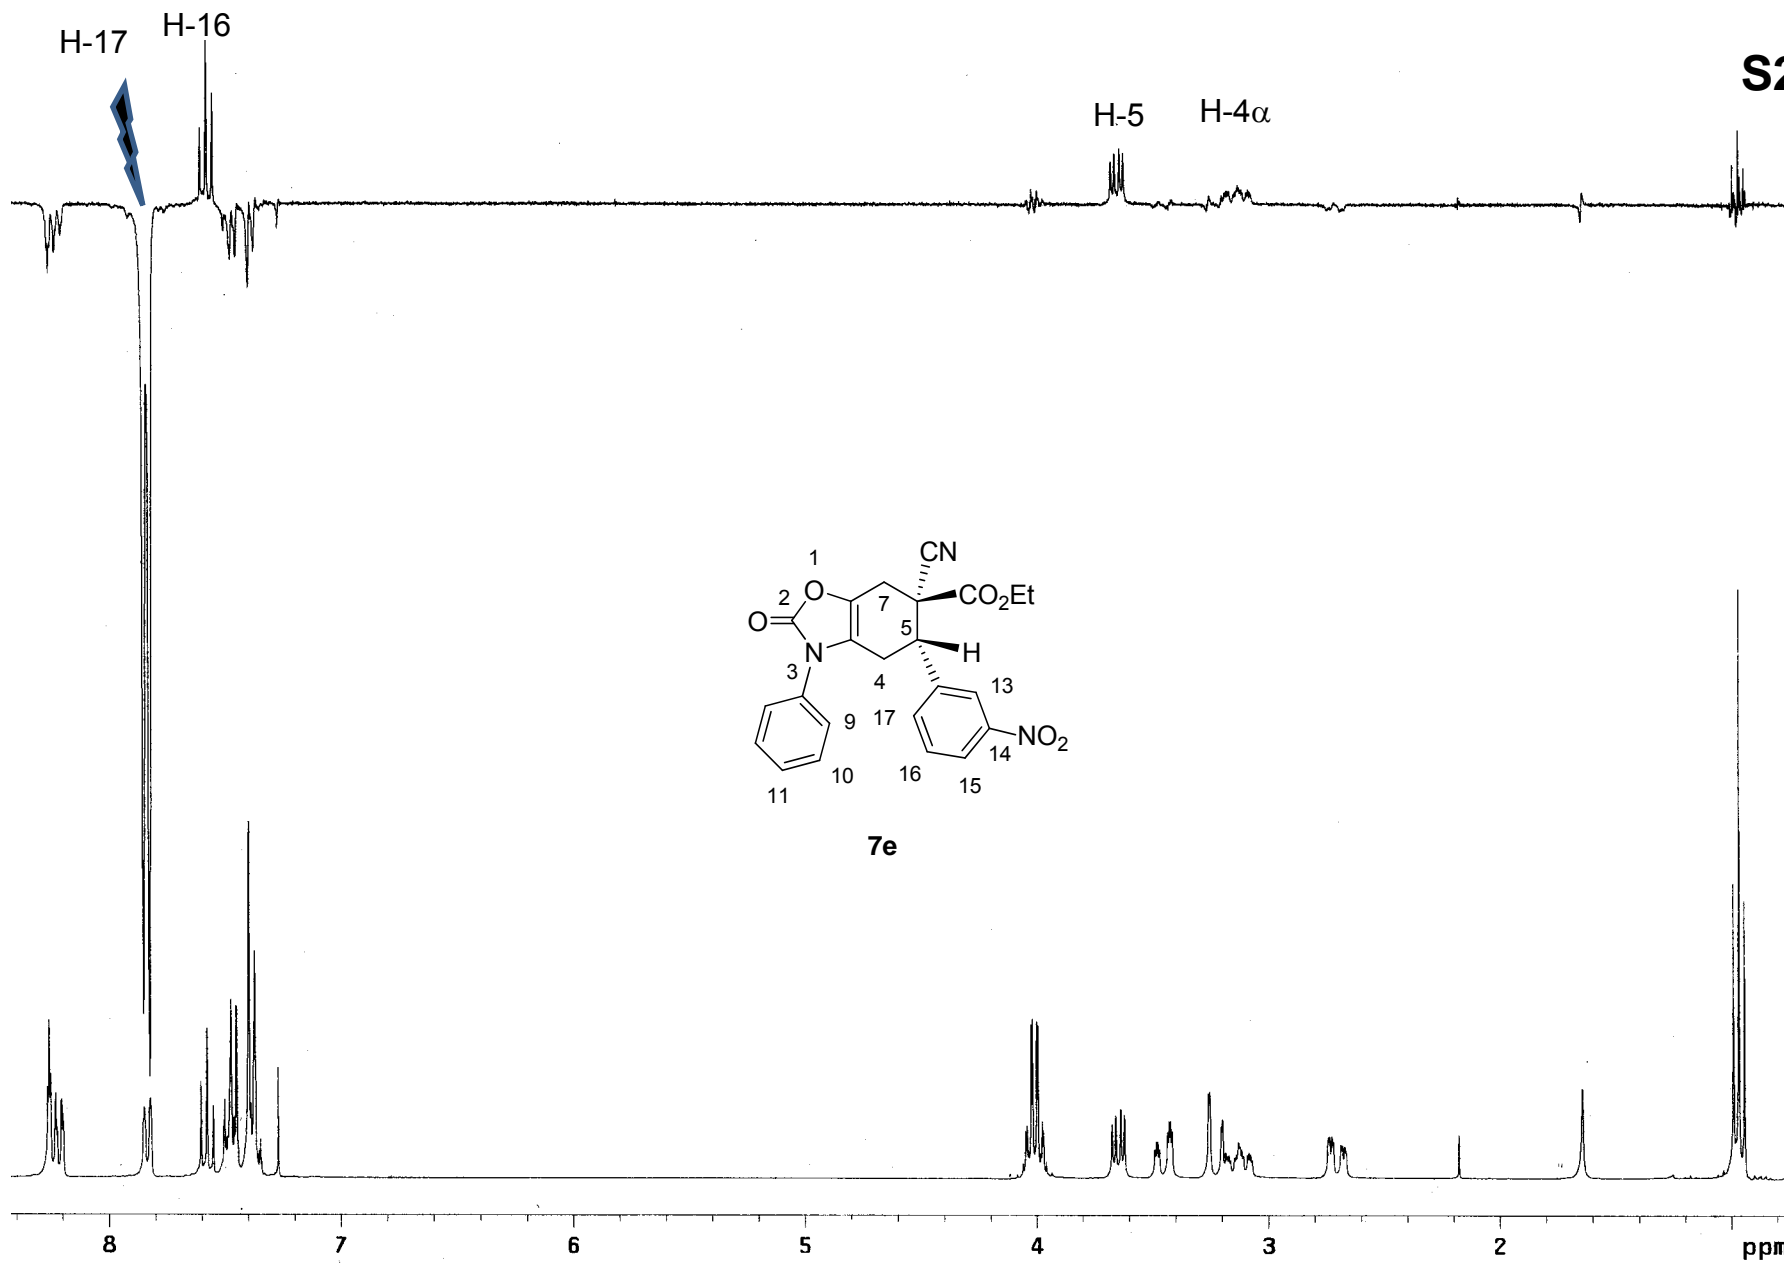

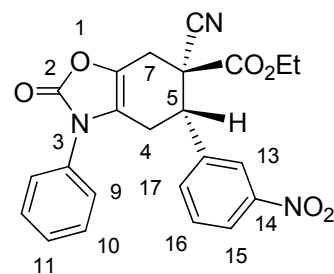**7e**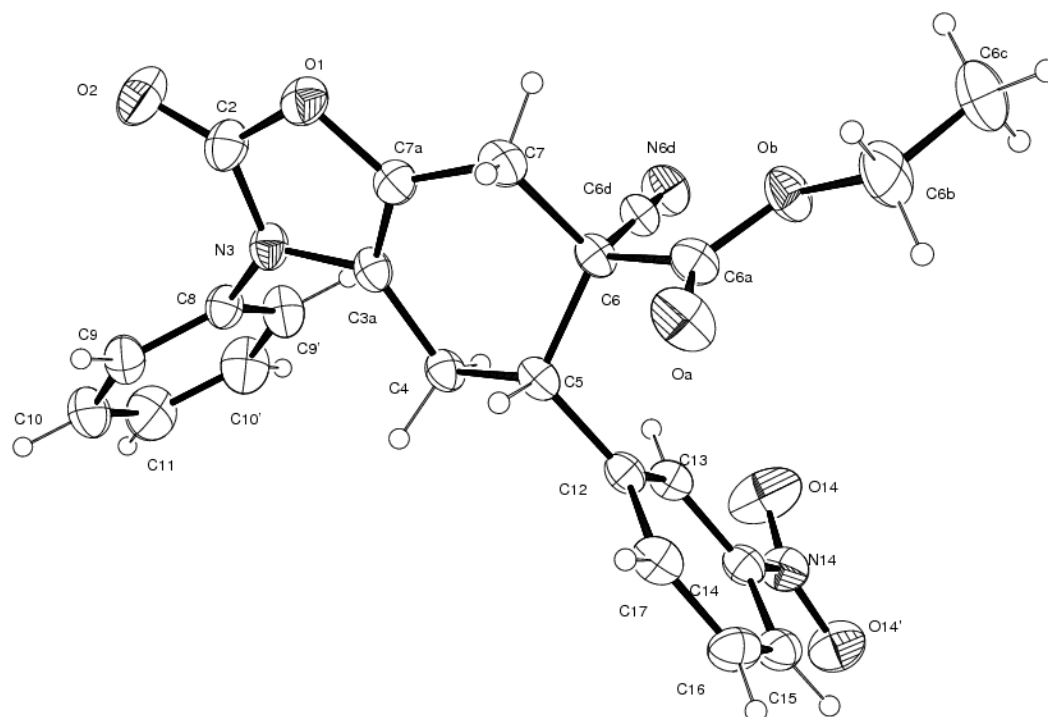X-Ray structure for **7e**

Table 1. Crystal data and structure refinement for adduct **7e**.

|                                 |                  |                                                               |
|---------------------------------|------------------|---------------------------------------------------------------|
| Identification code             |                  | 0010-fdr                                                      |
| Empirical formula               |                  | C <sub>23</sub> H <sub>19</sub> N <sub>3</sub> O <sub>6</sub> |
| Formula weight                  |                  | 433.41                                                        |
| Temperature                     |                  | 292(2) K                                                      |
| Wavelength                      |                  | 0.71073 Å                                                     |
| Unit cell dimensions            | a = 8.7852(4) Å  | α = 91.266(3)°                                                |
|                                 | b = 10.6923(3) Å | β = 99.236(3)°                                                |
|                                 | c = 12.0266(5) Å | γ = 109.440(3)°                                               |
| Volume                          |                  | 1048.03(7) Å <sup>3</sup>                                     |
| Z                               |                  | 2                                                             |
| Density (calculated)            |                  | 1.373 Mg/m <sup>3</sup>                                       |
| Absorption coefficient          |                  | 0.101 mm <sup>-1</sup>                                        |
| F(000)                          |                  | 452                                                           |
| Crystal size                    |                  | 0.22 x 0.15 x 0.13 mm <sup>3</sup>                            |
| Theta range for data collection |                  | 2.50 to 32.54°                                                |
| Index ranges                    |                  | -13 ≤ h ≤ 13, -15 ≤ k ≤ 16, -18 ≤ l ≤ 17                      |
| Reflections collected           |                  | 14935                                                         |
| Independent reflections         |                  | 6788 [R(int) = 0.0283]                                        |
| Completeness to theta = 27.50°  |                  | 99.1 %                                                        |
| Max. and min. transmission      |                  | 0.9870 and 0.9781                                             |



|                                      |                                    |
|--------------------------------------|------------------------------------|
| Refinement method                    | Full-matrix least-squares on $F^2$ |
| Data / restraints / parameters       | 6788 / 0 / 290                     |
| Goodness-of-fit on $F^2$             | 1.003                              |
| Final R indices [ $I > 2\sigma(I)$ ] | R1 = 0.0522, wR2 = 0.1262          |
| R indices (all data)                 | R1 = 0.1046, wR2 = 0.1460          |
| Largest diff. peak and hole          | 0.270 and -0.254 e.Å <sup>-3</sup> |

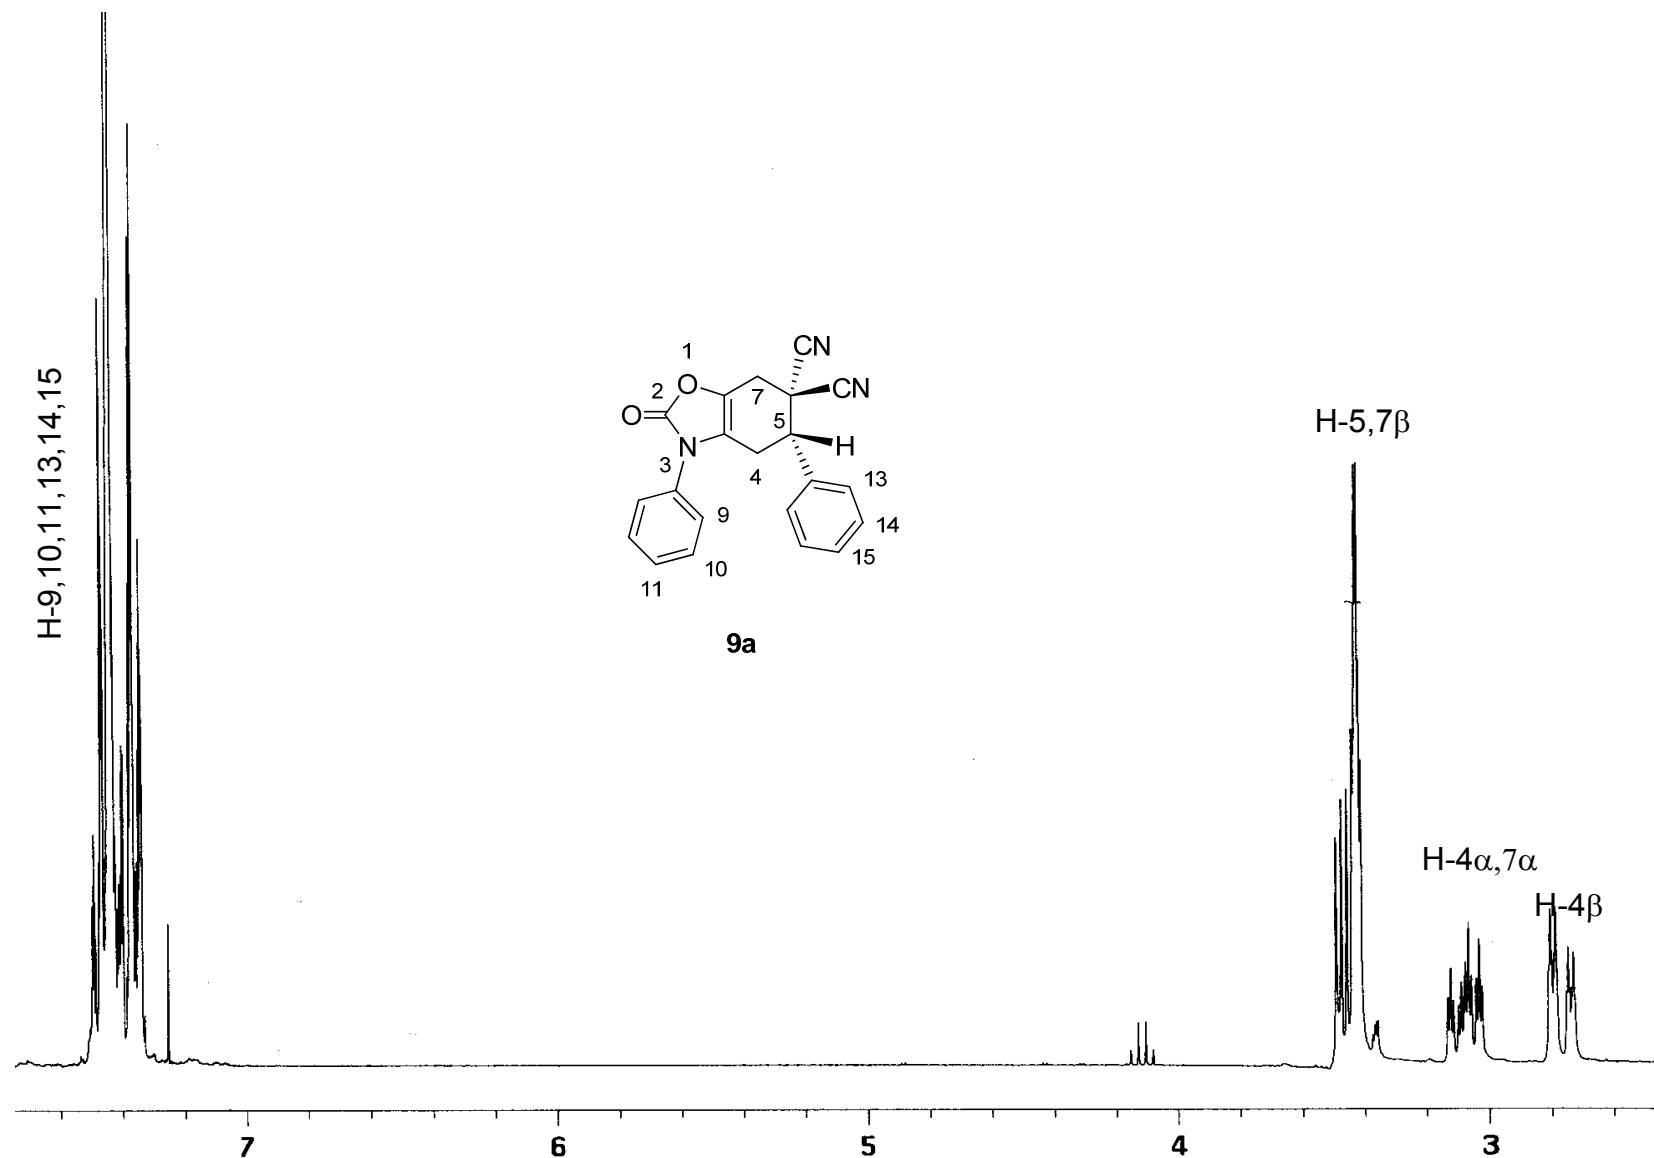

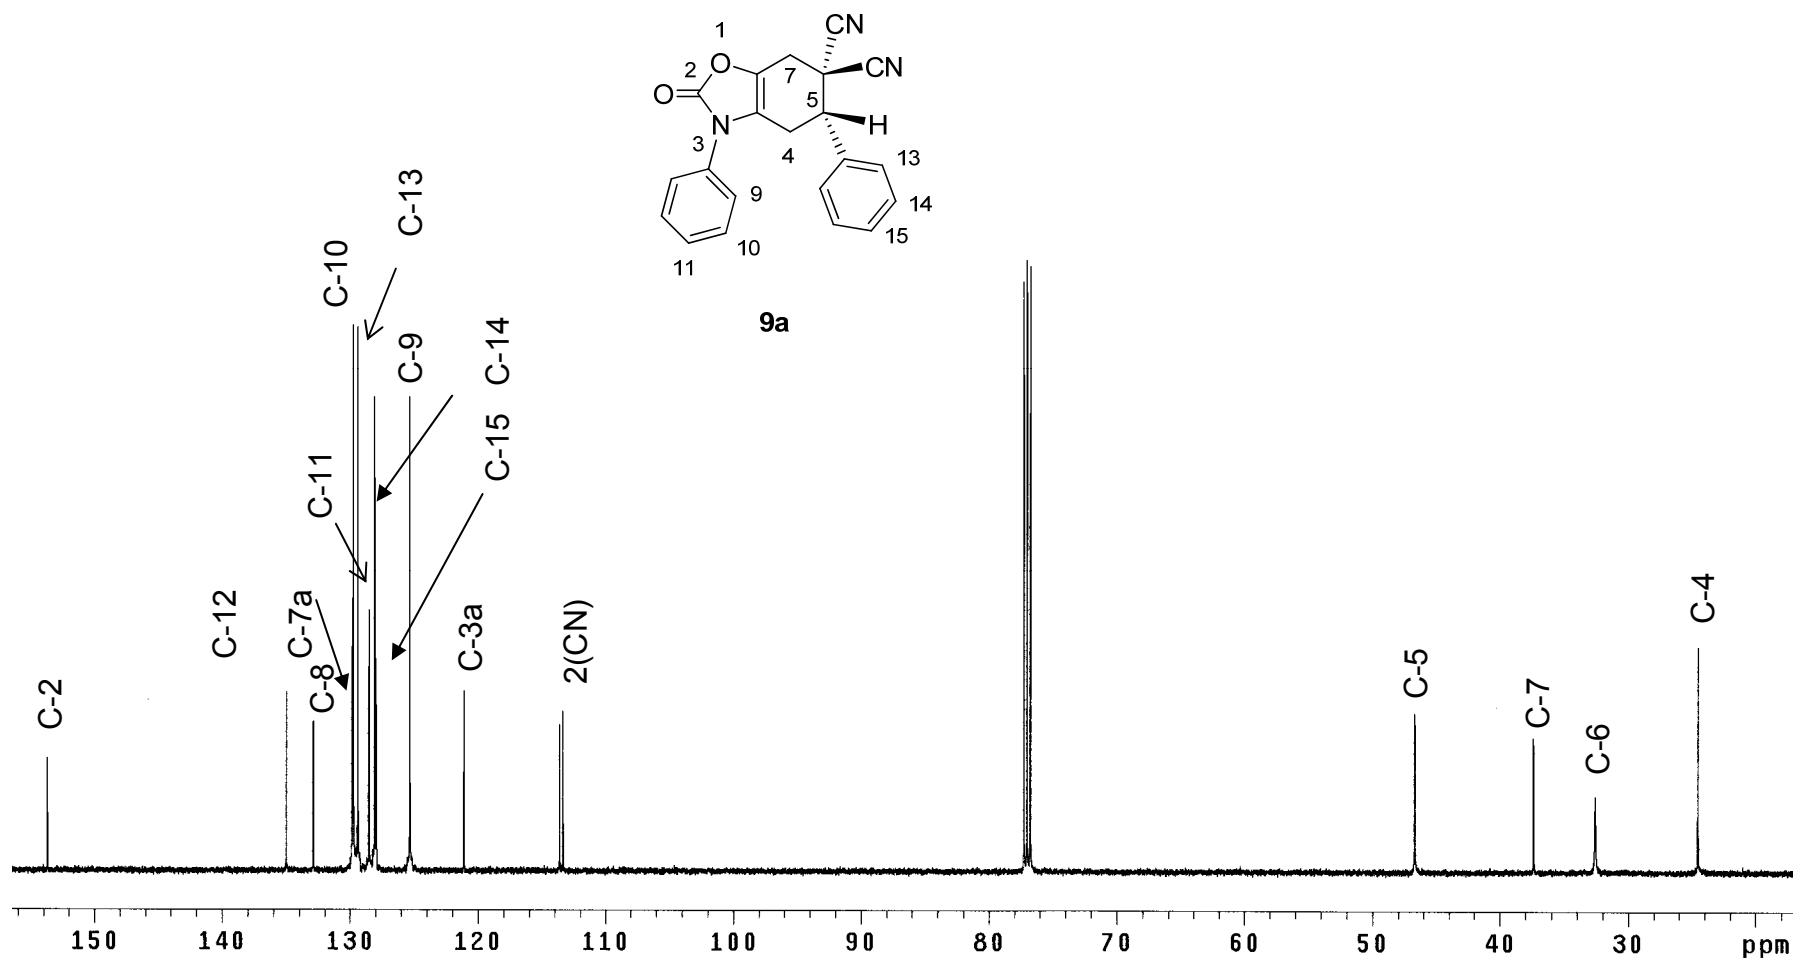

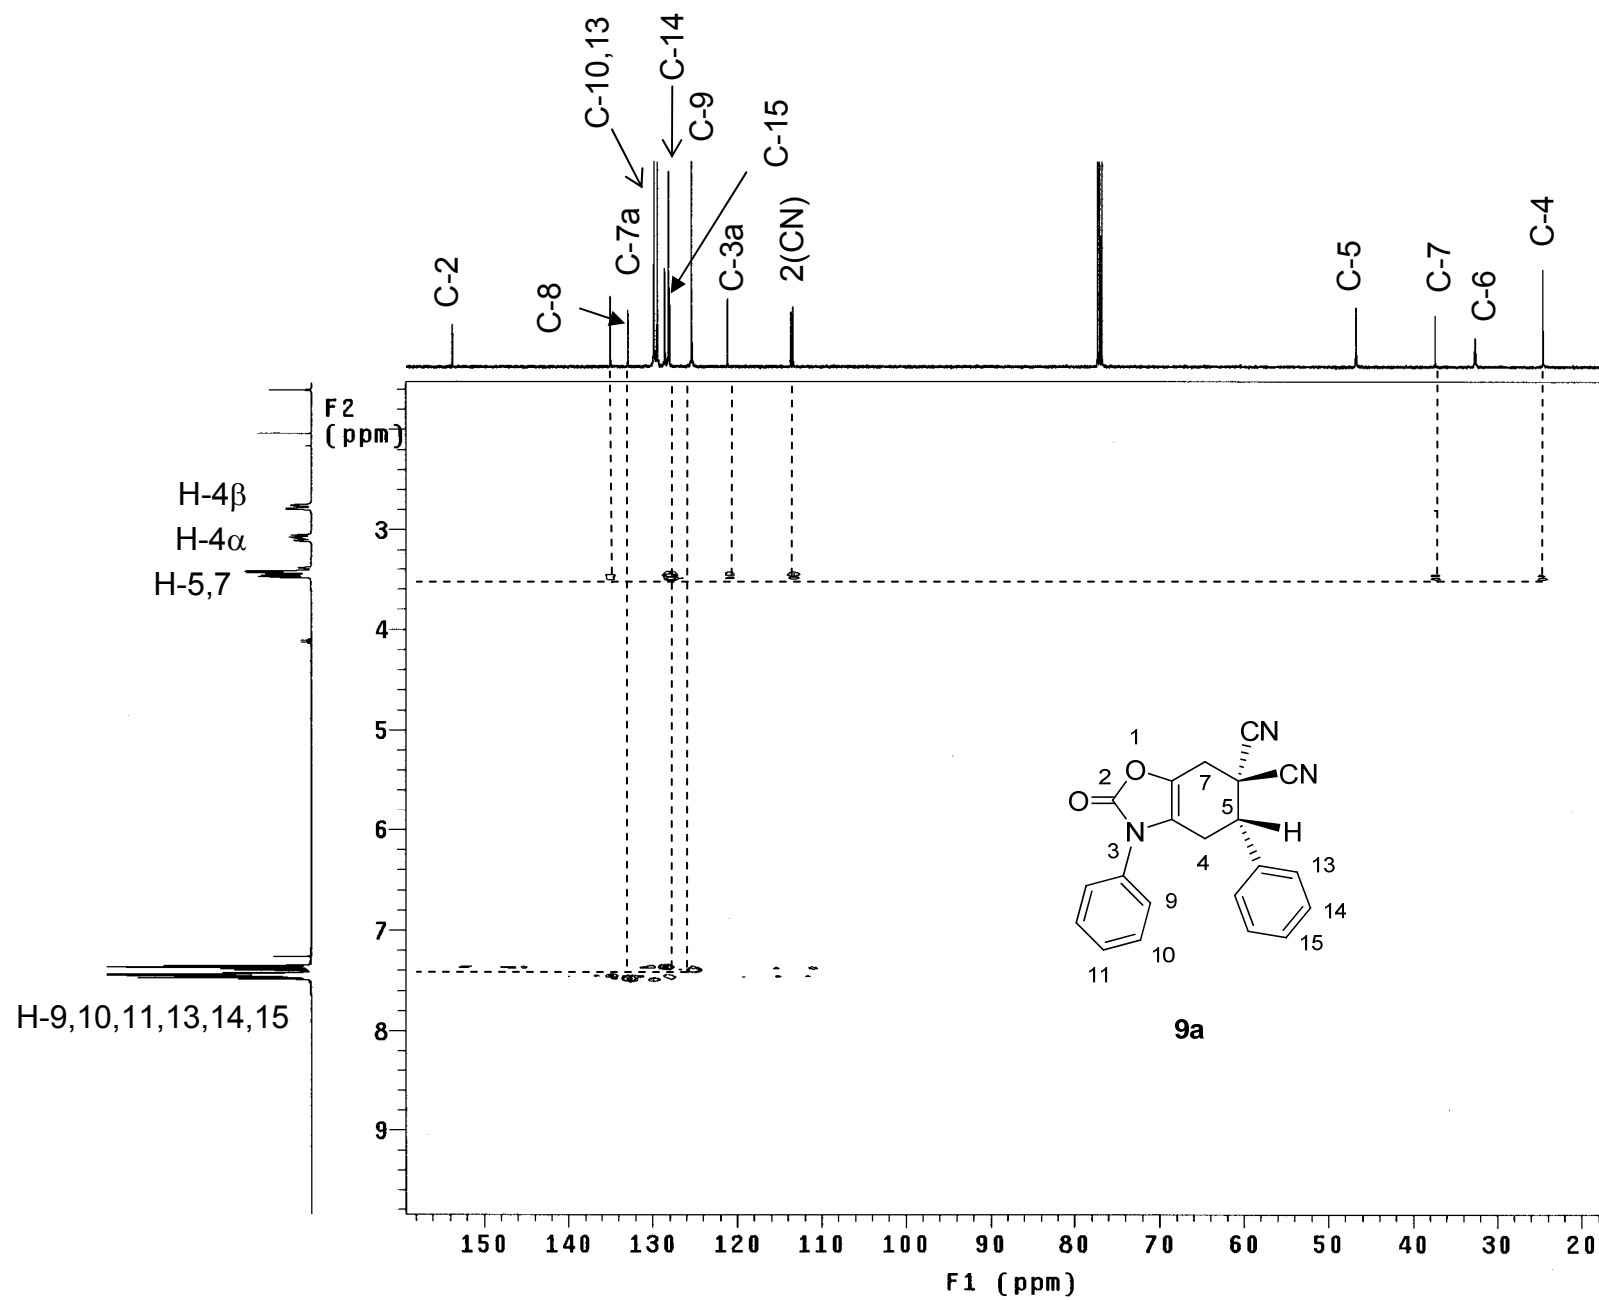

S36

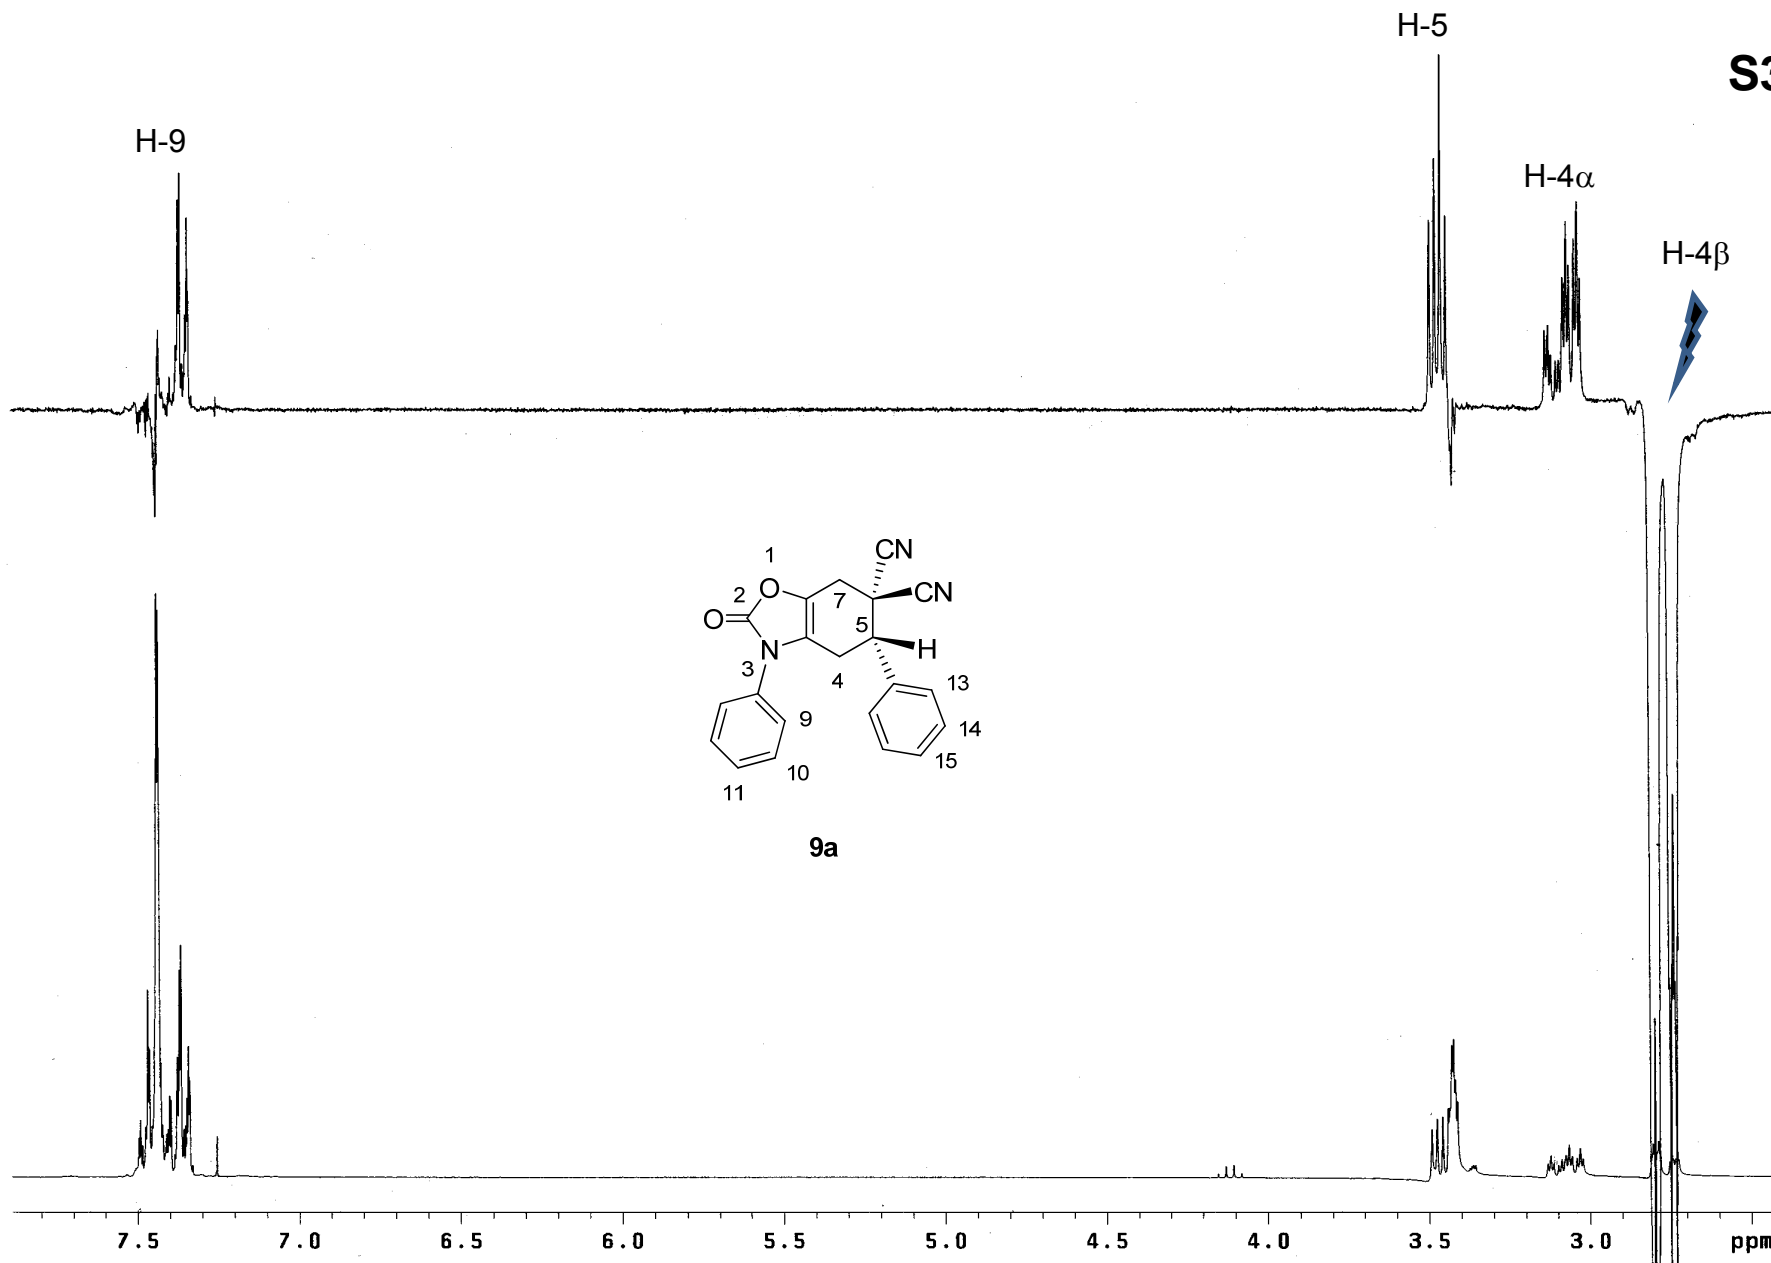

NOE experiment (CDCl<sub>3</sub>) **9a**

H-9,13

H-4 $\alpha$ H-4 $\beta$ 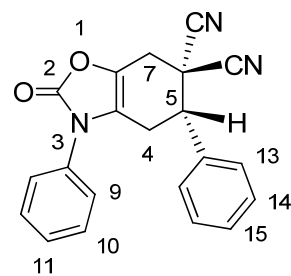**9a**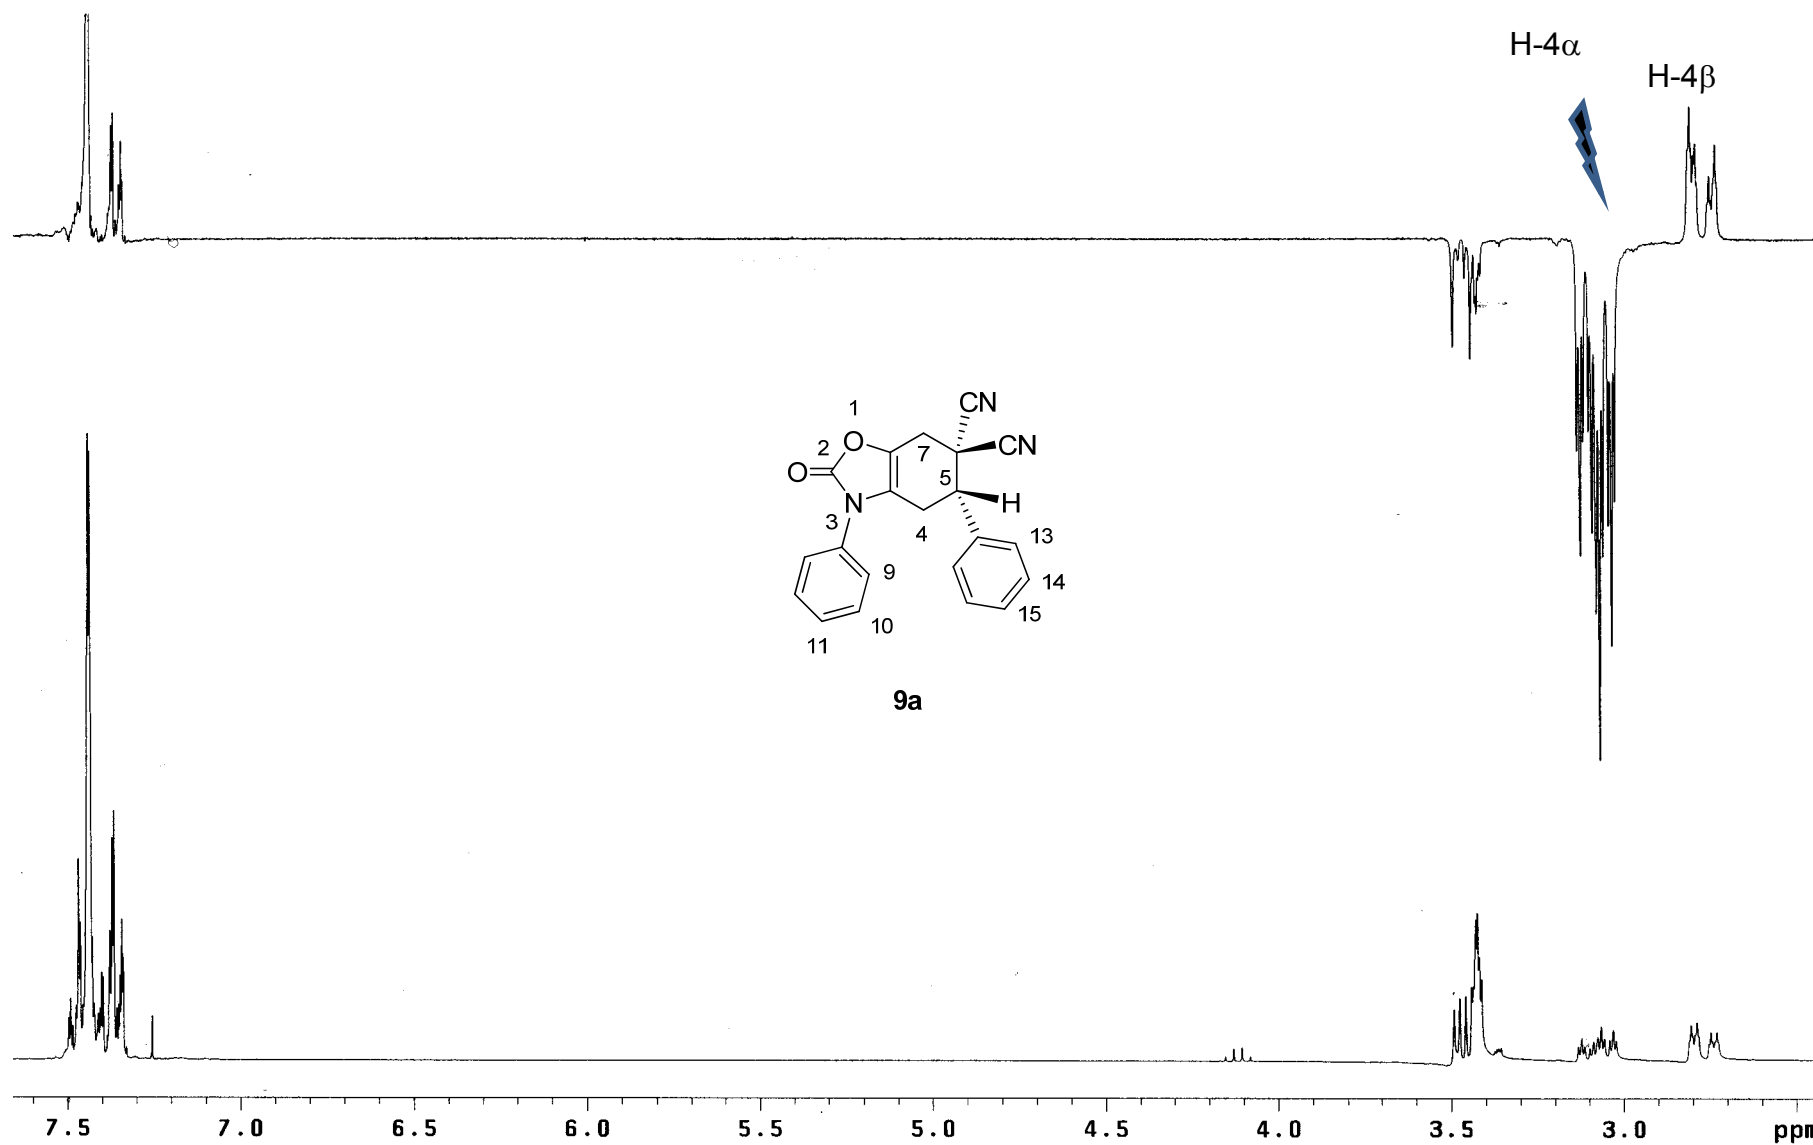NOE experiment (CDCl<sub>3</sub>) **9a**

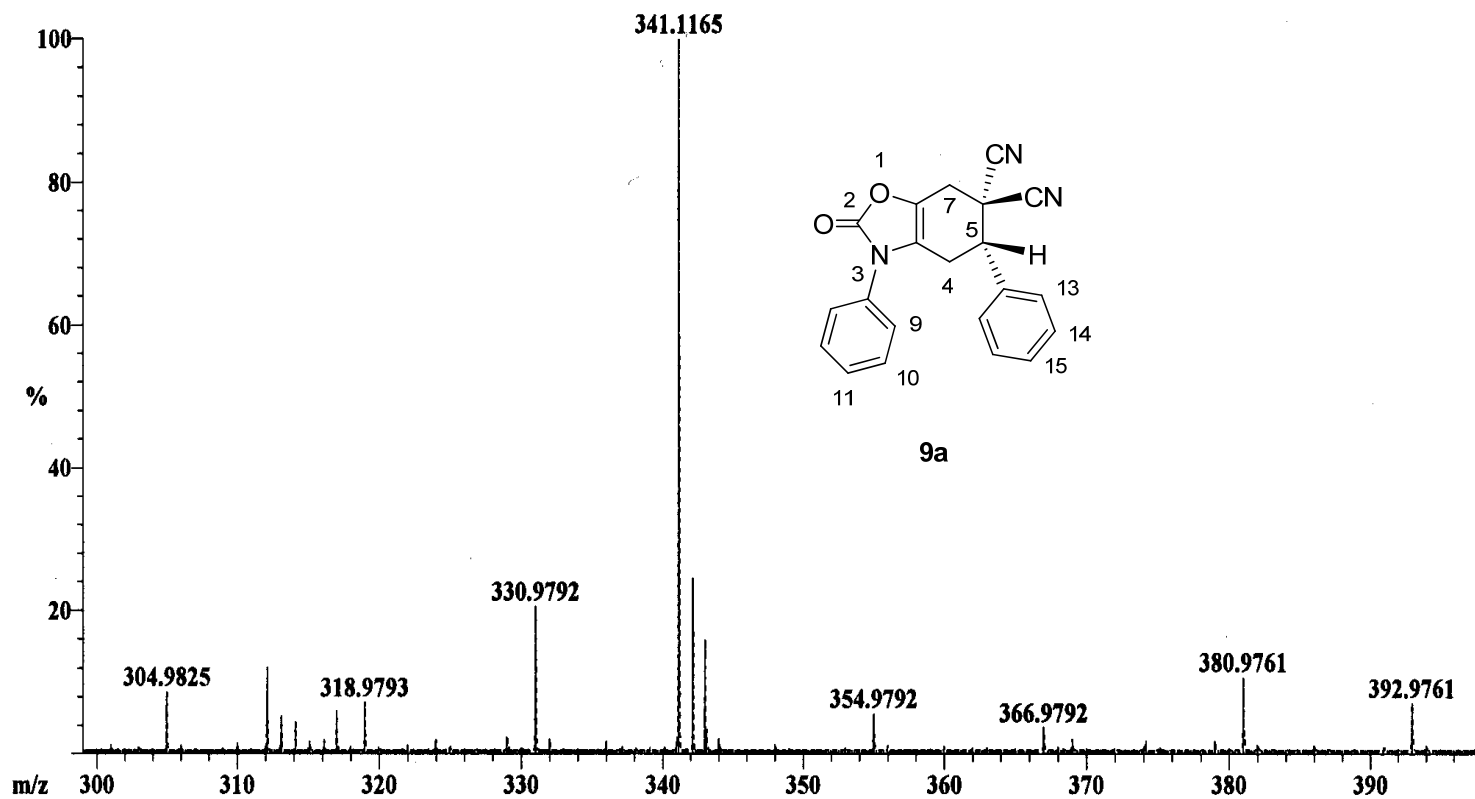

Selected Isotopes :  $N_{0-3} C_{0-21} H_{0-15} O_{0-2}$

Error Limit : 20 mmu

| <u>Measured Mass</u> | <u>% Base</u> | <u>Formula</u>       | <u>Calculated Mass</u> | <u>Error</u> |
|----------------------|---------------|----------------------|------------------------|--------------|
| 341.1165             | 100.0%        | $C_{21}H_{15}N_3O_2$ | 341.1164               | 0.1          |

HRMS 9a

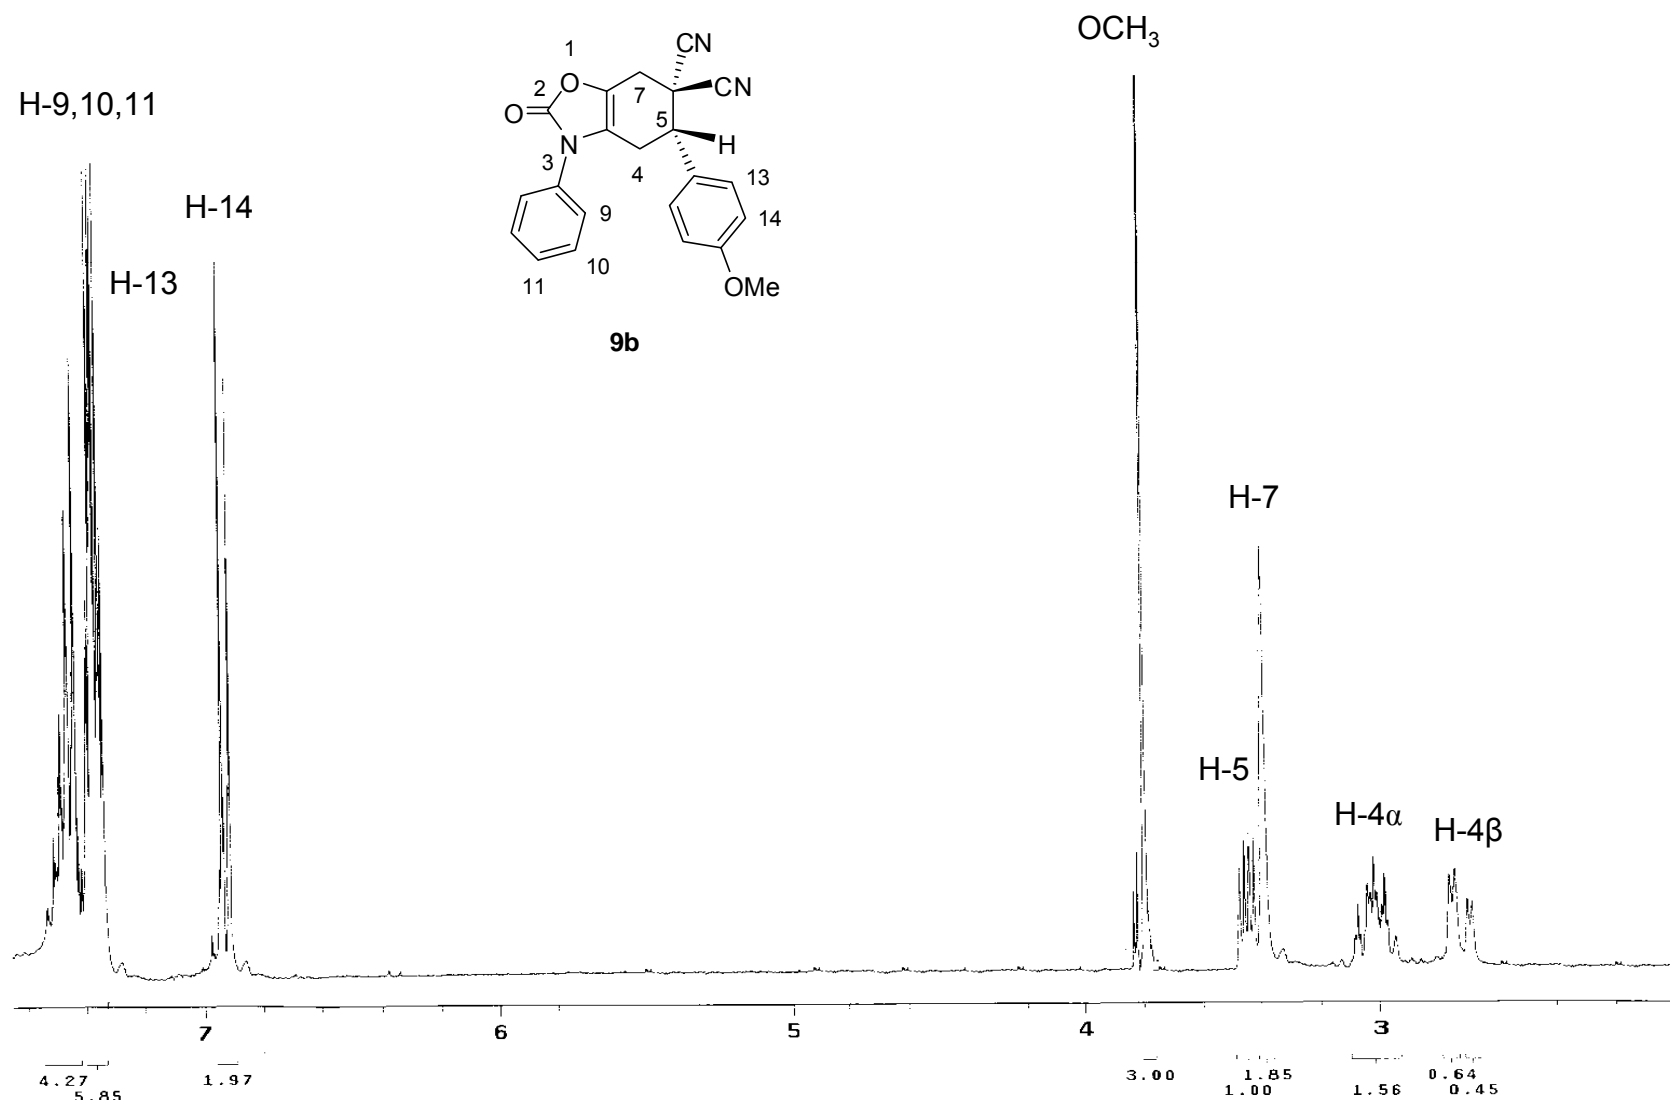

**1H NMR (CDCl<sub>3</sub>) 9b**



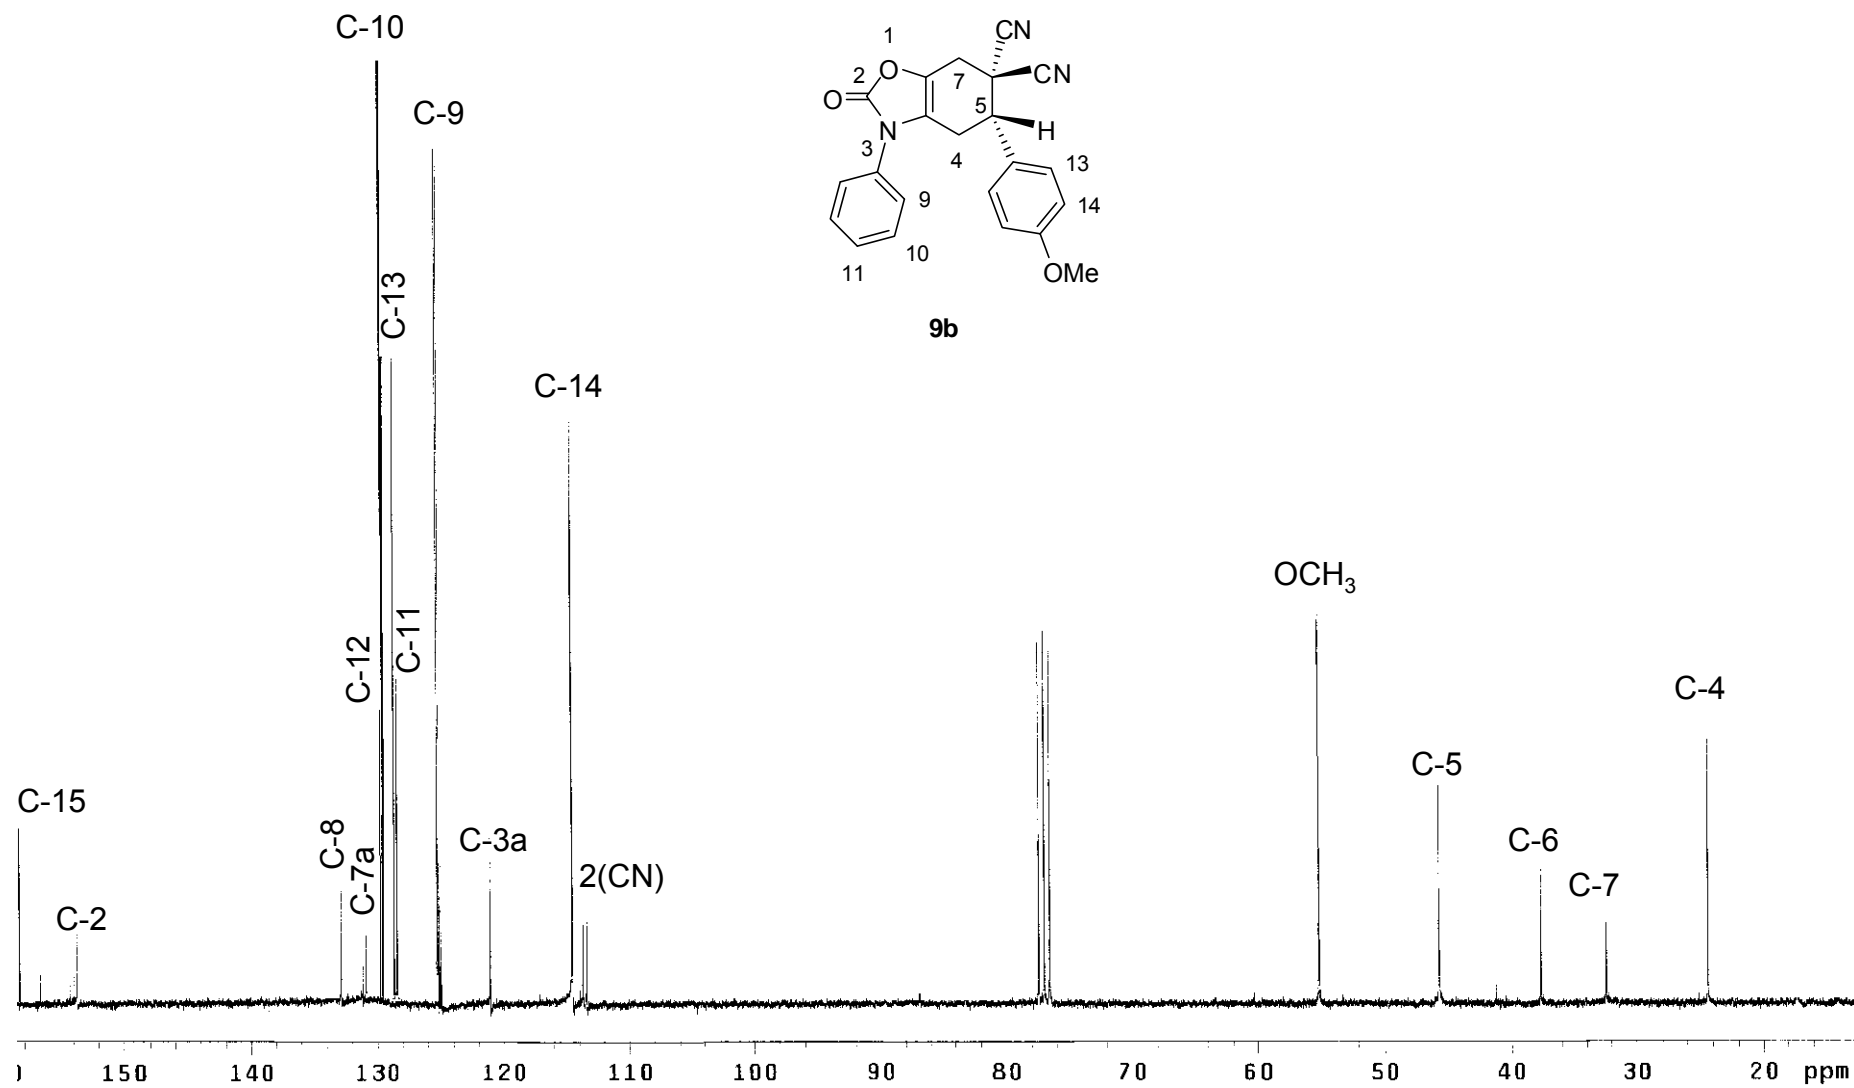

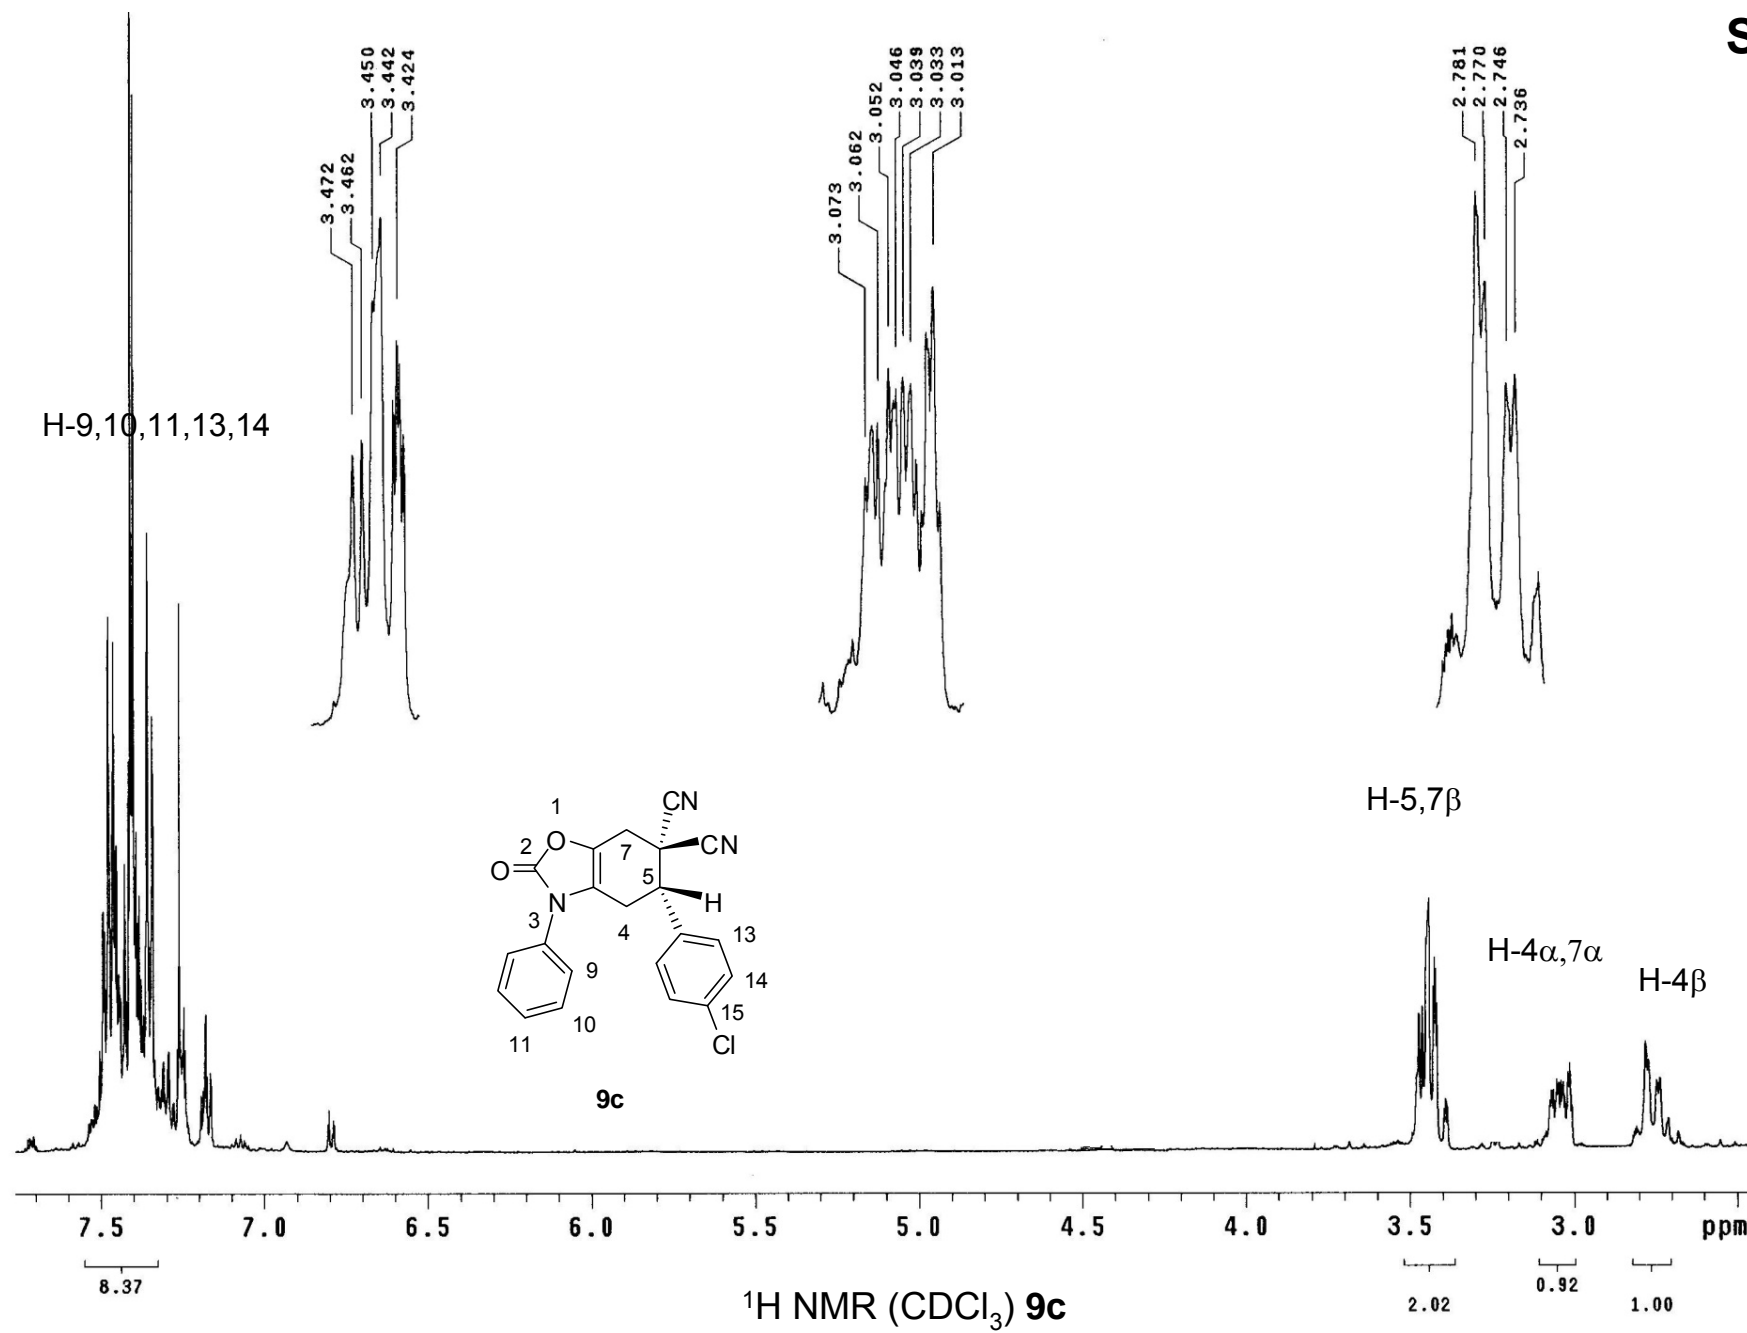

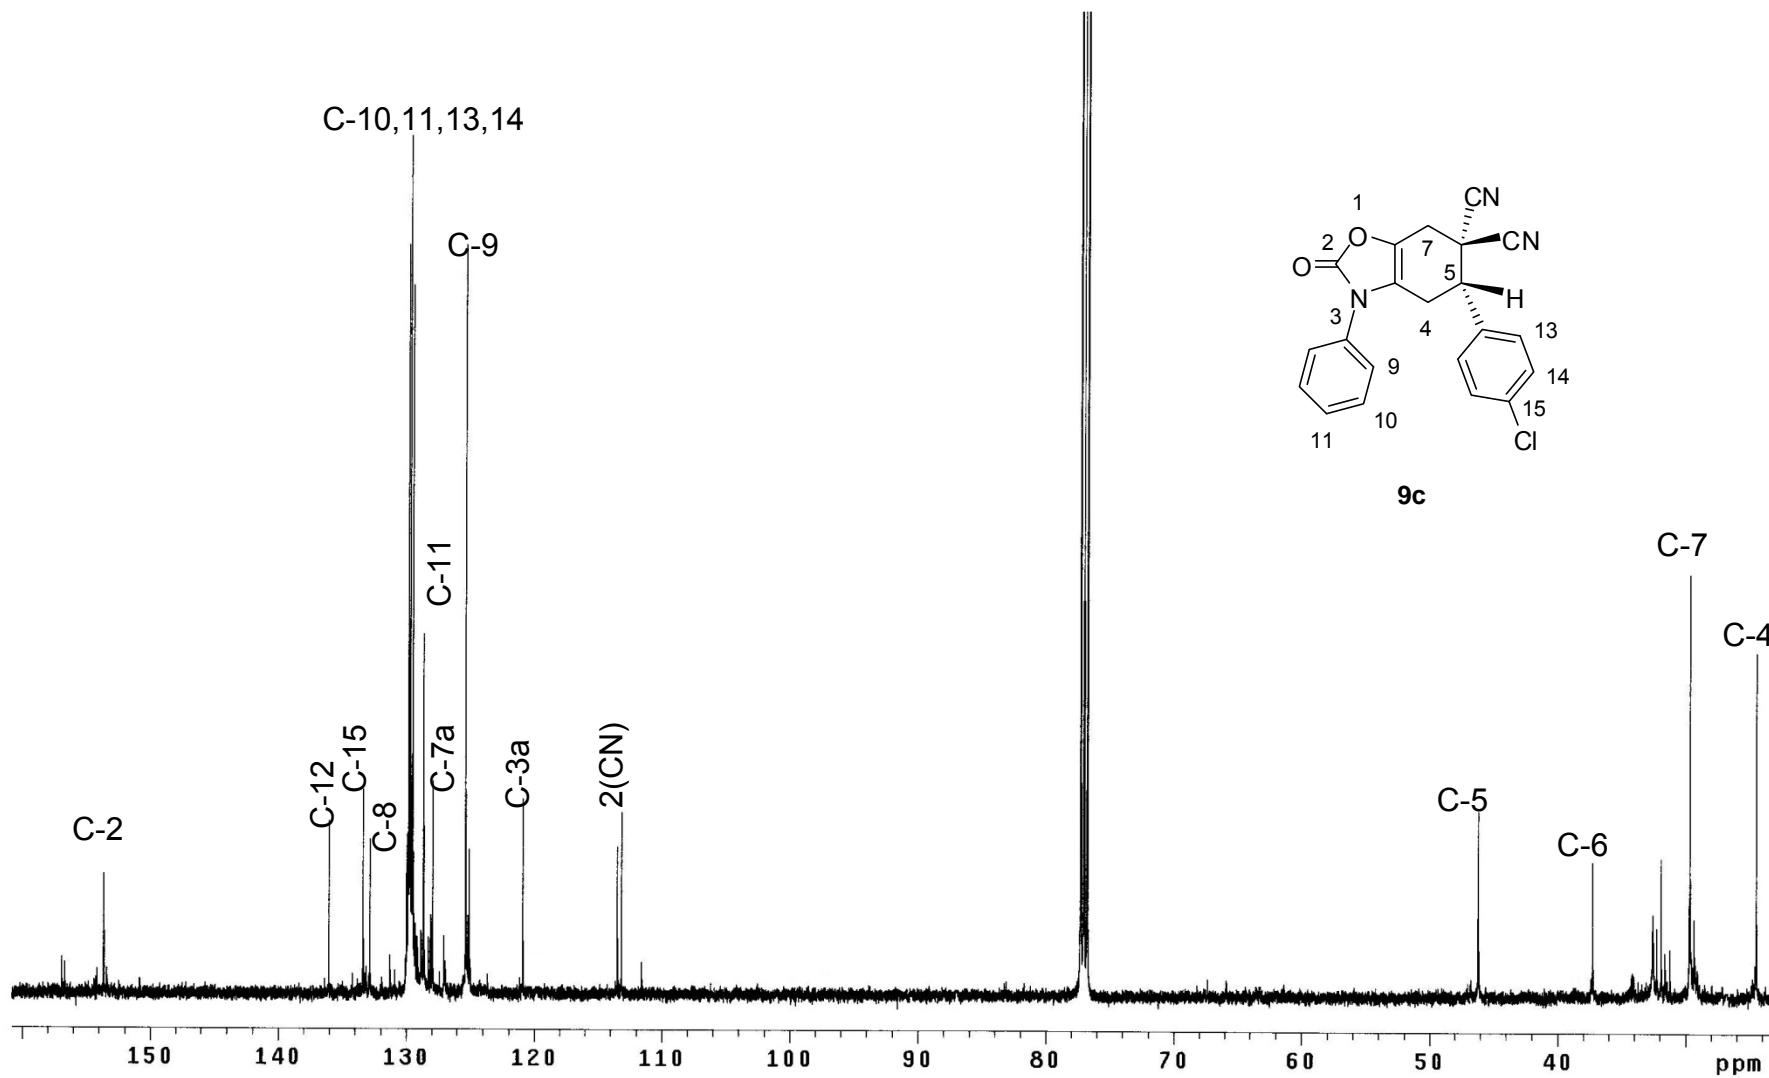

**<sup>13</sup>C NMR (CDCl<sub>3</sub>) 9c**

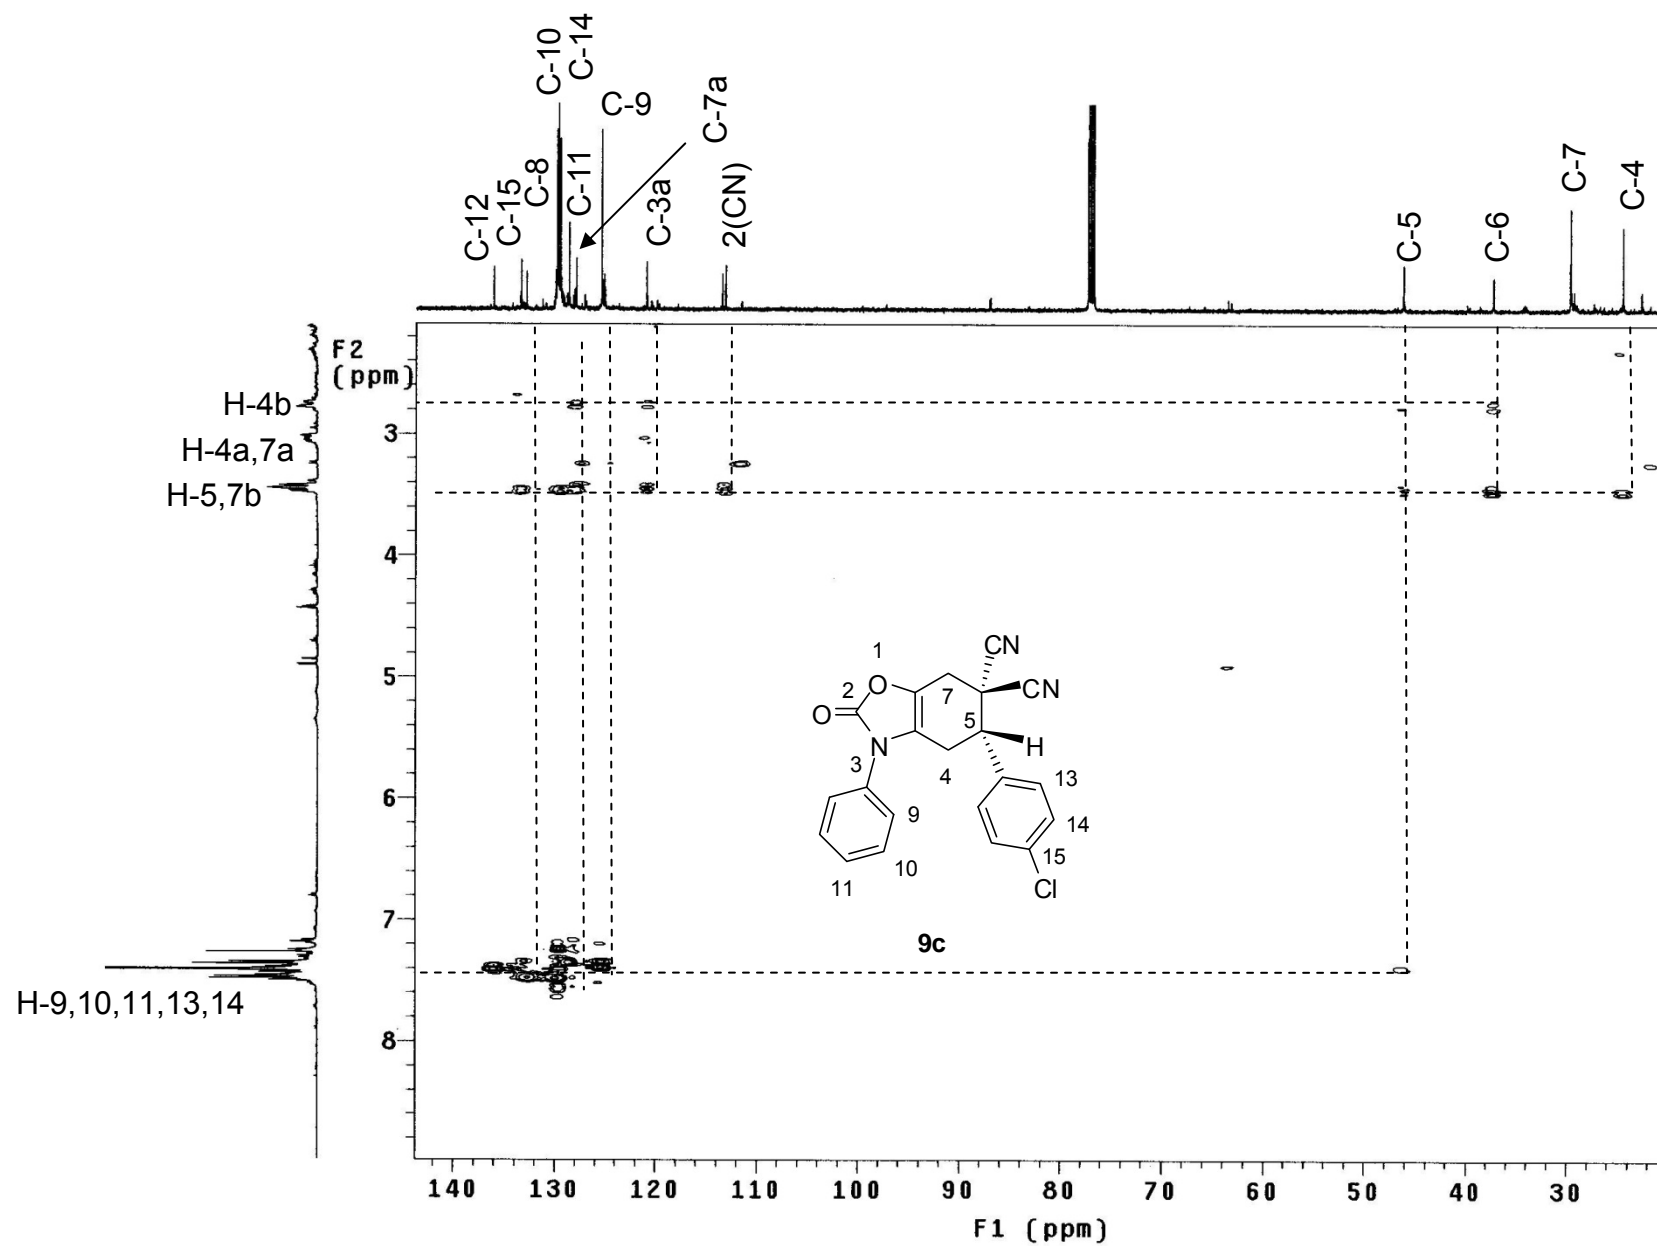

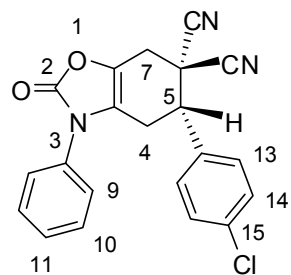**9c**

H-9,10,11,13,14

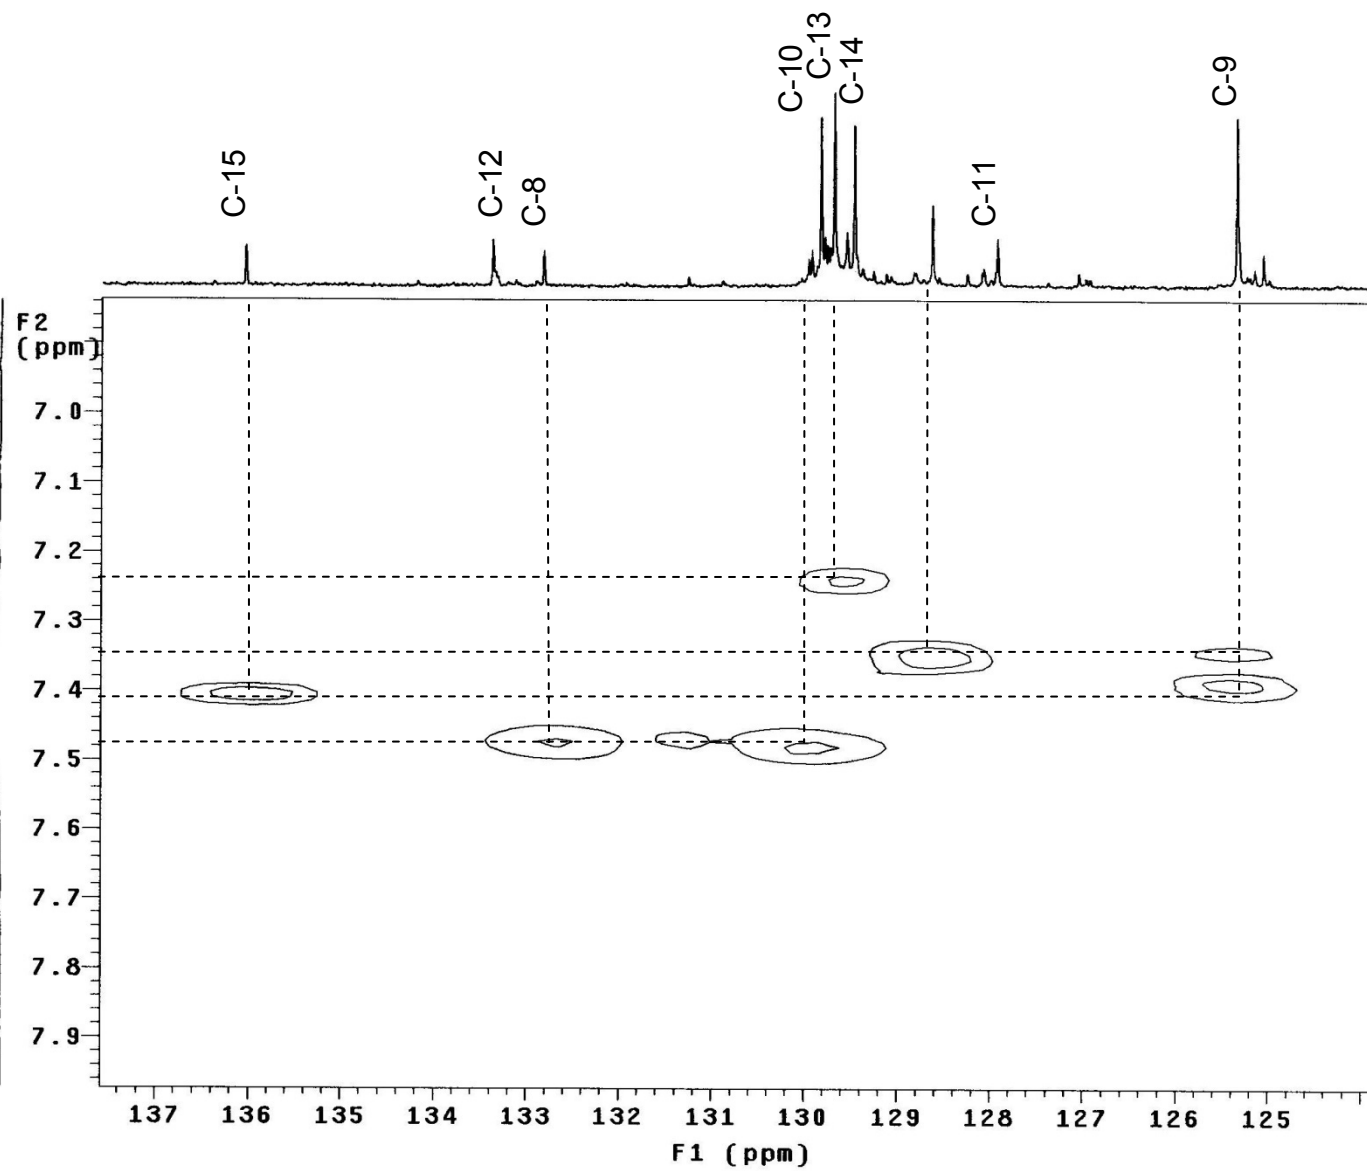HSQC experiment ( $\text{CDCl}_3$ ) **9c**

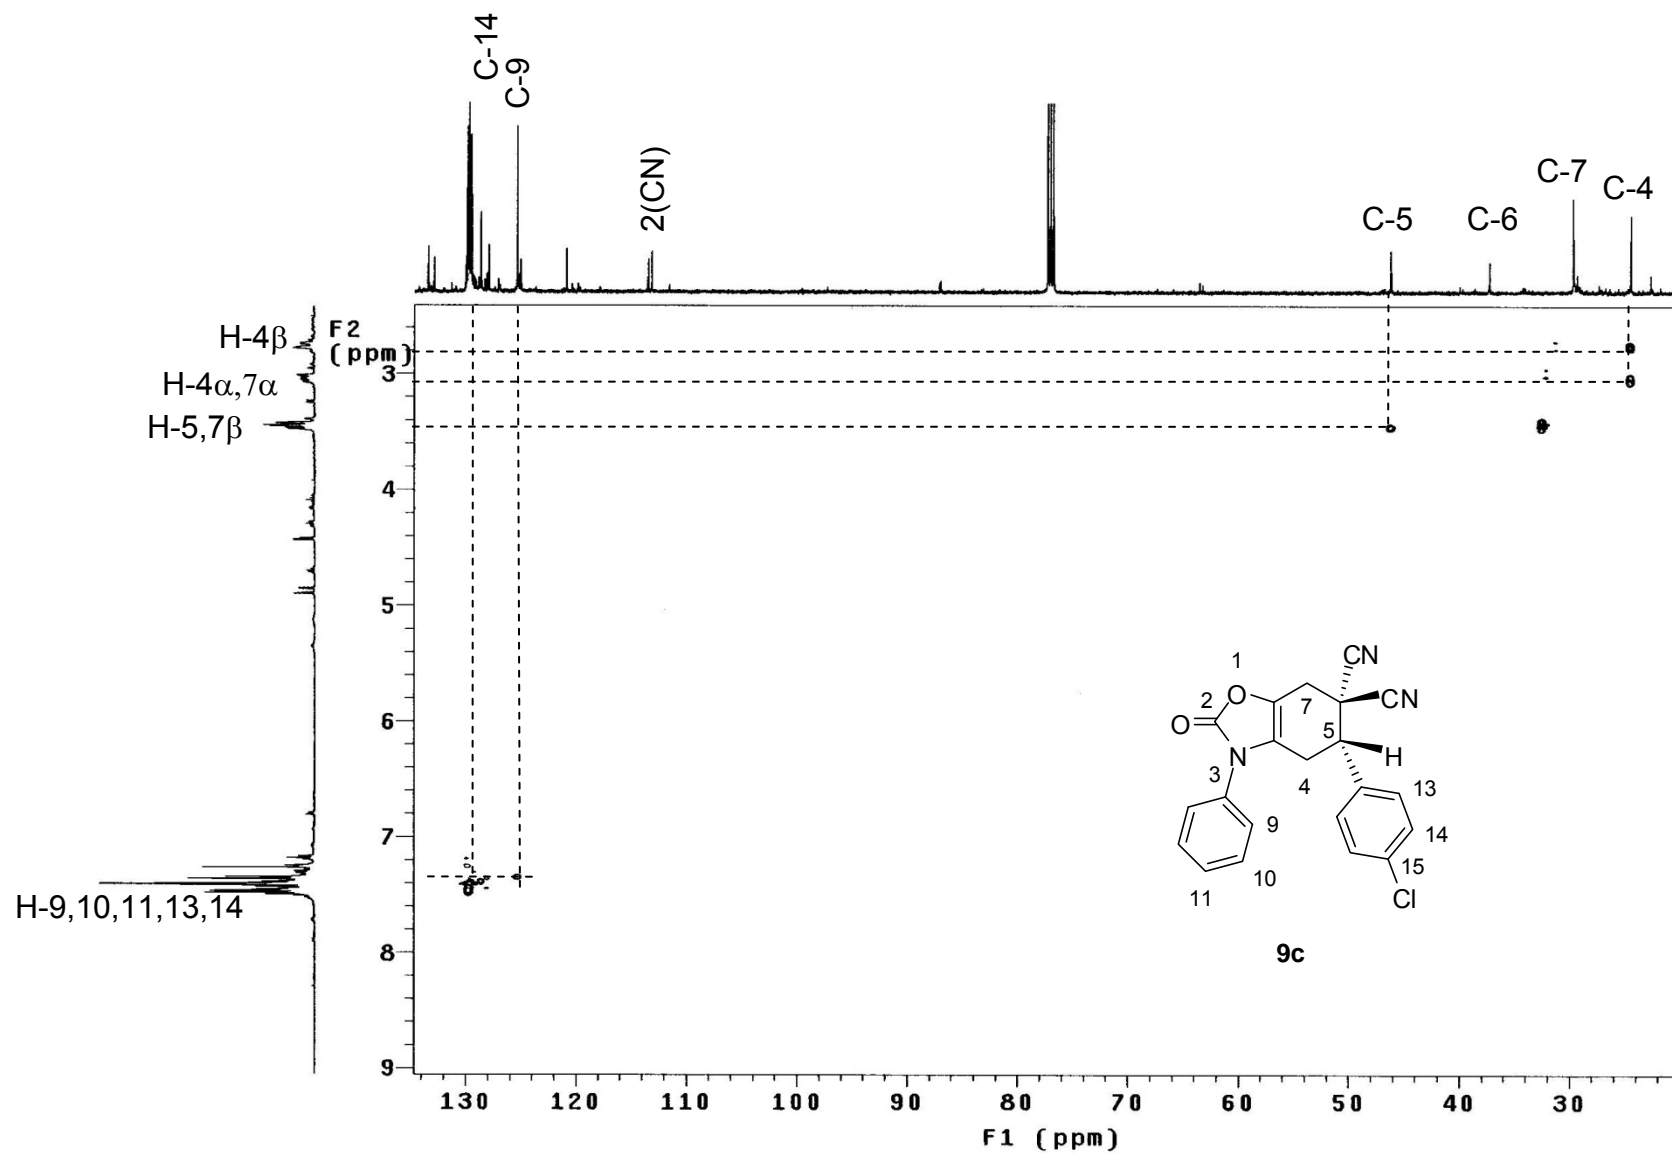HSQC experiment ( $\text{CDCl}_3$ ) **9c**

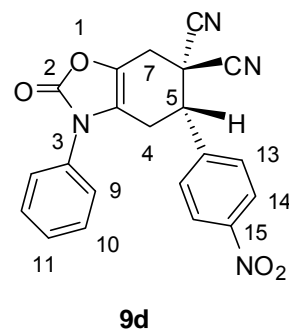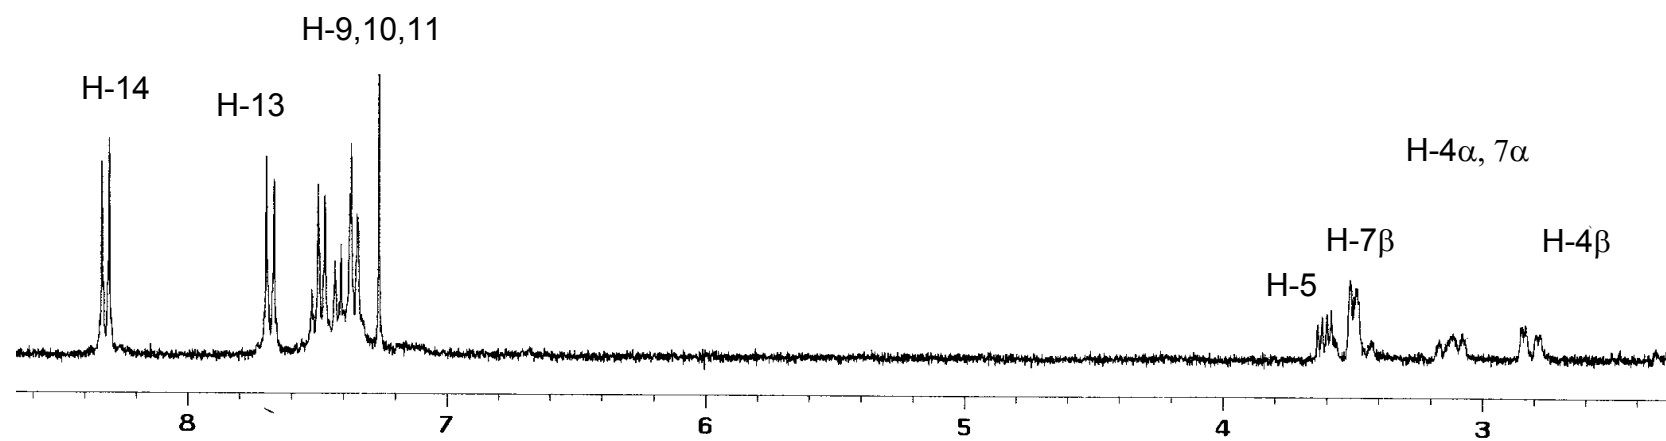

<sup>1</sup>H NMR (CDCl<sub>3</sub>) **9d**

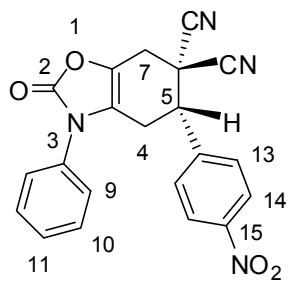**9d**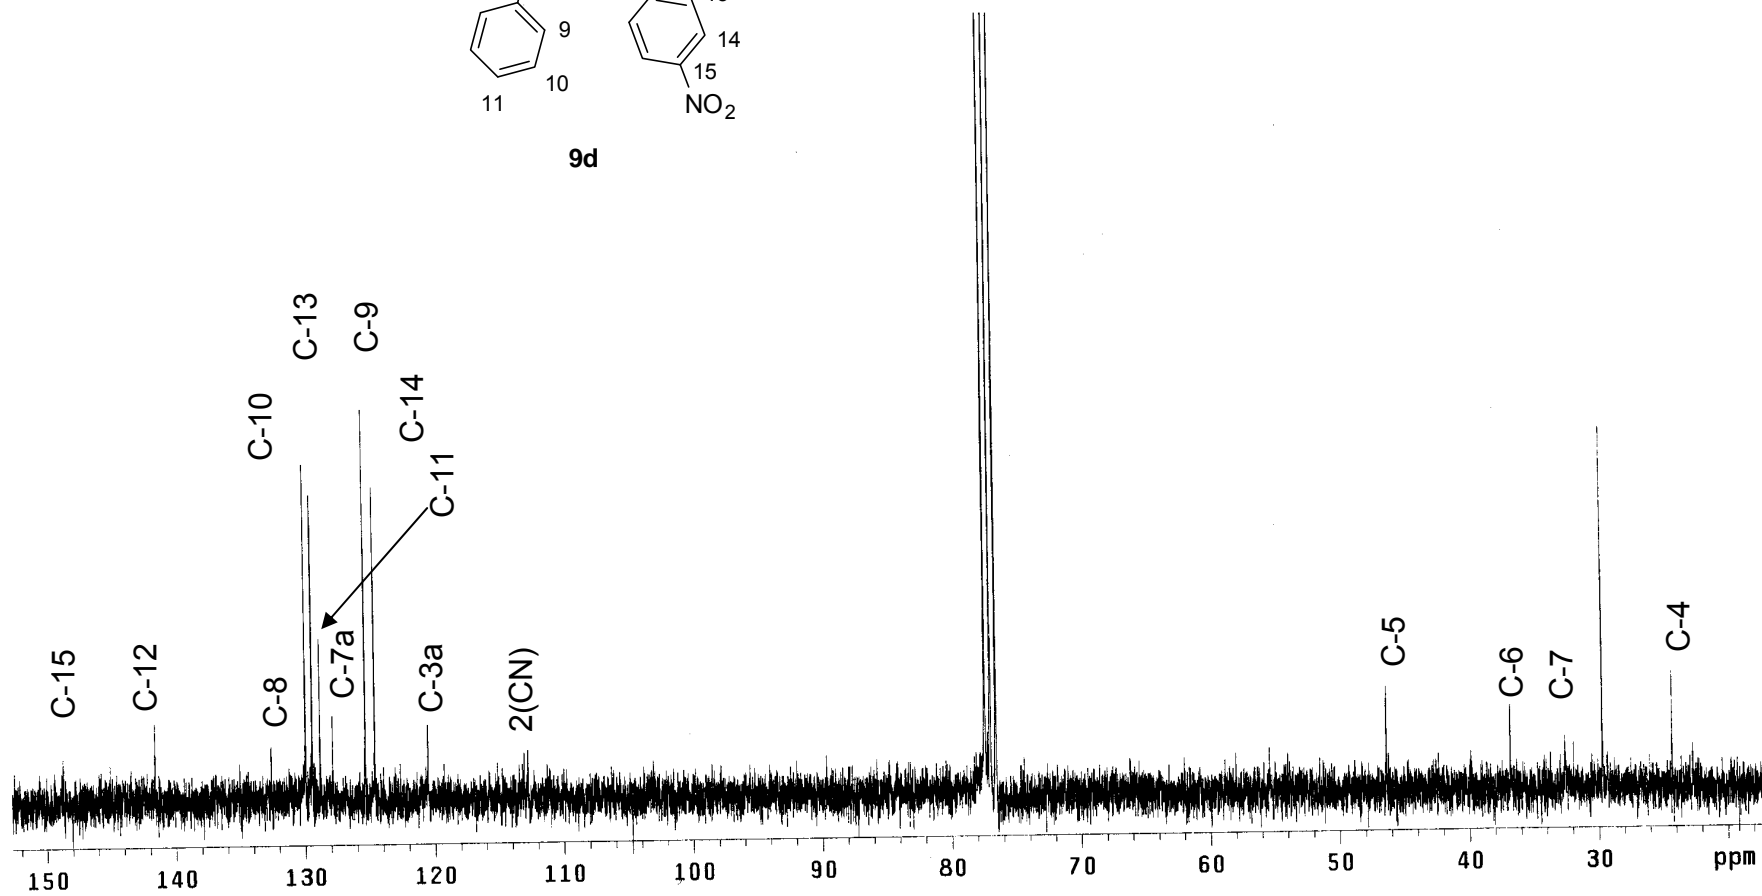<sup>13</sup>C NMR (CDCl<sub>3</sub>) **9d**



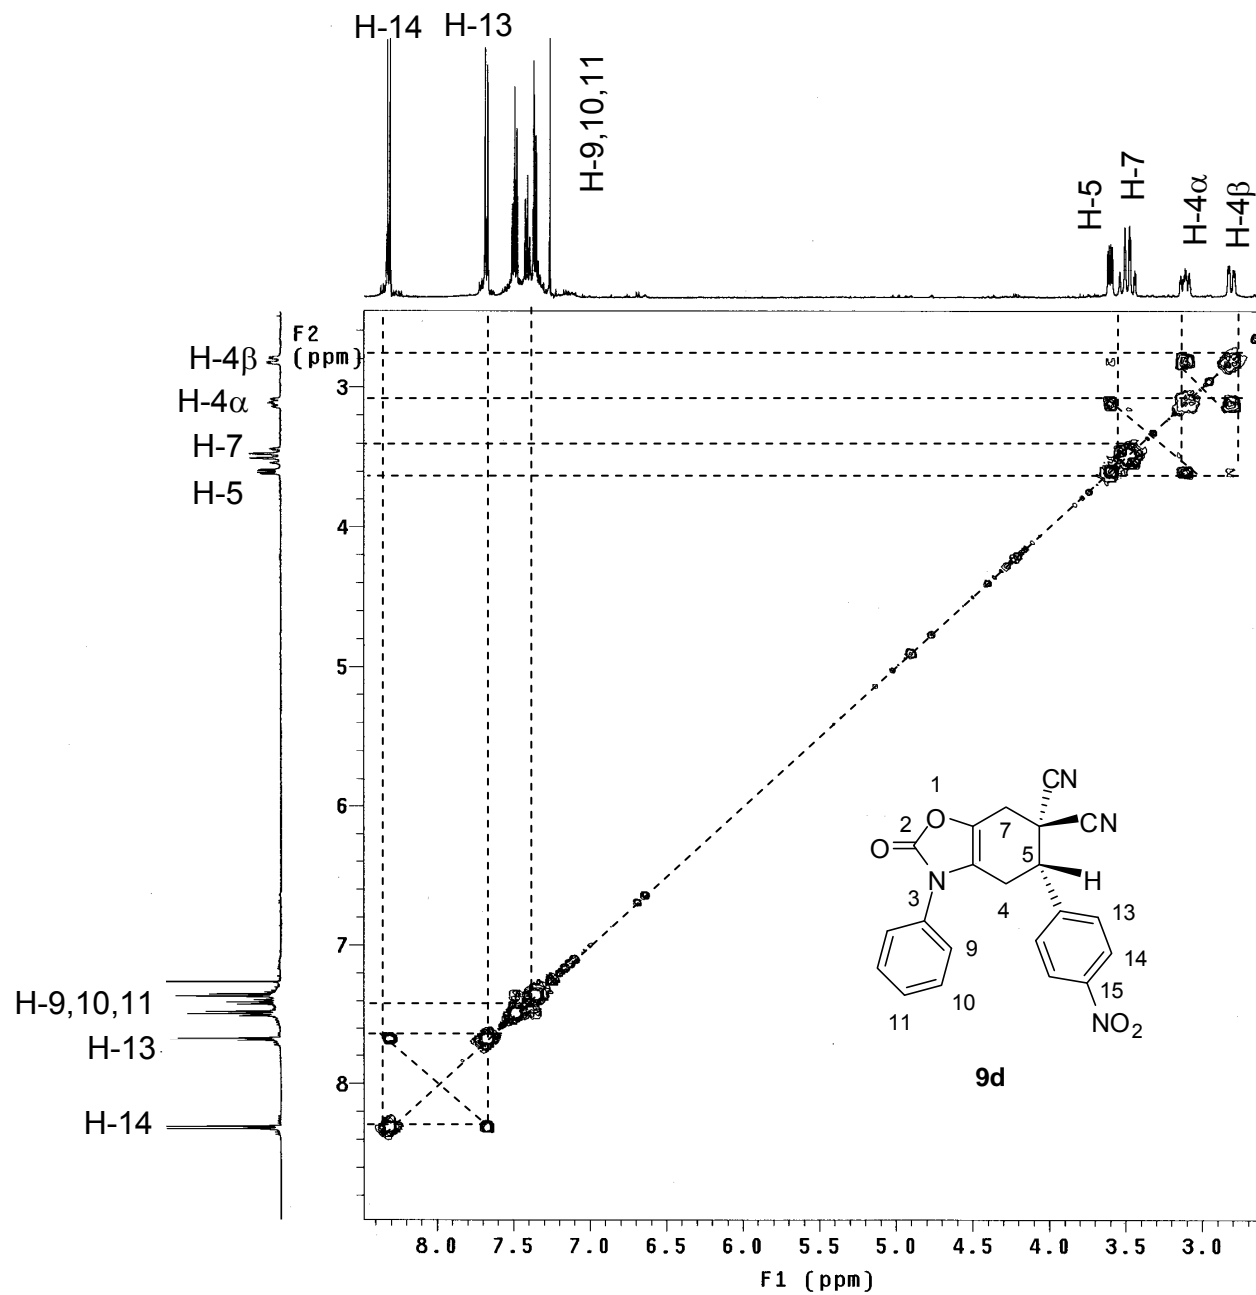COSY experiment (CDCl<sub>3</sub>) 9d

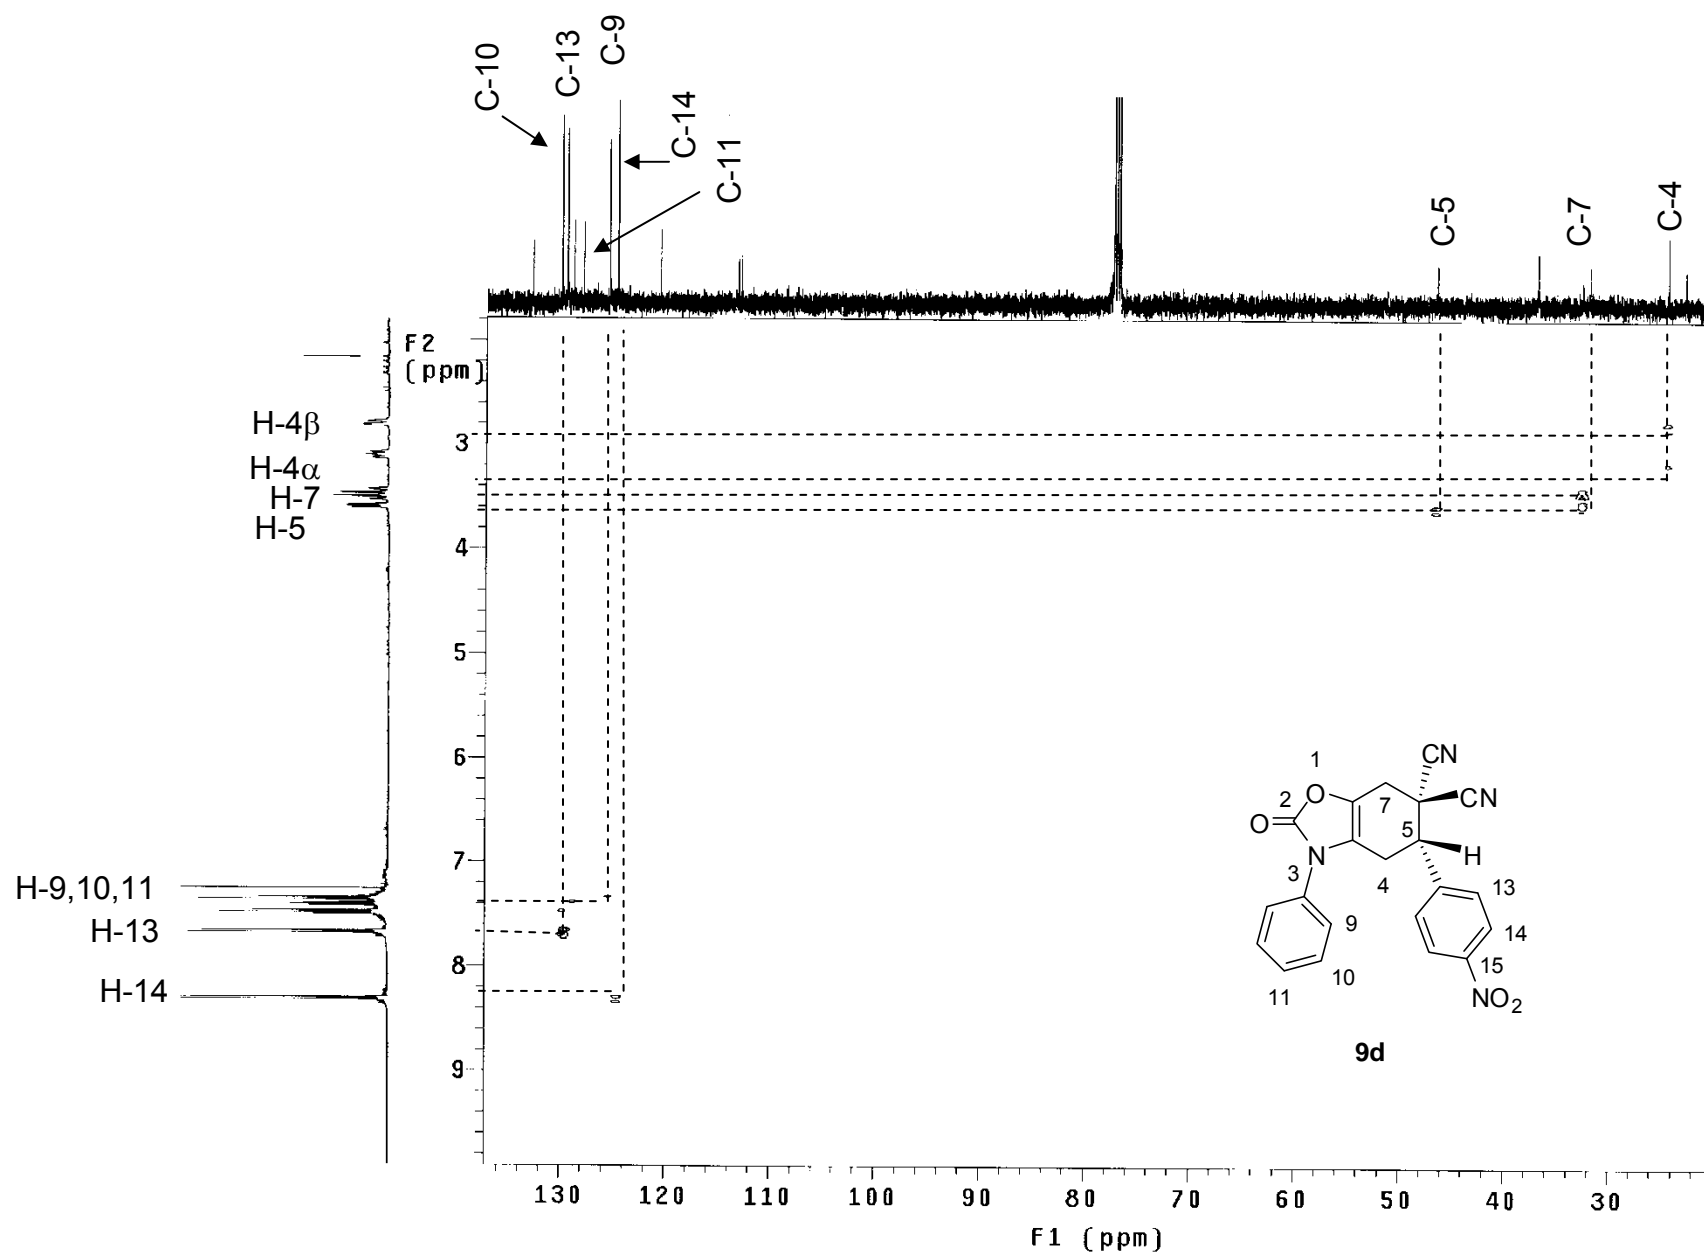

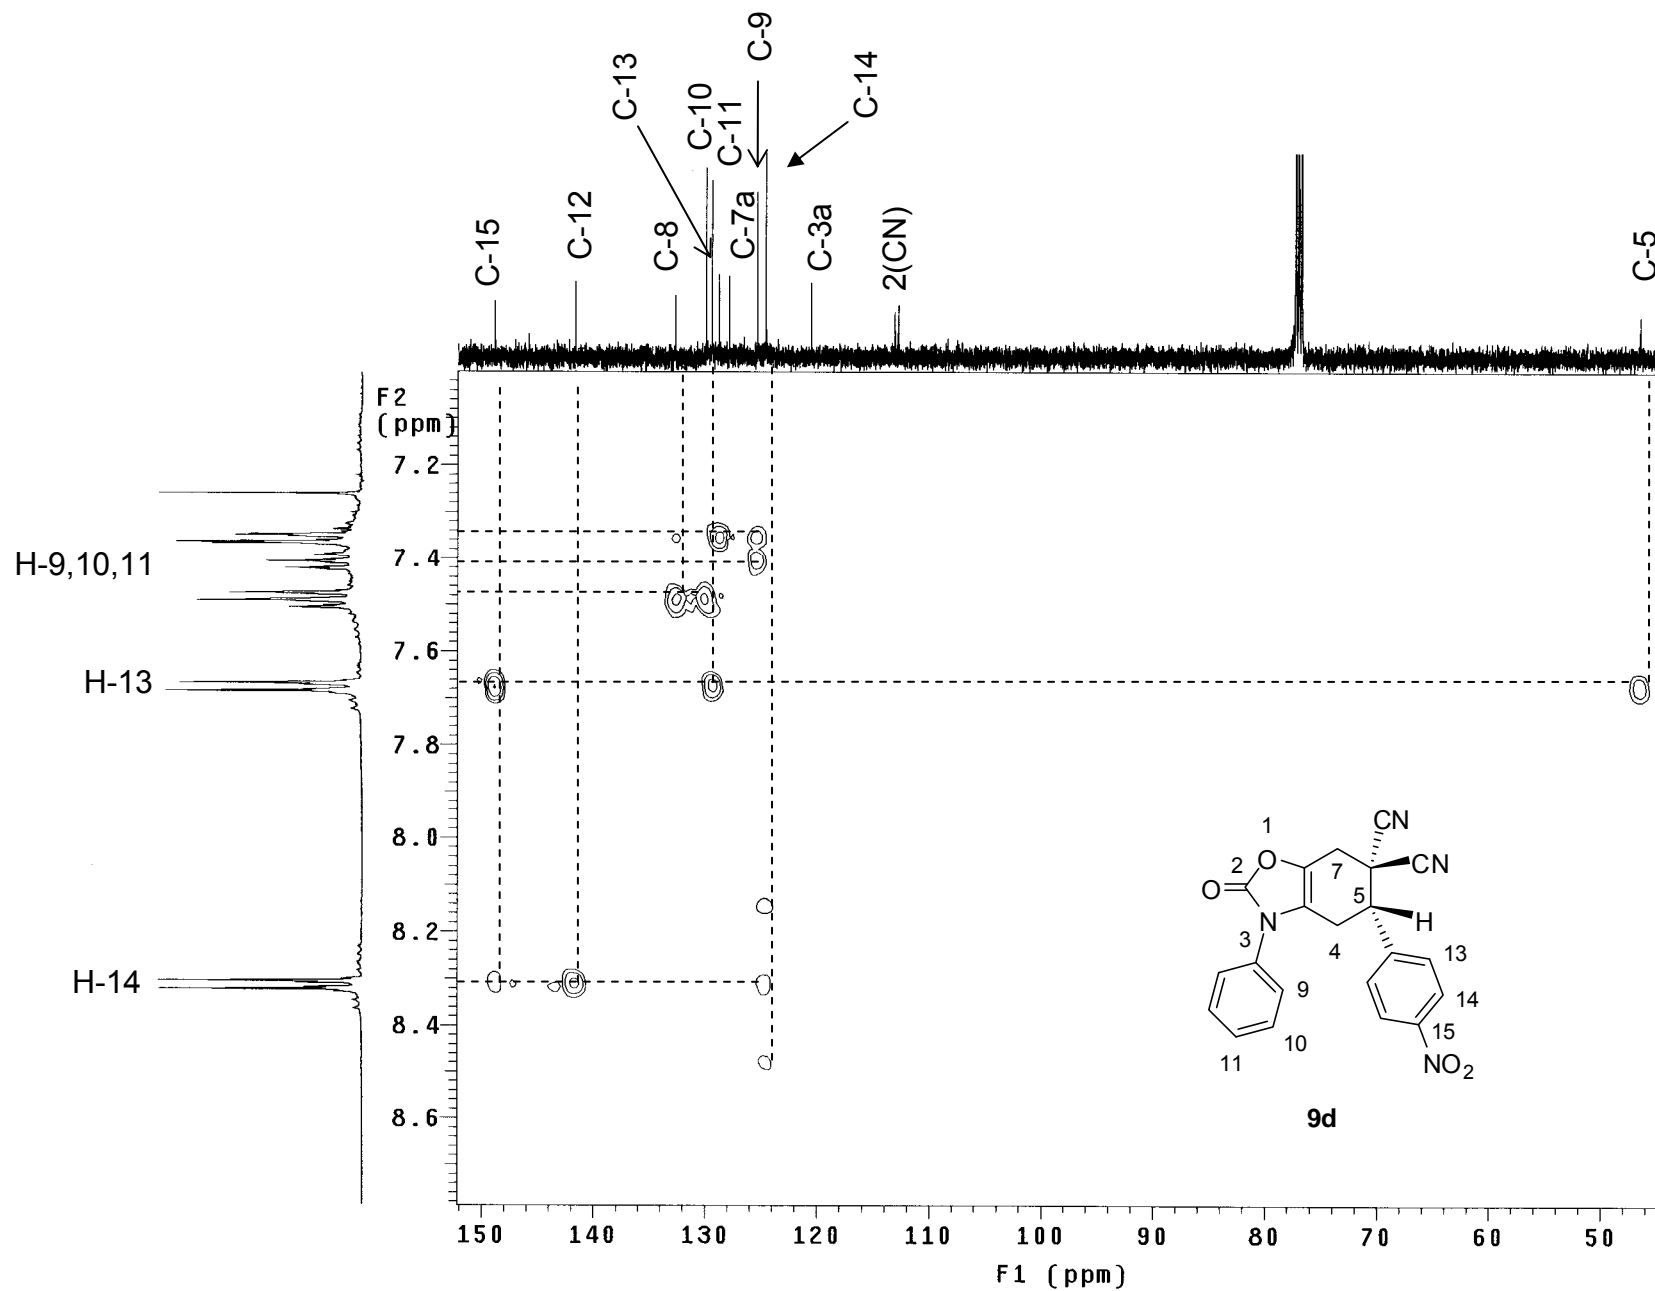

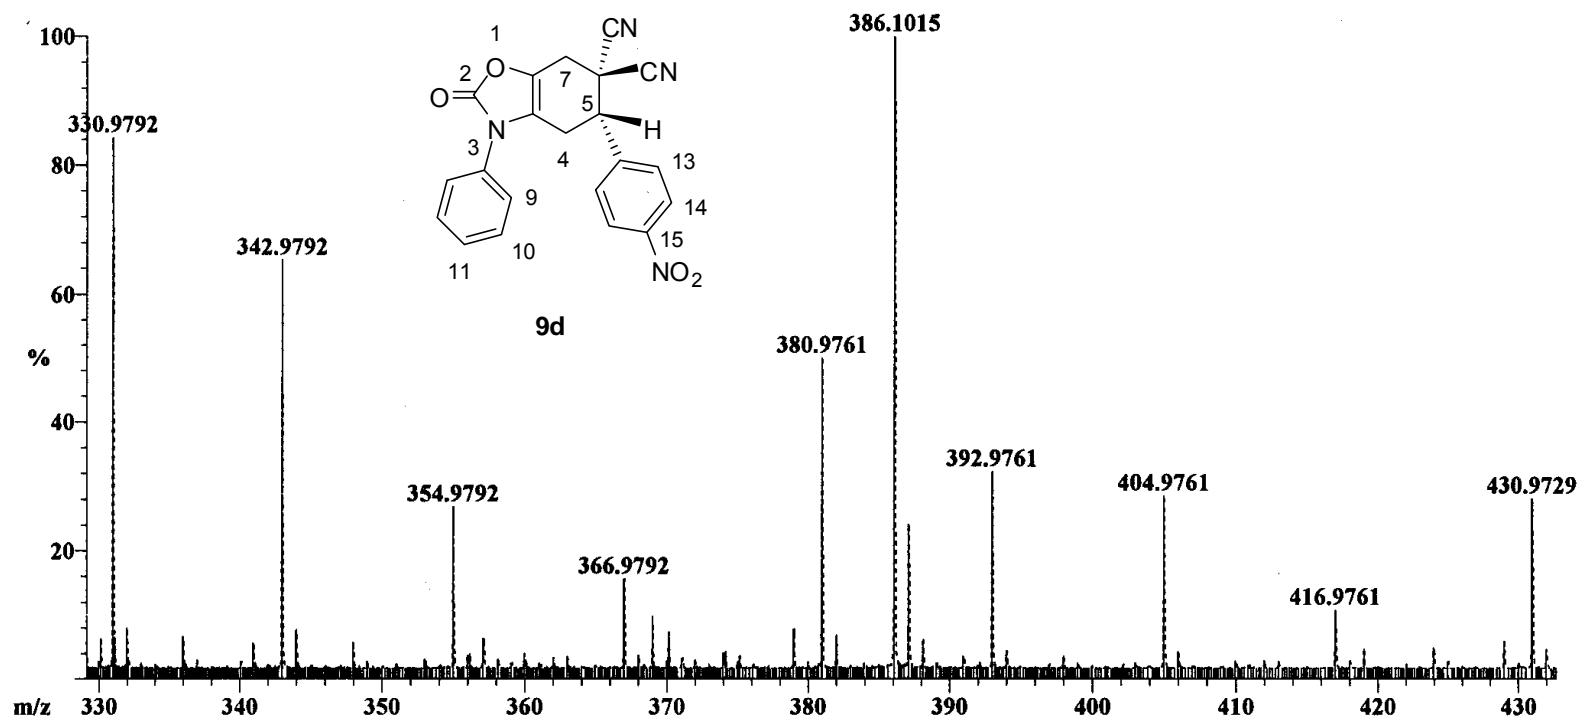

Selected Isotopes : N<sub>0-4</sub> O<sub>0-4</sub> H<sub>0-14</sub> C<sub>0-21</sub>

Error Limit : 10 mmu

| <u>Measured Mass</u> | <u>% Base</u> | <u>Formula</u>                                                | <u>Calculated Mass</u> | <u>Error</u> |
|----------------------|---------------|---------------------------------------------------------------|------------------------|--------------|
| 386.1015             | 100.0%        | C <sub>21</sub> H <sub>14</sub> N <sub>4</sub> O <sub>4</sub> | 386.1015               | 0.0          |

HRMS 9d

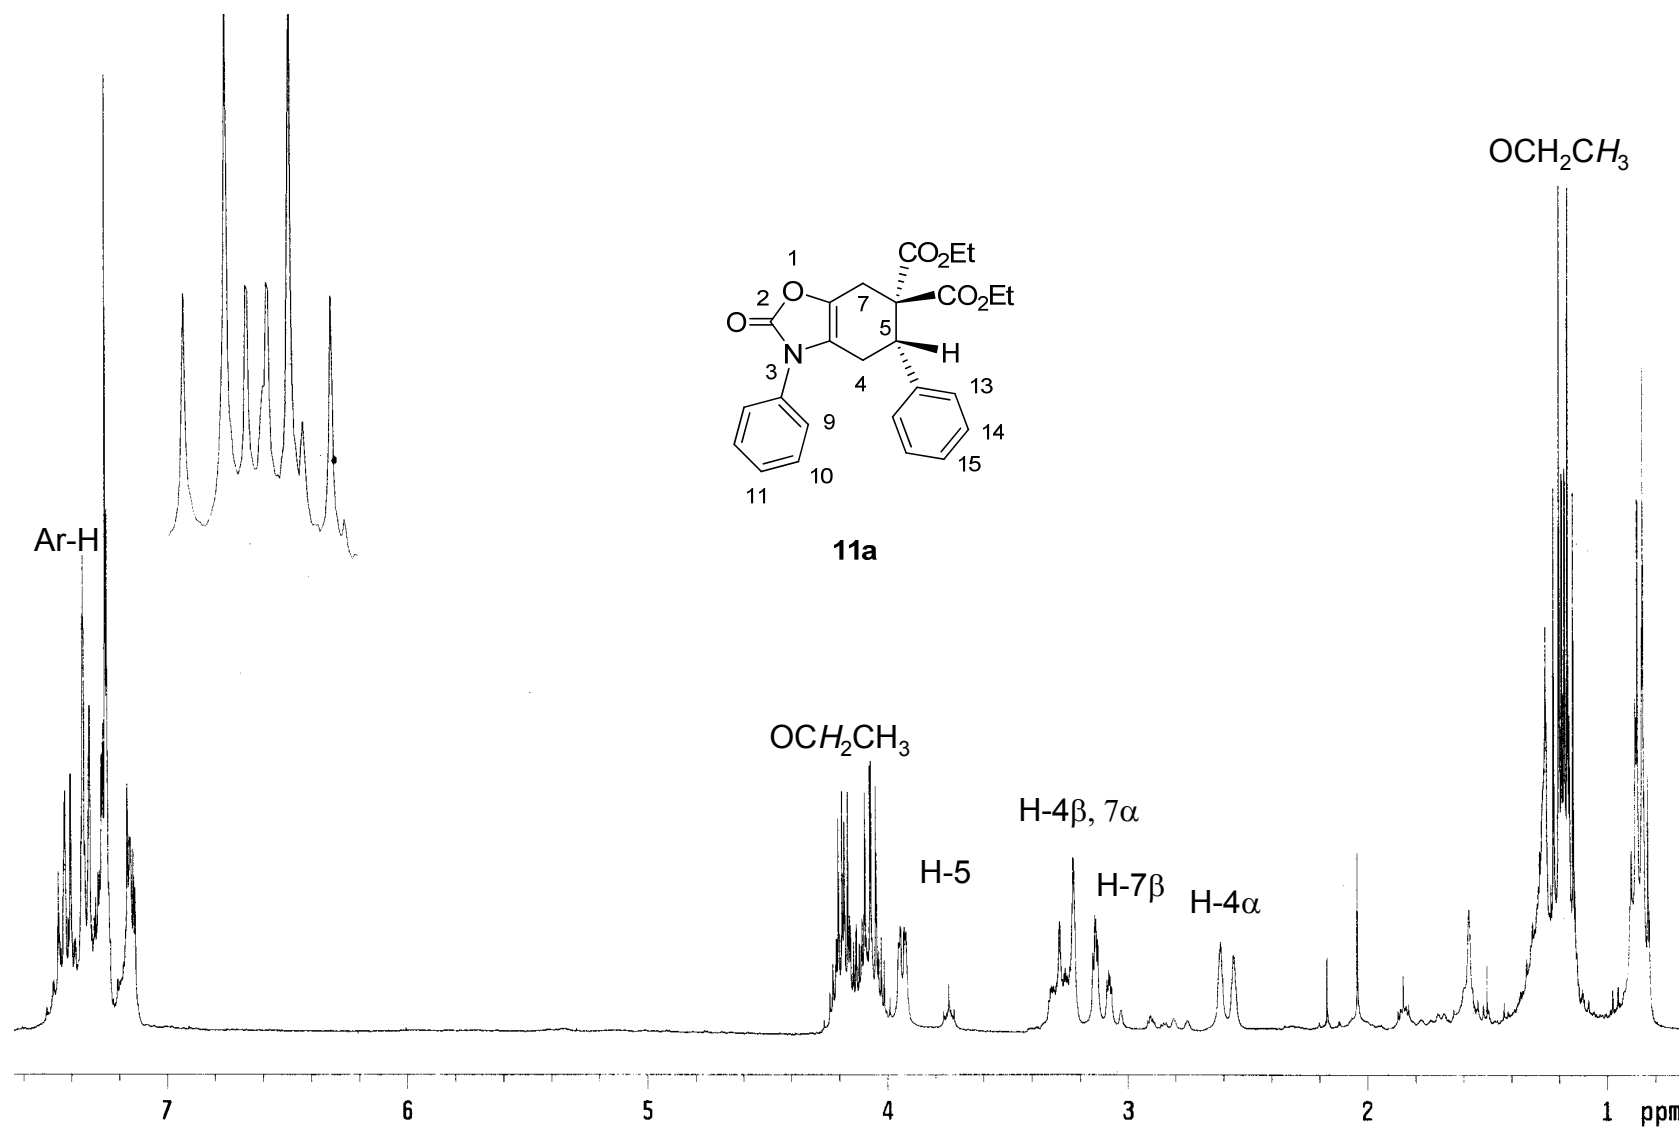 $^1\text{H}$  NMR ( $\text{CDCl}_3$ ) **11a**

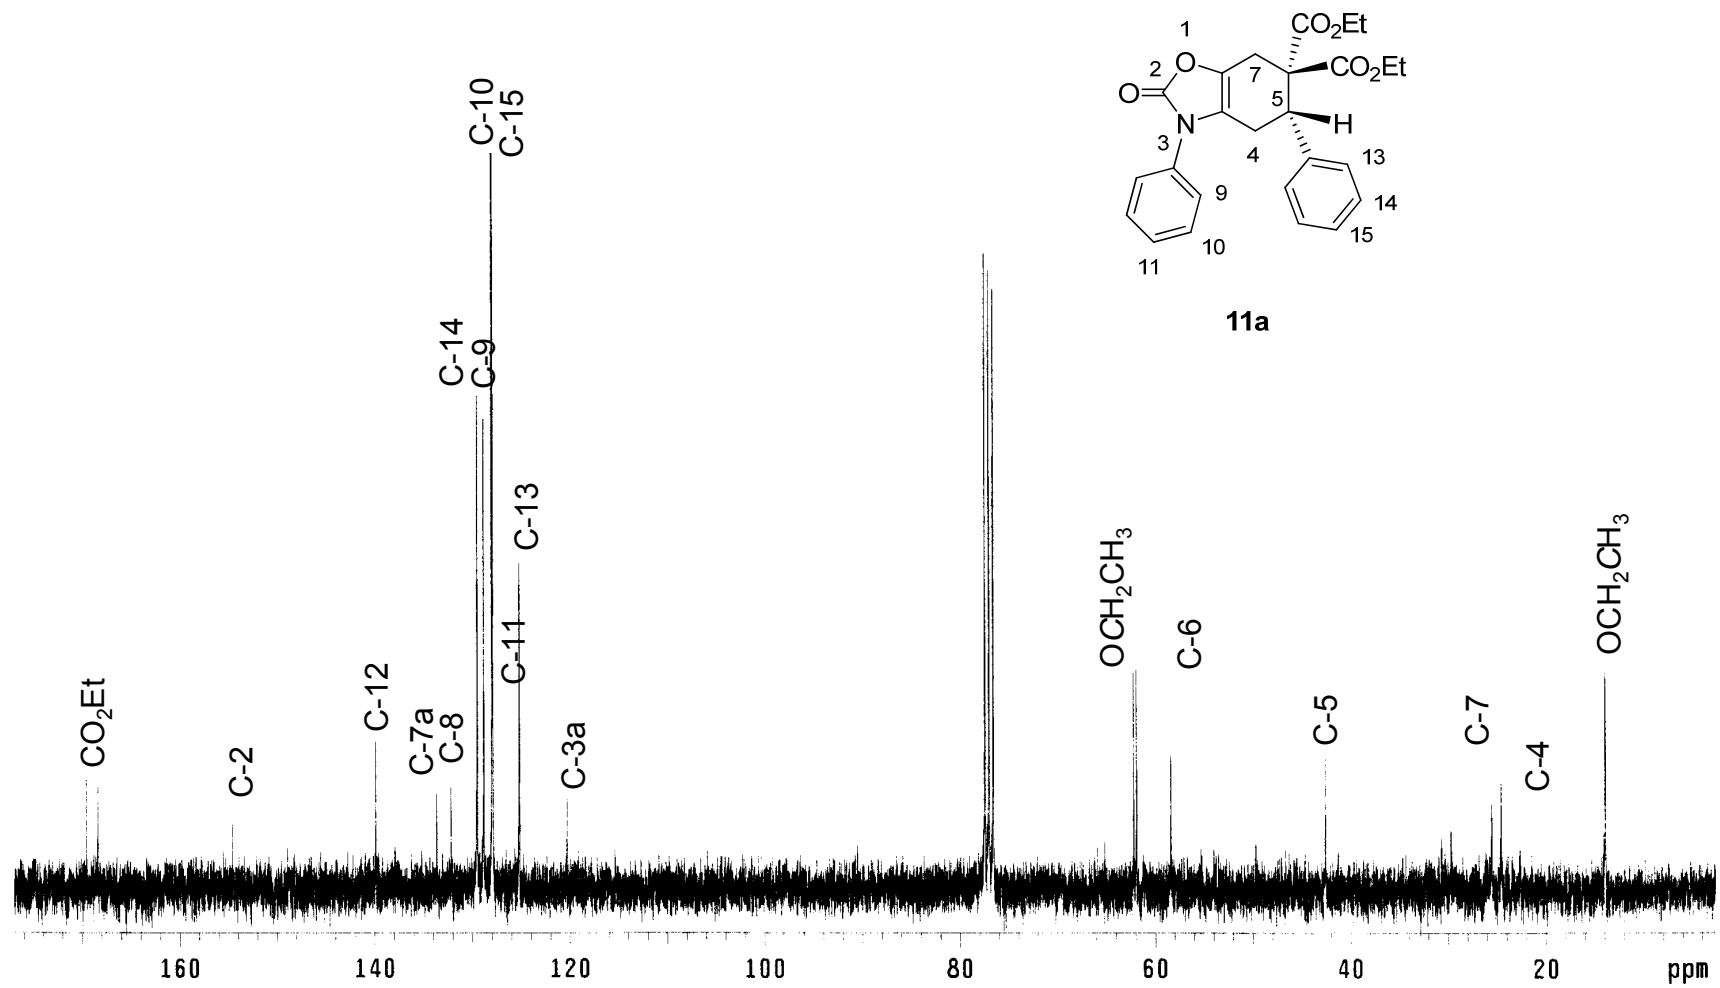

**13C NMR (CDCl<sub>3</sub>) 11a**

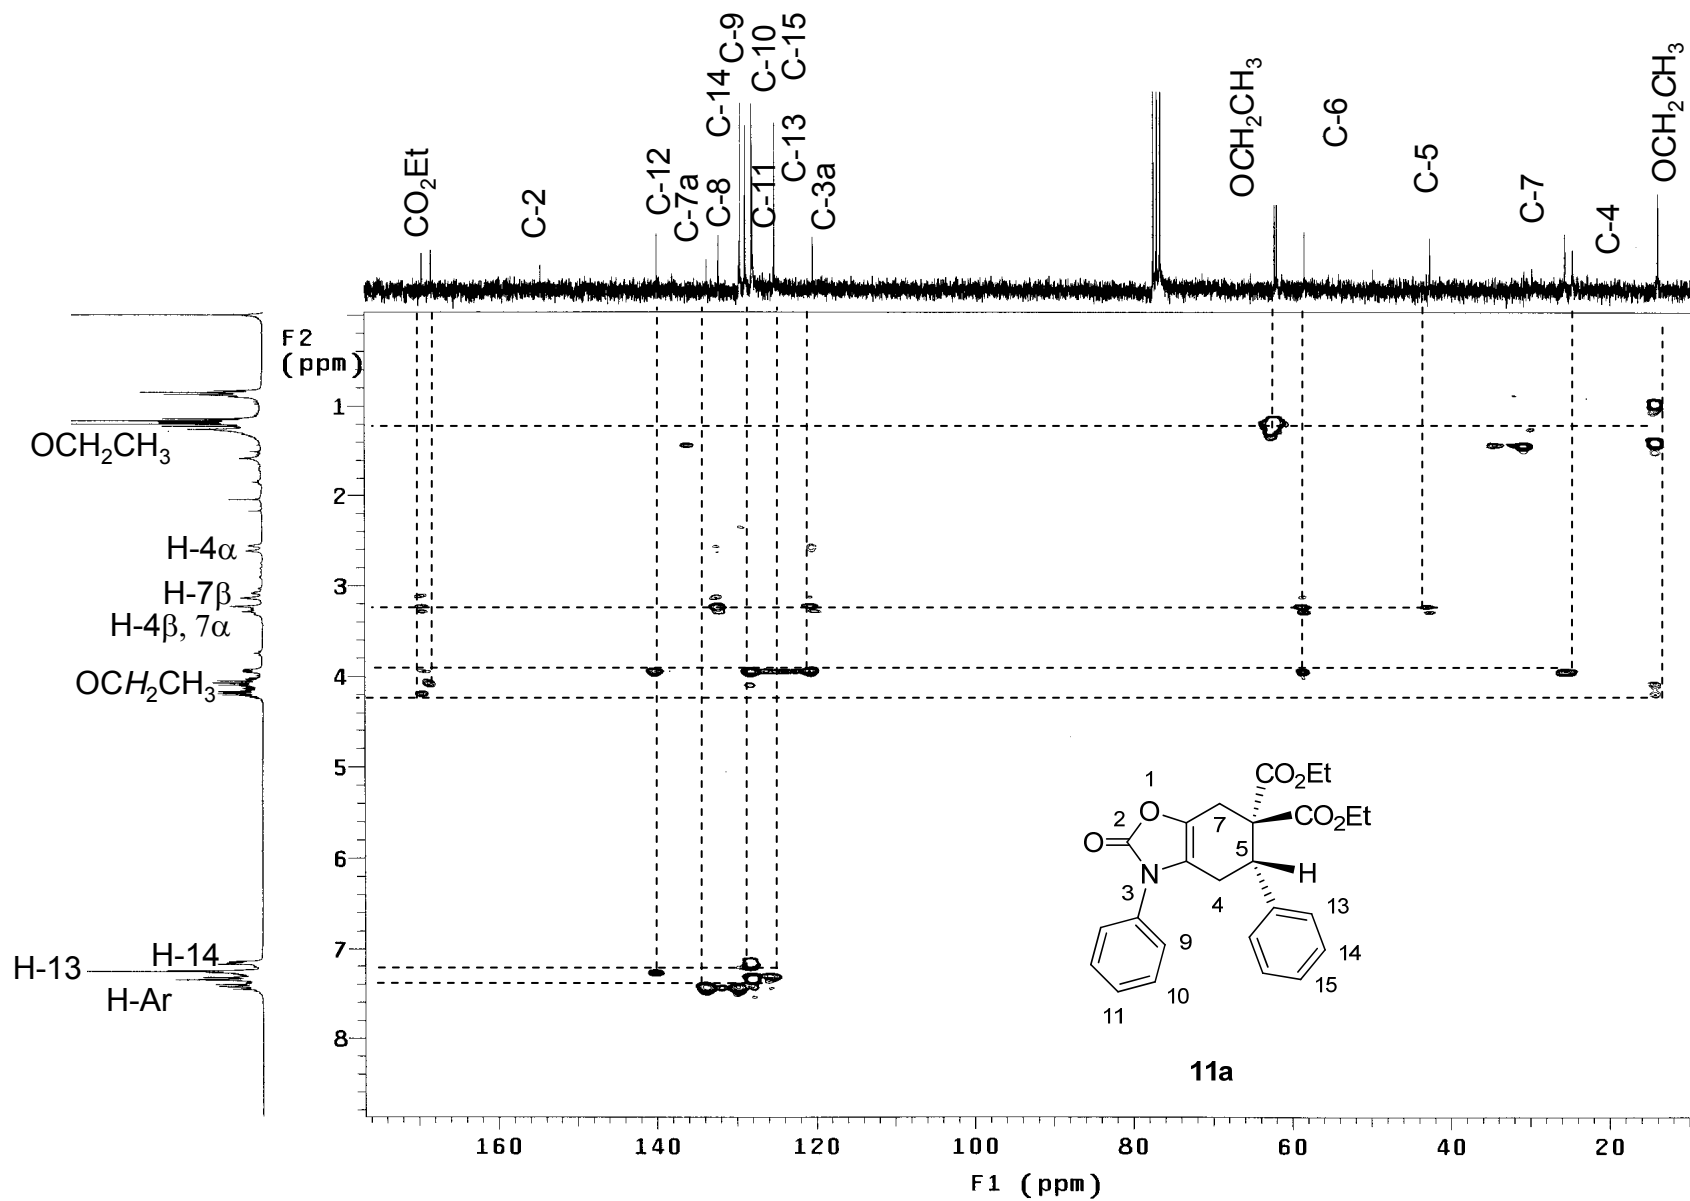

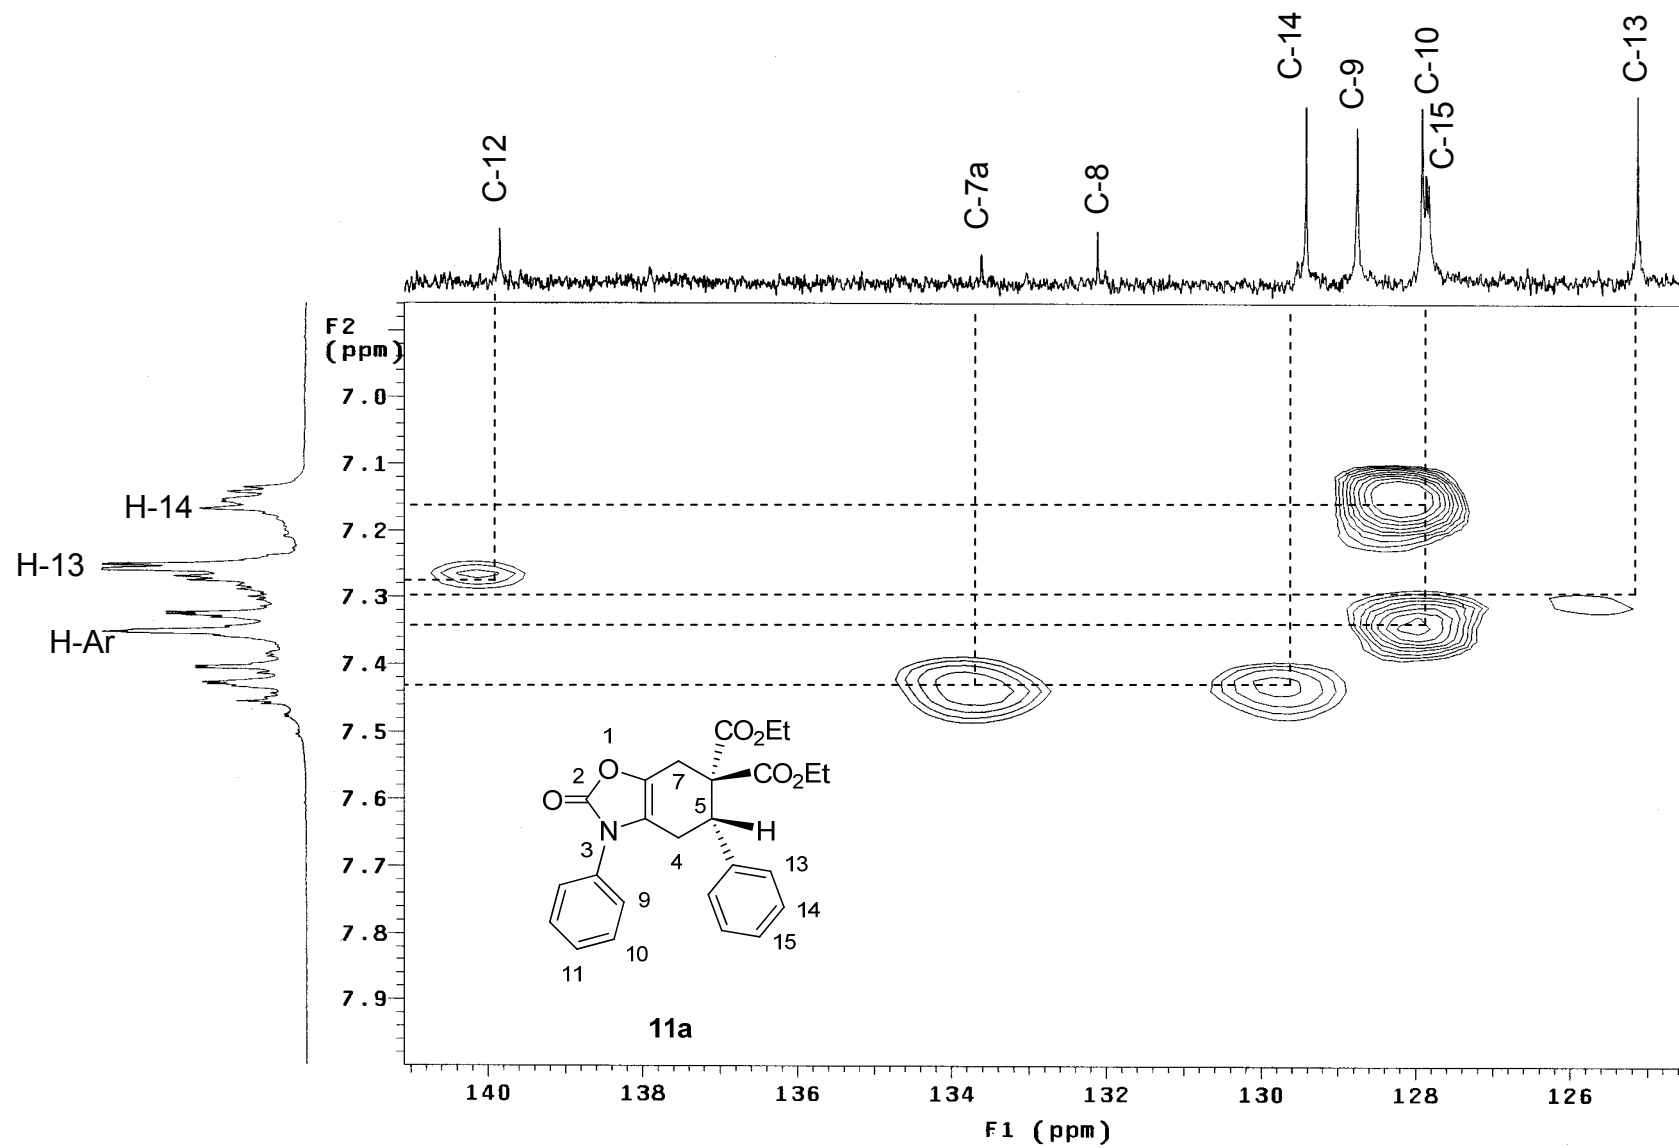



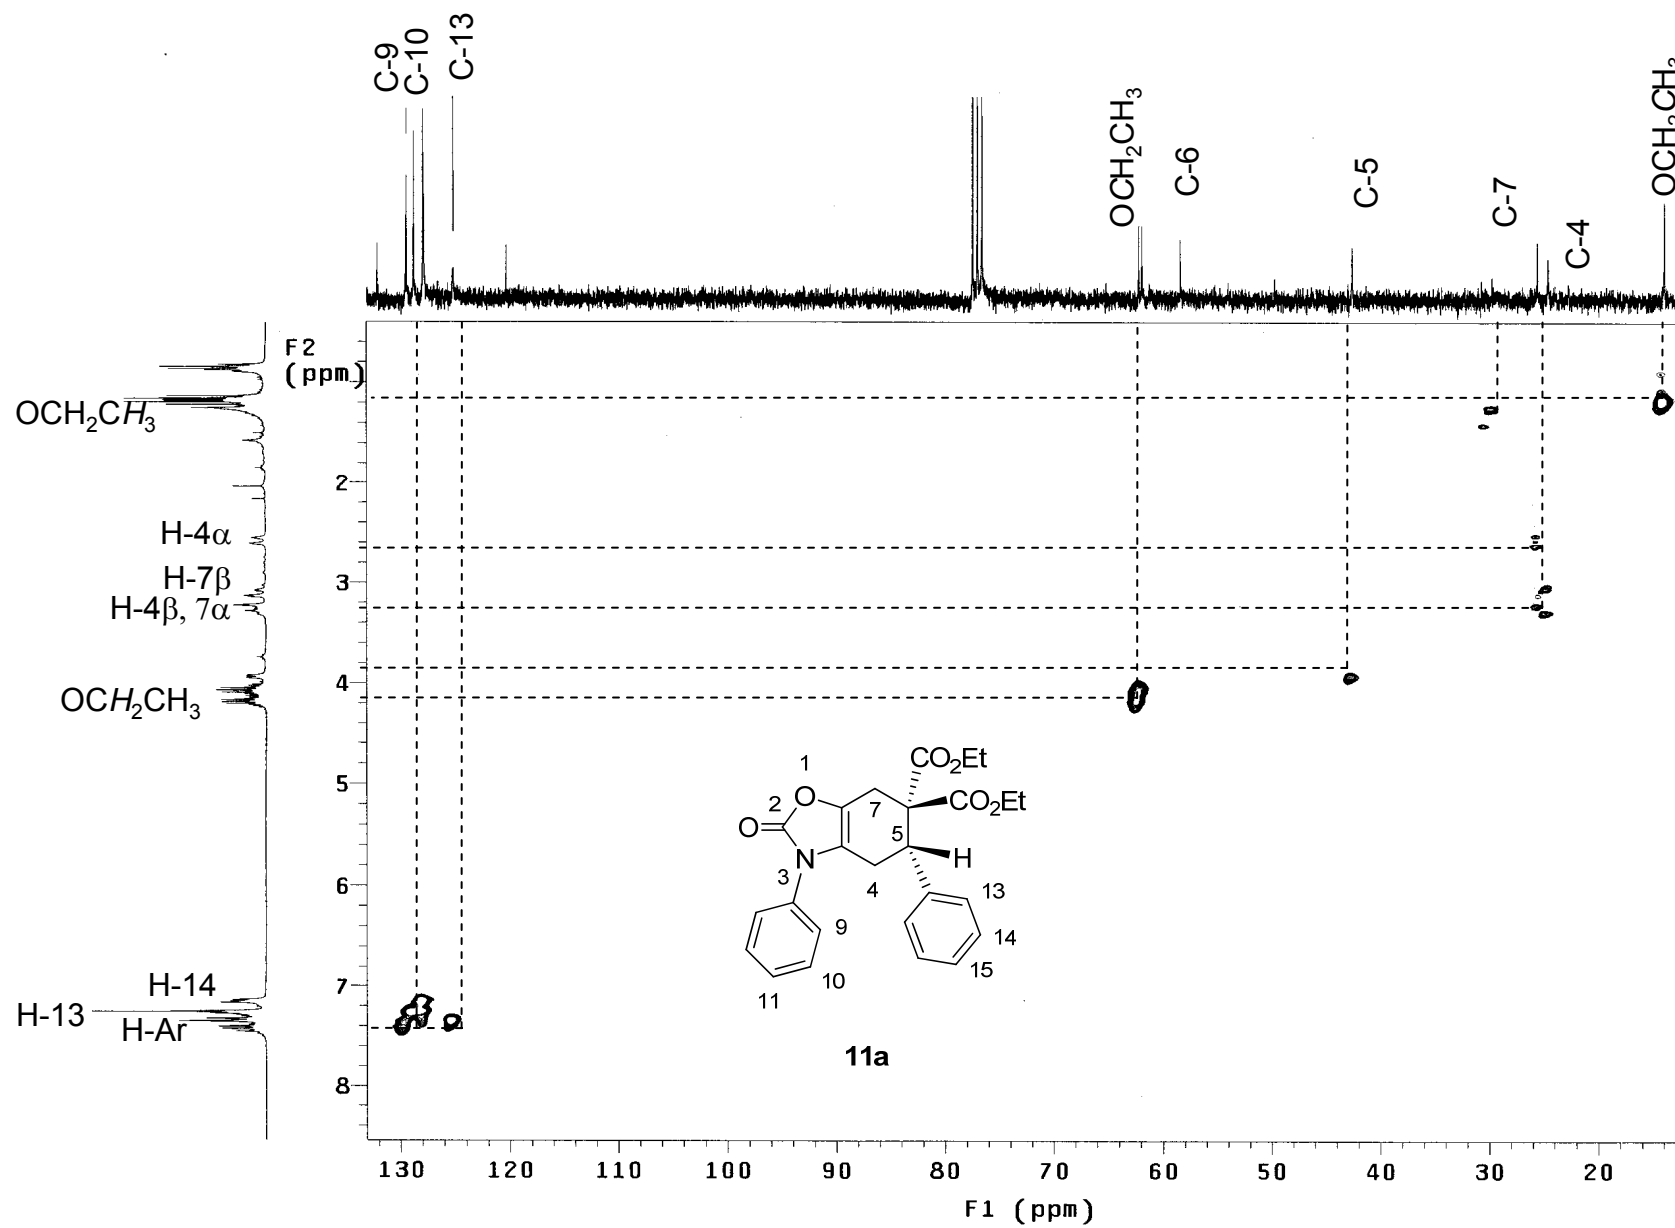

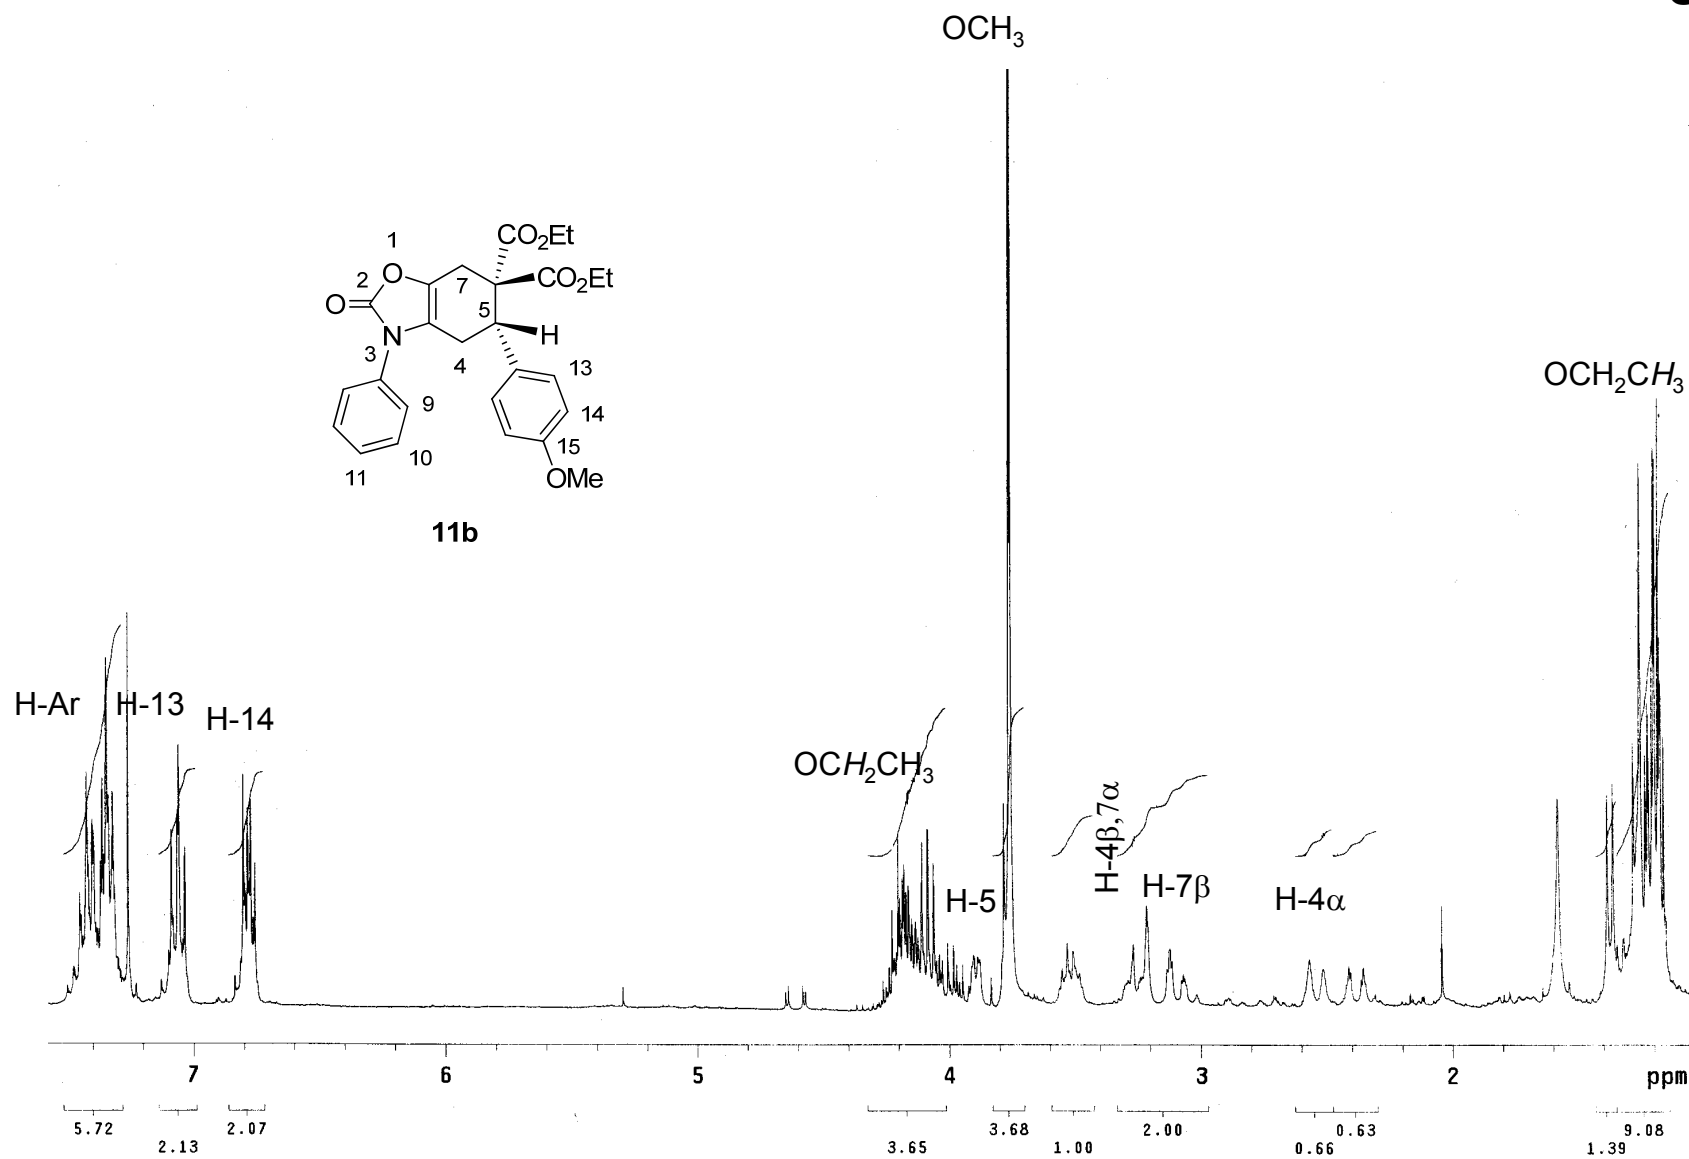

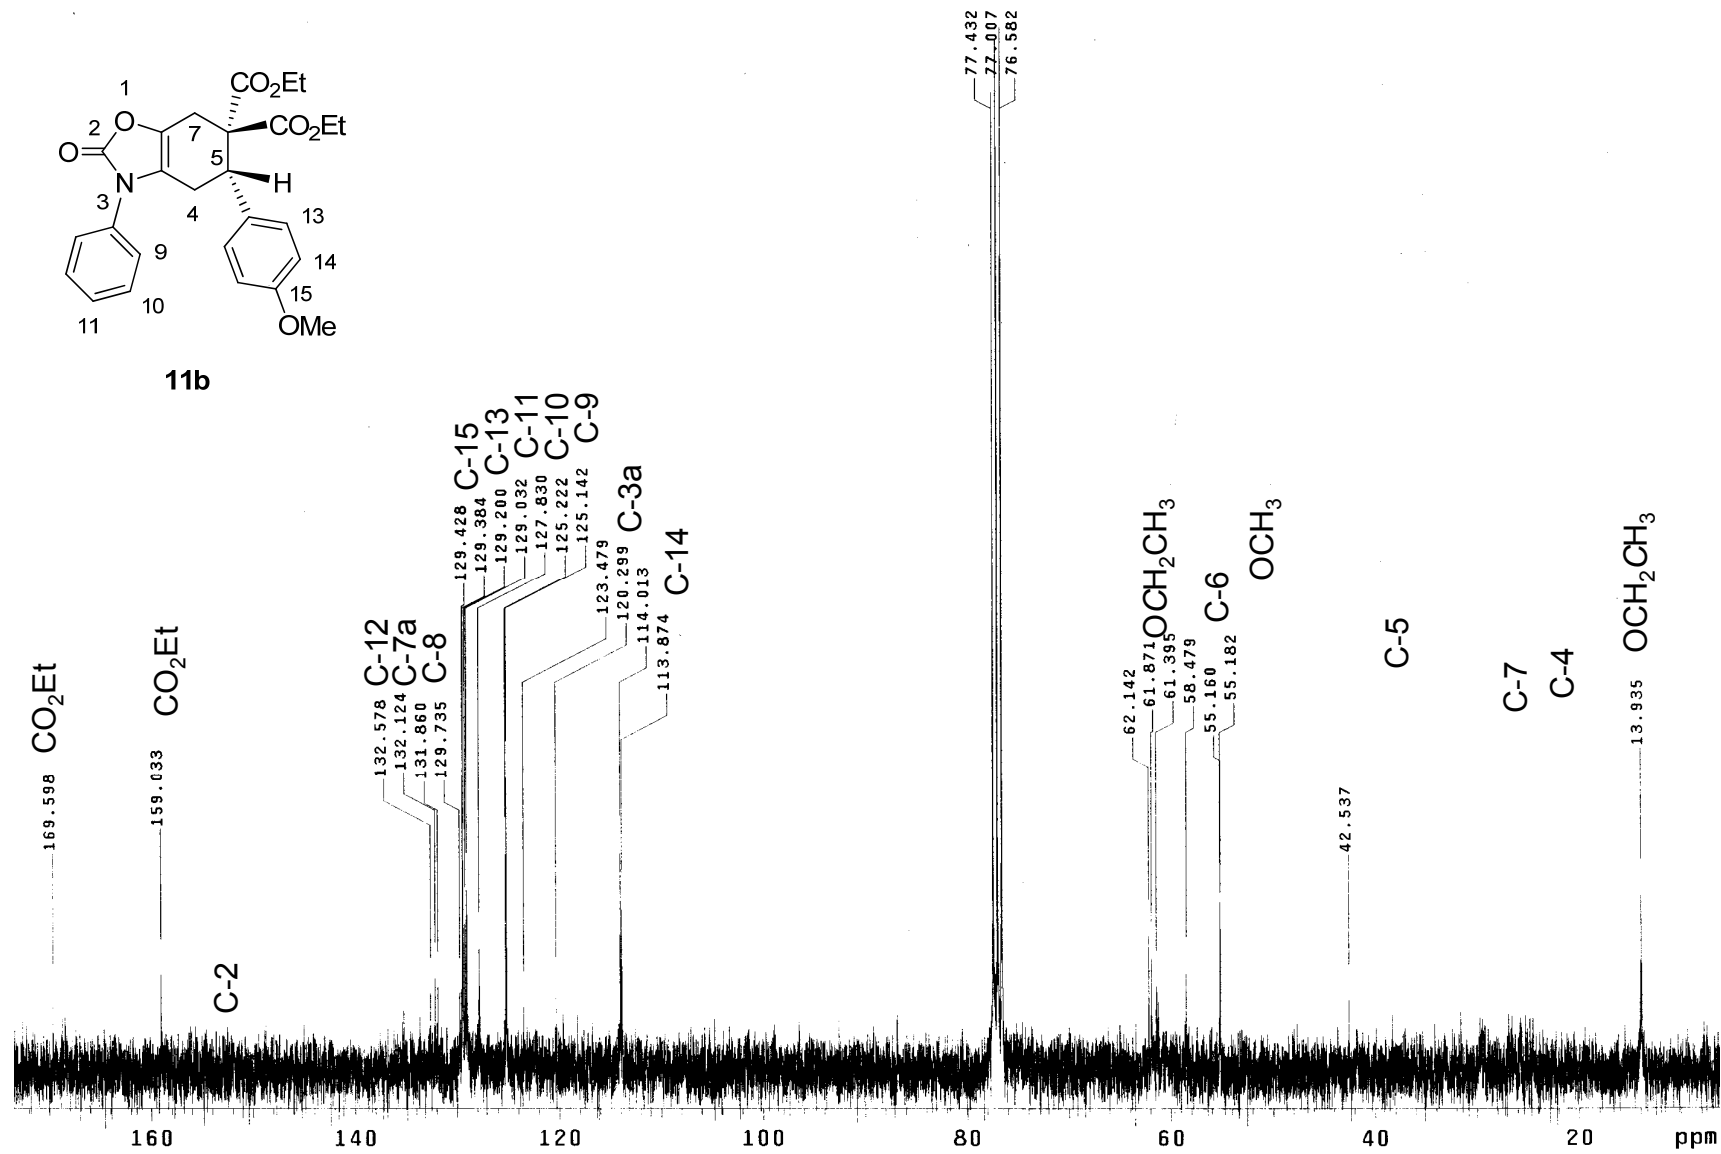**13C NMR (CDCl<sub>3</sub>) 11b**

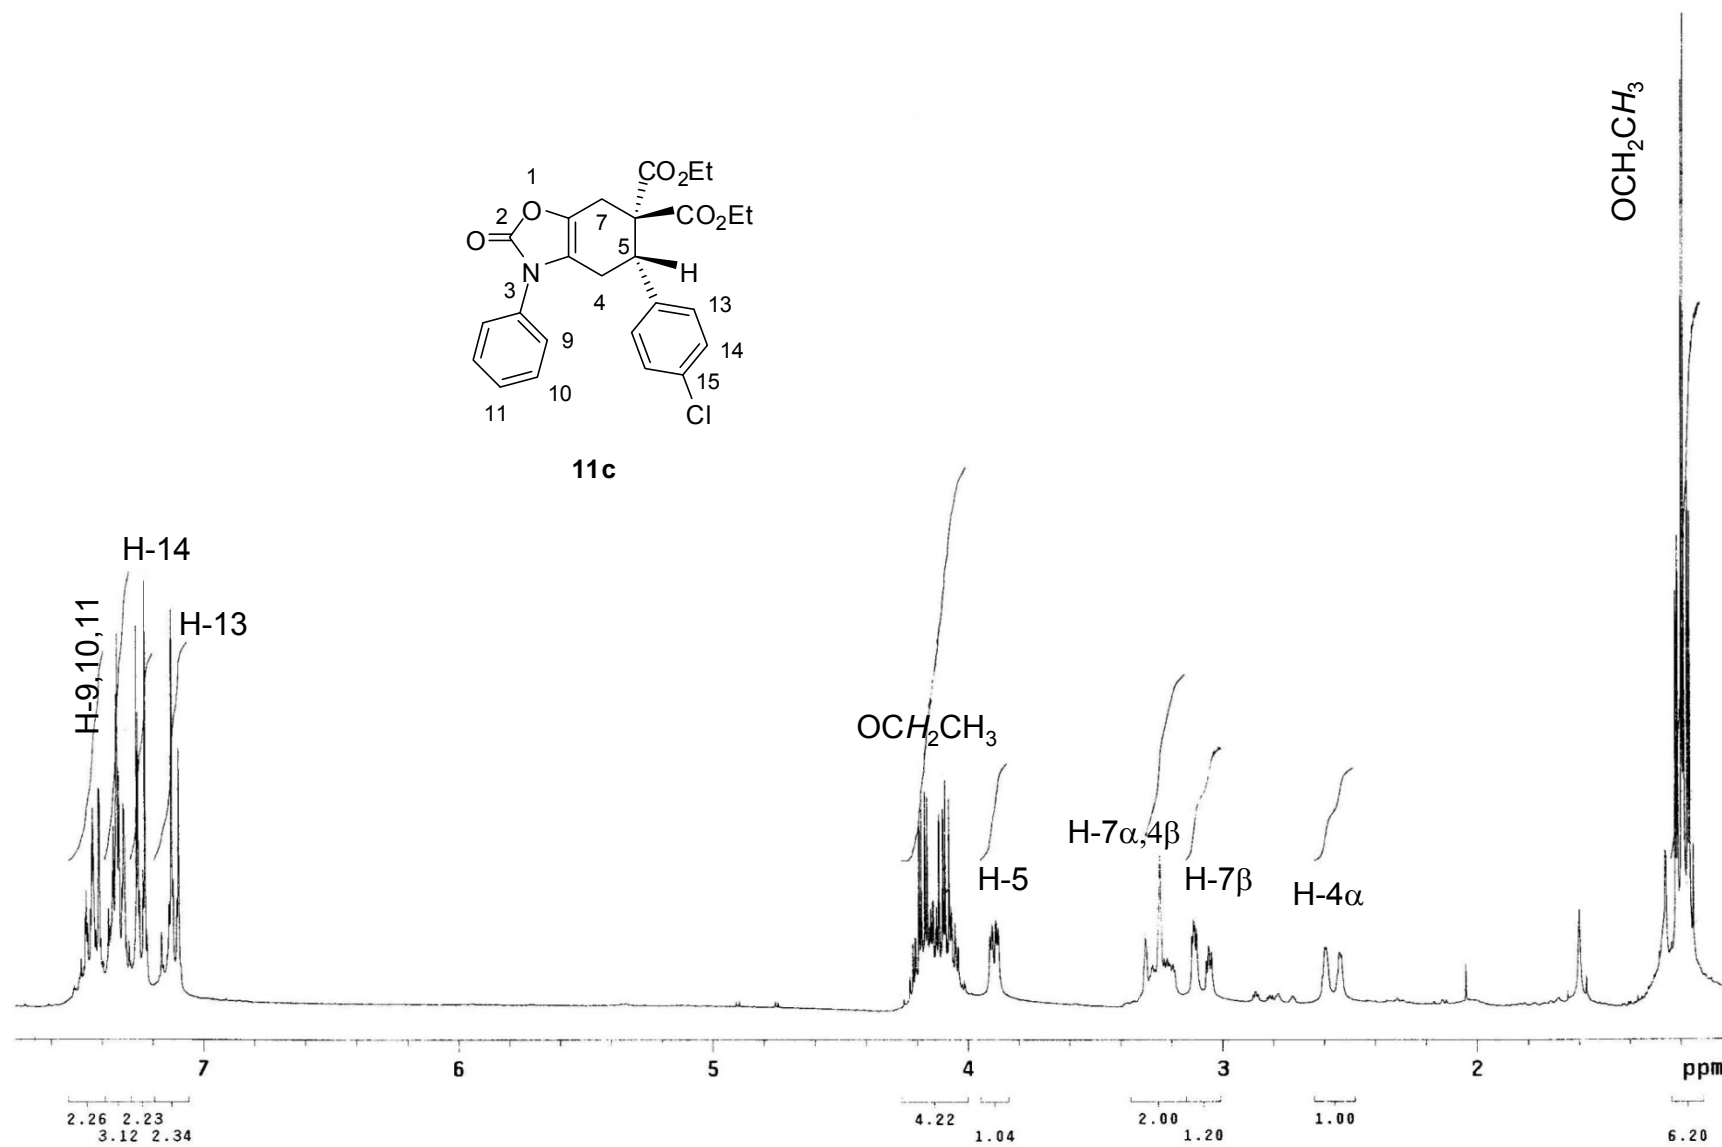 $^1\text{H}$  NMR ( $\text{CDCl}_3$ ) **11c**

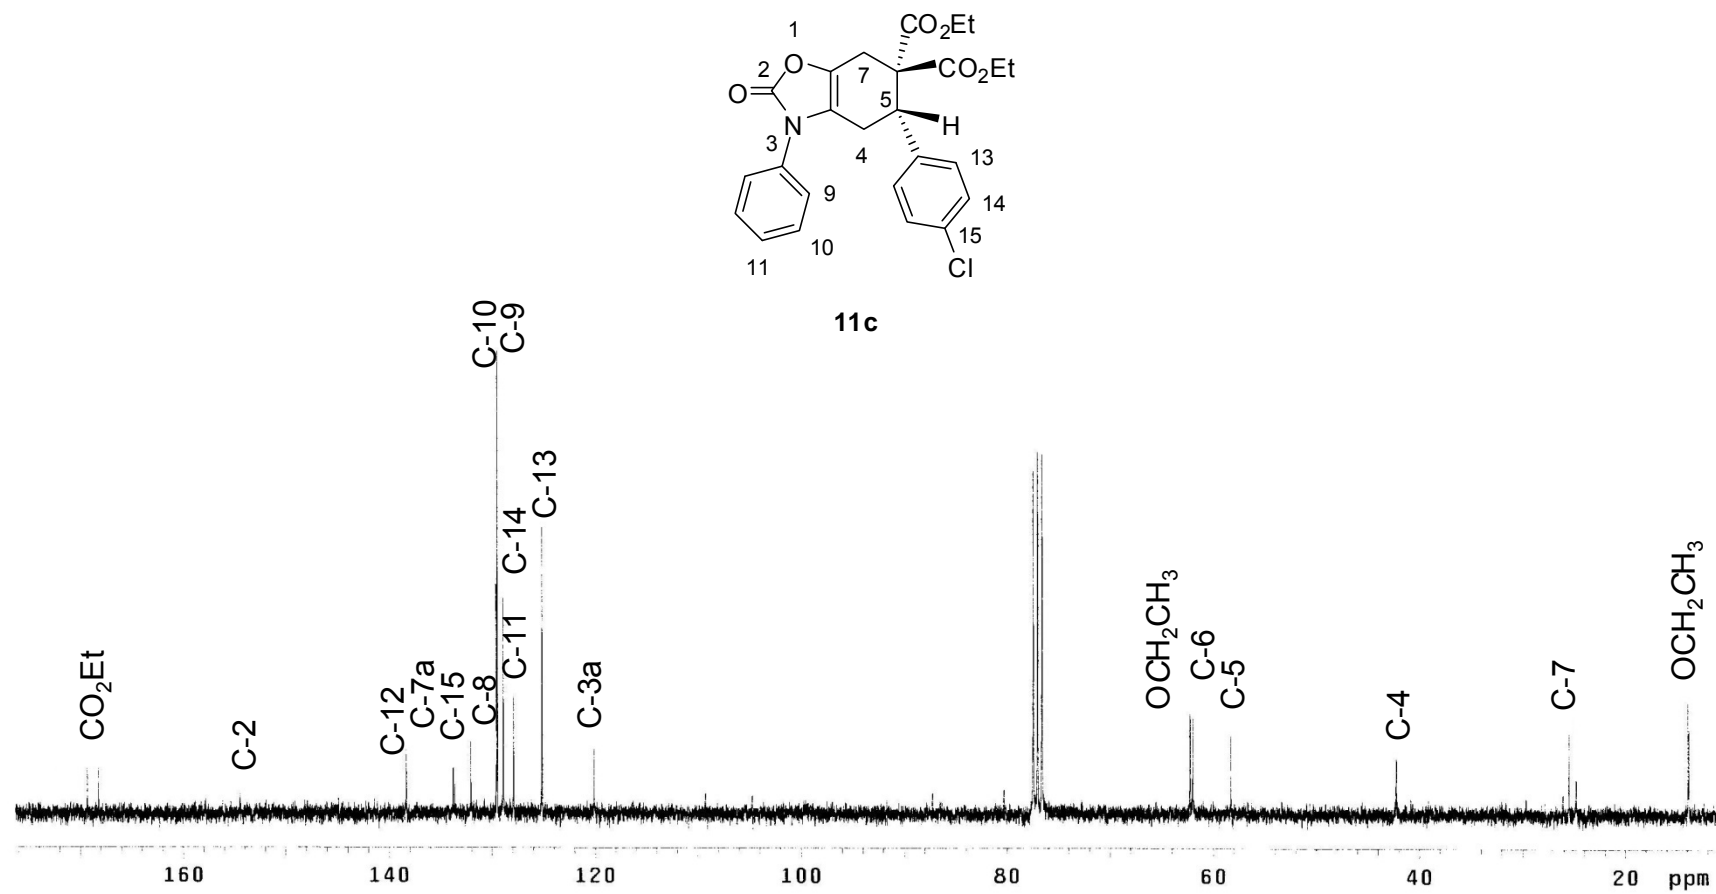

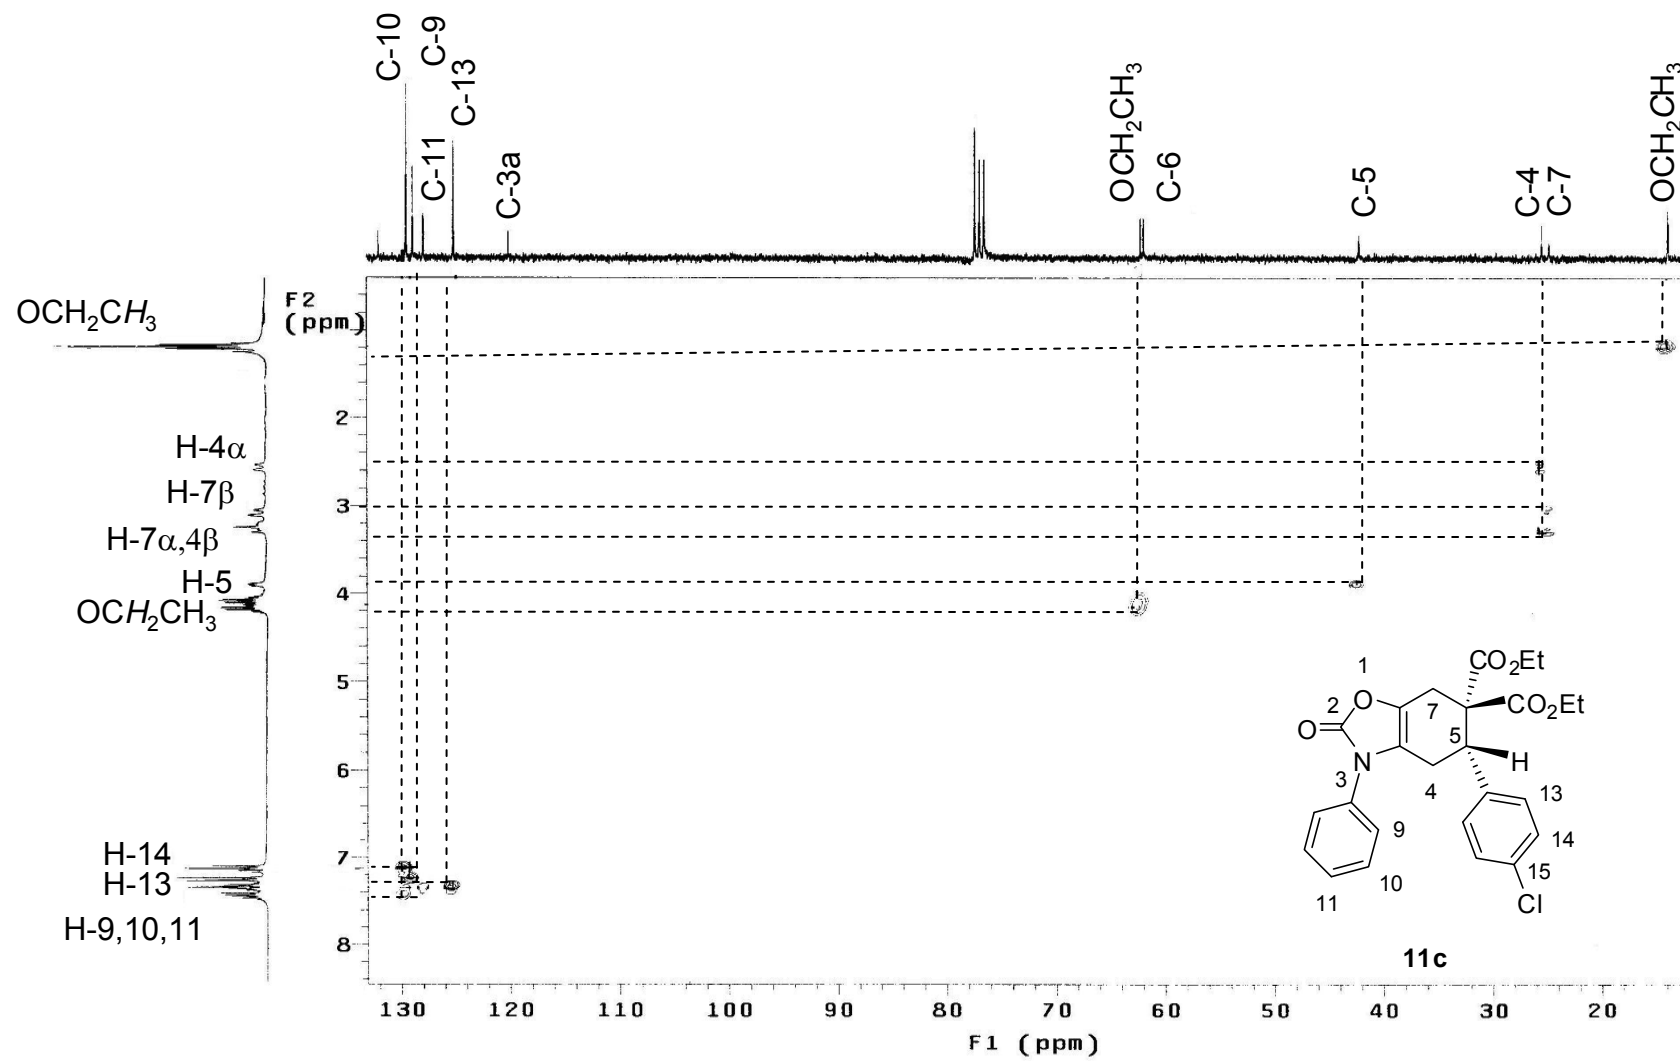HSQC experiment ( $\text{CDCl}_3$ ) **11c**

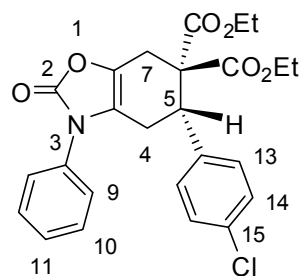

11c

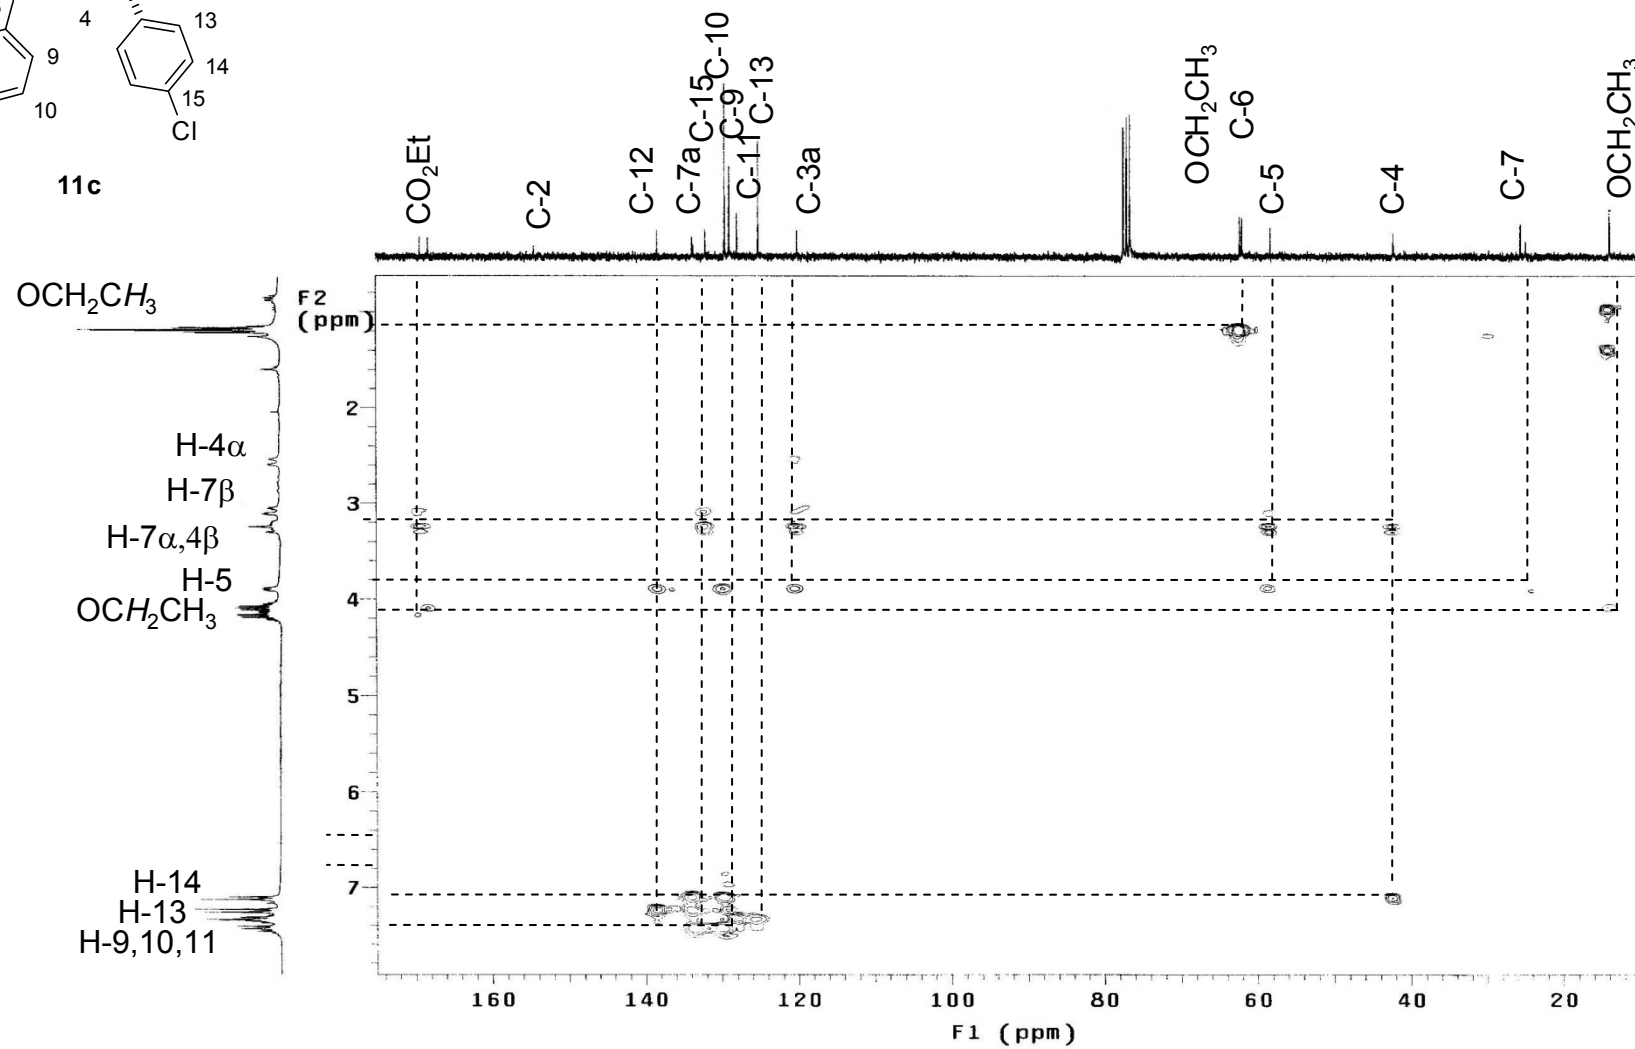HMBC experiment (CDCl<sub>3</sub>) 11c

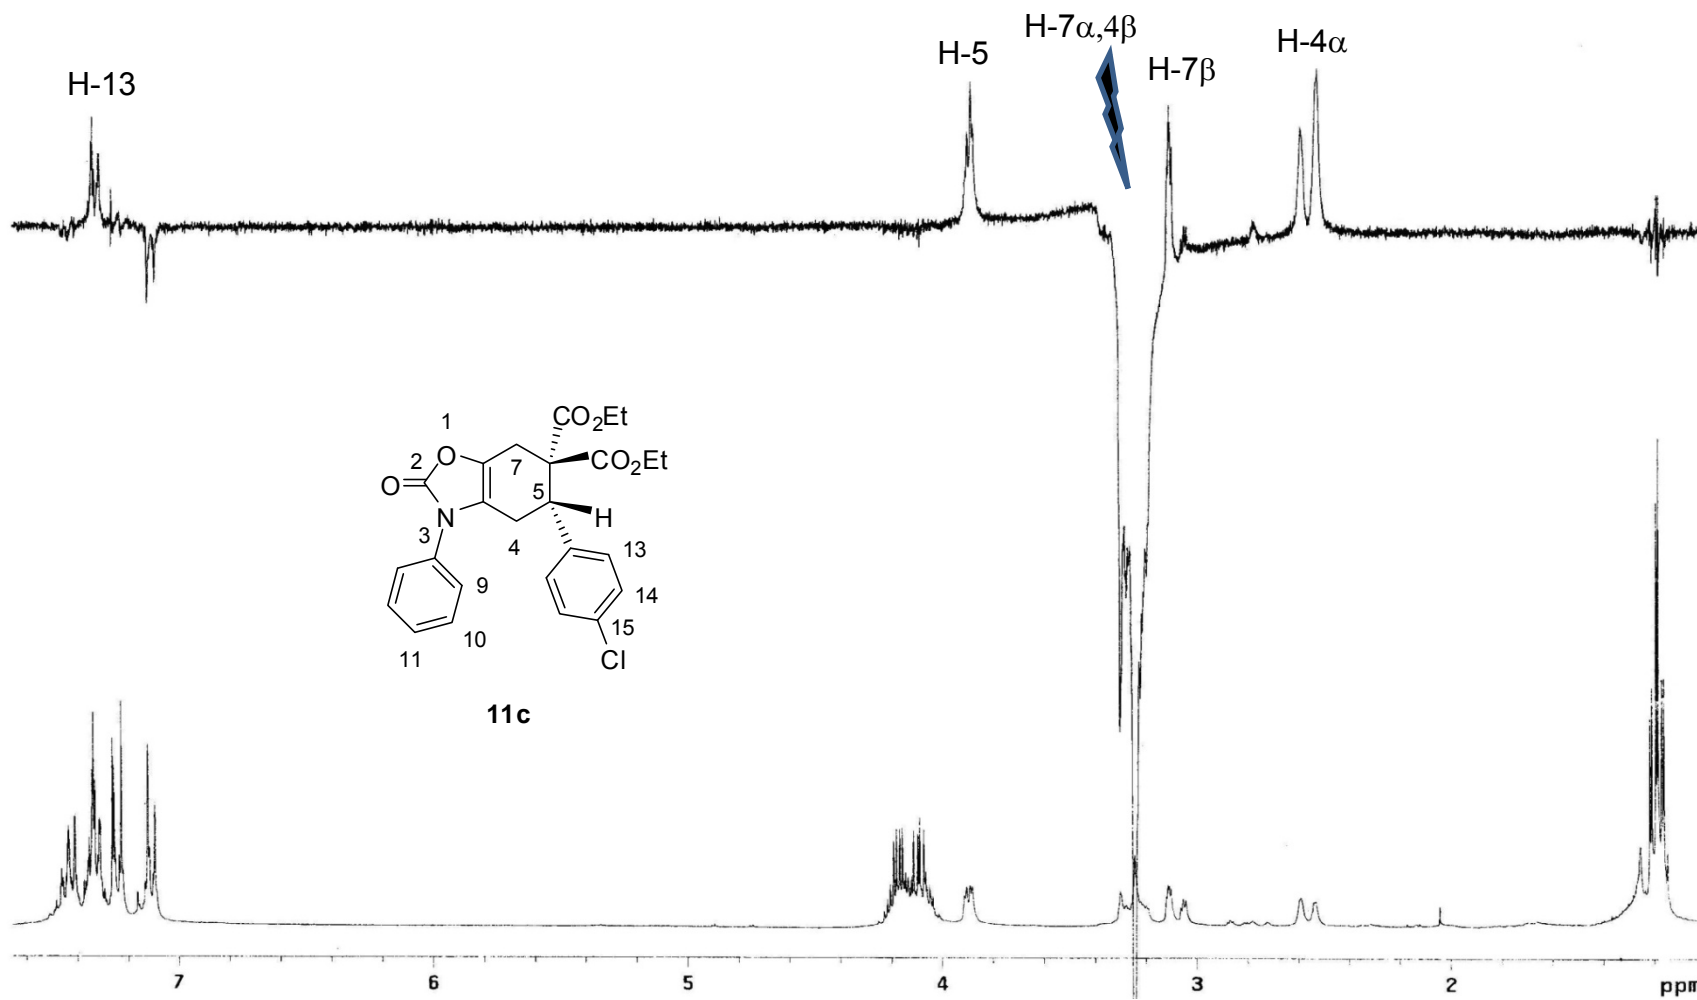



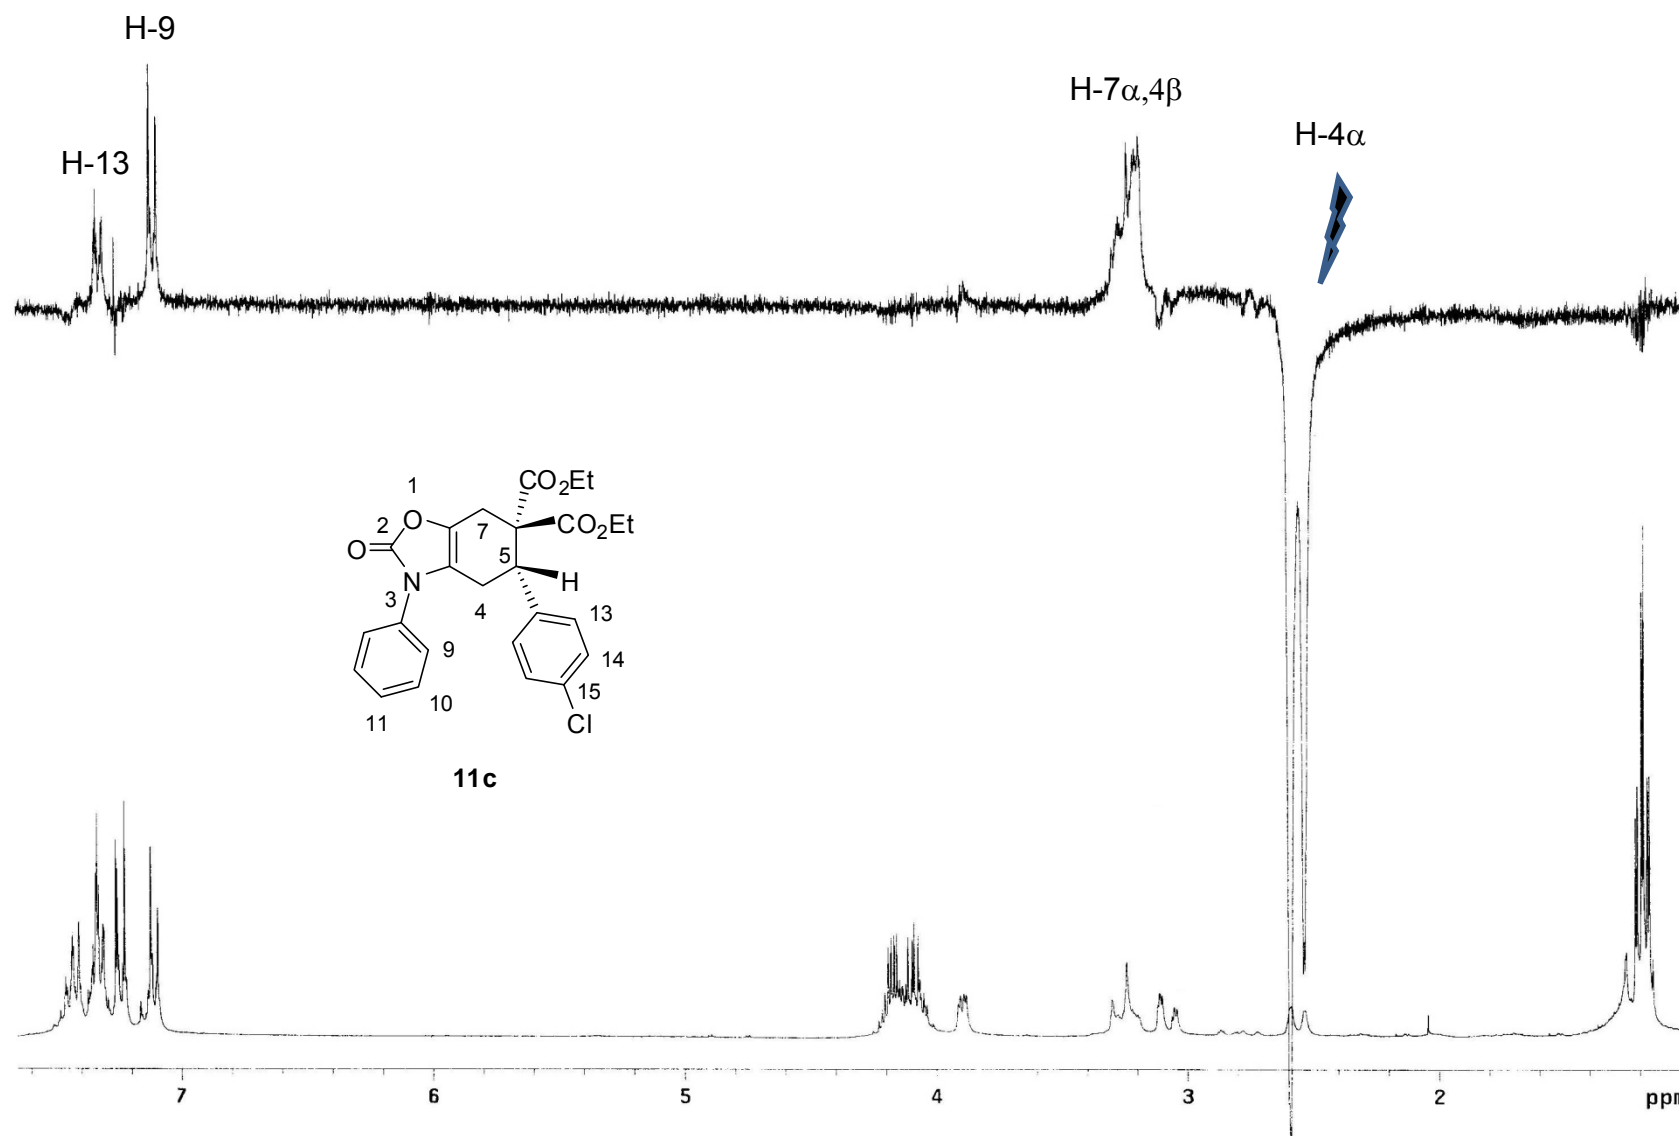NOE experiment (CDCl<sub>3</sub>) **11c**

S65

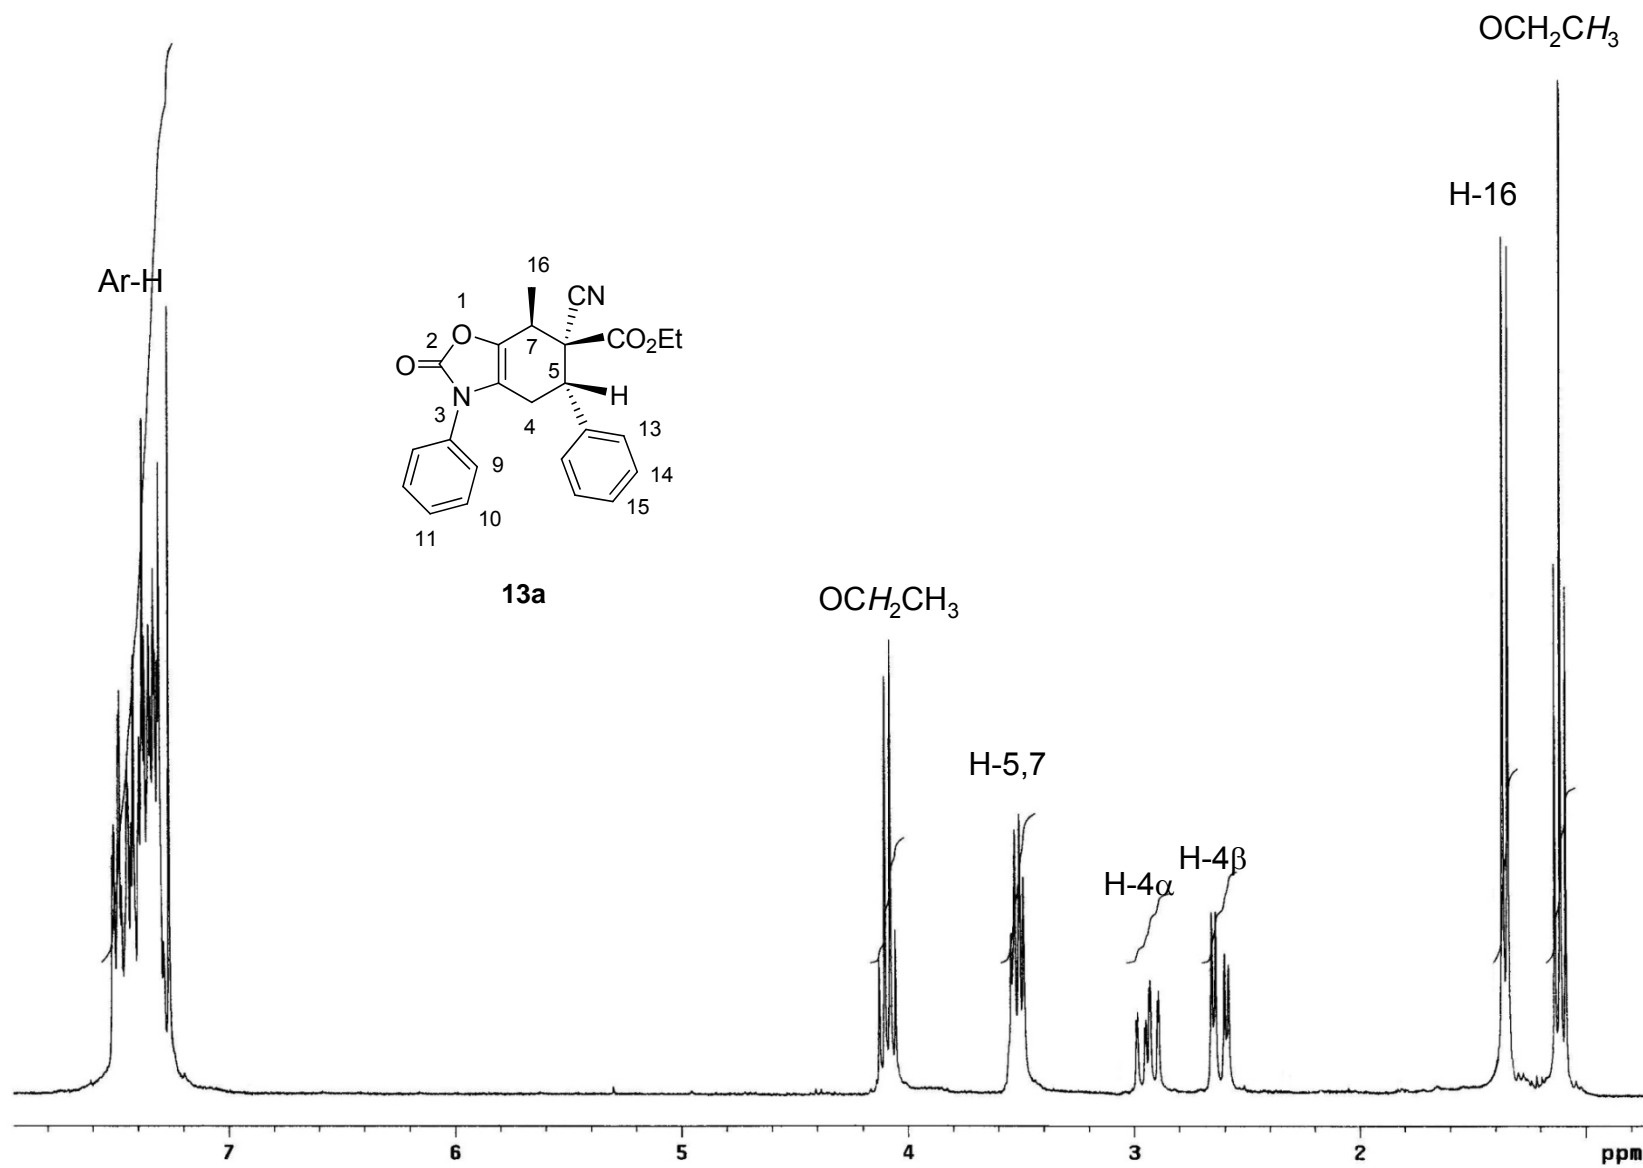

<sup>1</sup>H NMR (CDCl<sub>3</sub>) 13a

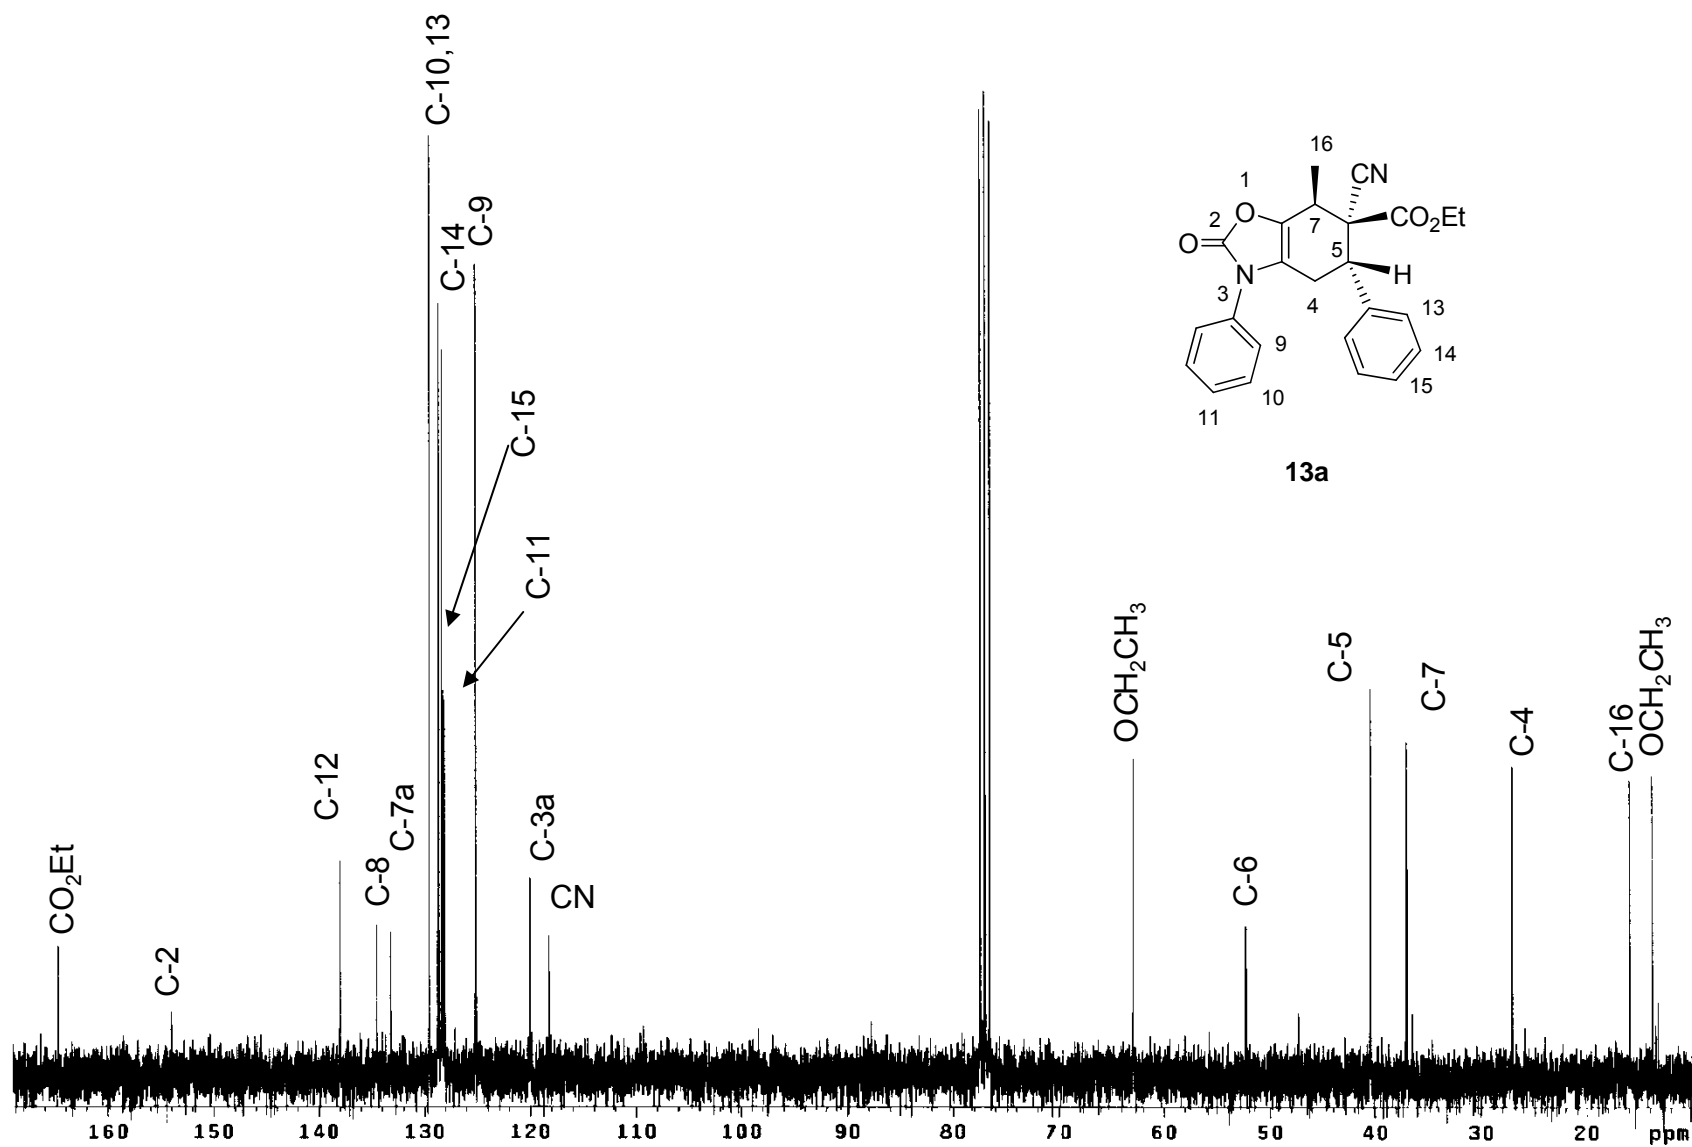 $^{13}\text{C}$  NMR (CDCl<sub>3</sub>) 13a

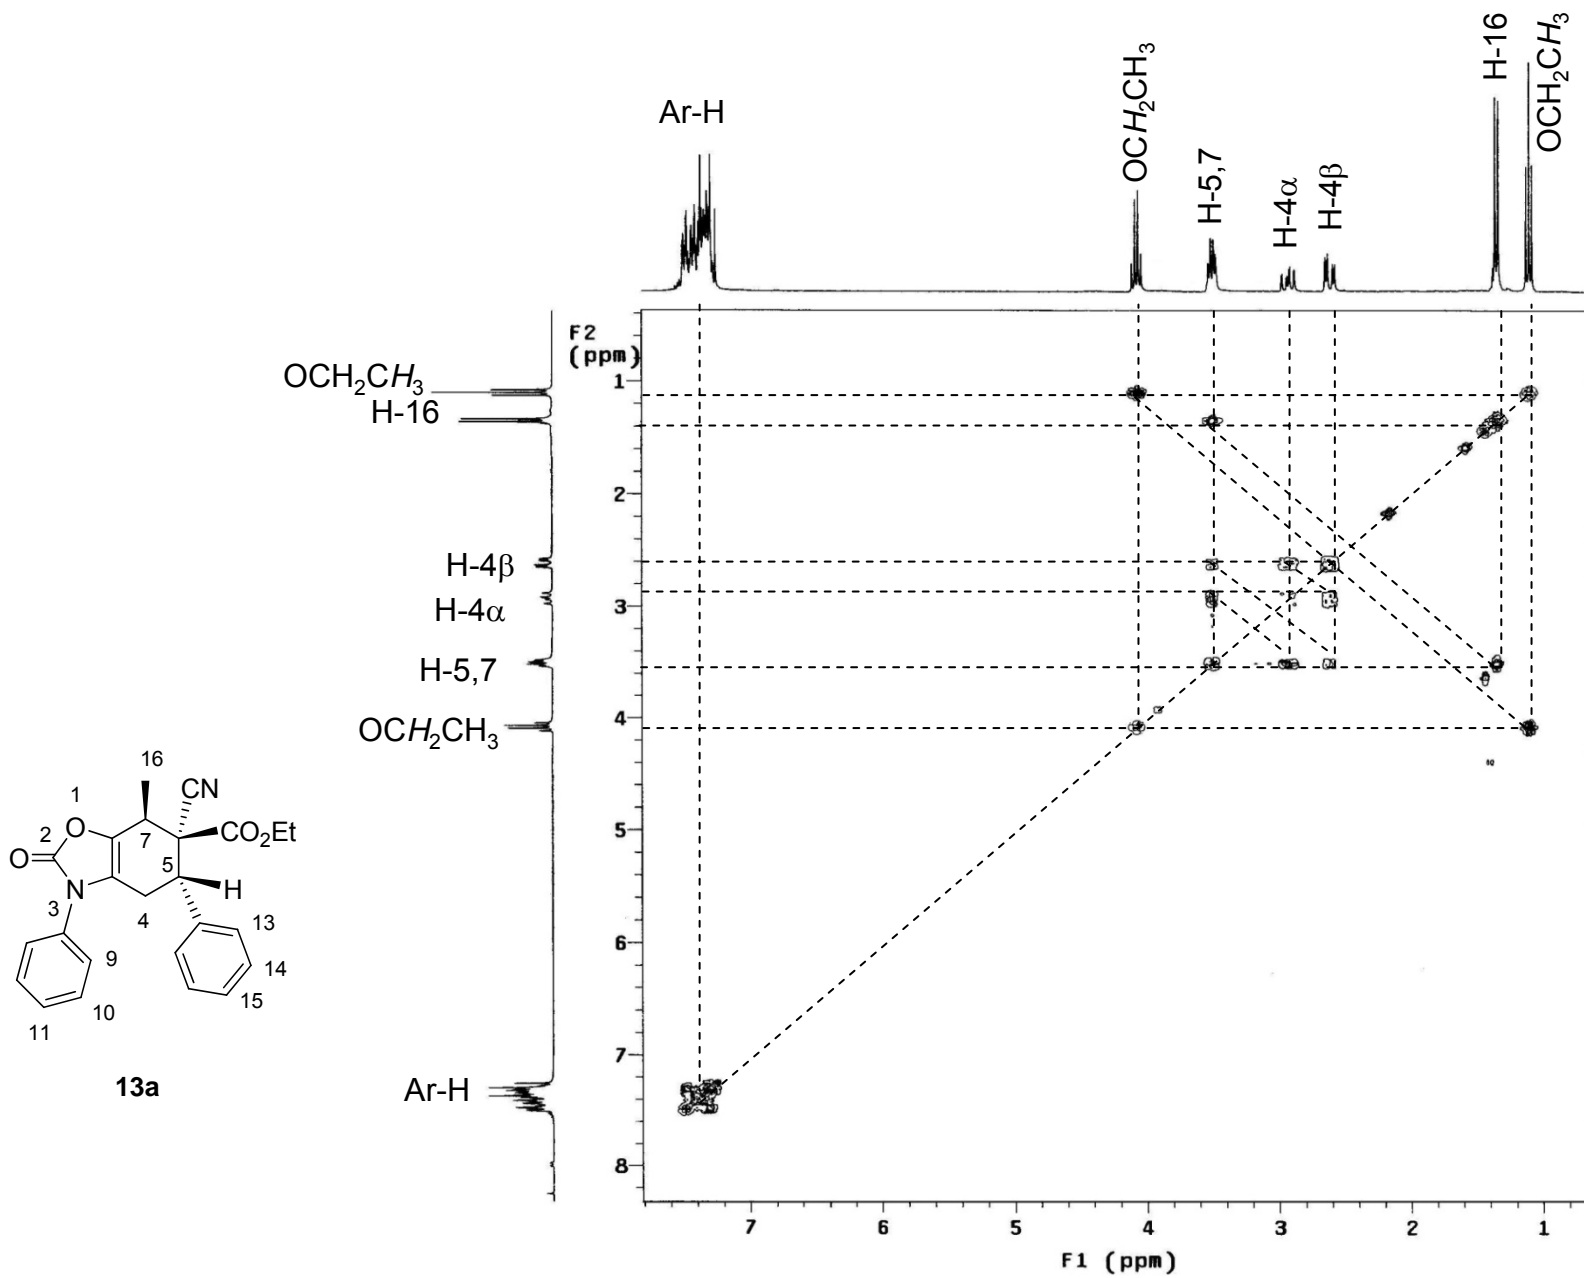

COSY experiment (CDCl<sub>3</sub>) **13a**

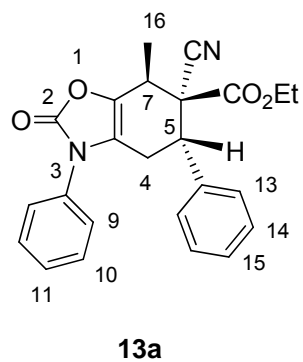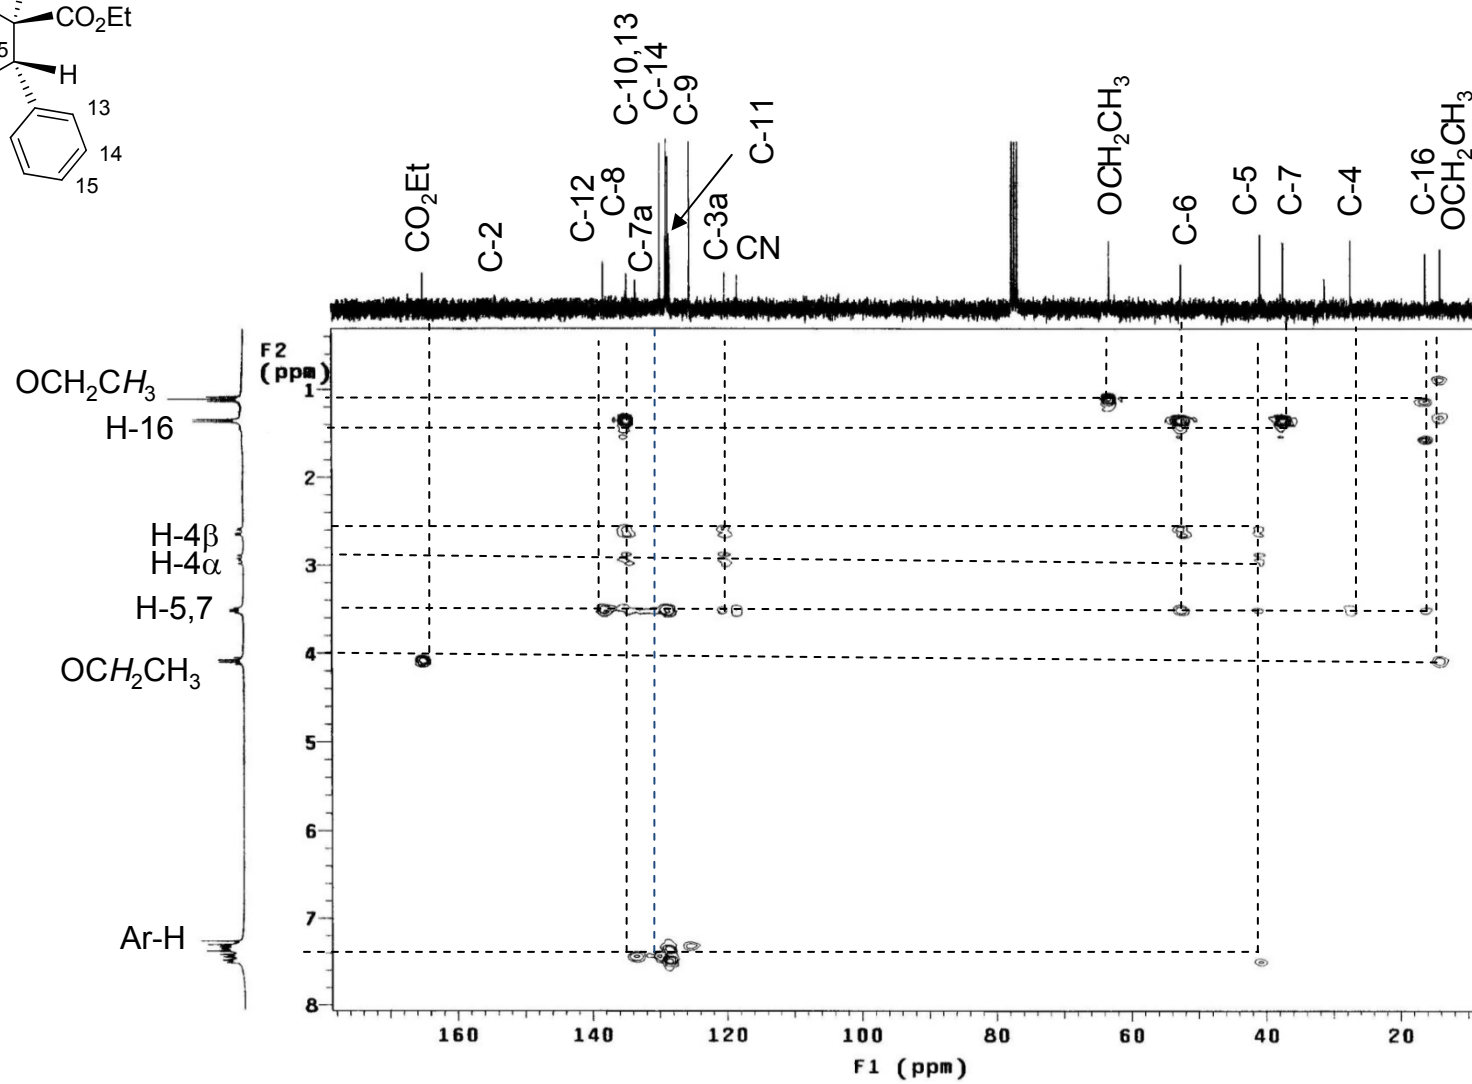

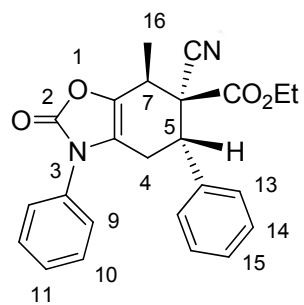**13a**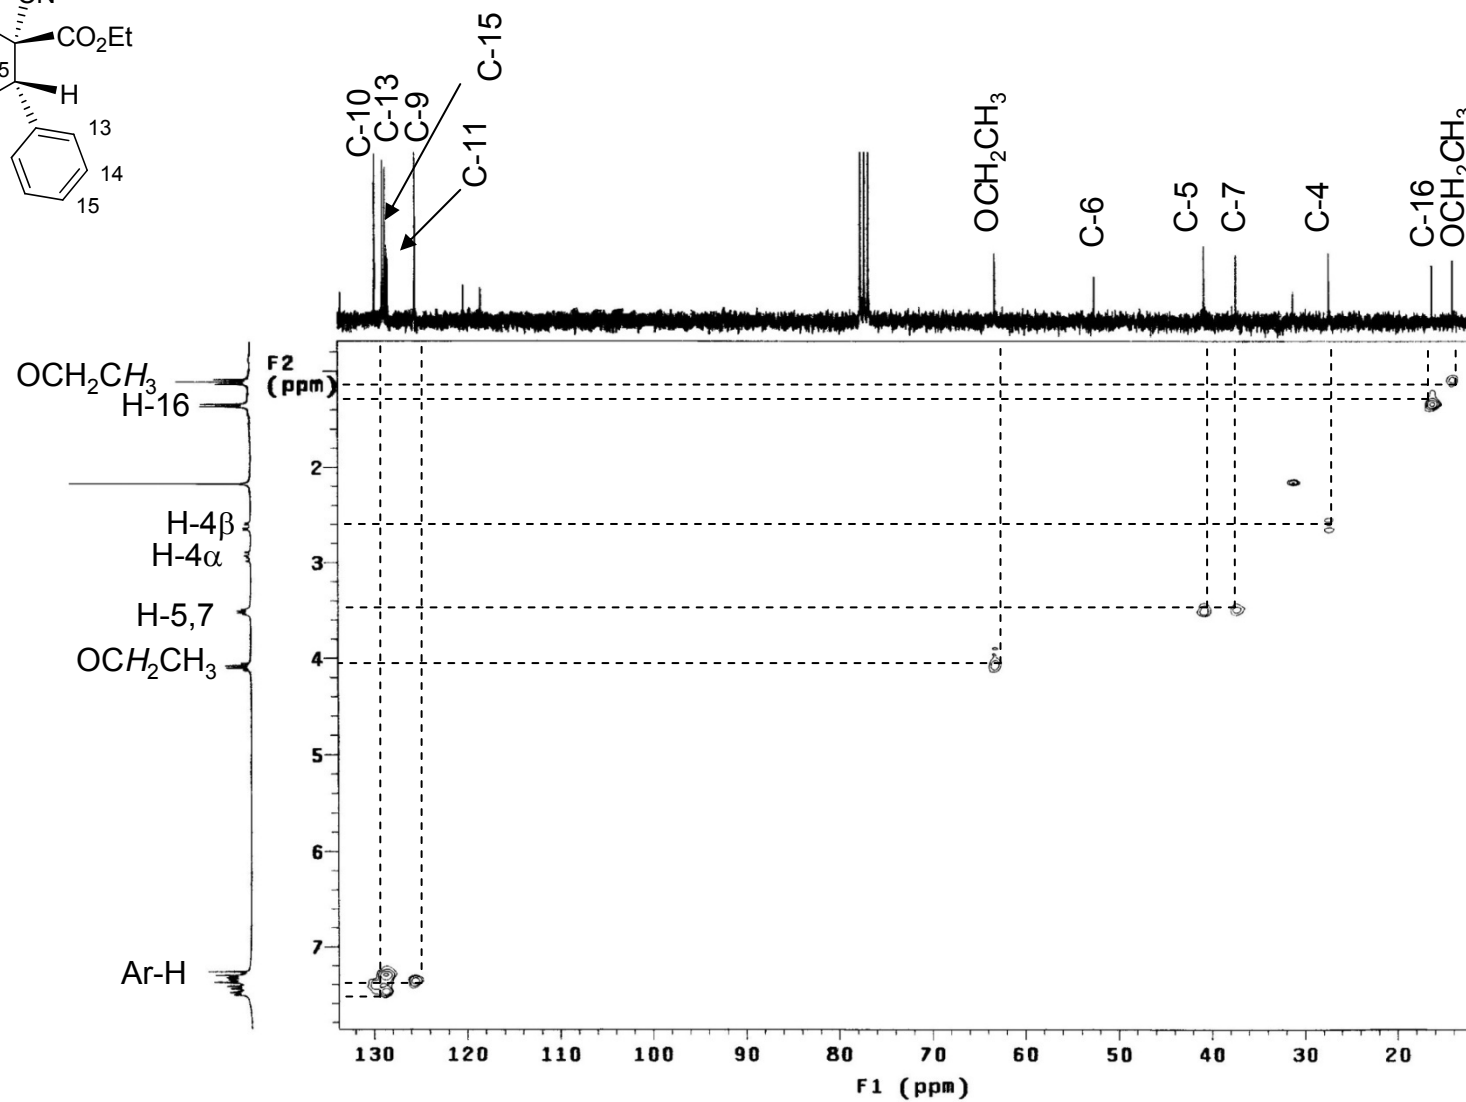HSQC experiment (CDCl<sub>3</sub>) **13a**

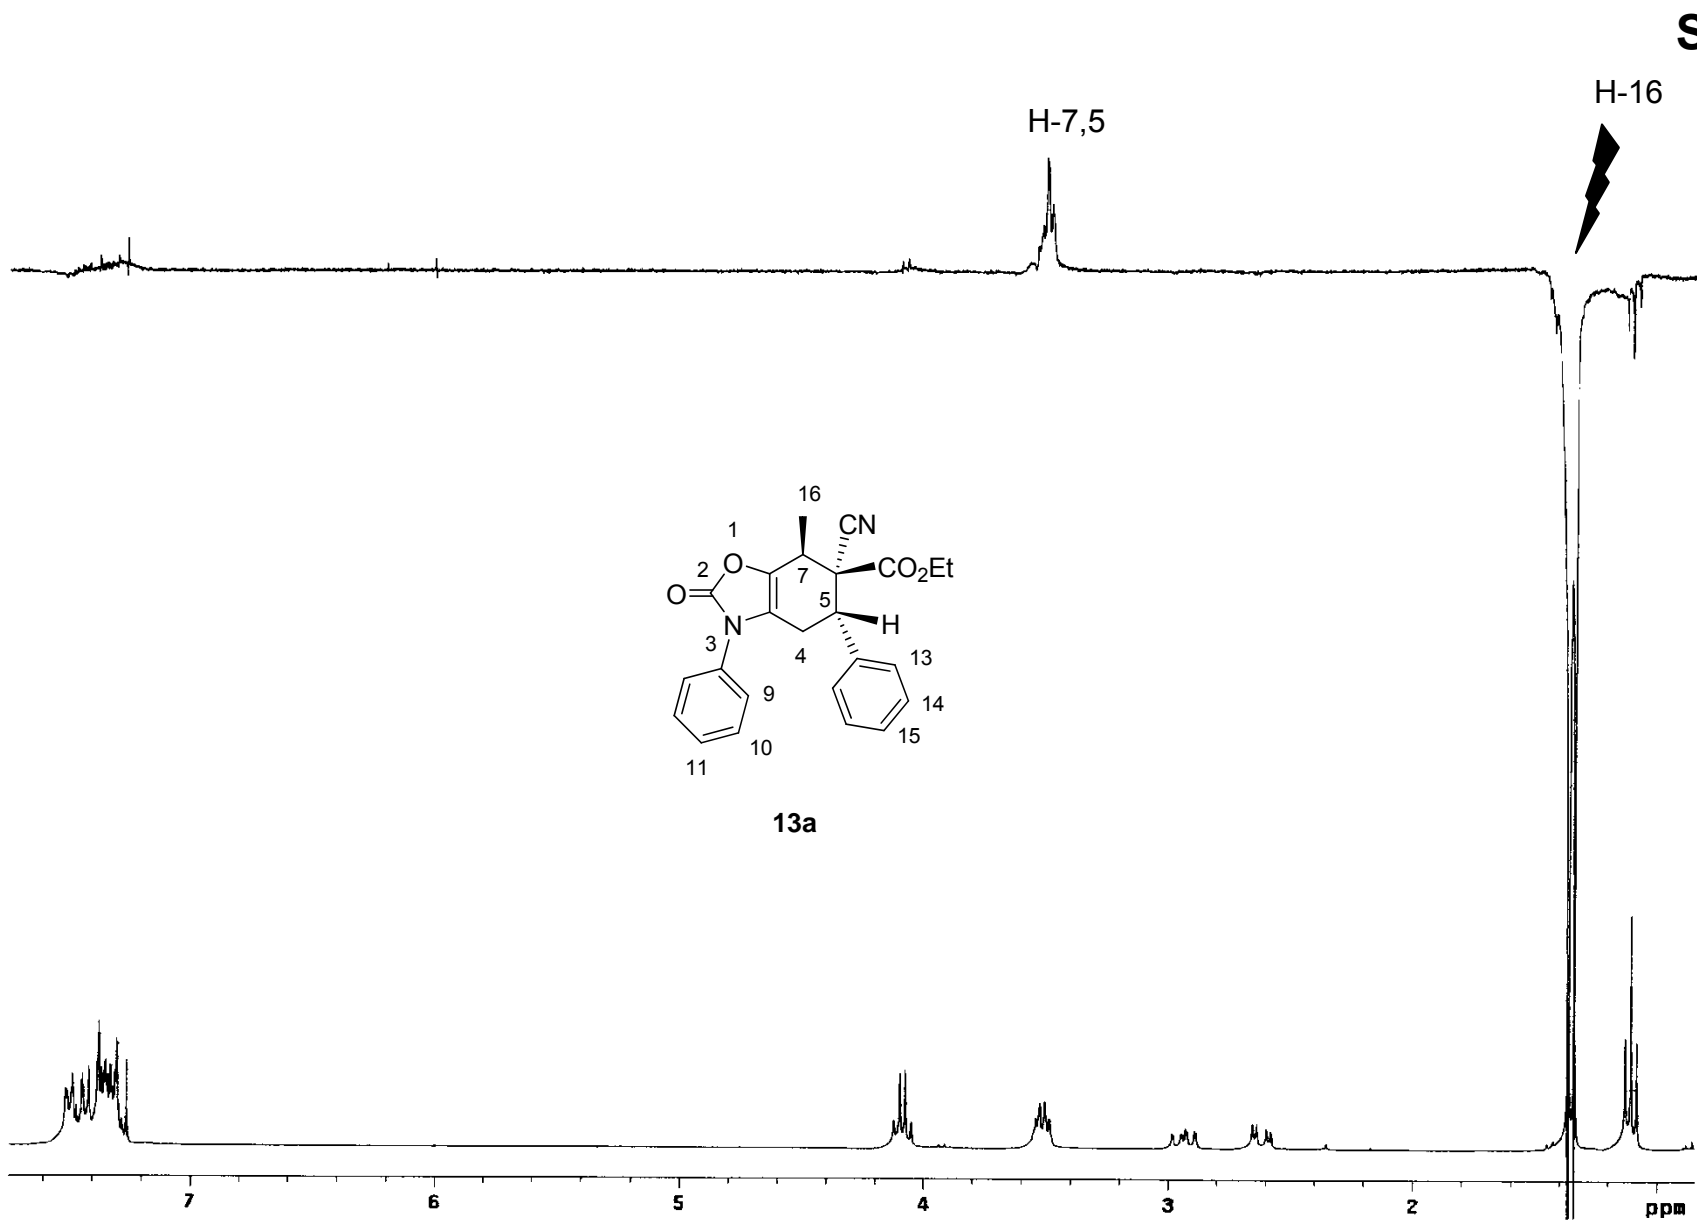

NOE experiment (CDCl<sub>3</sub>) 13a

S71

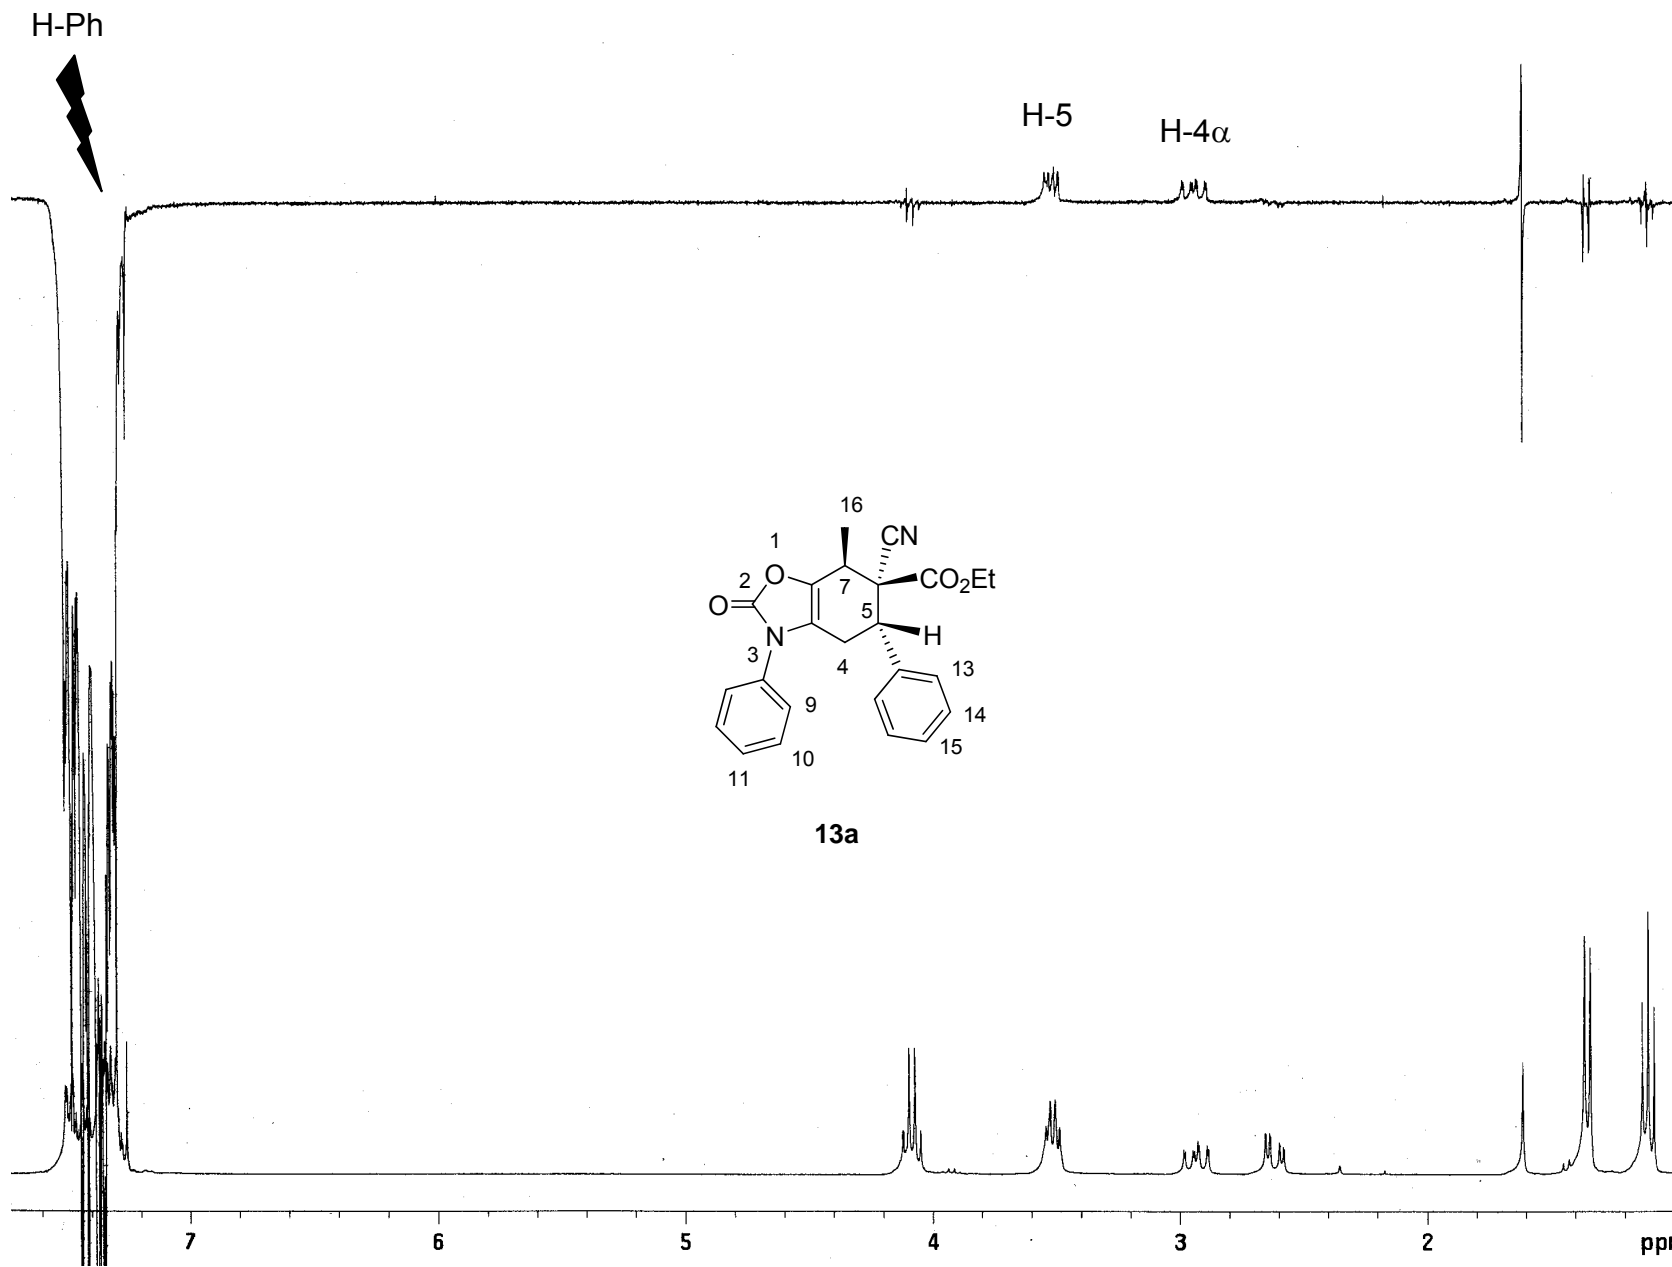

NOE experiment (CDCl<sub>3</sub>) 13a



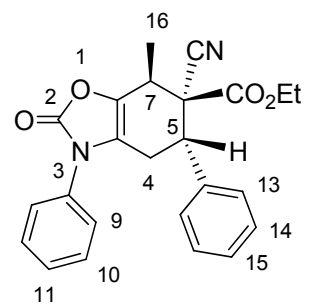**13a**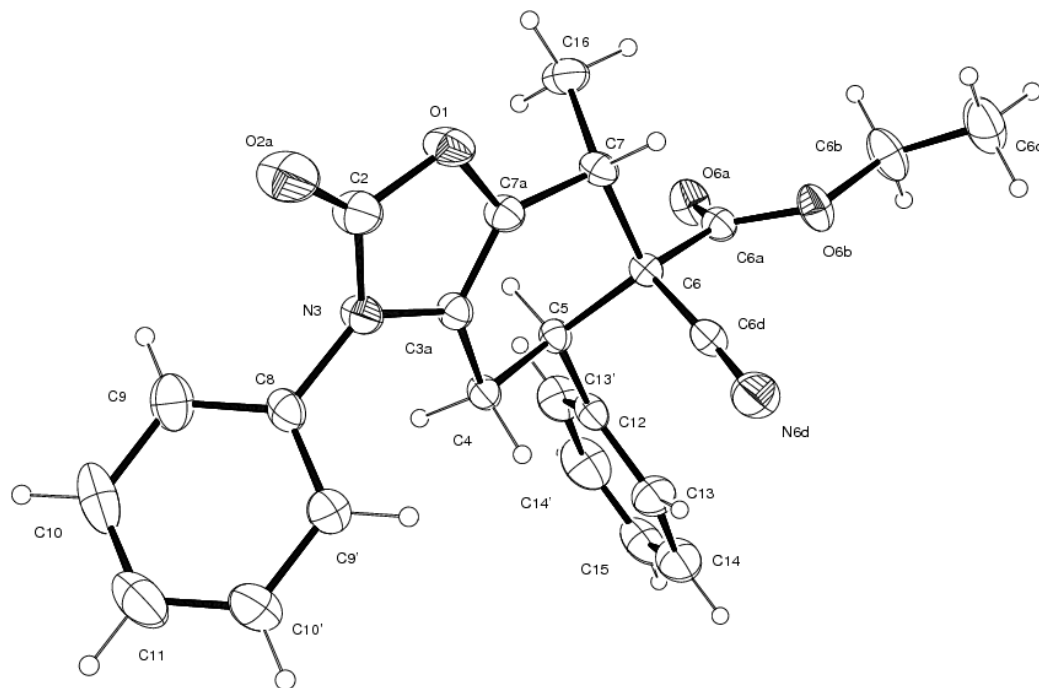X-Ray structure for **13a**

Table 1. Crystal data and structure refinement for compound **13a**.

|                                 |                                                               |                 |
|---------------------------------|---------------------------------------------------------------|-----------------|
| Identification code             | 0004-fdr                                                      |                 |
| Empirical formula               | C <sub>24</sub> H <sub>22</sub> N <sub>2</sub> O <sub>4</sub> |                 |
| Formula weight                  | 402.44                                                        |                 |
| Temperature                     | 292(2) K                                                      |                 |
| Wavelength                      | 0.71073 Å                                                     |                 |
| Crystal system                  | Monoclinic                                                    |                 |
| Space group                     | P 1 21/c 1                                                    |                 |
| Unit cell dimensions            | a = 11.8041(2) Å                                              | α = 90°.        |
|                                 | b = 11.5167(3) Å                                              | β = 95.742(2)°. |
|                                 | c = 16.0207(4) Å                                              | γ = 90°.        |
| Volume                          | 2166.99(9) Å <sup>3</sup>                                     |                 |
| Z                               | 4                                                             |                 |
| Density (calculated)            | 1.234 Mg/m <sup>3</sup>                                       |                 |
| Absorption coefficient          | 0.085 mm <sup>-1</sup>                                        |                 |
| F(000)                          | 848                                                           |                 |
| Crystal size                    | 0.24 x 0.18 x 0.14 mm <sup>3</sup>                            |                 |
| Theta range for data collection | 2.48 to 32.53°.                                               |                 |
| Index ranges                    | -17 ≤ h ≤ 17, -17 ≤ k ≤ 15, -23 ≤ l ≤ 19                      |                 |
| Reflections collected           | 19540                                                         |                 |
| Independent reflections         | 7117 [R(int) = 0.0417]                                        |                 |
| Completeness to theta = 27.50°  | 99.5 %                                                        |                 |

|                                      |                                             |
|--------------------------------------|---------------------------------------------|
| Max. and min. transmission           | 0.9882 and 0.9800                           |
| Refinement method                    | Full-matrix least-squares on F <sup>2</sup> |
| Data / restraints / parameters       | 7117 / 0 / 273                              |
| Goodness-of-fit on F <sup>2</sup>    | 0.936                                       |
| Final R indices [ $I > 2\sigma(I)$ ] | R1 = 0.0641, wR2 = 0.1335                   |
| R indices (all data)                 | R1 = 0.1531, wR2 = 0.1536                   |
| Largest diff. peak and hole          | 0.266 and -0.148 e.Å <sup>-3</sup>          |

File: Ines 402 ID IE MI2Date Run: 02-01-2008 (Time Run: 12:20:06)  
 Sample: Ines MI2  
 Instrument: JEOL GCmate  
 Inlet: Direct Probe Ionization mode: EI+

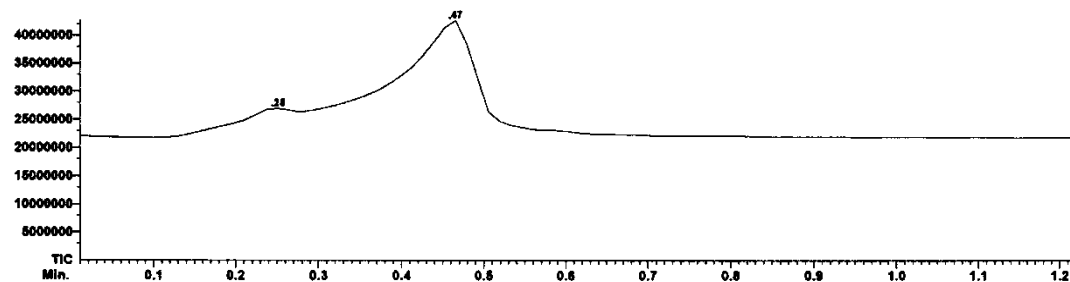

Scan: 33-36

R.T.: .46

Base: m/z 402; 44.6%FS TIC: 1521992

#Ions: 630

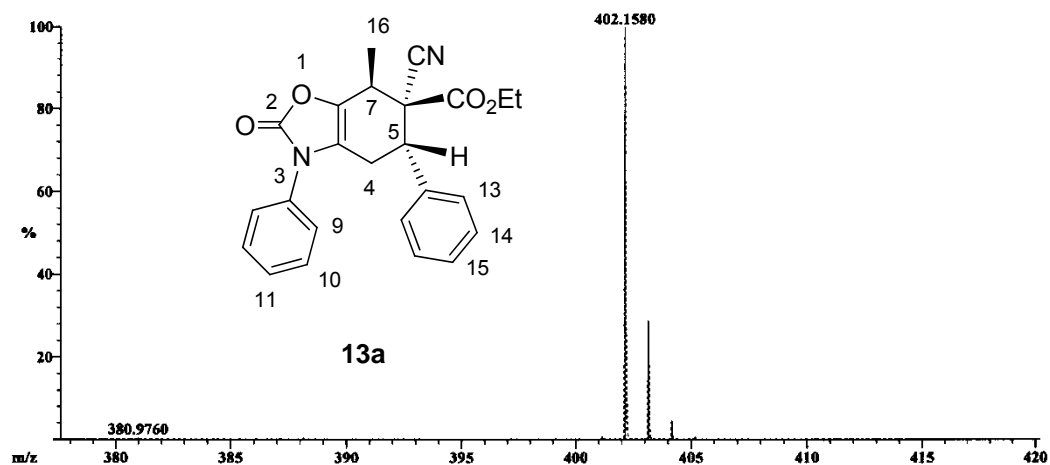Selected Isotopes : N<sub>0-3</sub> O<sub>0-5</sub> C<sub>0-26</sub> H<sub>0-25</sub>

Error Limit : 1 mmu

| <u>Measured Mass</u> | <u>% Base</u> | <u>Formula</u>                                                | <u>Calculated Mass</u> | <u>Error</u> |
|----------------------|---------------|---------------------------------------------------------------|------------------------|--------------|
| 402.15802            | 100.0%        | C <sub>24</sub> H <sub>22</sub> N <sub>2</sub> O <sub>4</sub> | 402.15796              | 0.1          |

HRMS 13a

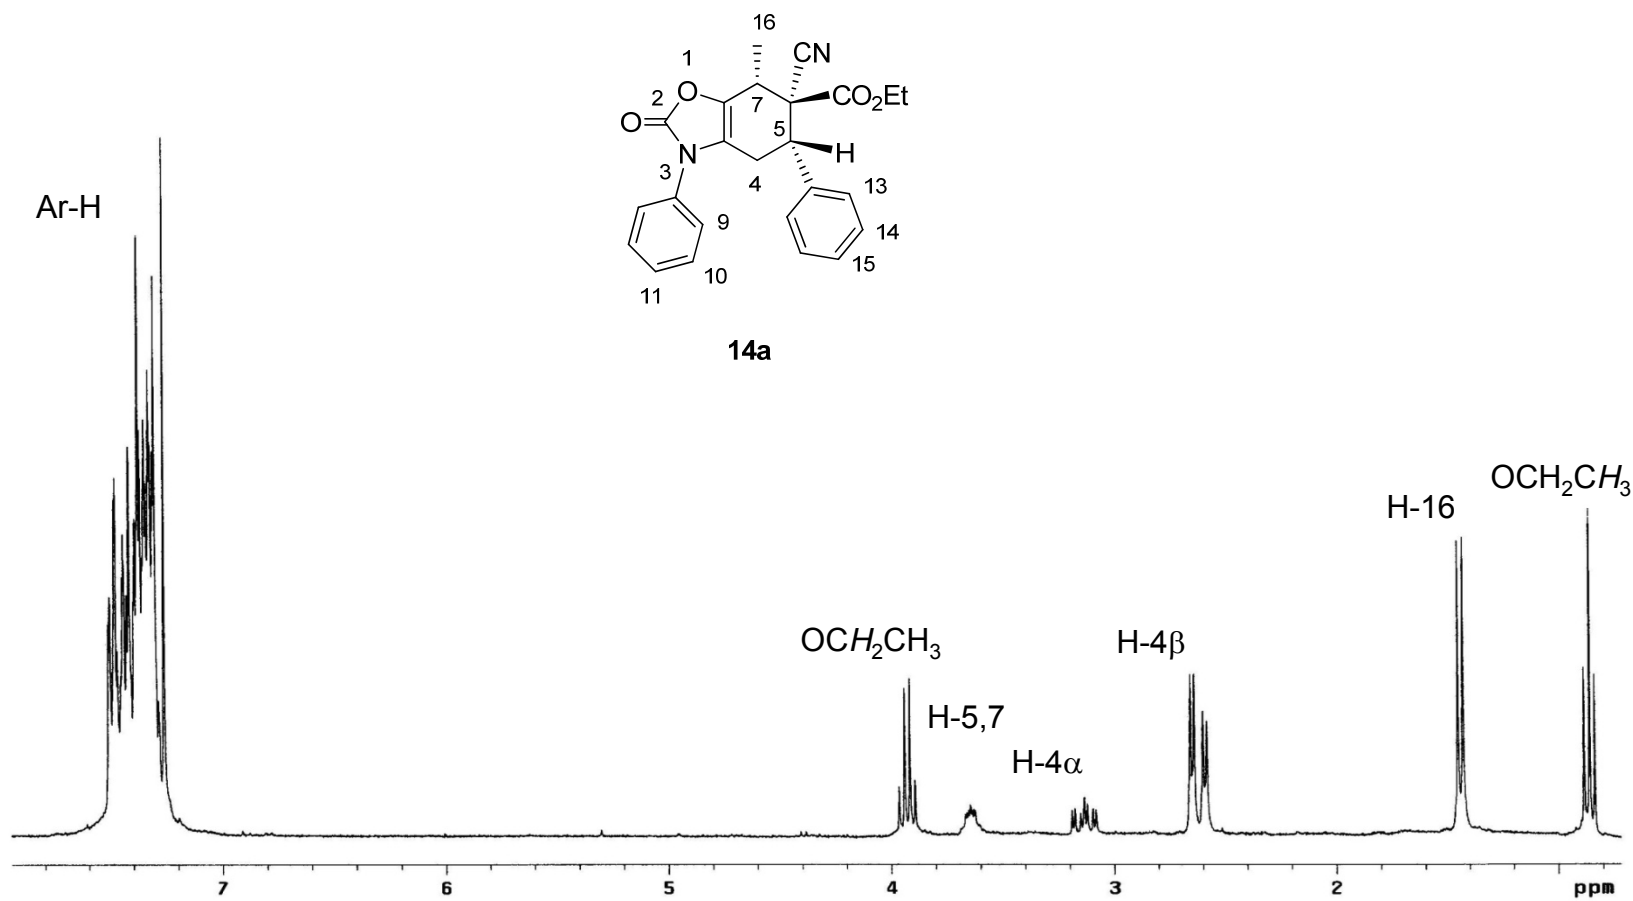 $^1\text{H}$  NMR ( $\text{CDCl}_3$ ) **14a**

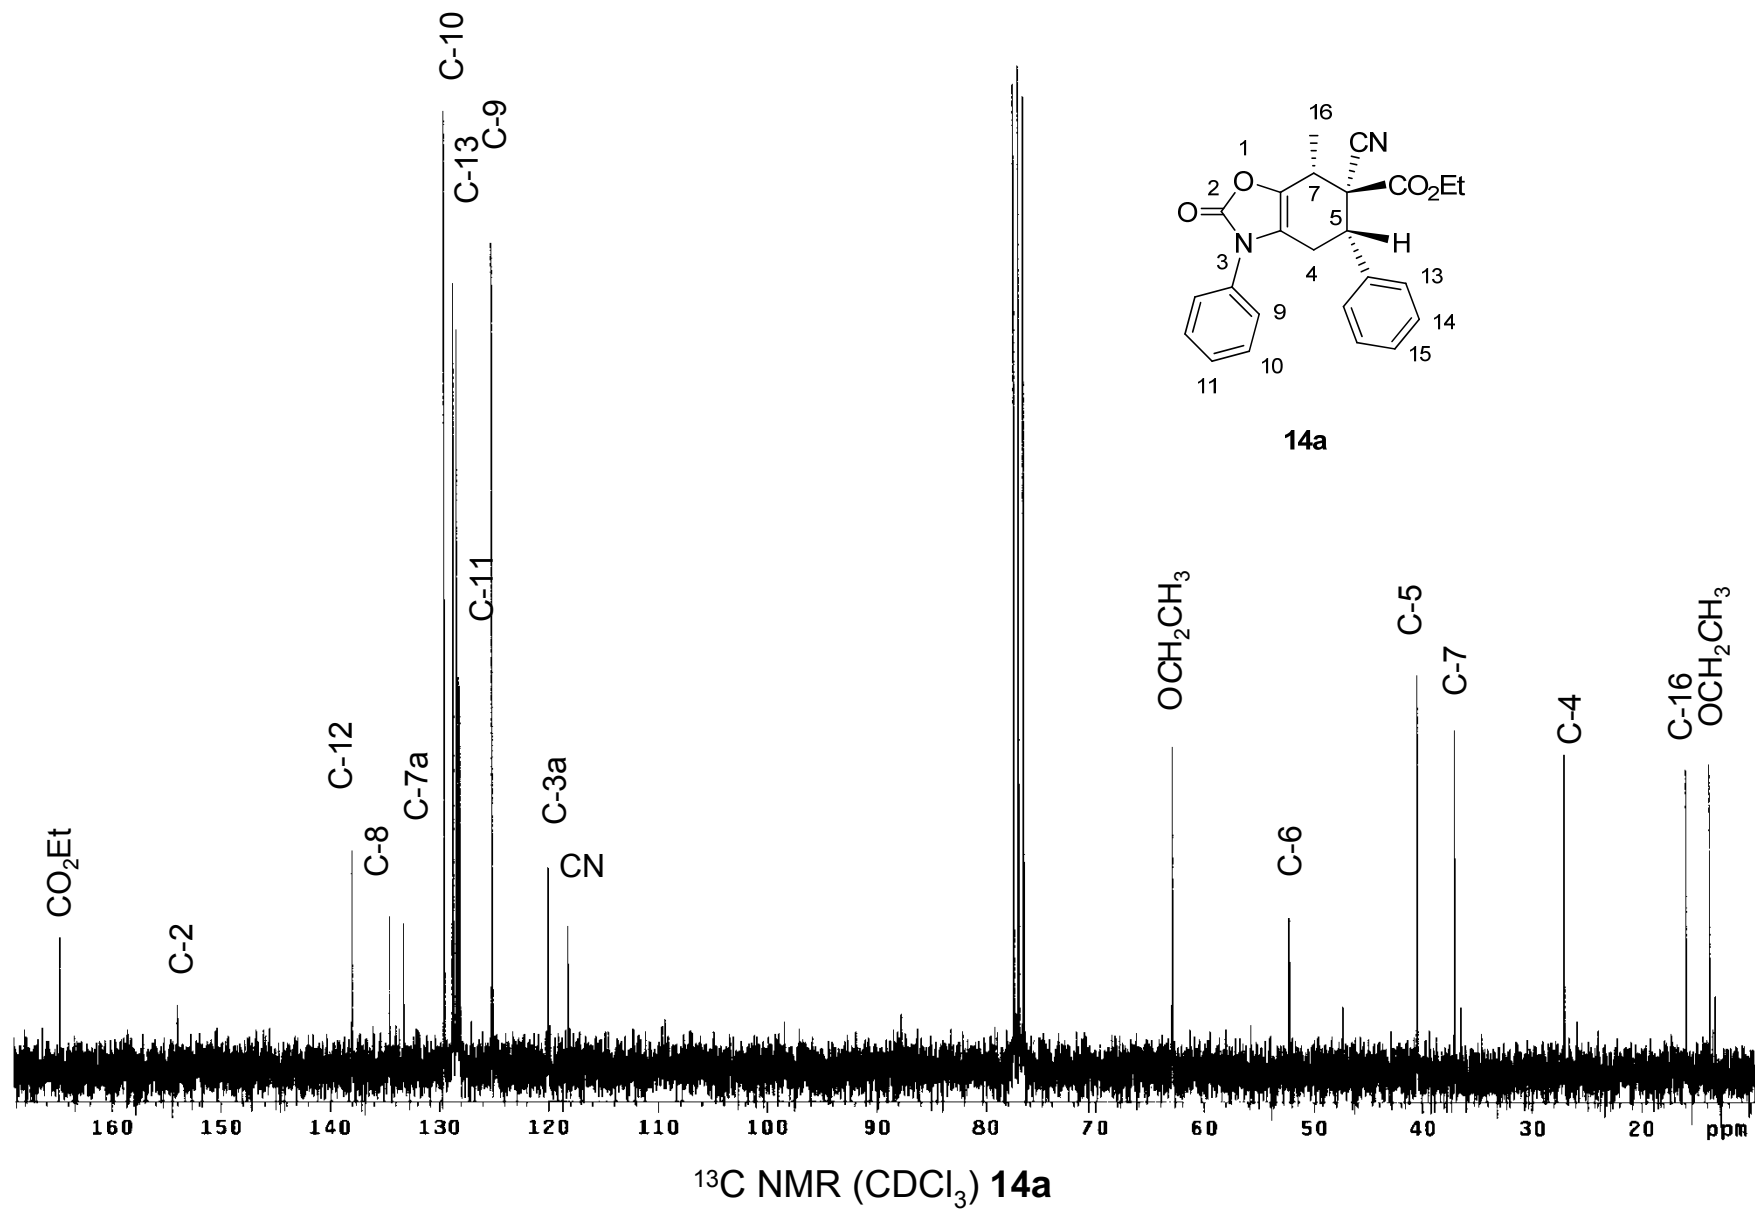

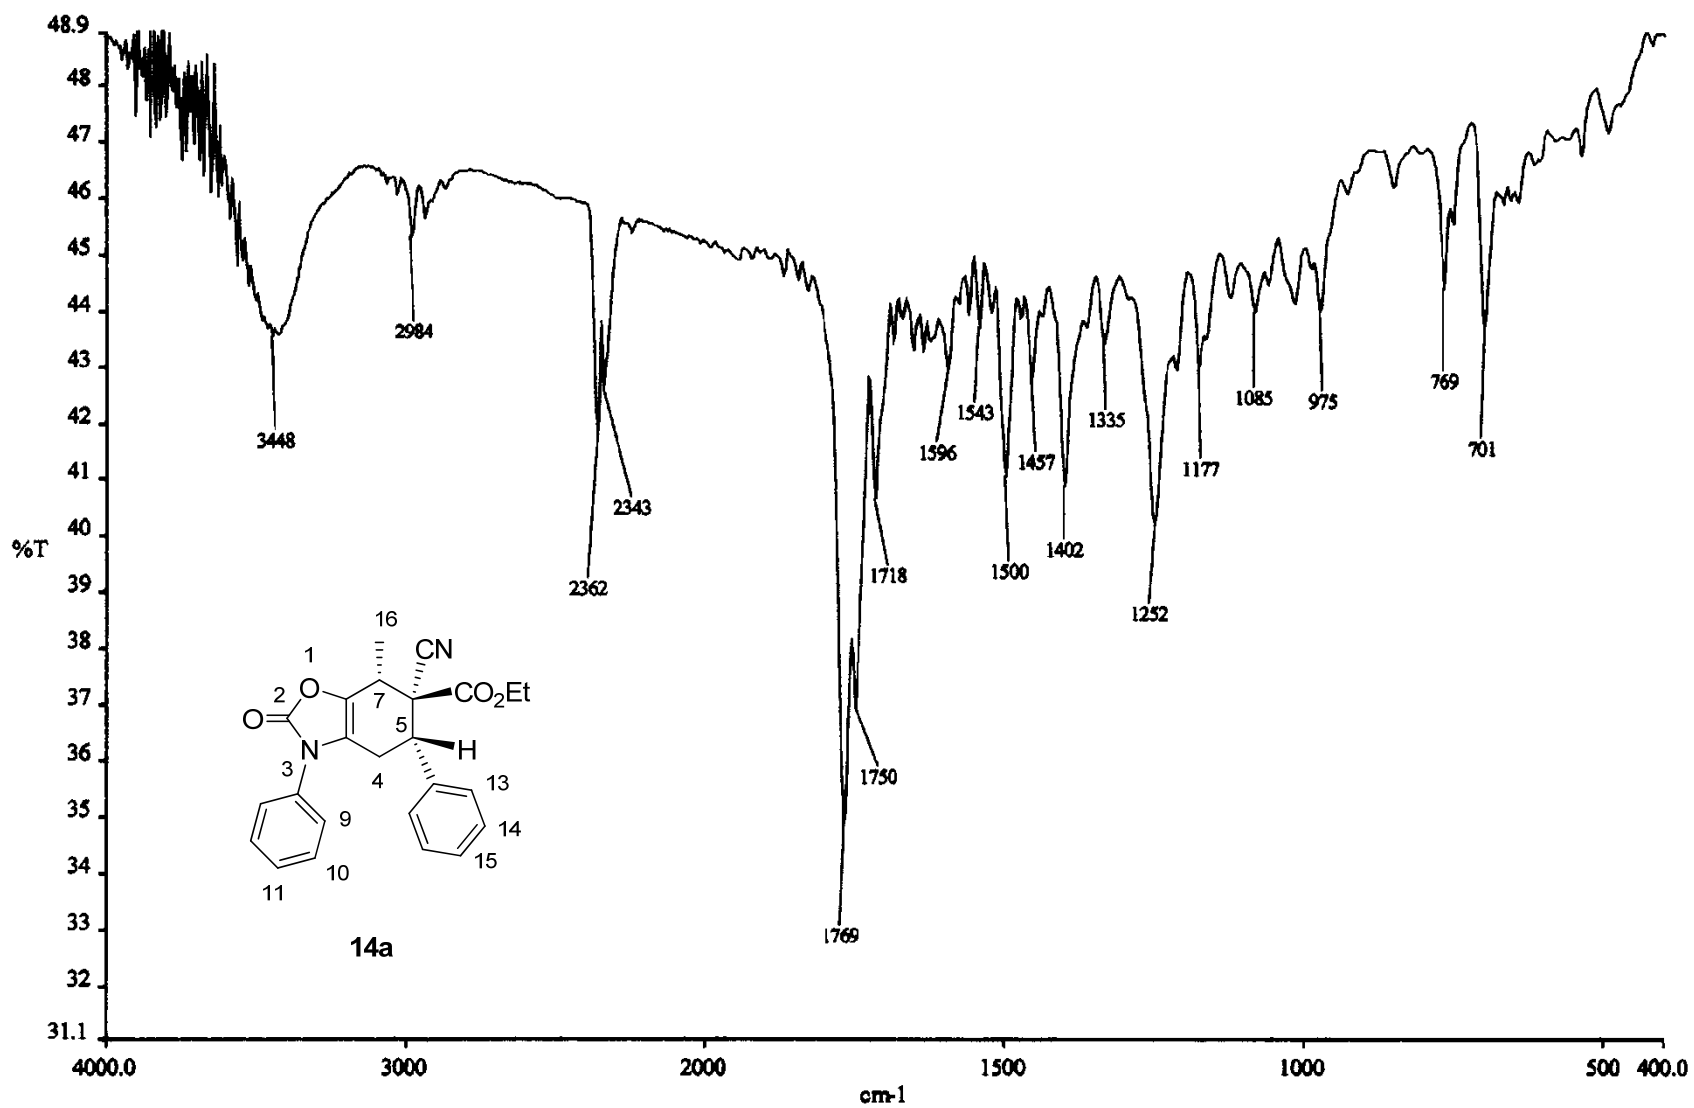

FT-IR (KBr) 14a

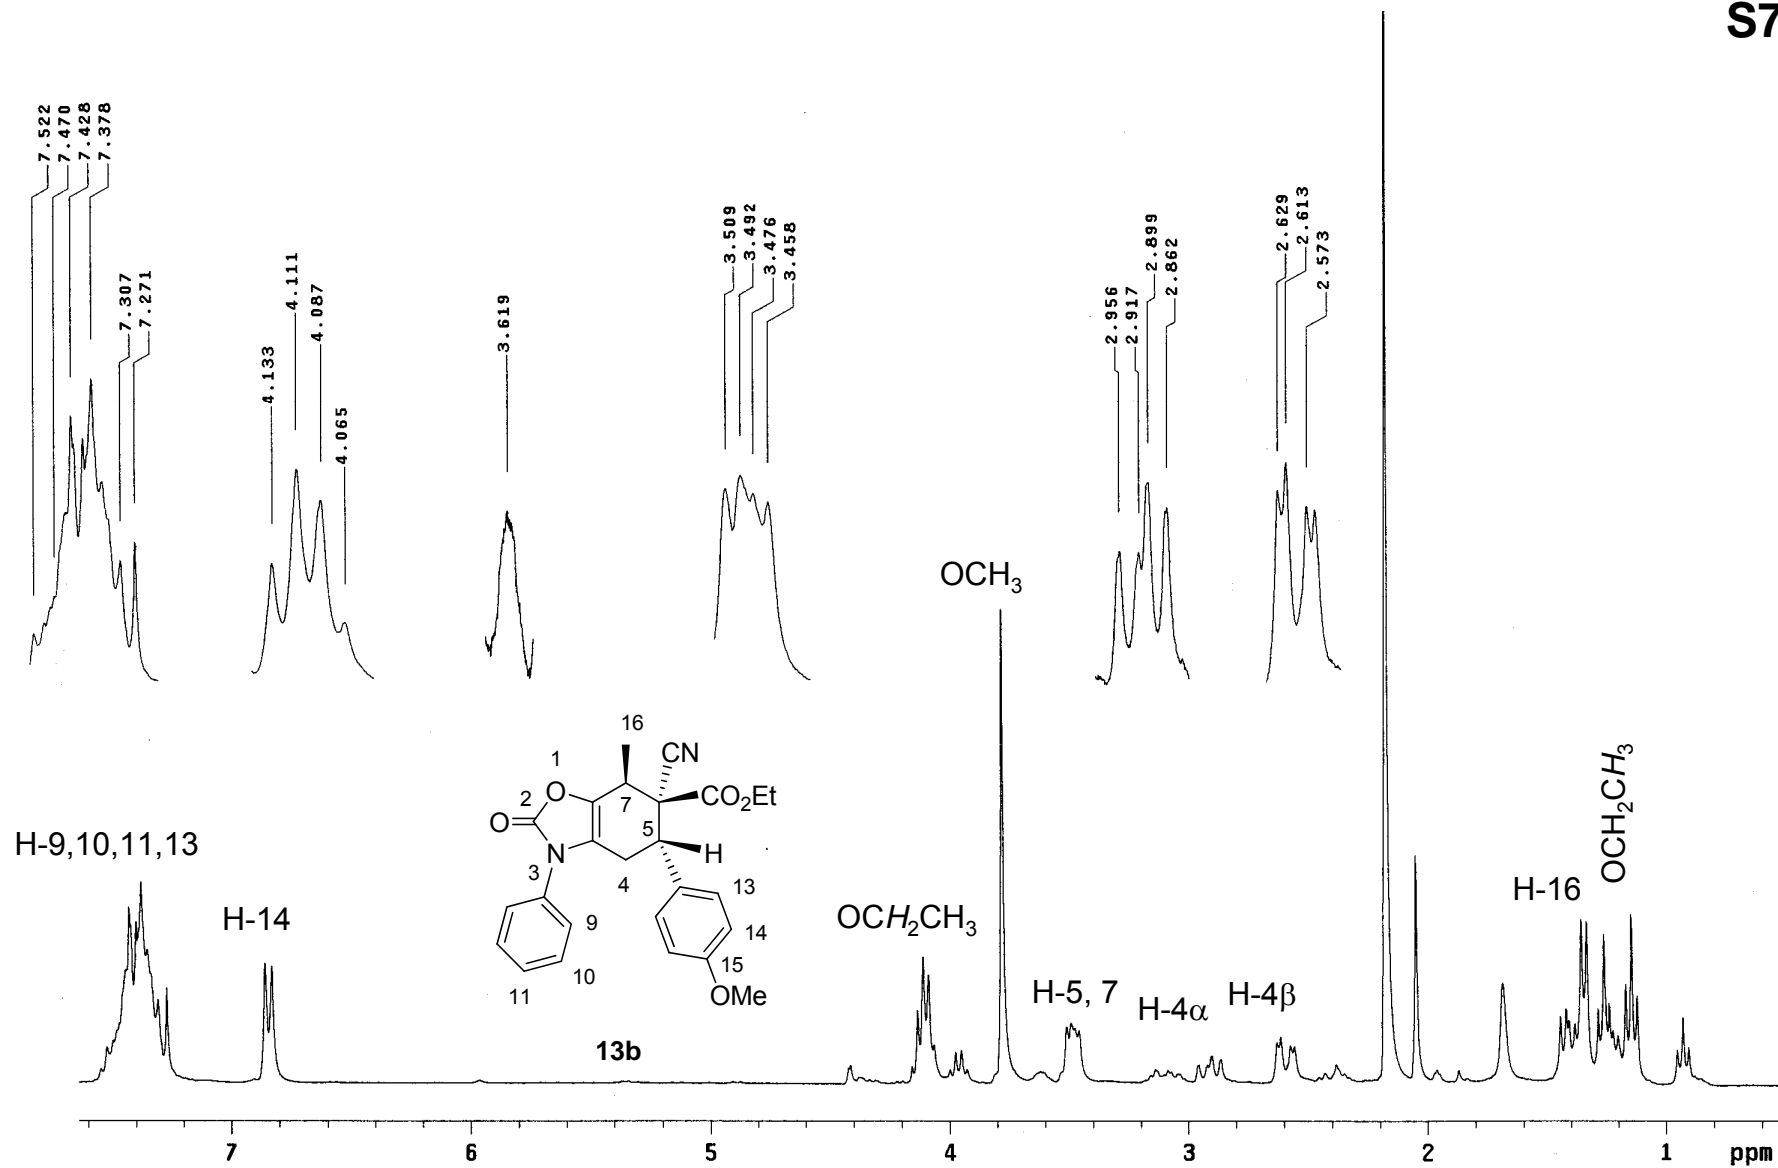

**<sup>1</sup>H NMR (CDCl<sub>3</sub>) 13b**



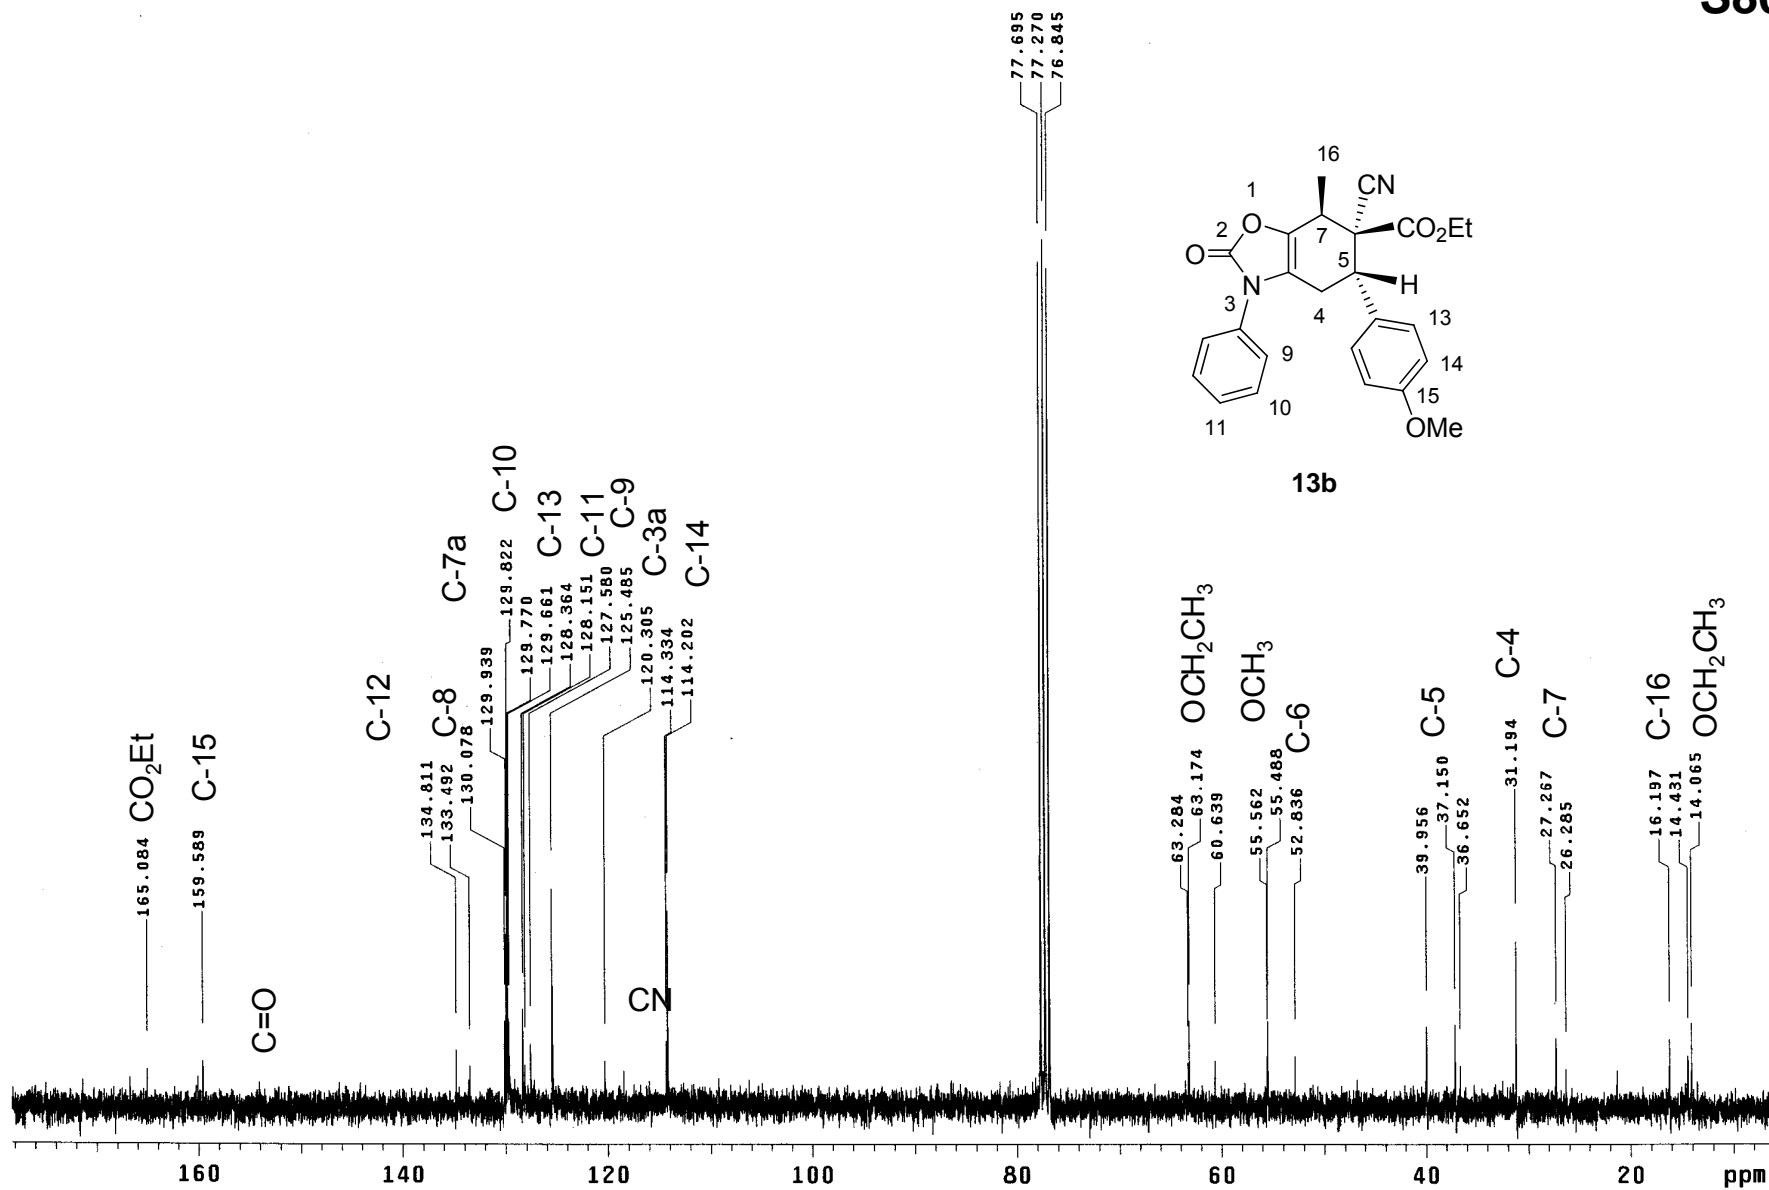

**<sup>13</sup>C NMR (CDCl<sub>3</sub>) 13b**

File: Ines MI55 IDIE 432 Date Run: 05-29-2008 (Time Run: 23:34:28)  
 Sample: Ines MI55 IDIE 432  
 Instrument: JEOL GCmate  
 Inlet: Direct Probe Ionization mode: EI+

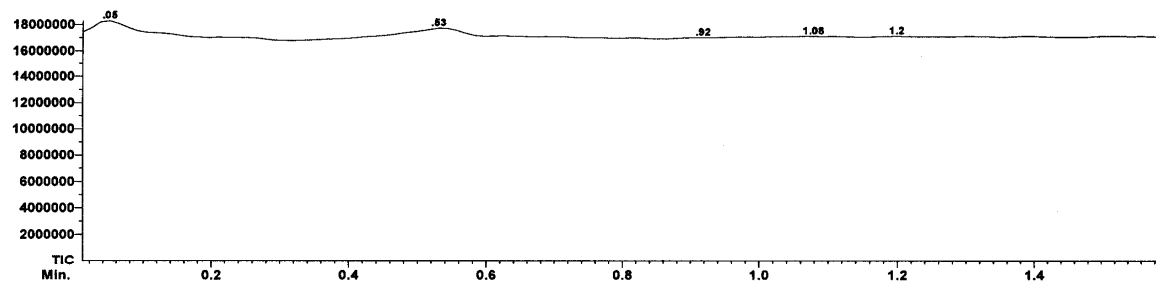

Scan: 33-43

R.T.: .51

Base: m/z 281; 1.5%FS TIC: 862901

#Ions: 1760

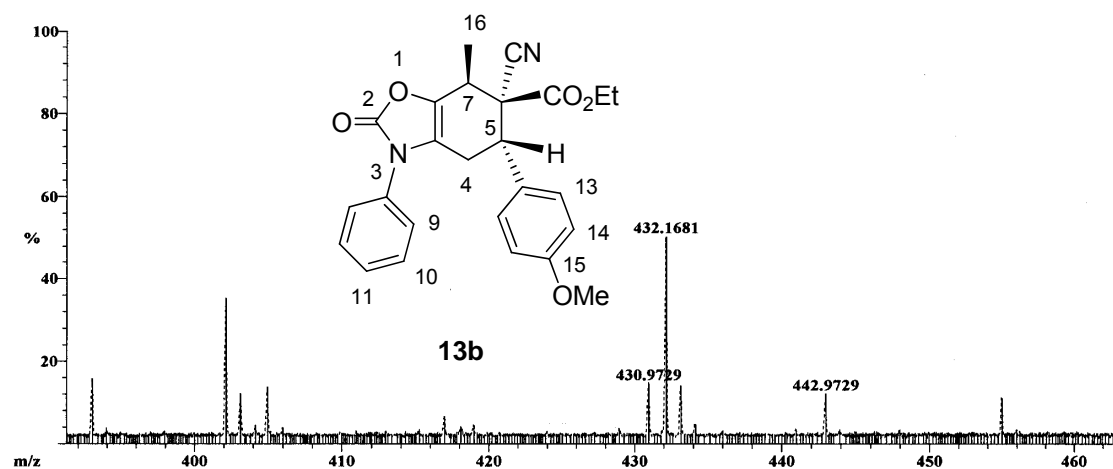Selected Isotopes :  $H_{0-24}C_{0-25}N_{0-2}O_{0-5}$ 

Error Limit : 20 mmu

| <u>Measured Mass</u> | <u>% Base</u> | <u>Formula</u>       | <u>Calculated Mass</u> | <u>Error</u> |
|----------------------|---------------|----------------------|------------------------|--------------|
| 432.1681             | 50.4%         | $C_{25}H_{24}N_2O_5$ | 432.1685               | -0.4         |

HRMS 13b

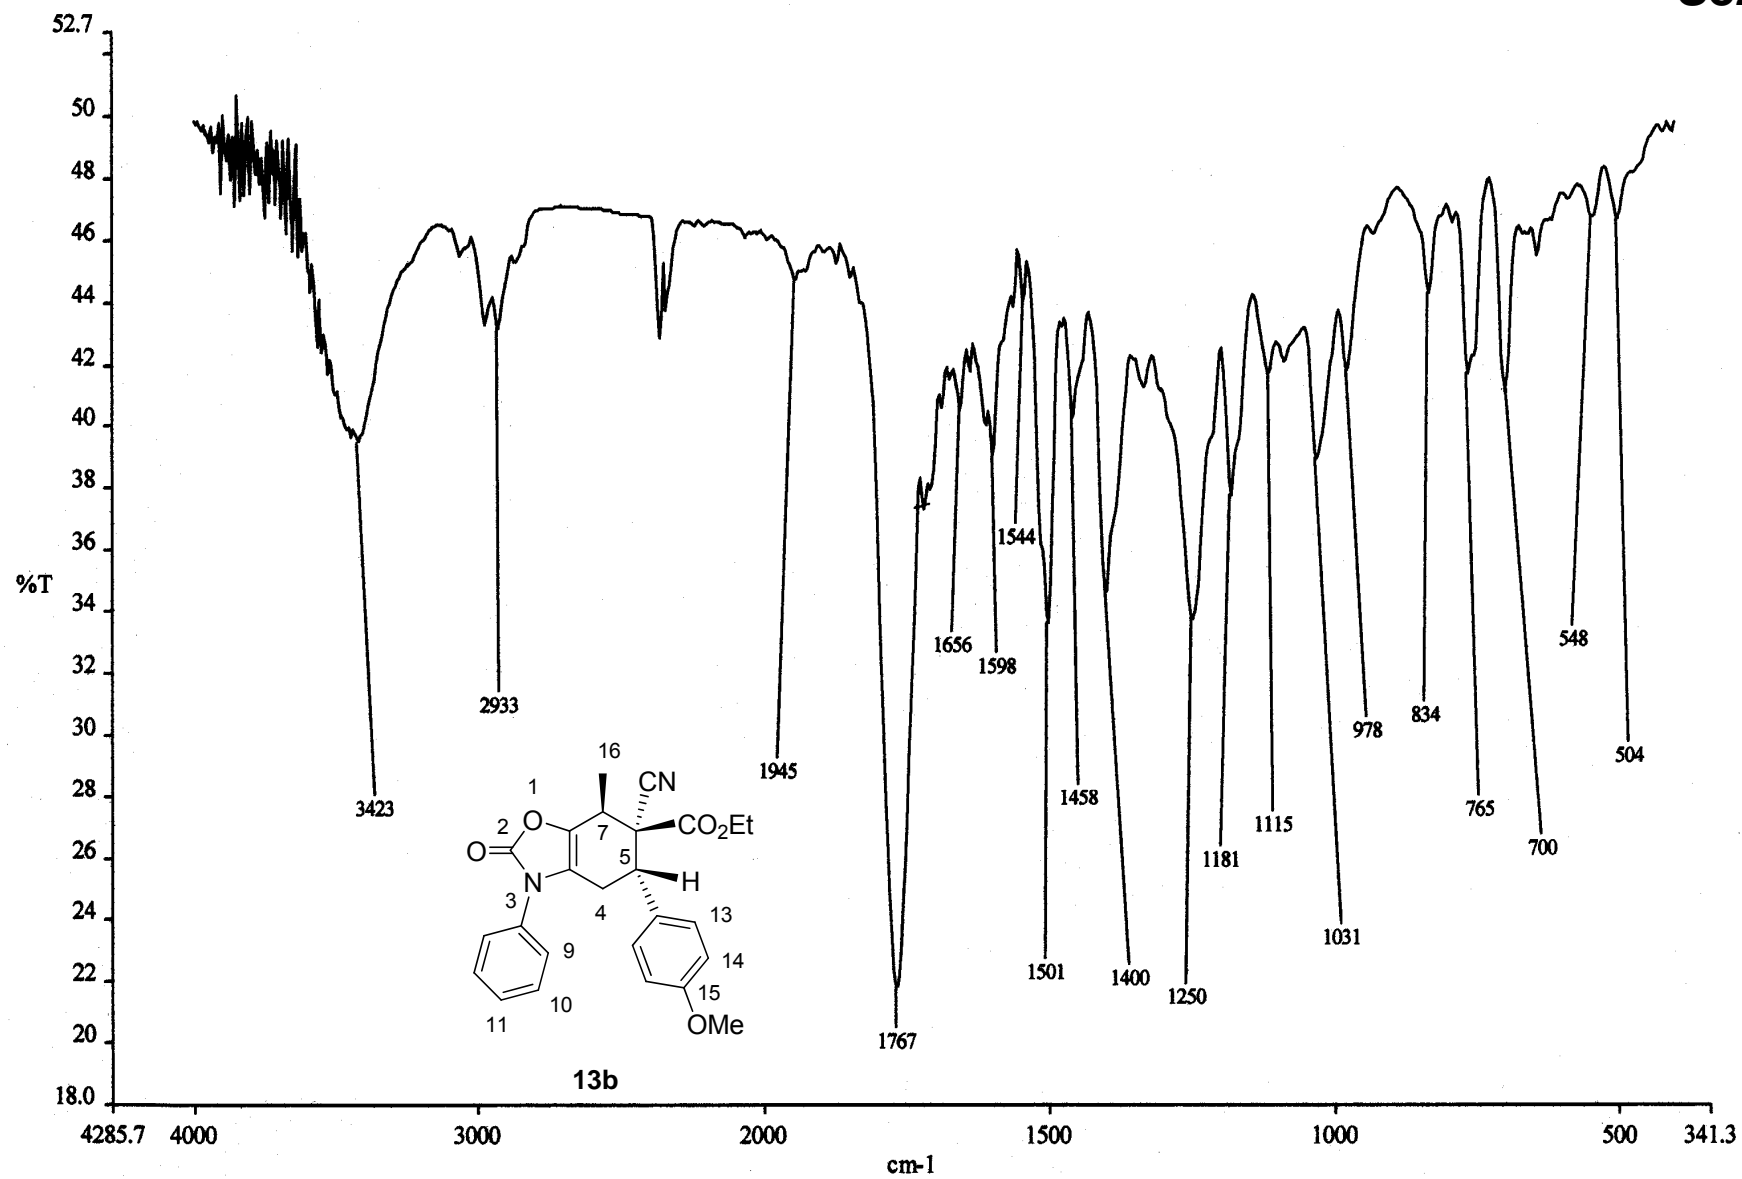

FT-IR (KBr) 13b

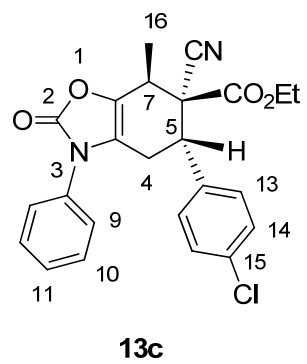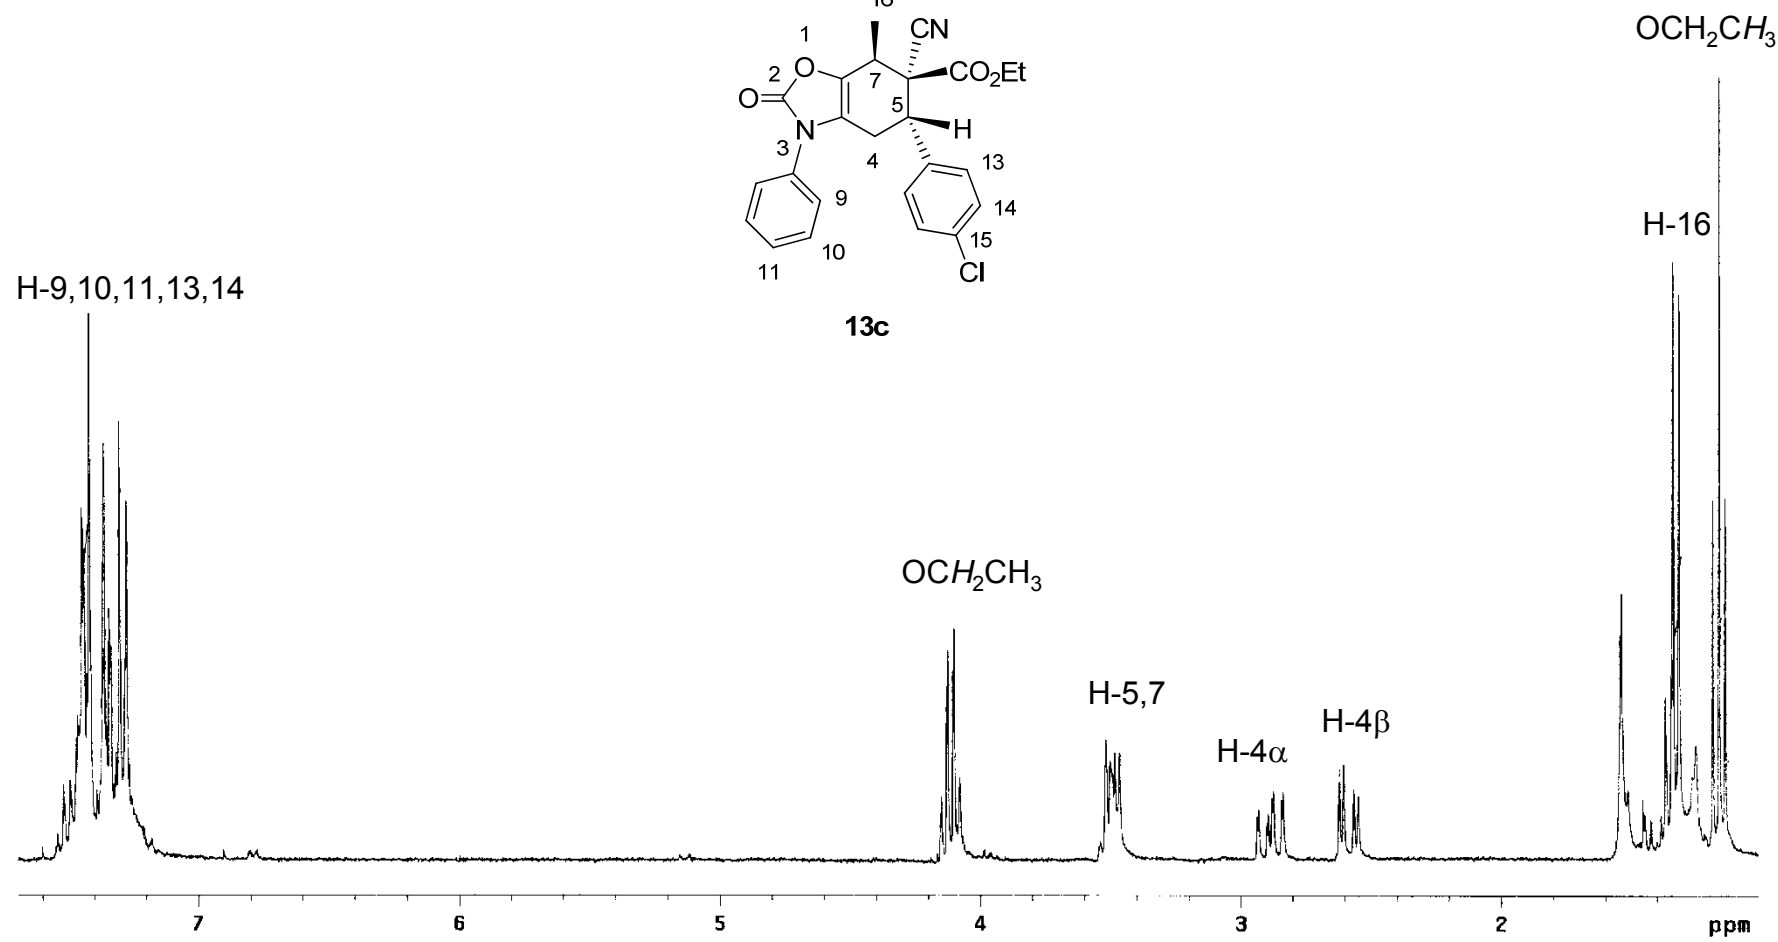

<sup>1</sup>H NMR (CDCl<sub>3</sub>) **13d**

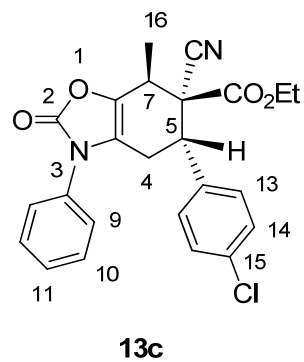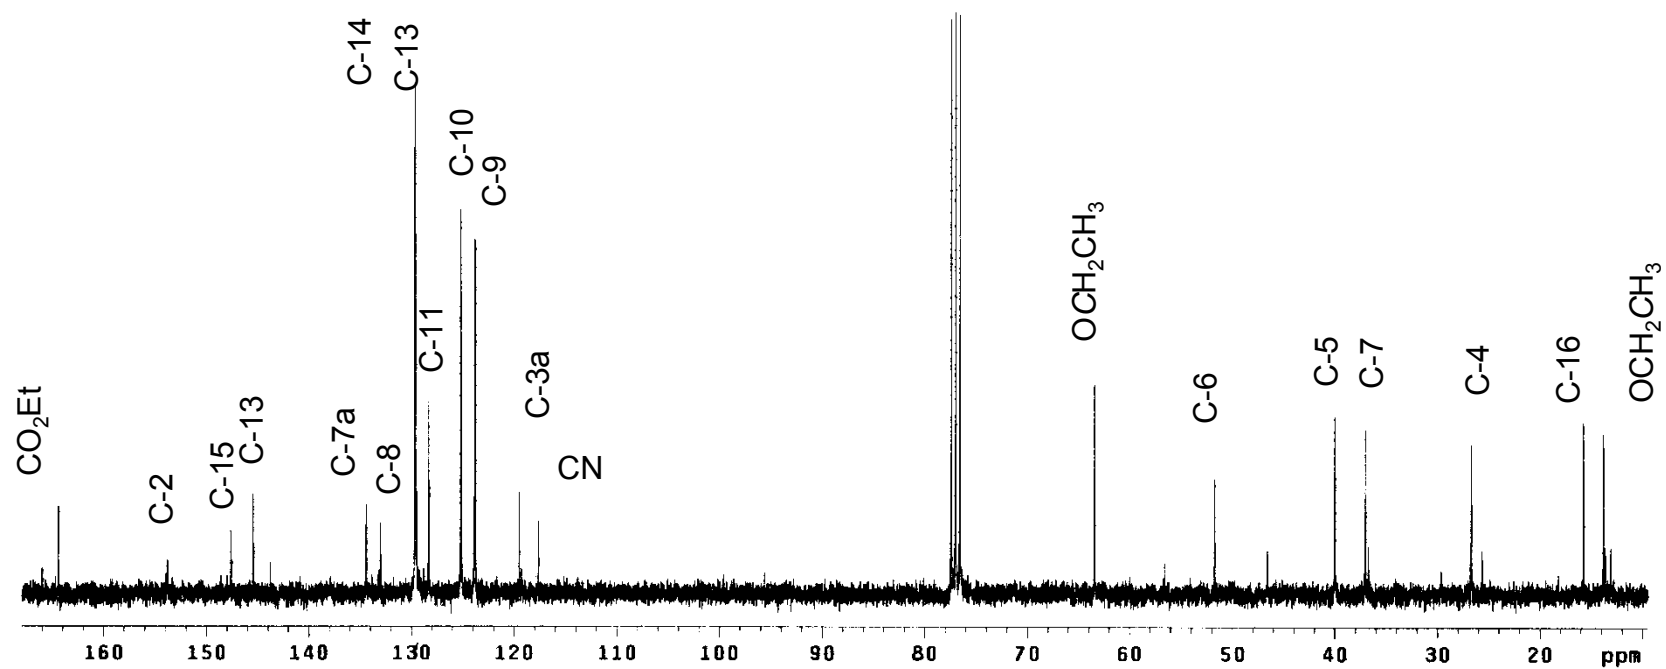

S85

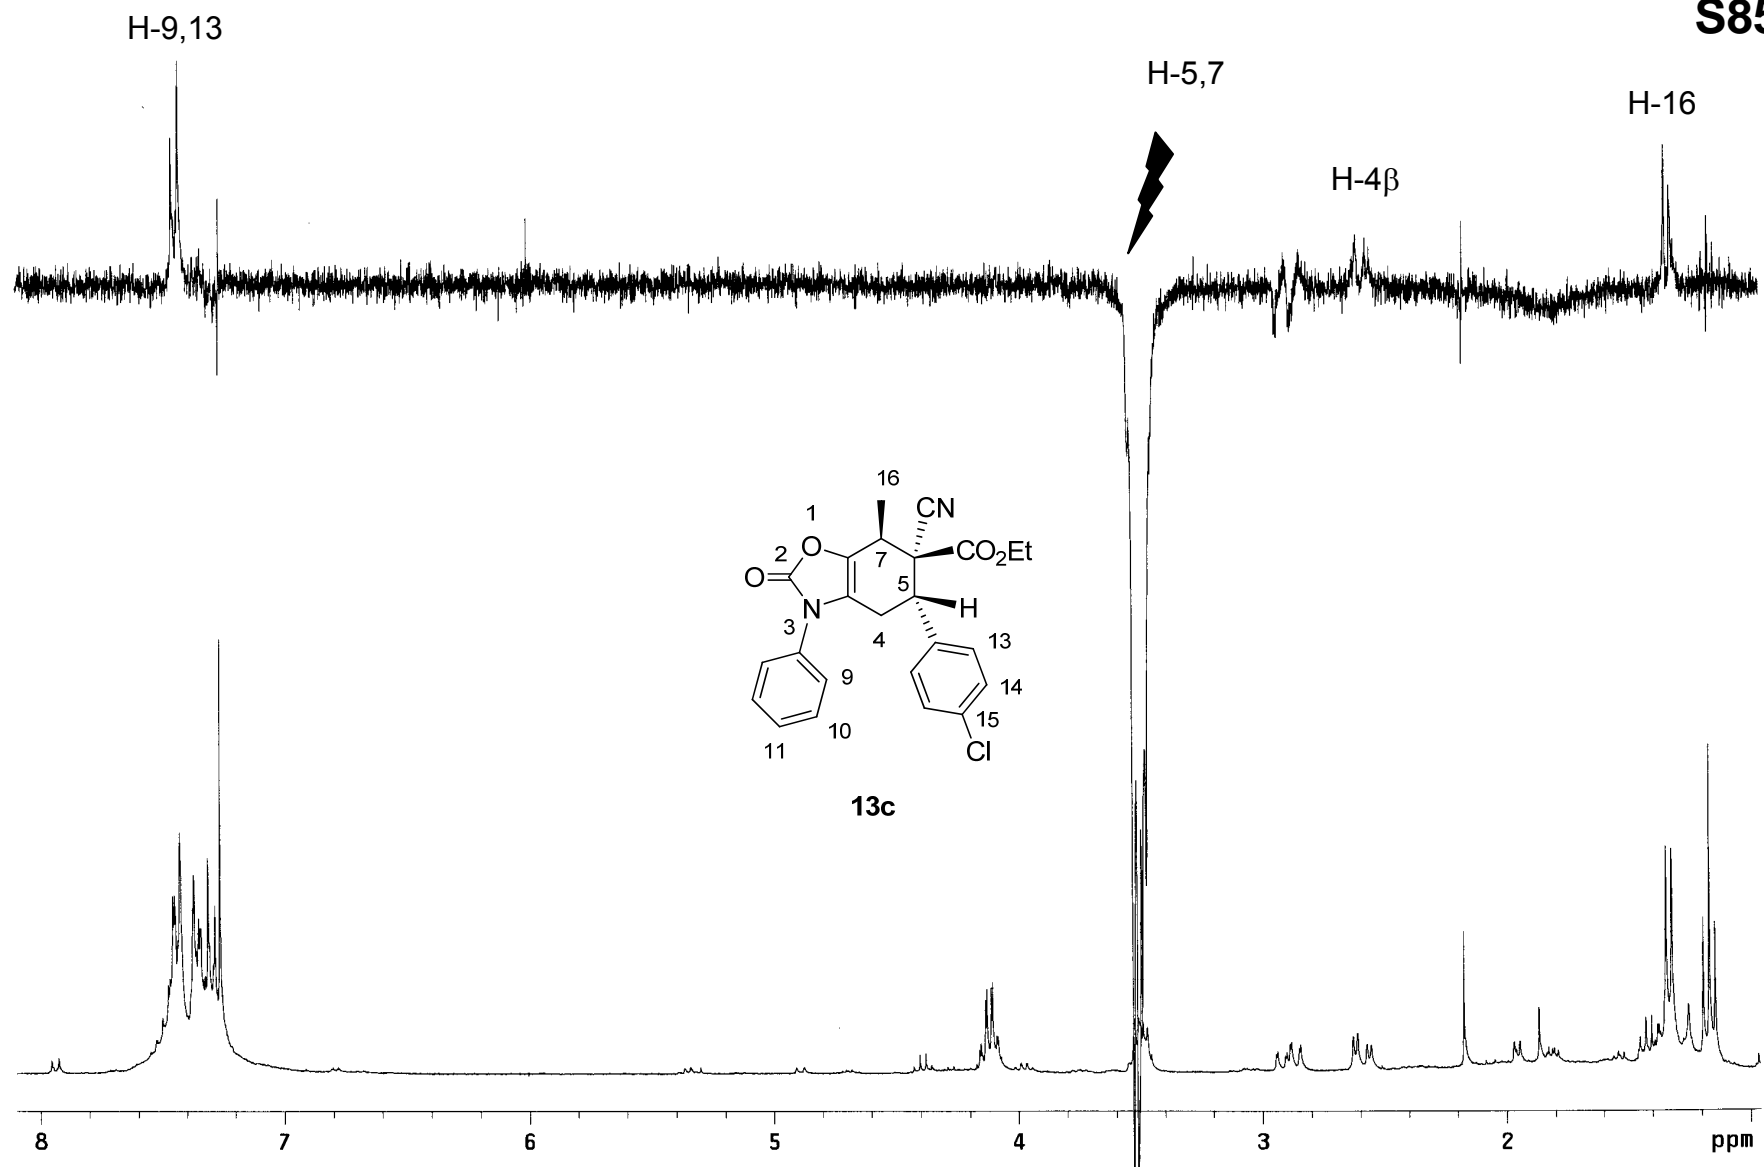

NOE experiment (CDCl<sub>3</sub>) 13c

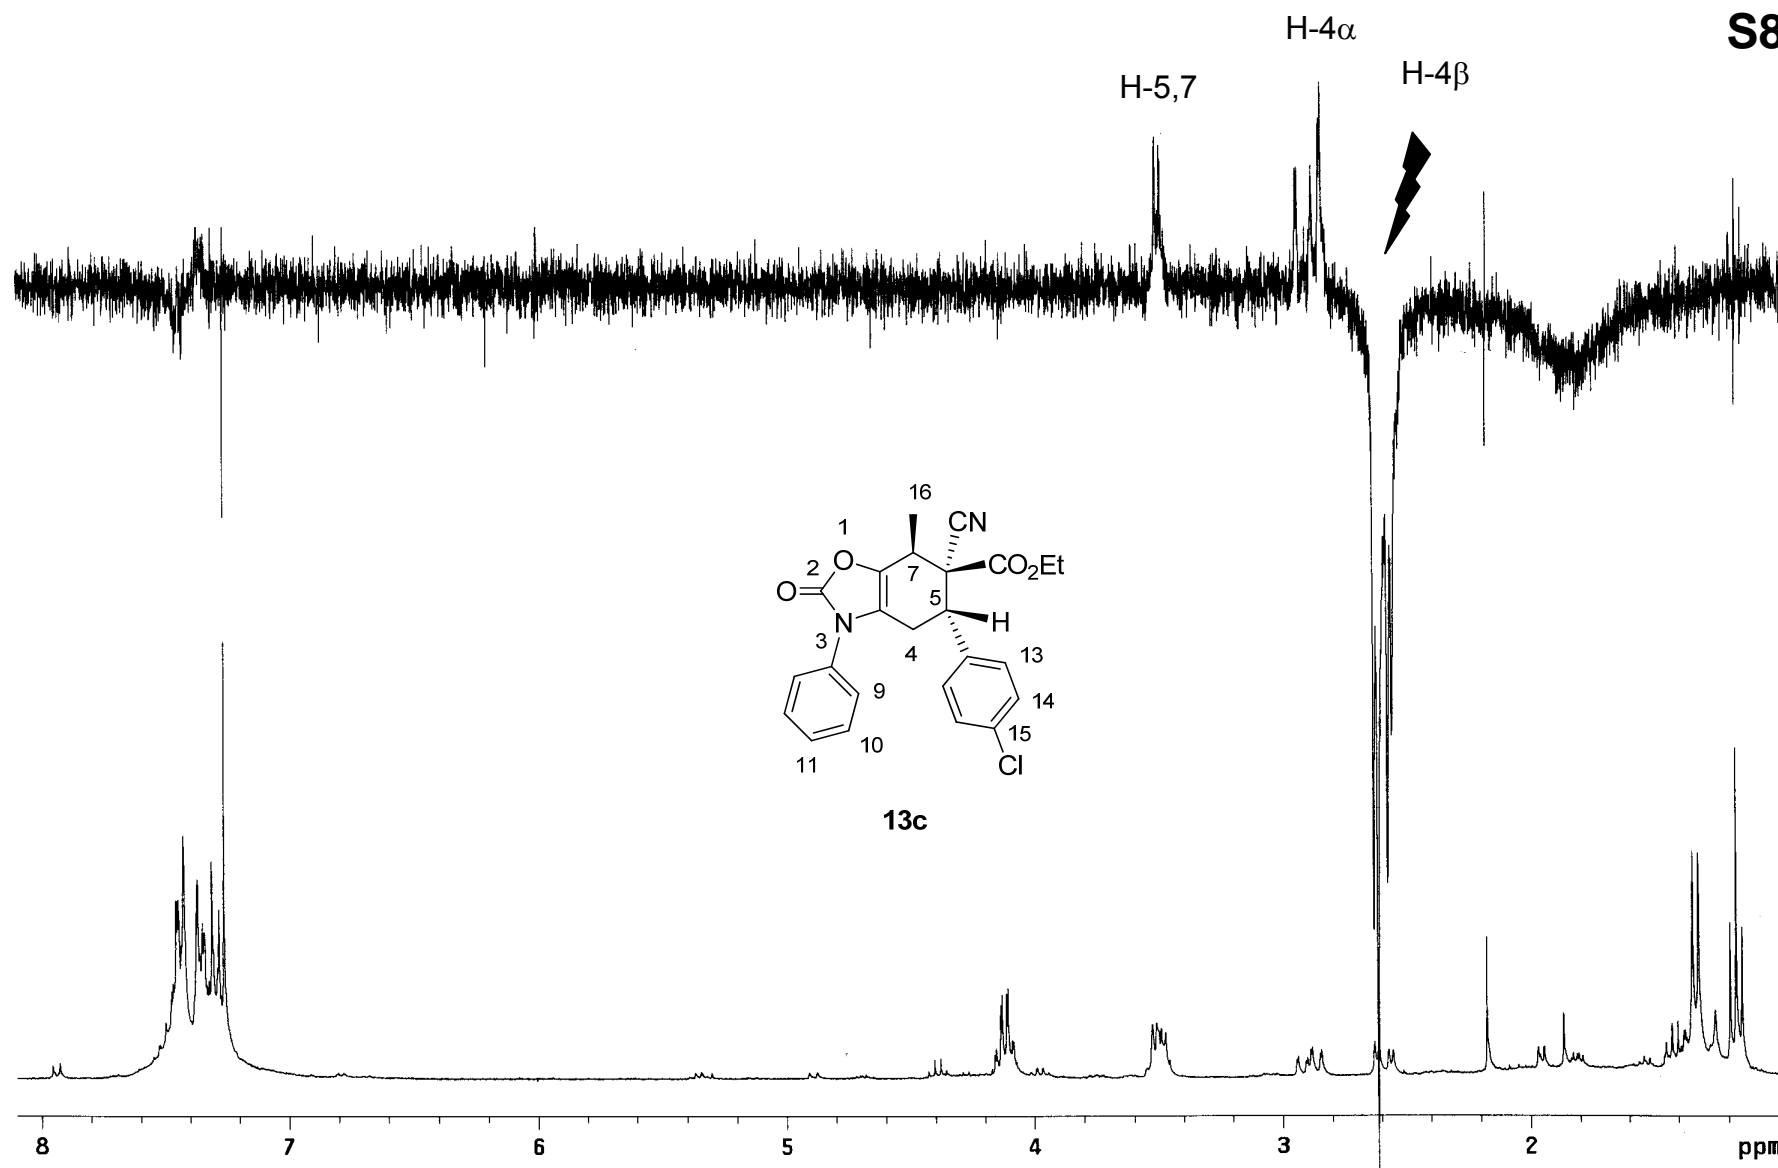NOE experiment (CDCl<sub>3</sub>) **13c**

S87

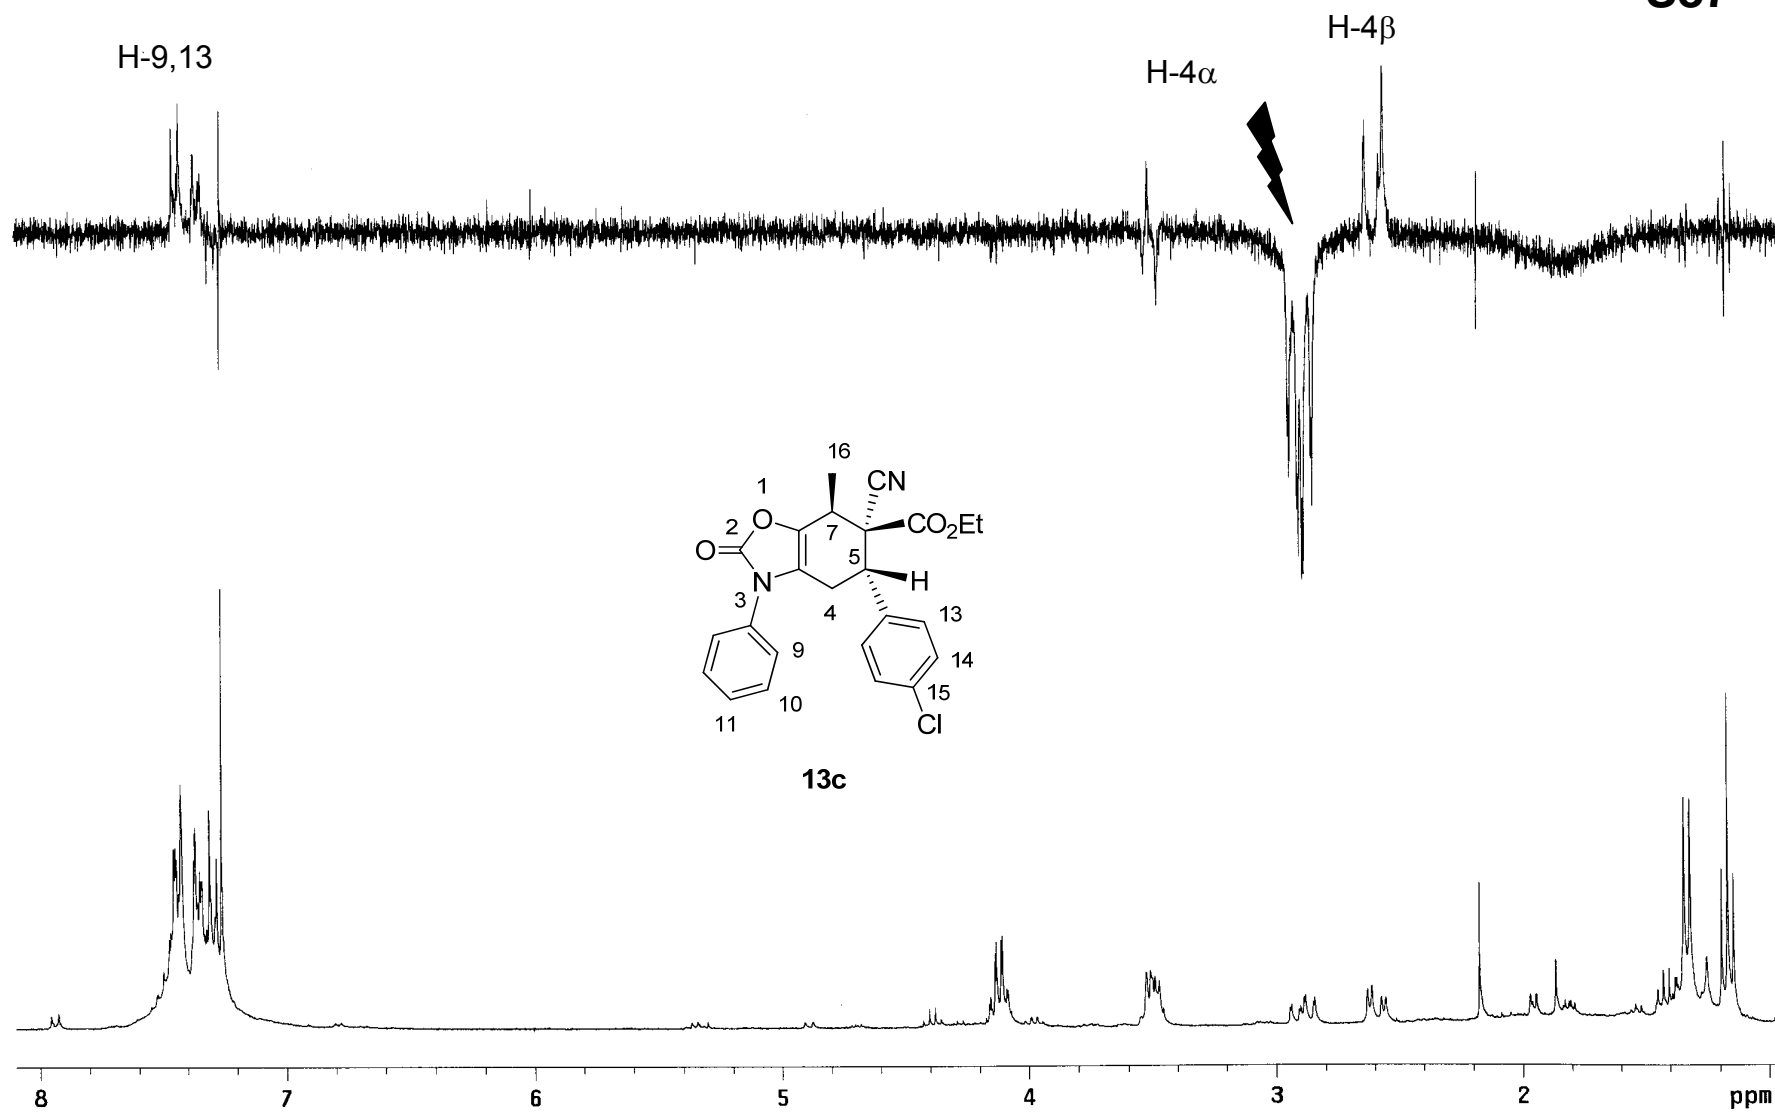

NOE experiment (CDCl<sub>3</sub>) 13c



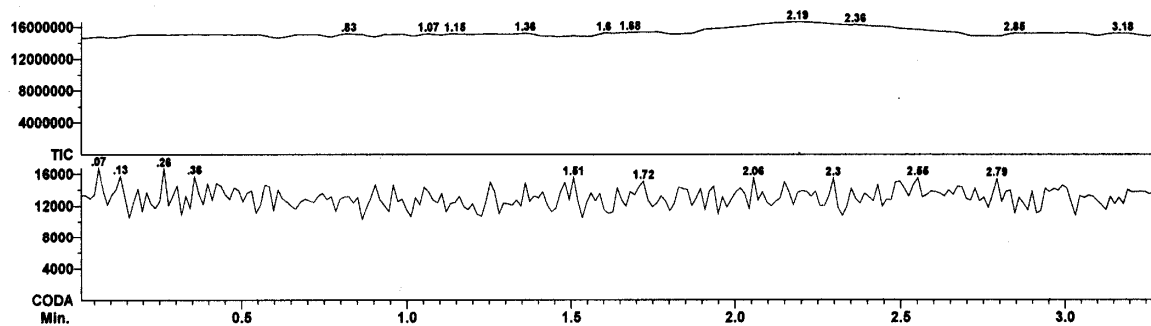

Scan: 145-172

R.T.: 2.12

Base: m/z 436; 1.4%FS TIC: 764291

#Ions: 1755

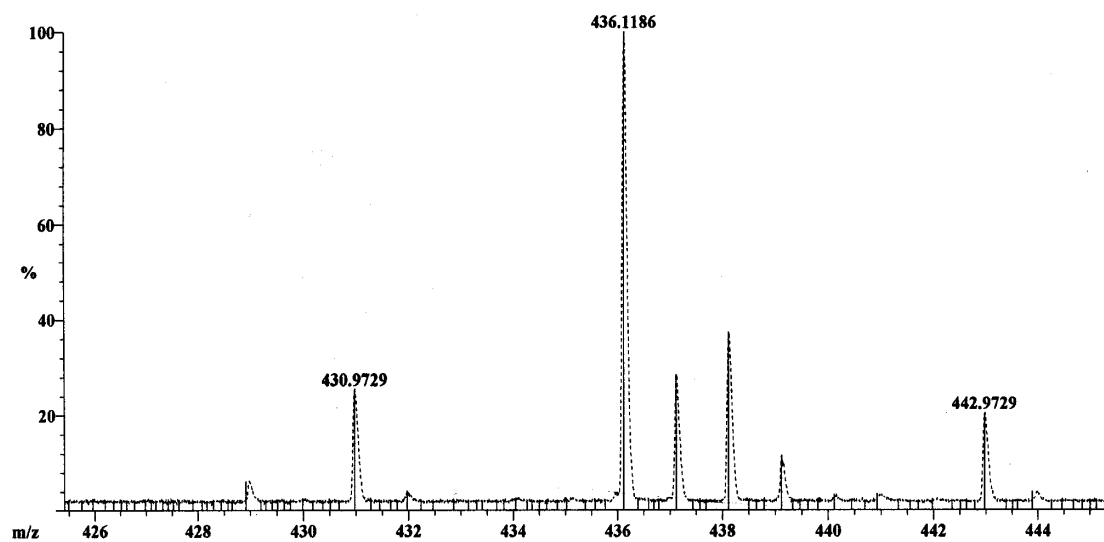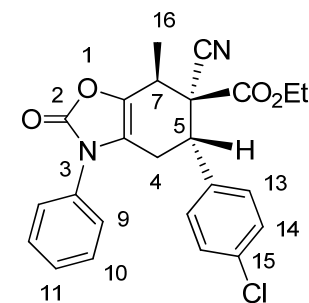

13c

Selected Isotopes :  $H_{0-21}C_{0-24}N_{0-2}O_{0-4}Cl_{0-1}$ 

Error Limit : 100 mmu

| <u>Measured Mass</u> | <u>% Base</u> | <u>Formula</u>         | <u>Calculated Mass</u> | <u>Error</u> |
|----------------------|---------------|------------------------|------------------------|--------------|
| 436.1186             | 100.0%        | $C_{24}H_{21}N_2O_4Cl$ | 436.1190               | -0.4         |

HRMS 13c

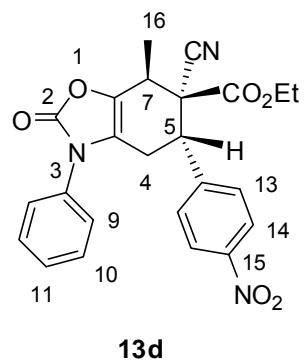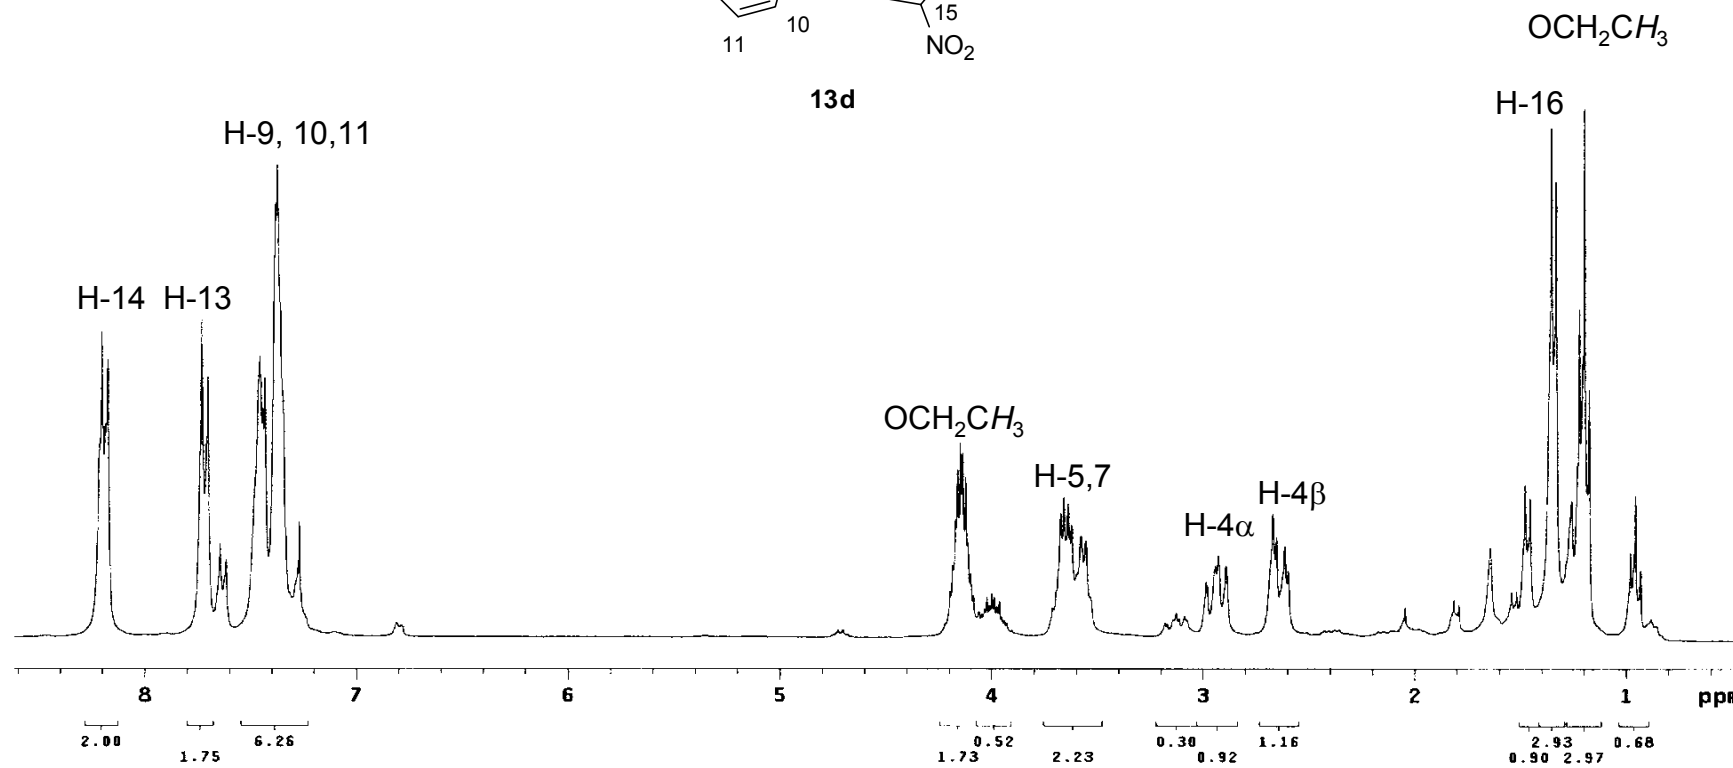

<sup>1</sup>H NMR (CDCl<sub>3</sub>) **13d**

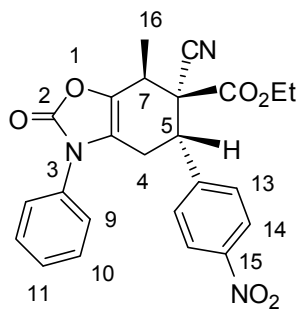

13d

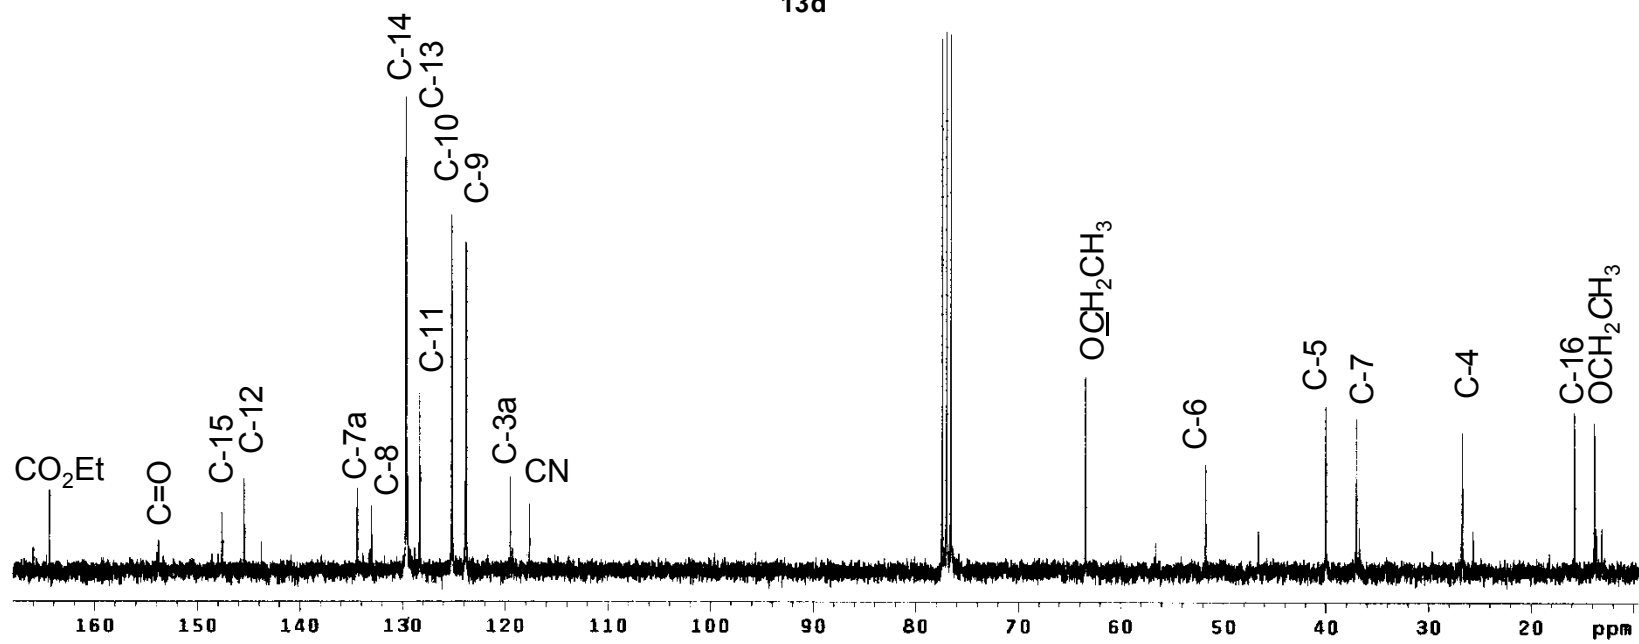 $^{13}\text{C}$  NMR ( $\text{CDCl}_3$ ) 13d

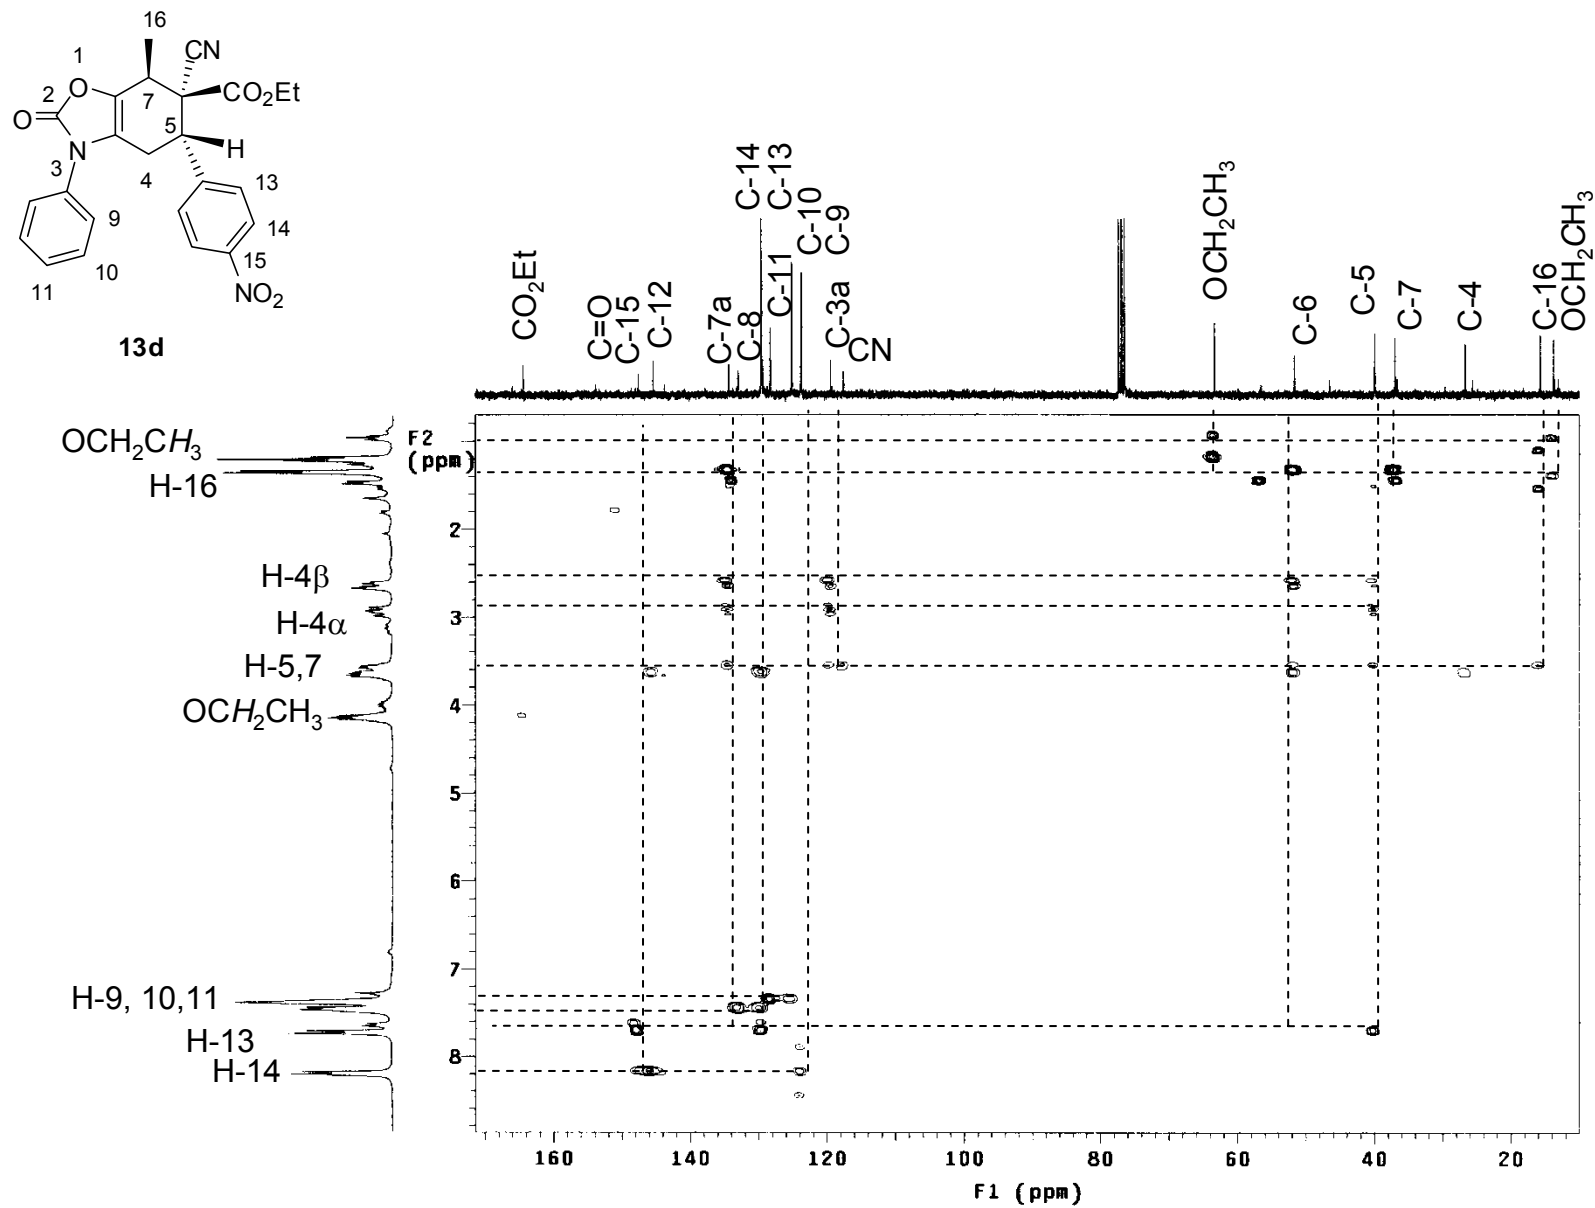

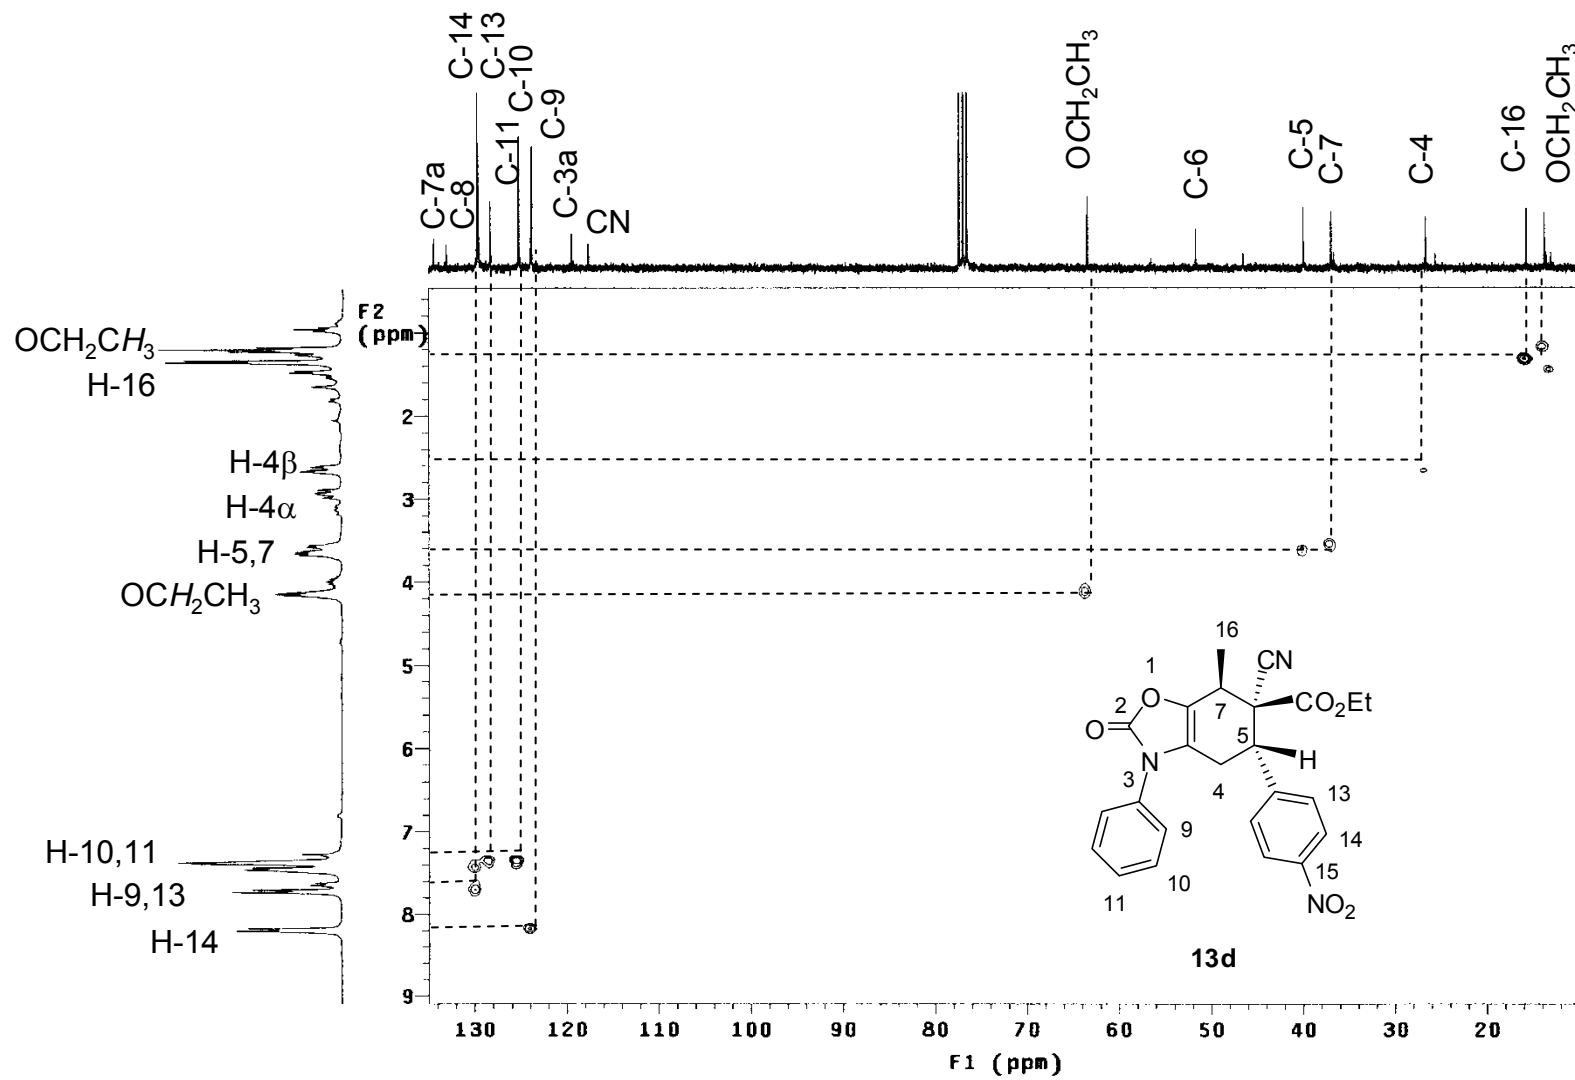

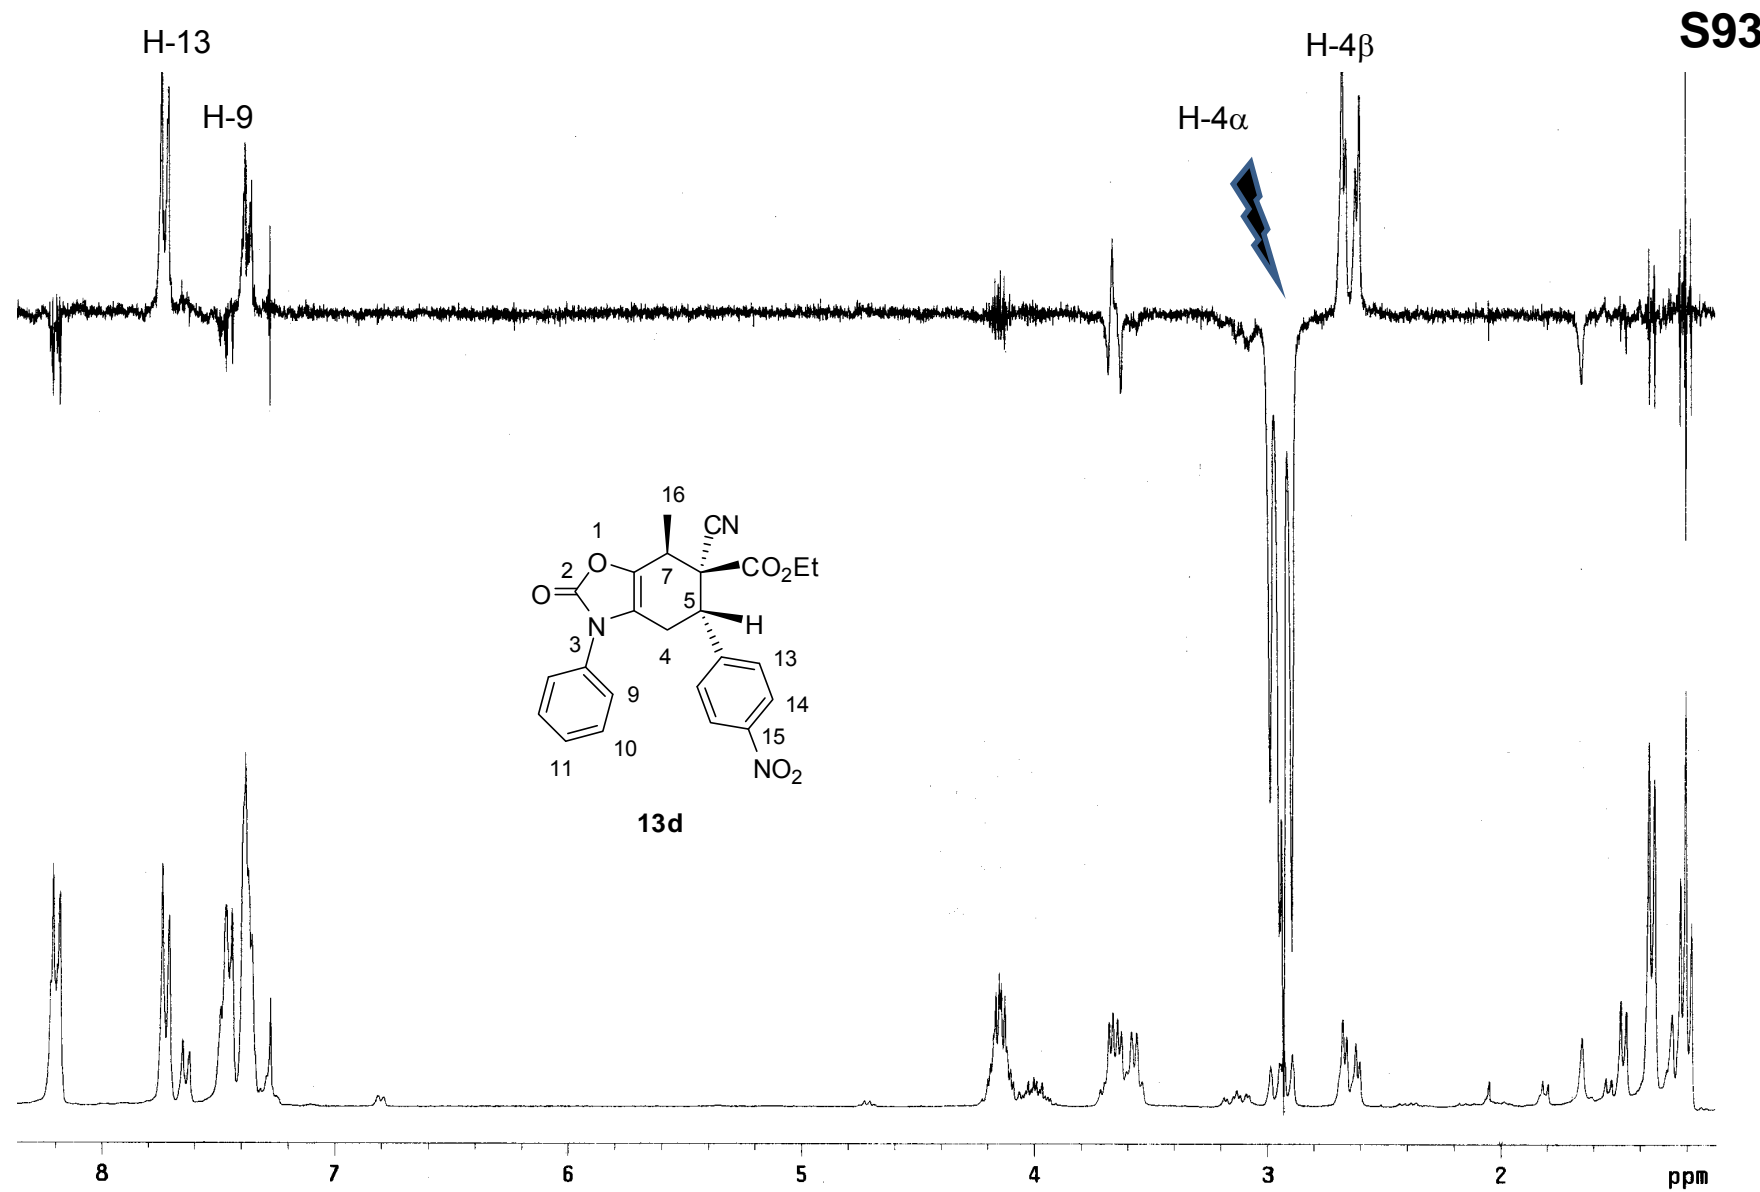

NOE experiment (CDCl<sub>3</sub>) **13d**

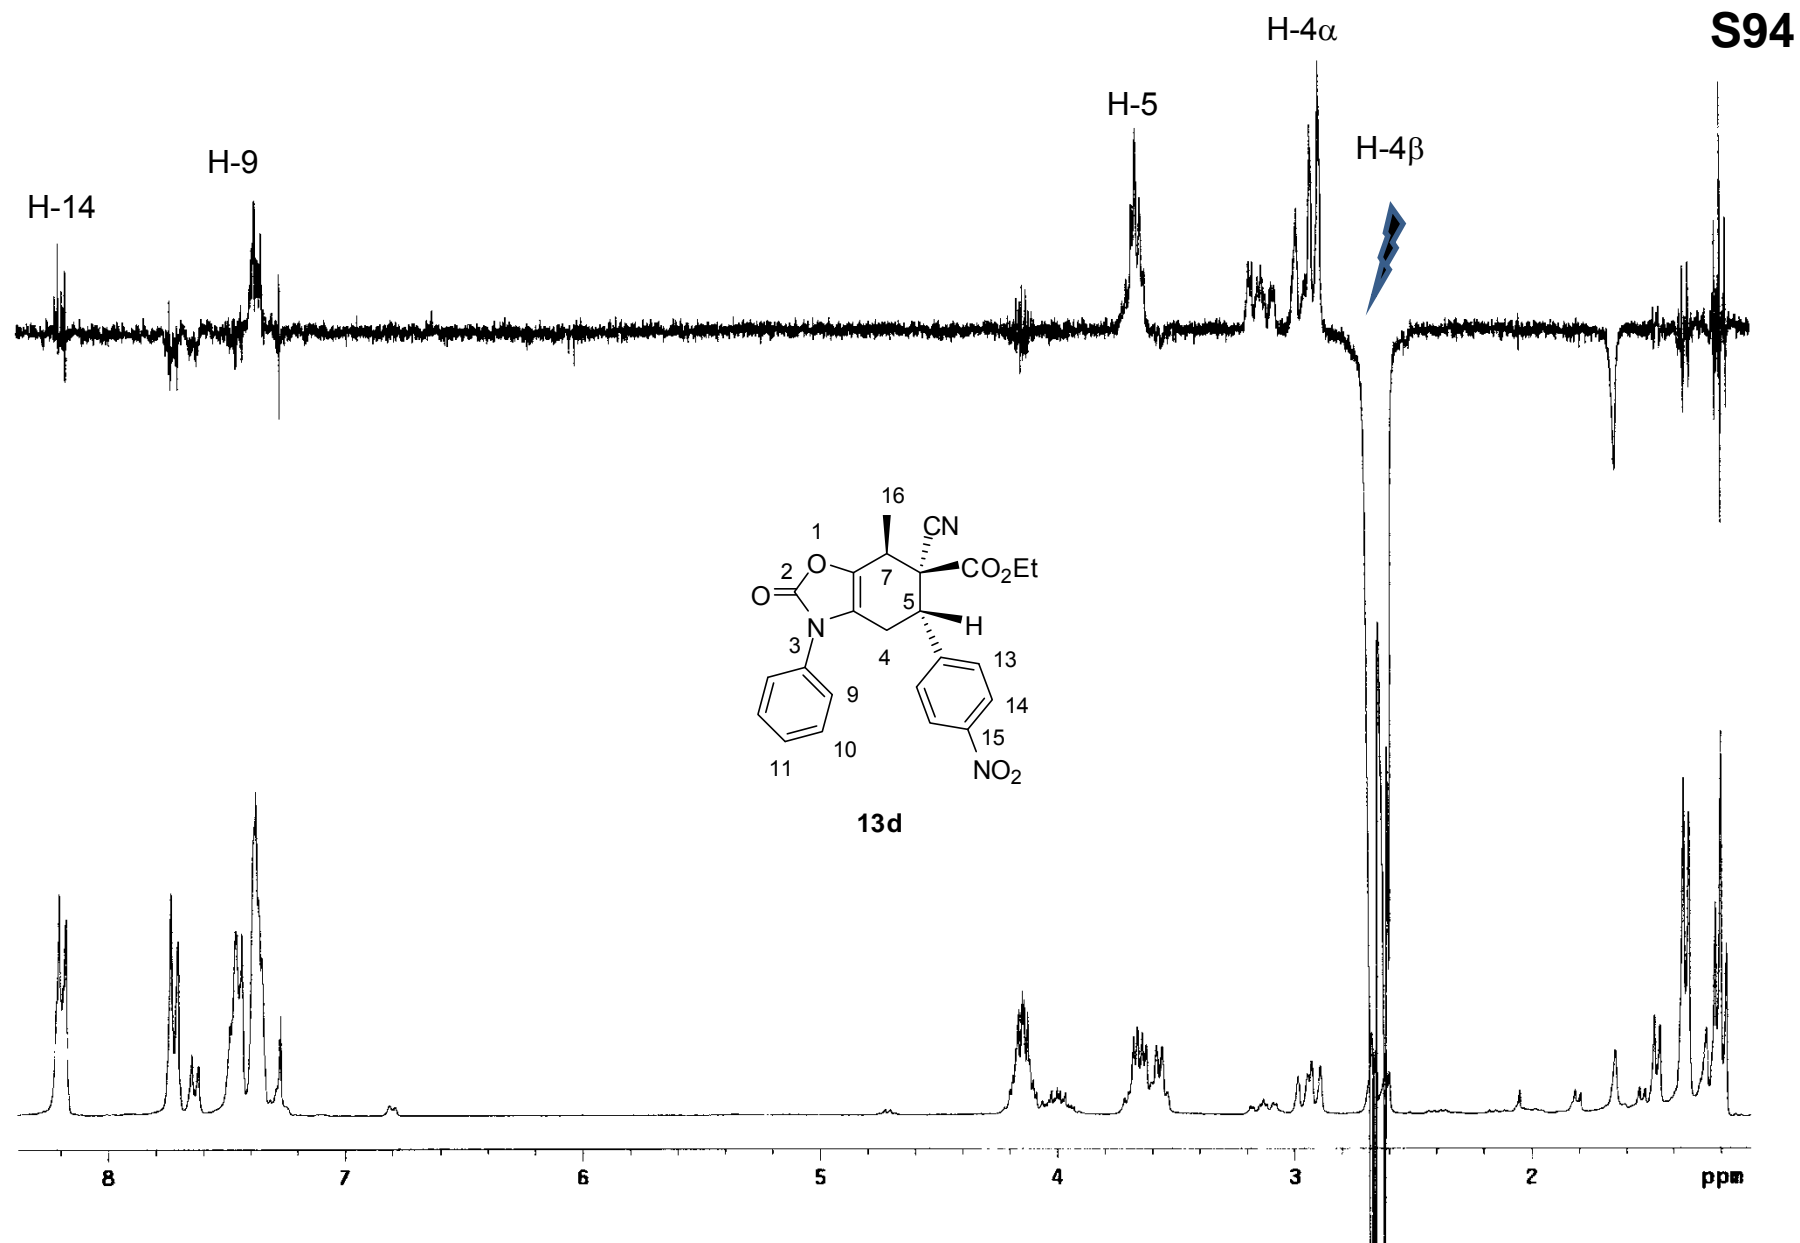

NOE experiment (CDCl<sub>3</sub>) **13d**

File: FDR 447 IEID sdaDate Run: 06-05-2008 (Time Run: 04:56:27)

Sample: MI 6

Instrument: JEOL GCmate

Inlet: Direct Probe

Ionization mode: EI+

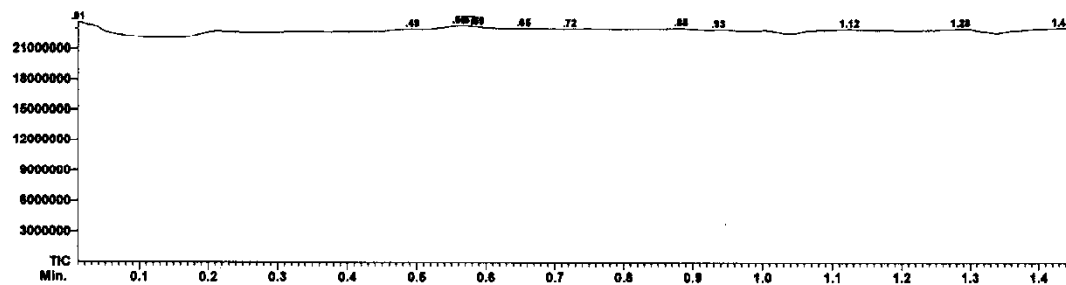

Scan: 36-39

R.T.: .5

Base: m/z 281; 14.5%FS TIC: 1569580

#Ions: 1805

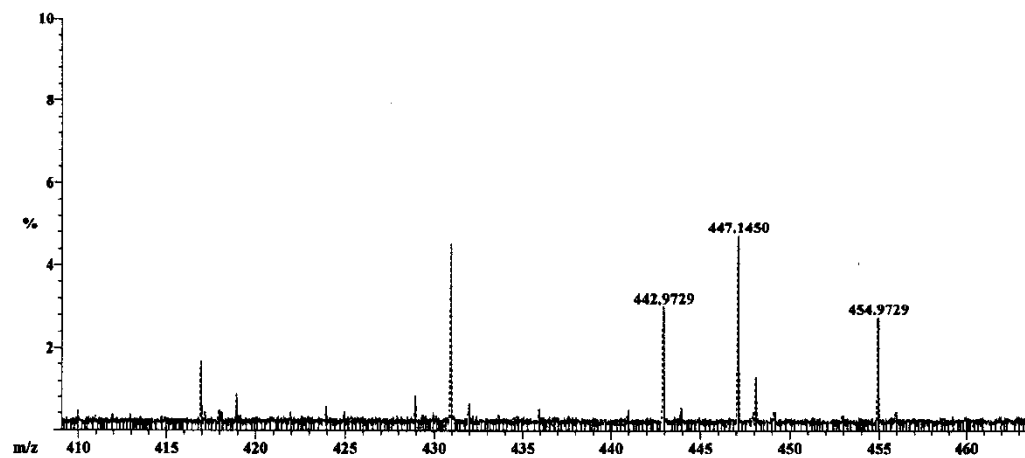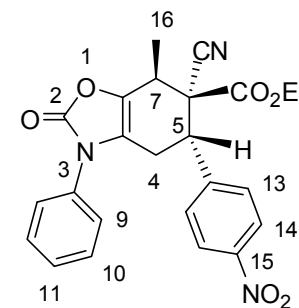

13d

Selected Isotopes :  $H_{0-21}C_{0-24}N_{0-3}O_{0-6}$ 

Error Limit : 20 mmu

| <u>Measured Mass</u> | <u>% Base</u> | <u>Formula</u>       | <u>Calculated Mass</u> | <u>Error</u> |
|----------------------|---------------|----------------------|------------------------|--------------|
| 447.1450             | 4.7%          | $C_{24}H_{21}N_3O_6$ | 447.1430               | 2.0          |

HRMS 13d





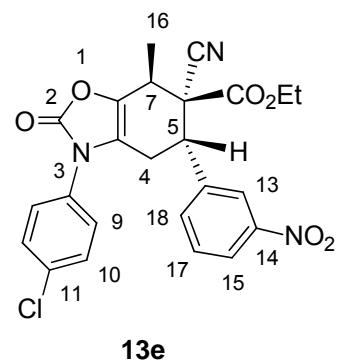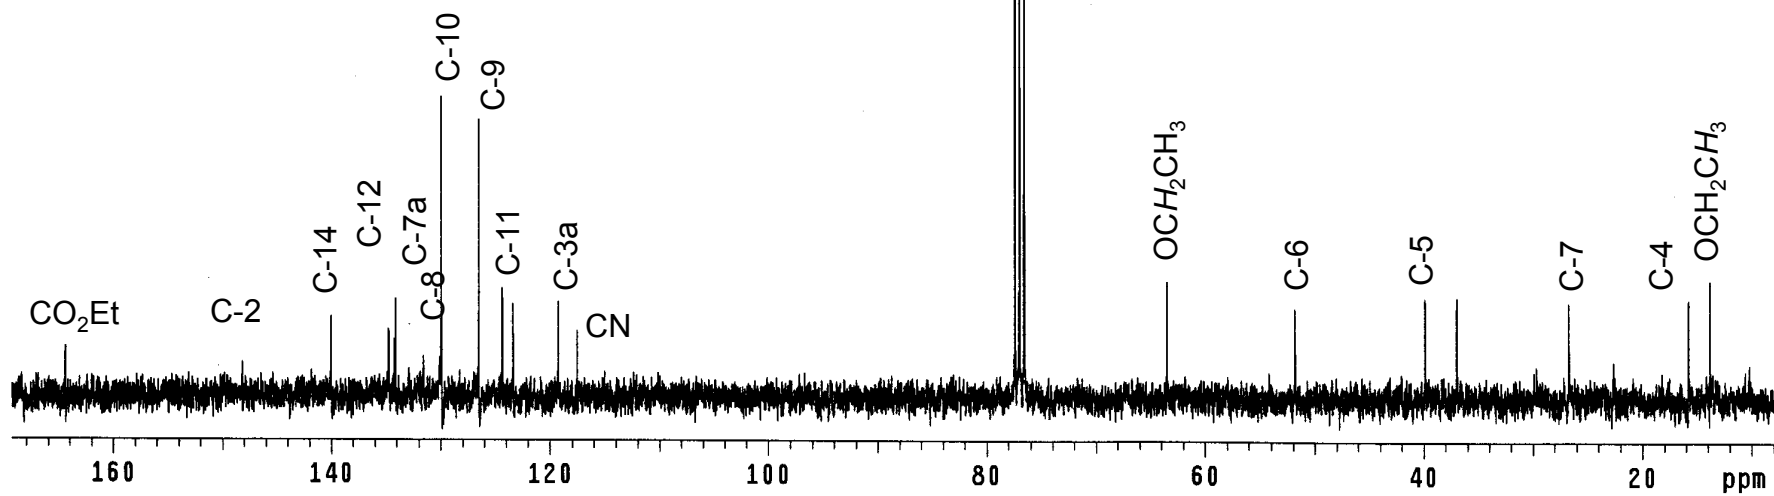

$^{13}\text{C}$  NMR ( $\text{CDCl}_3$ ) 13e

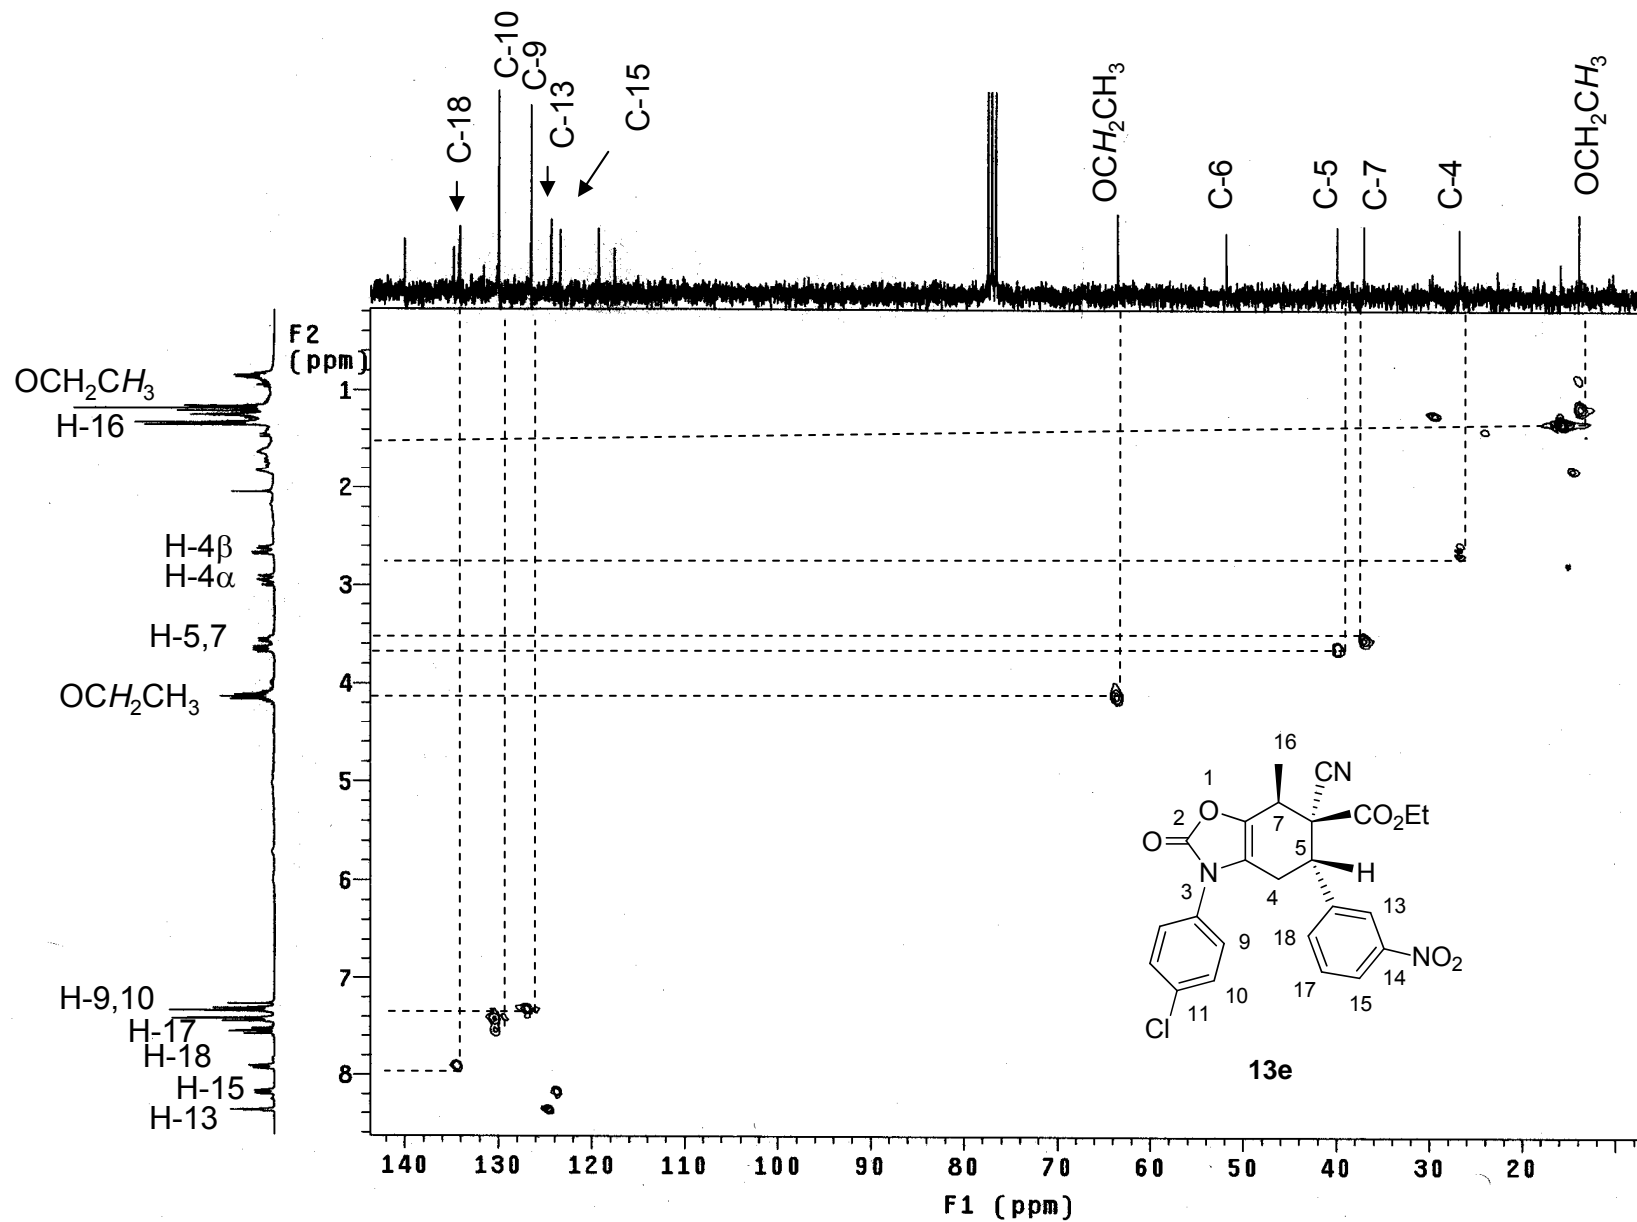

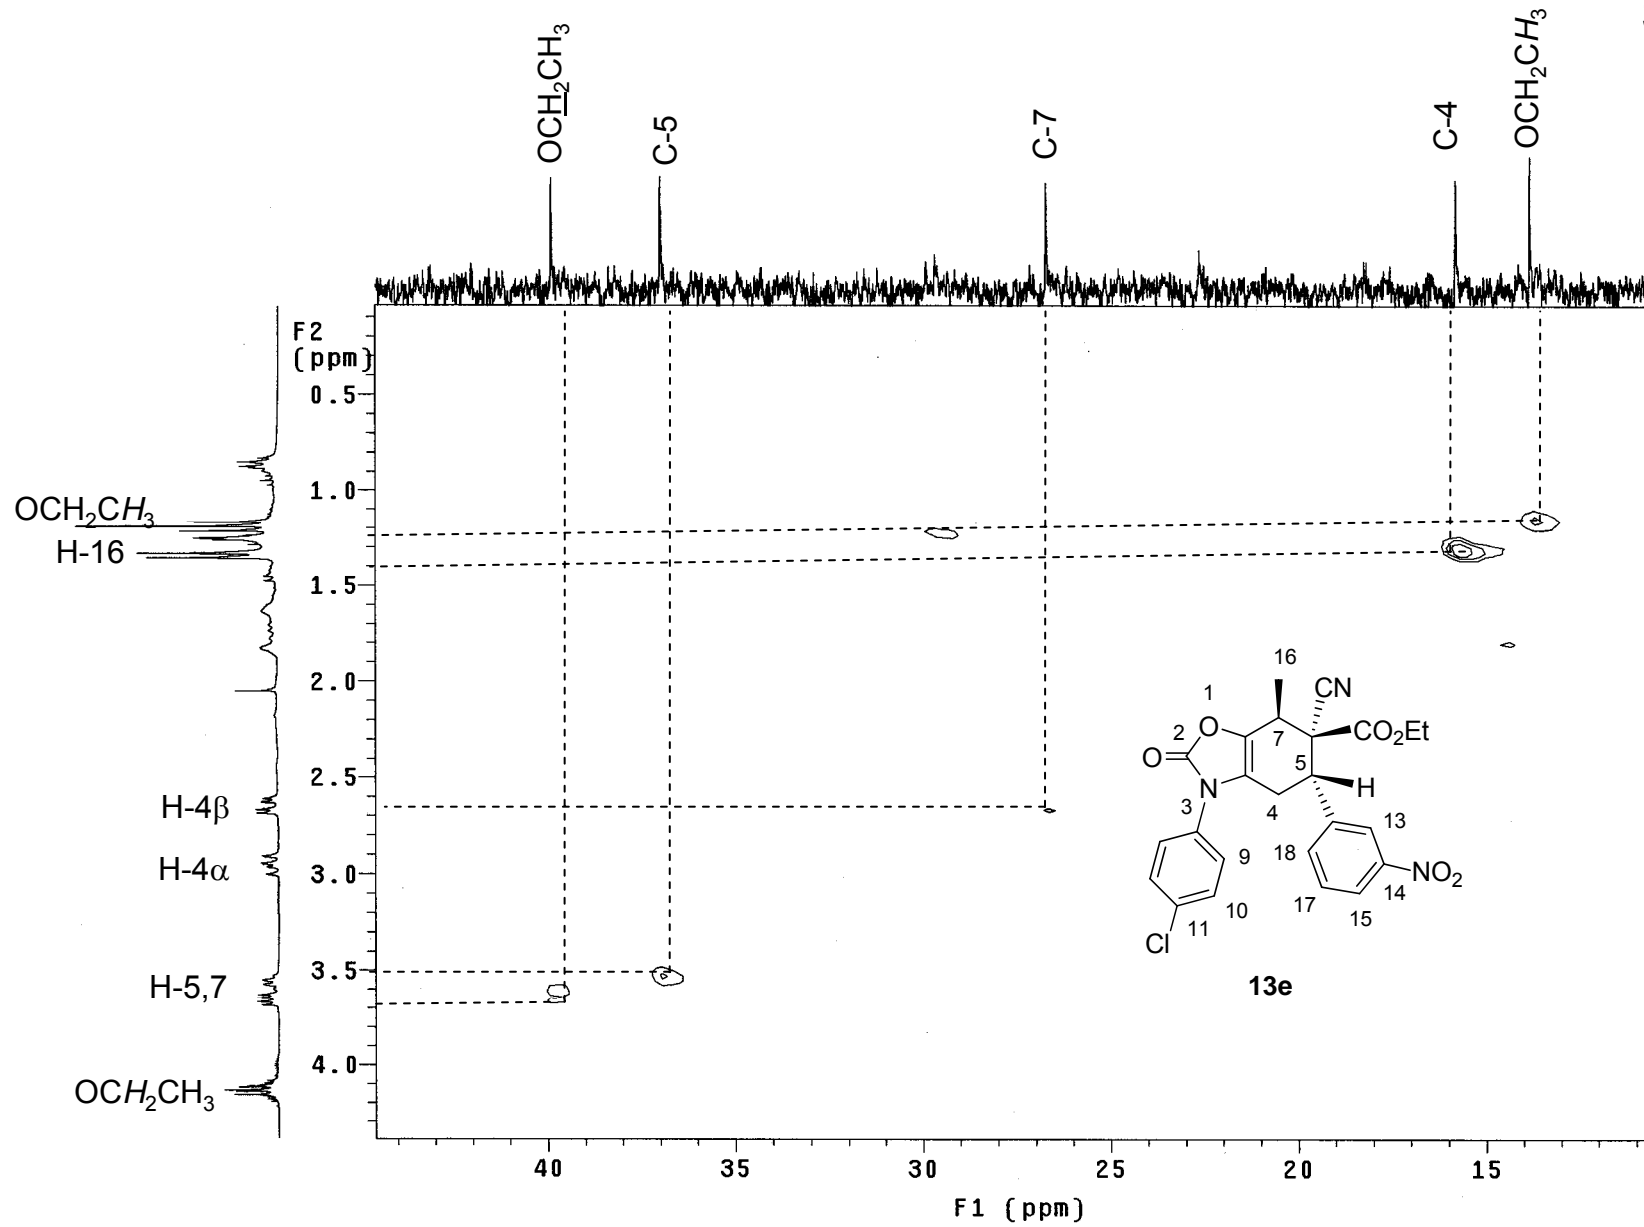

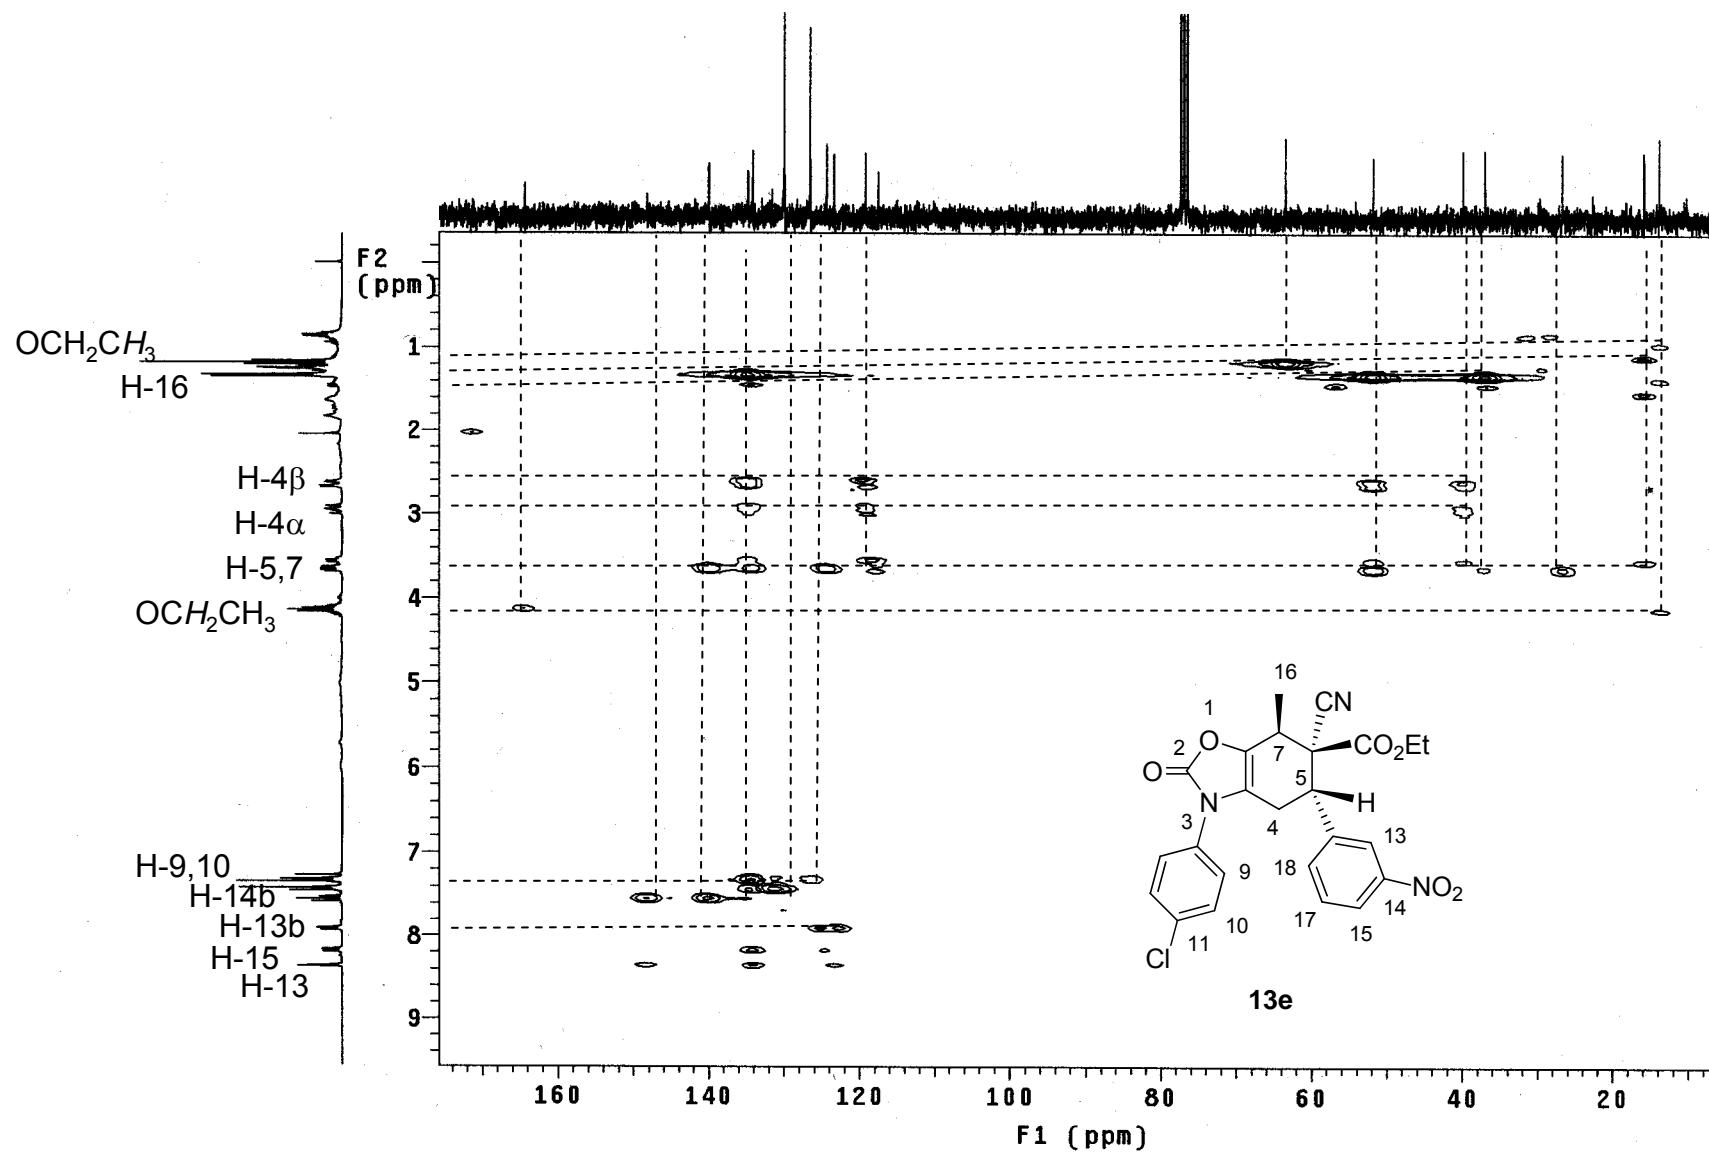

S101

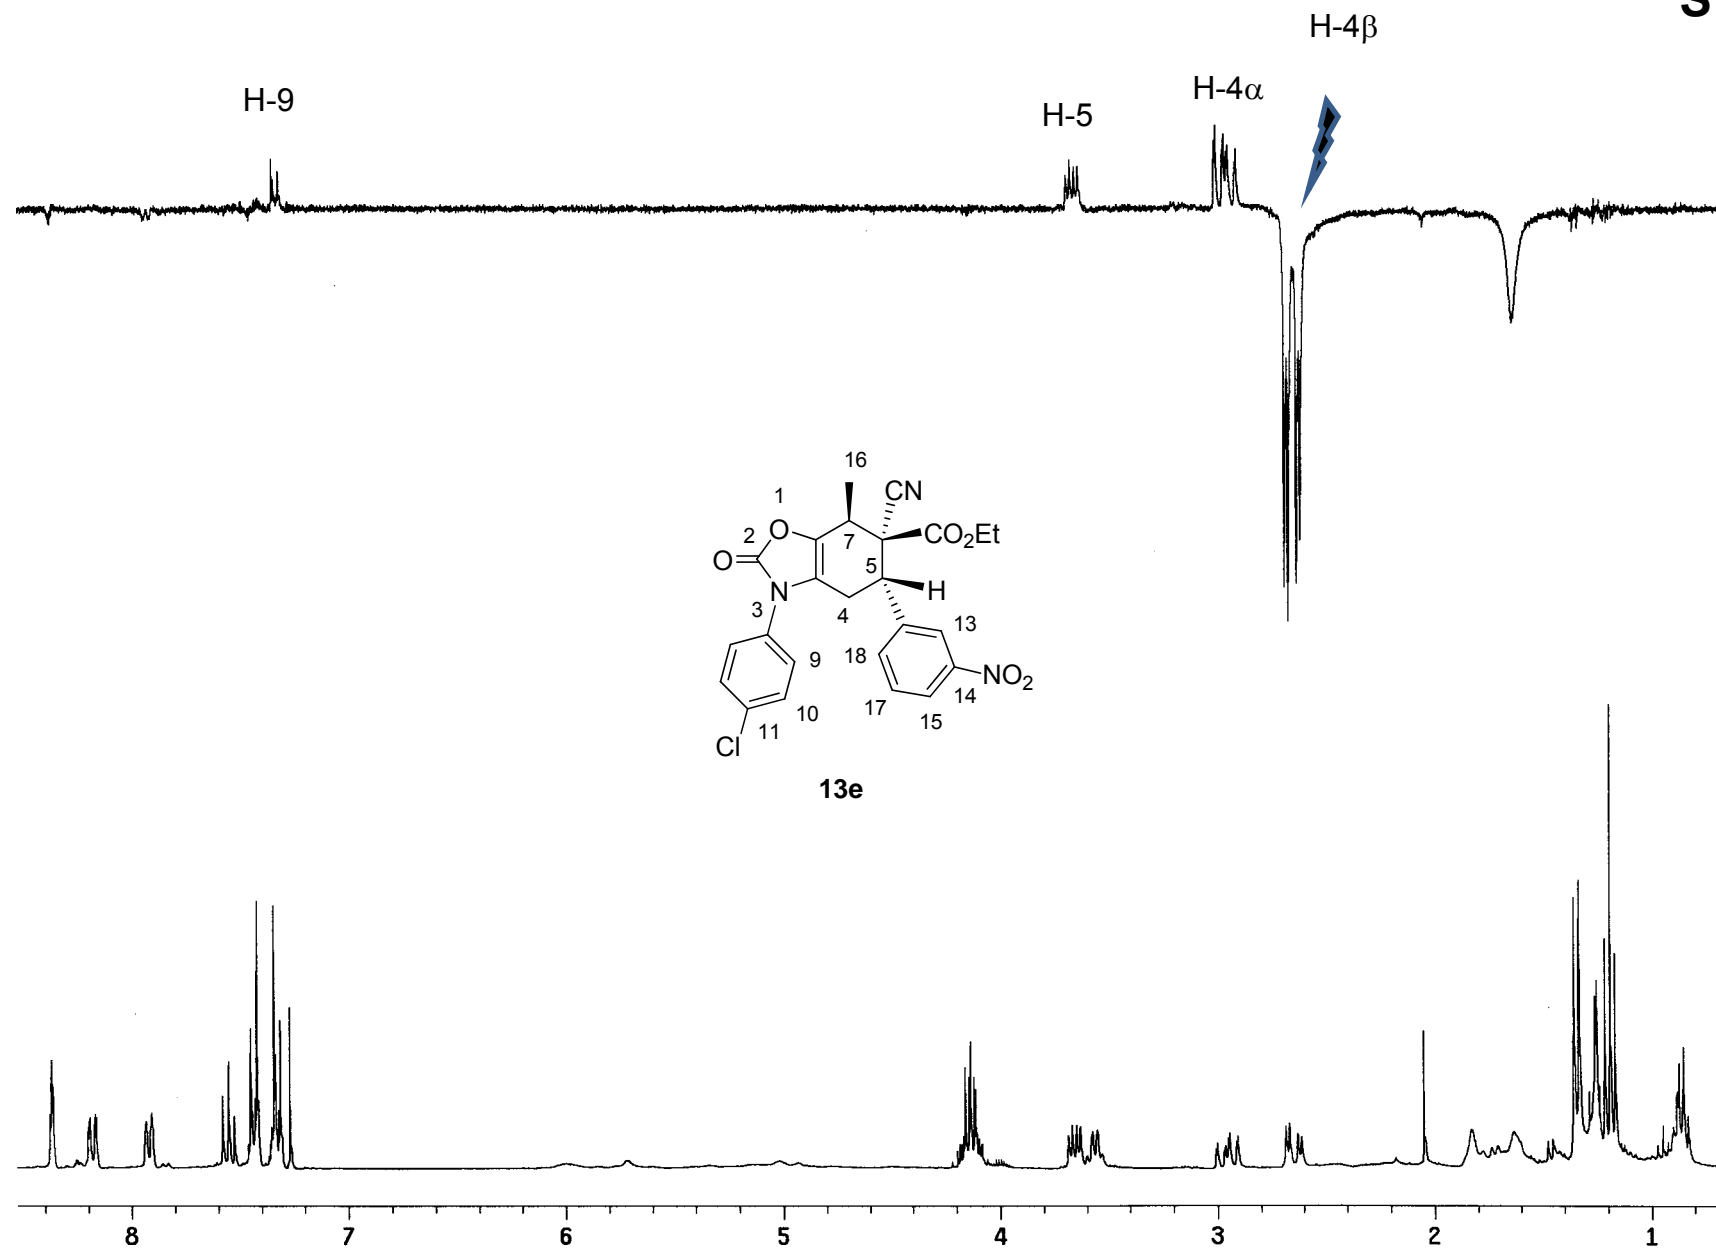

NOE experiment (CDCl<sub>3</sub>) 13e

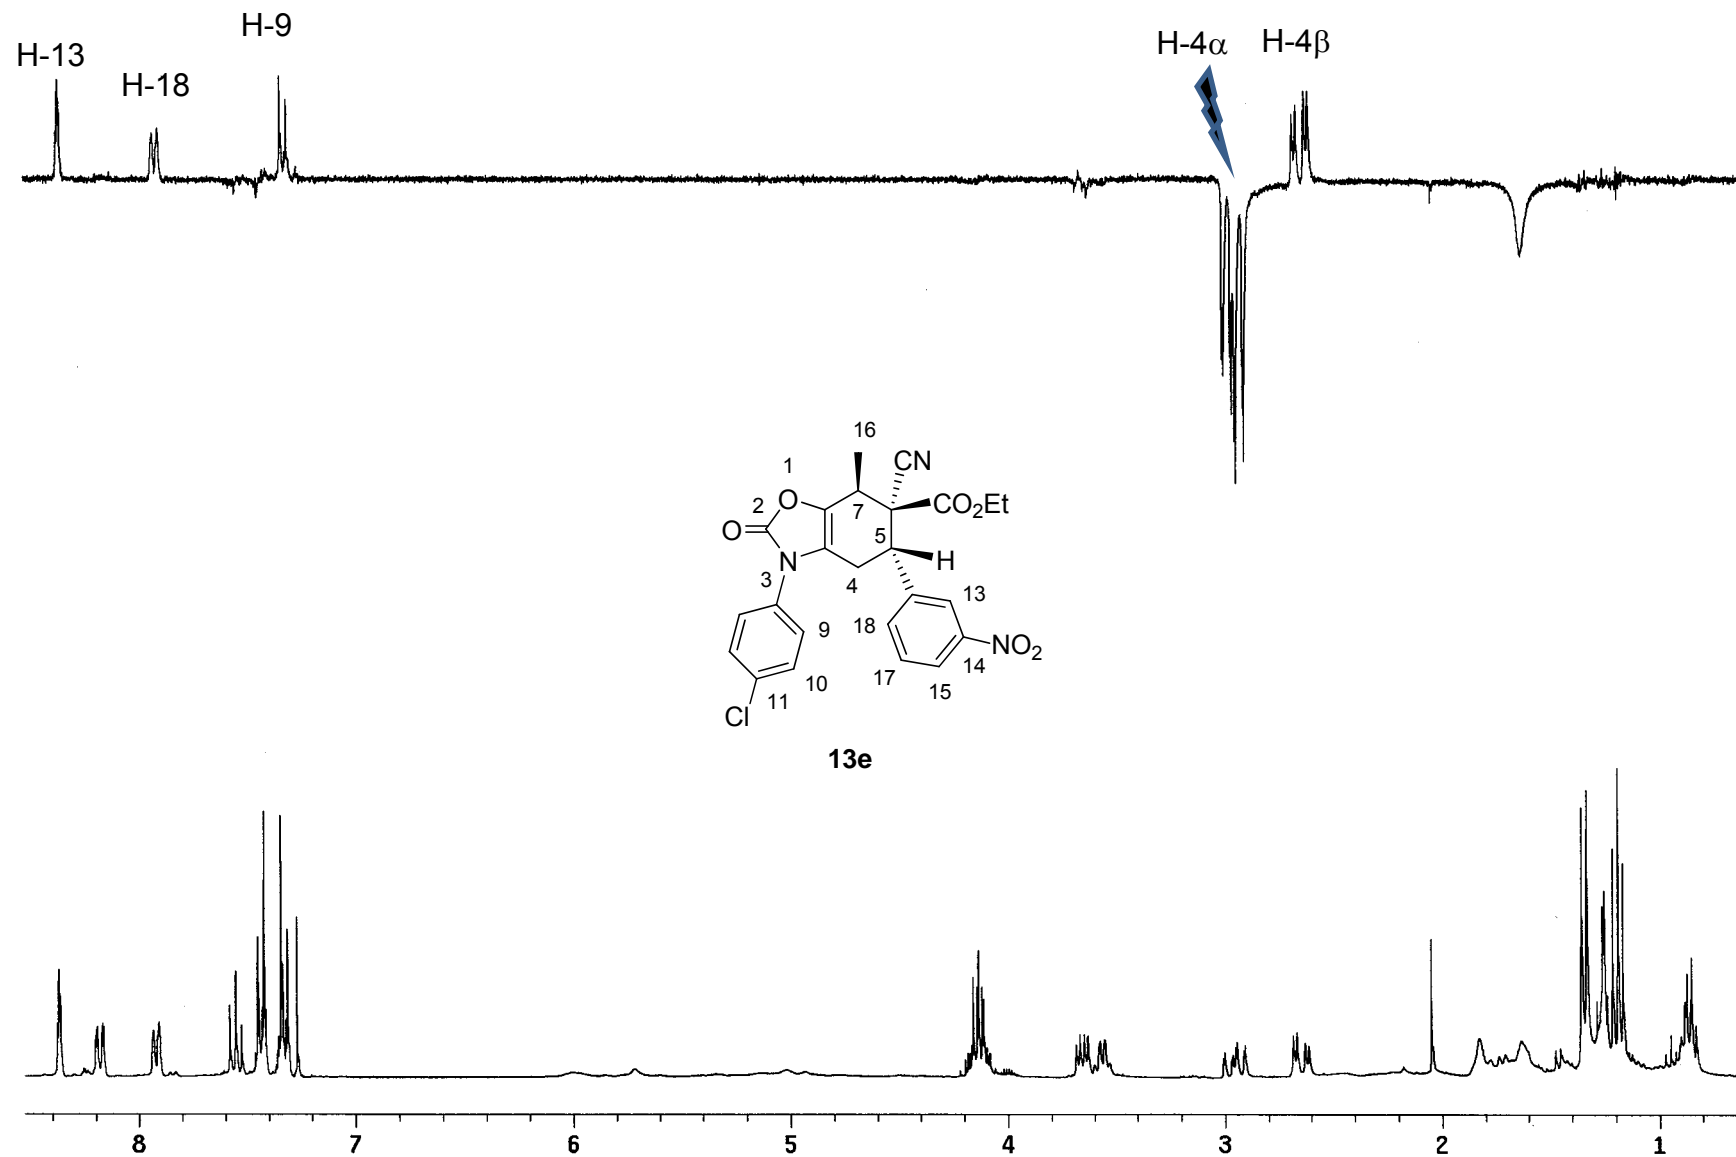NOE experiment (CDCl<sub>3</sub>) **13e**

S103

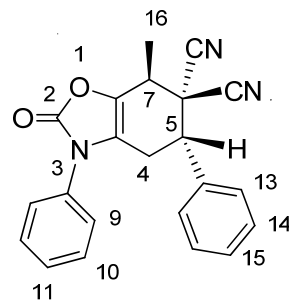

15a

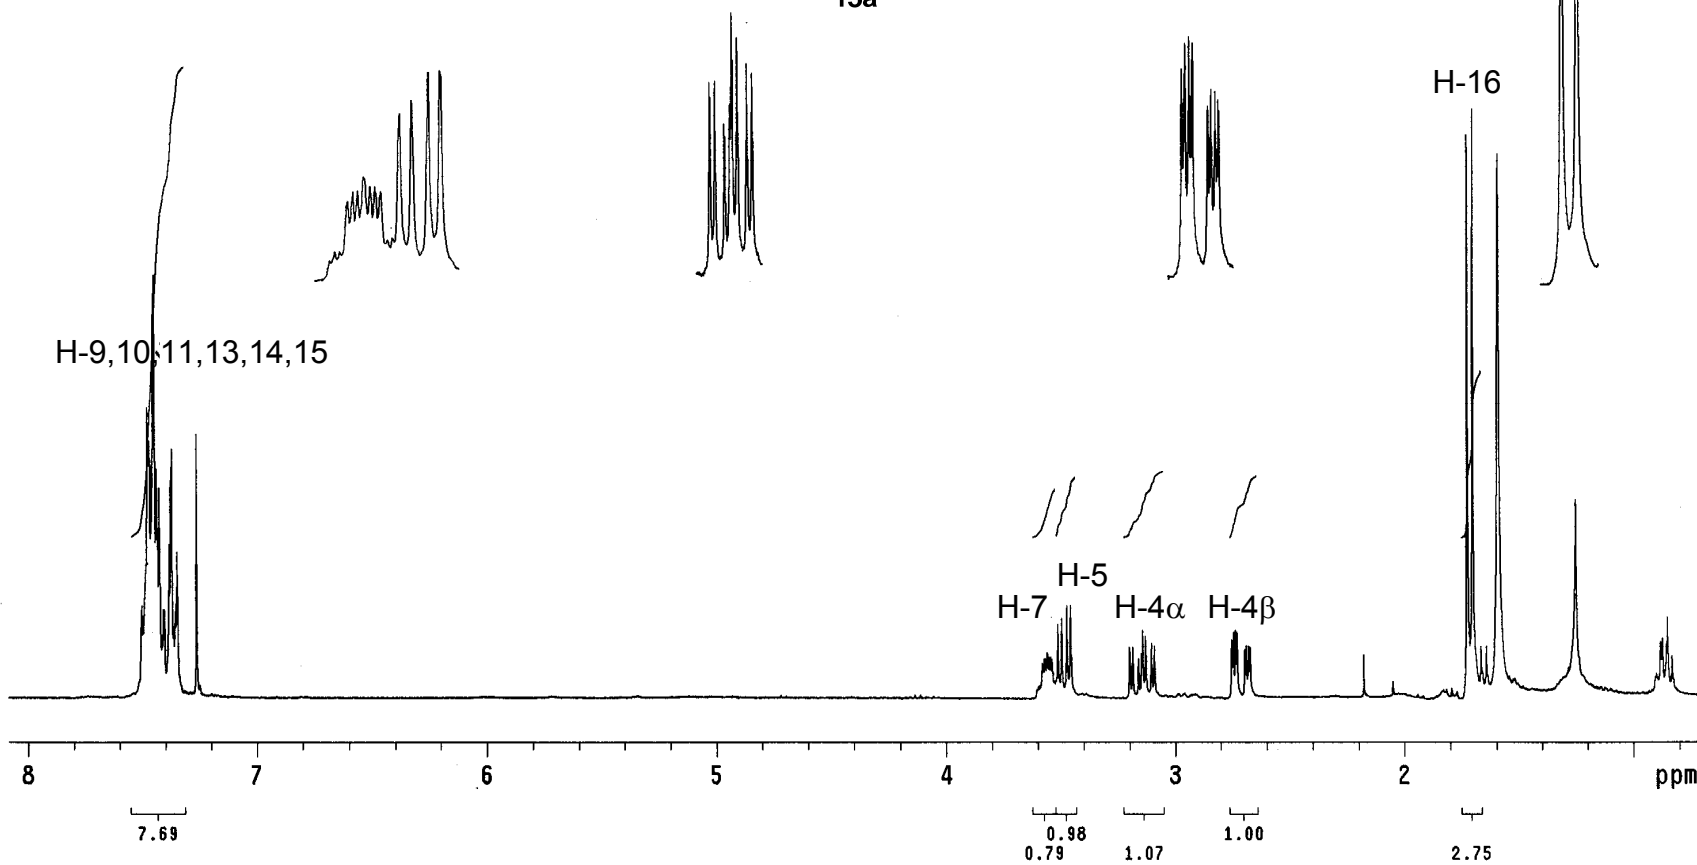

$^1\text{H}$  NMR ( $\text{CDCl}_3$ ) 15a



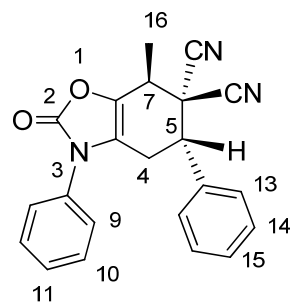**15a**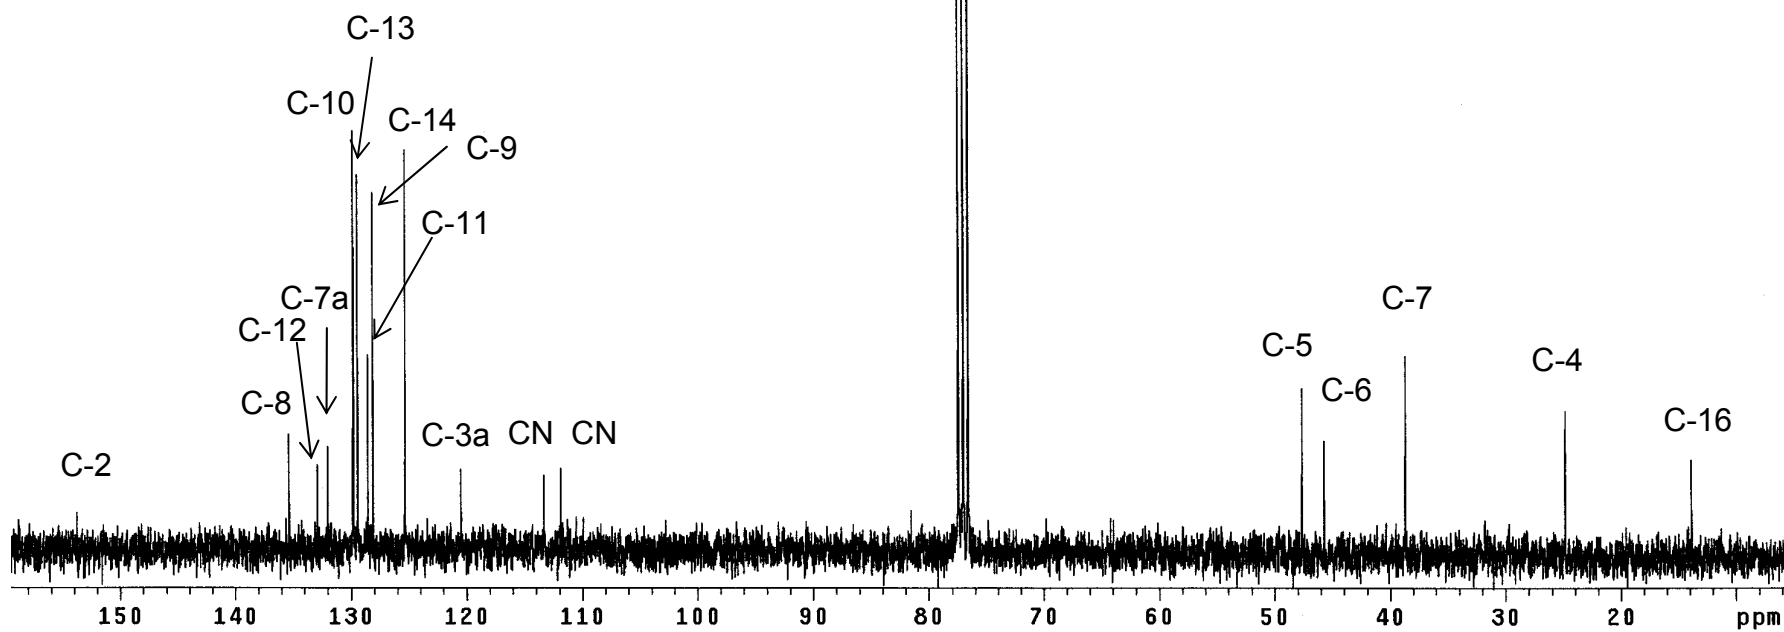 $^{13}\text{C}$  NMR ( $\text{CDCl}_3$ ) **15a**

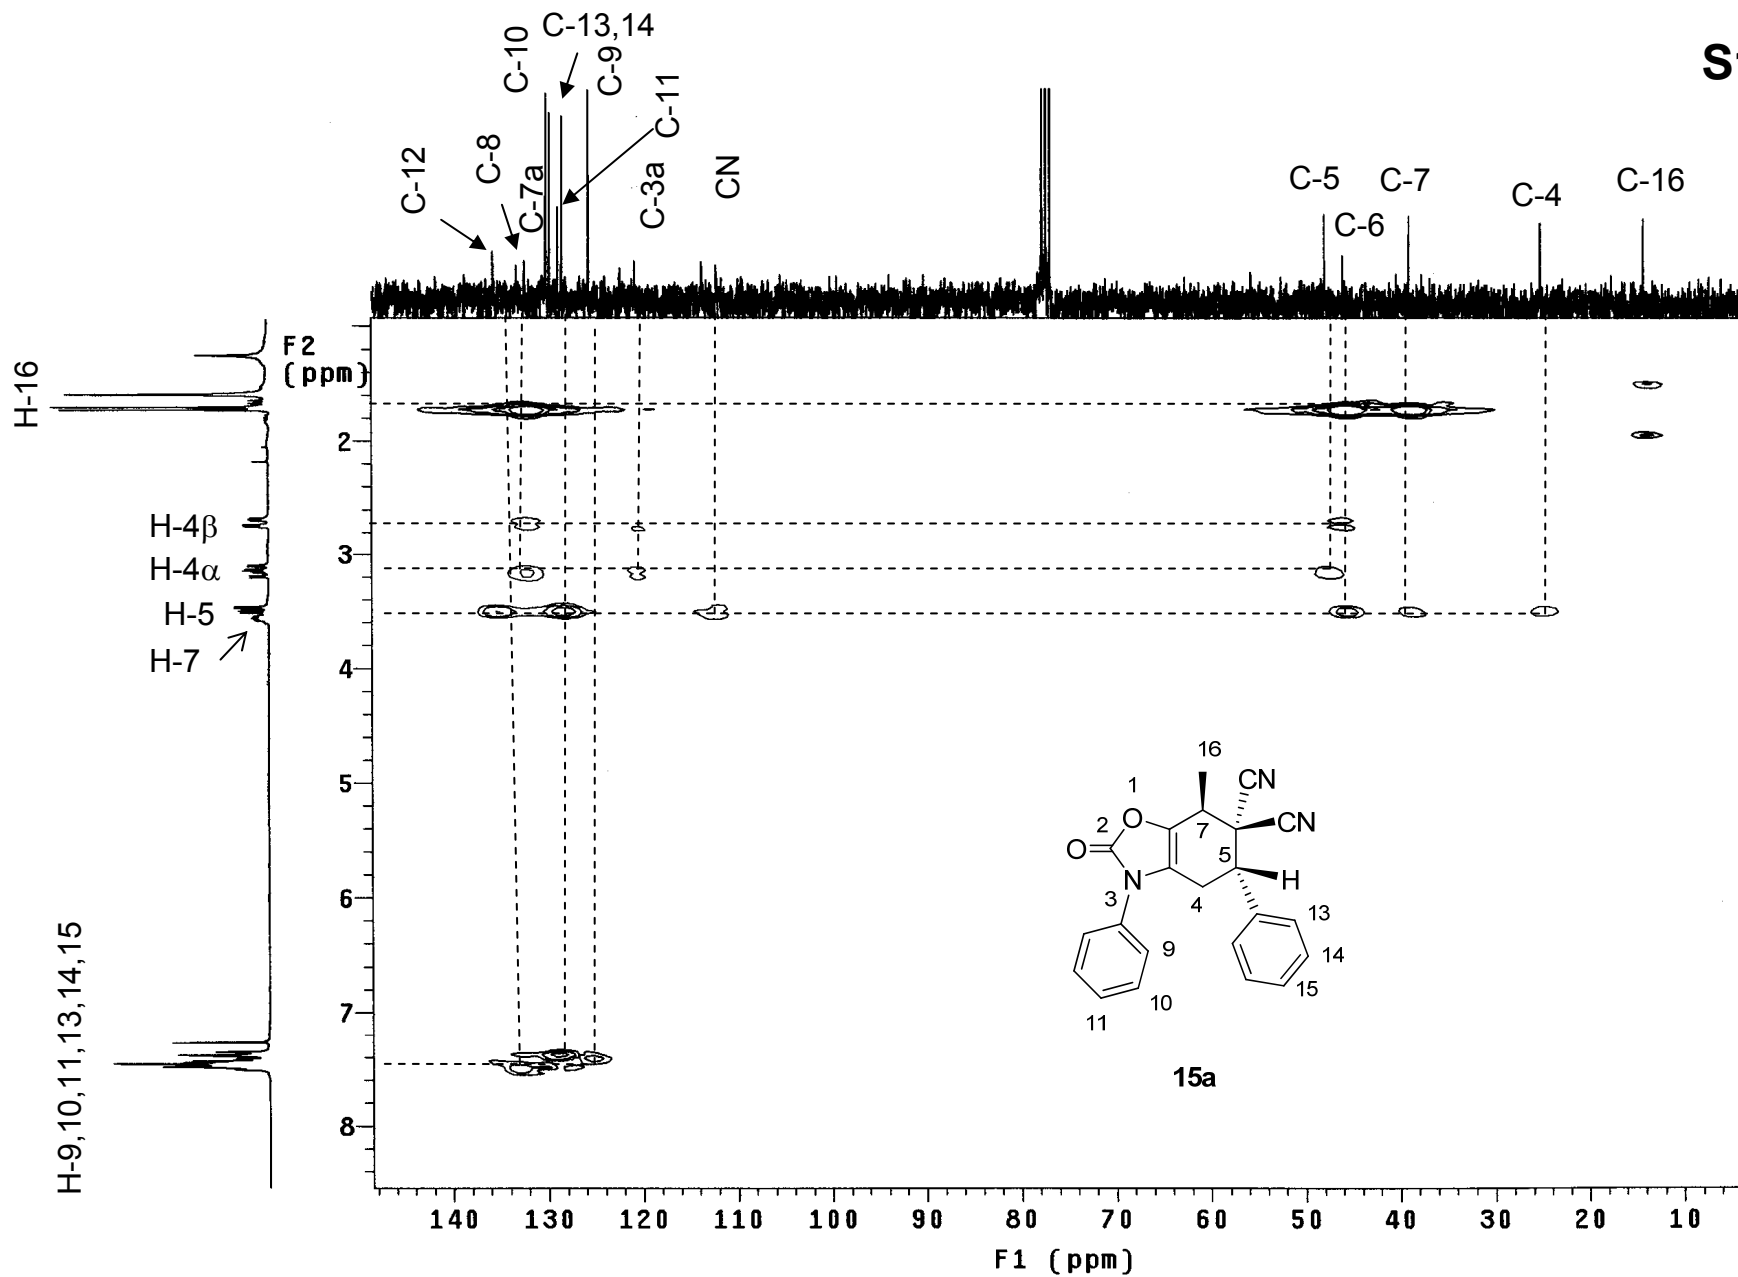

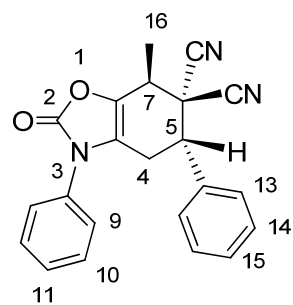

15a

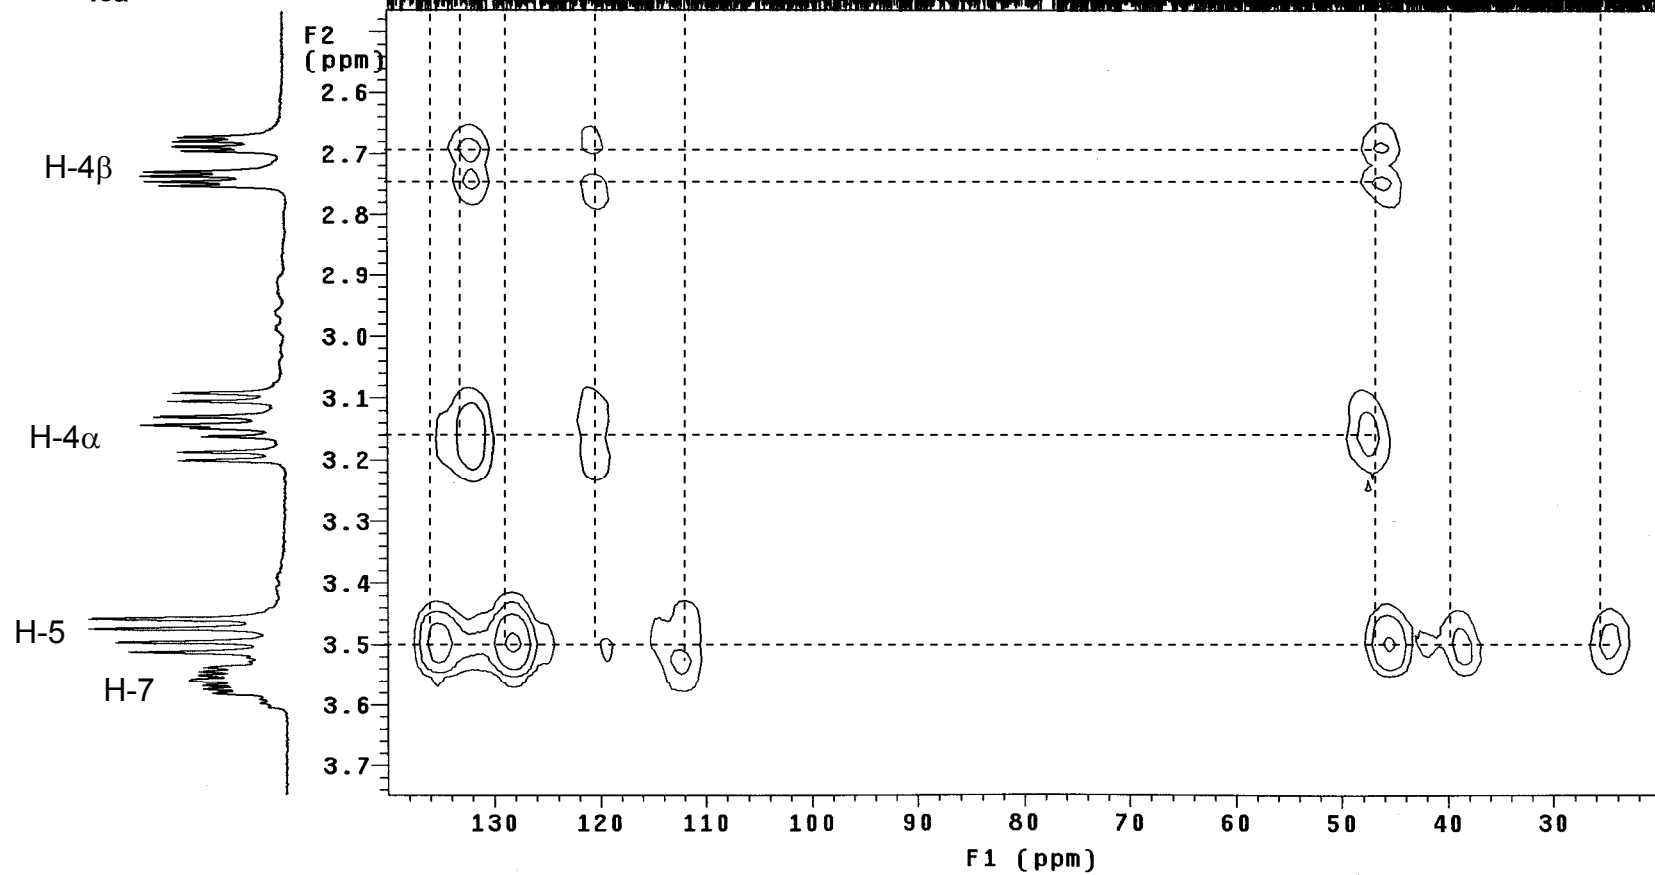

S107

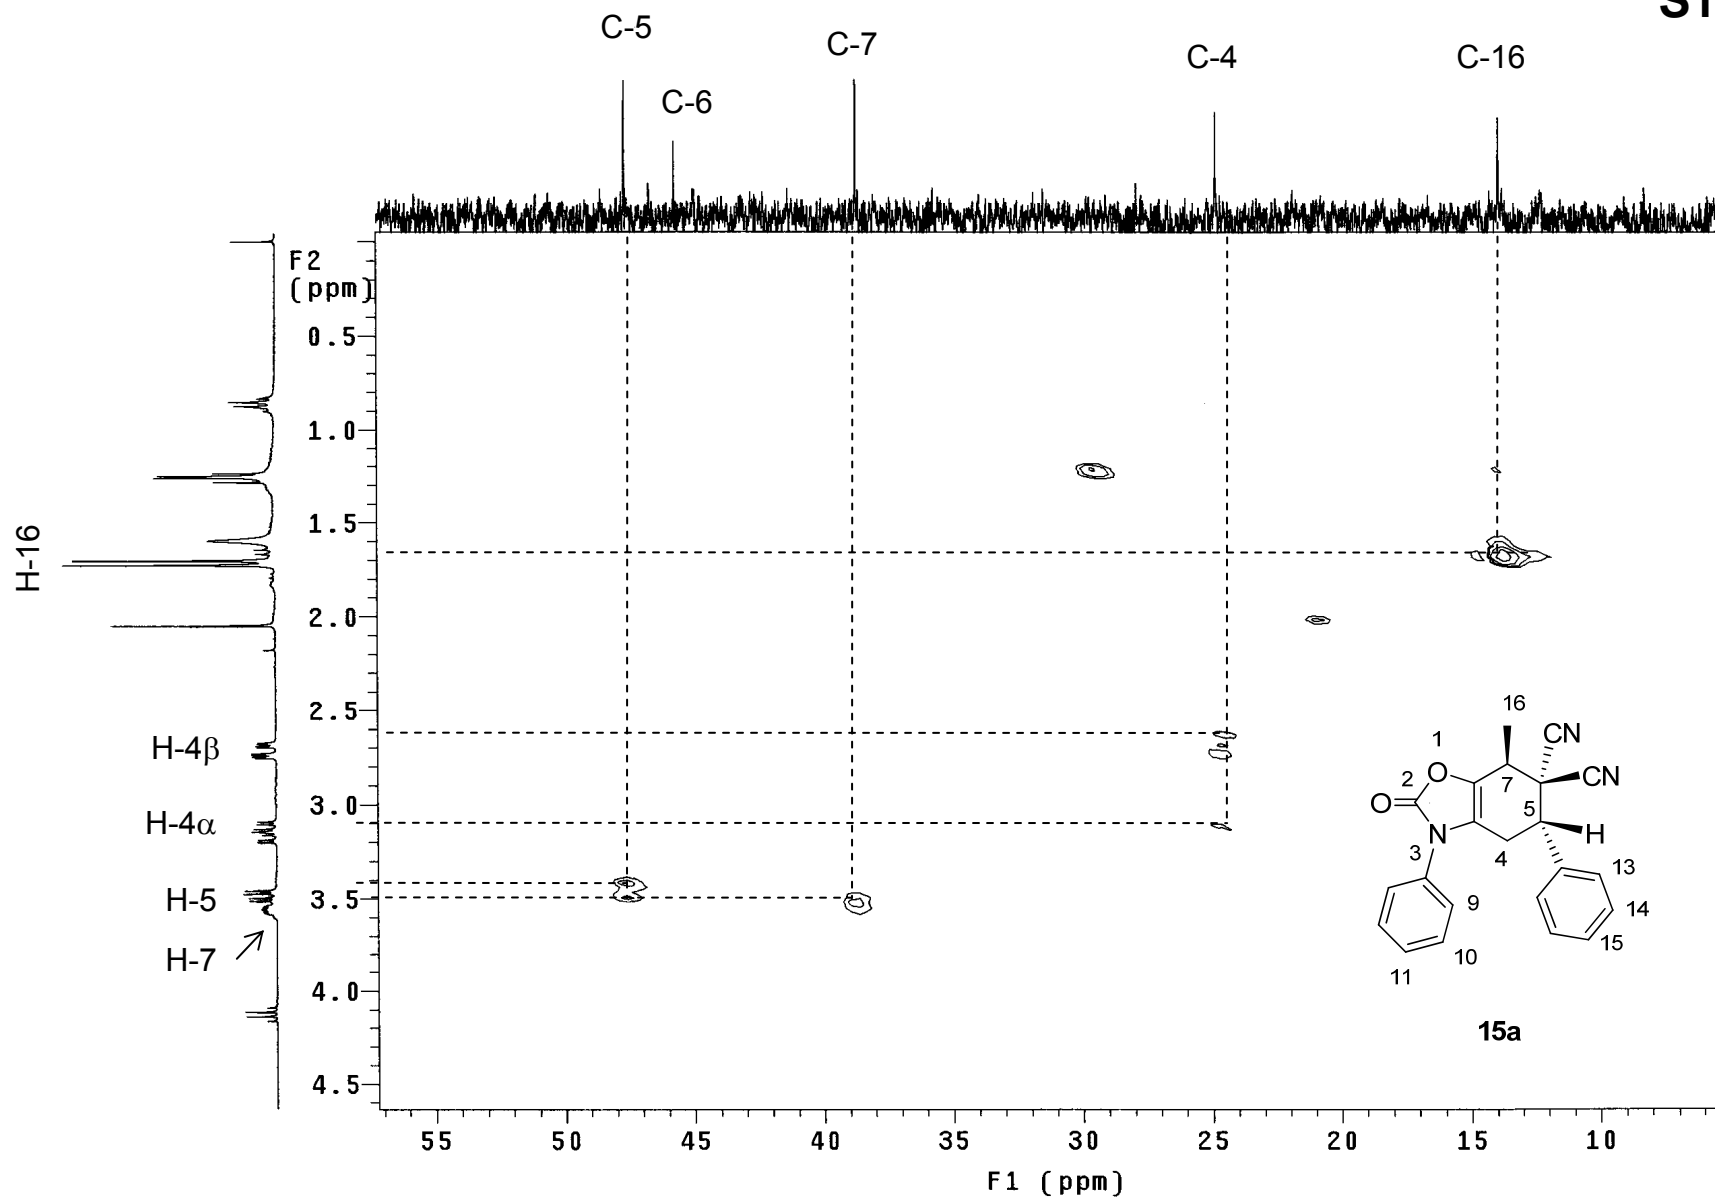

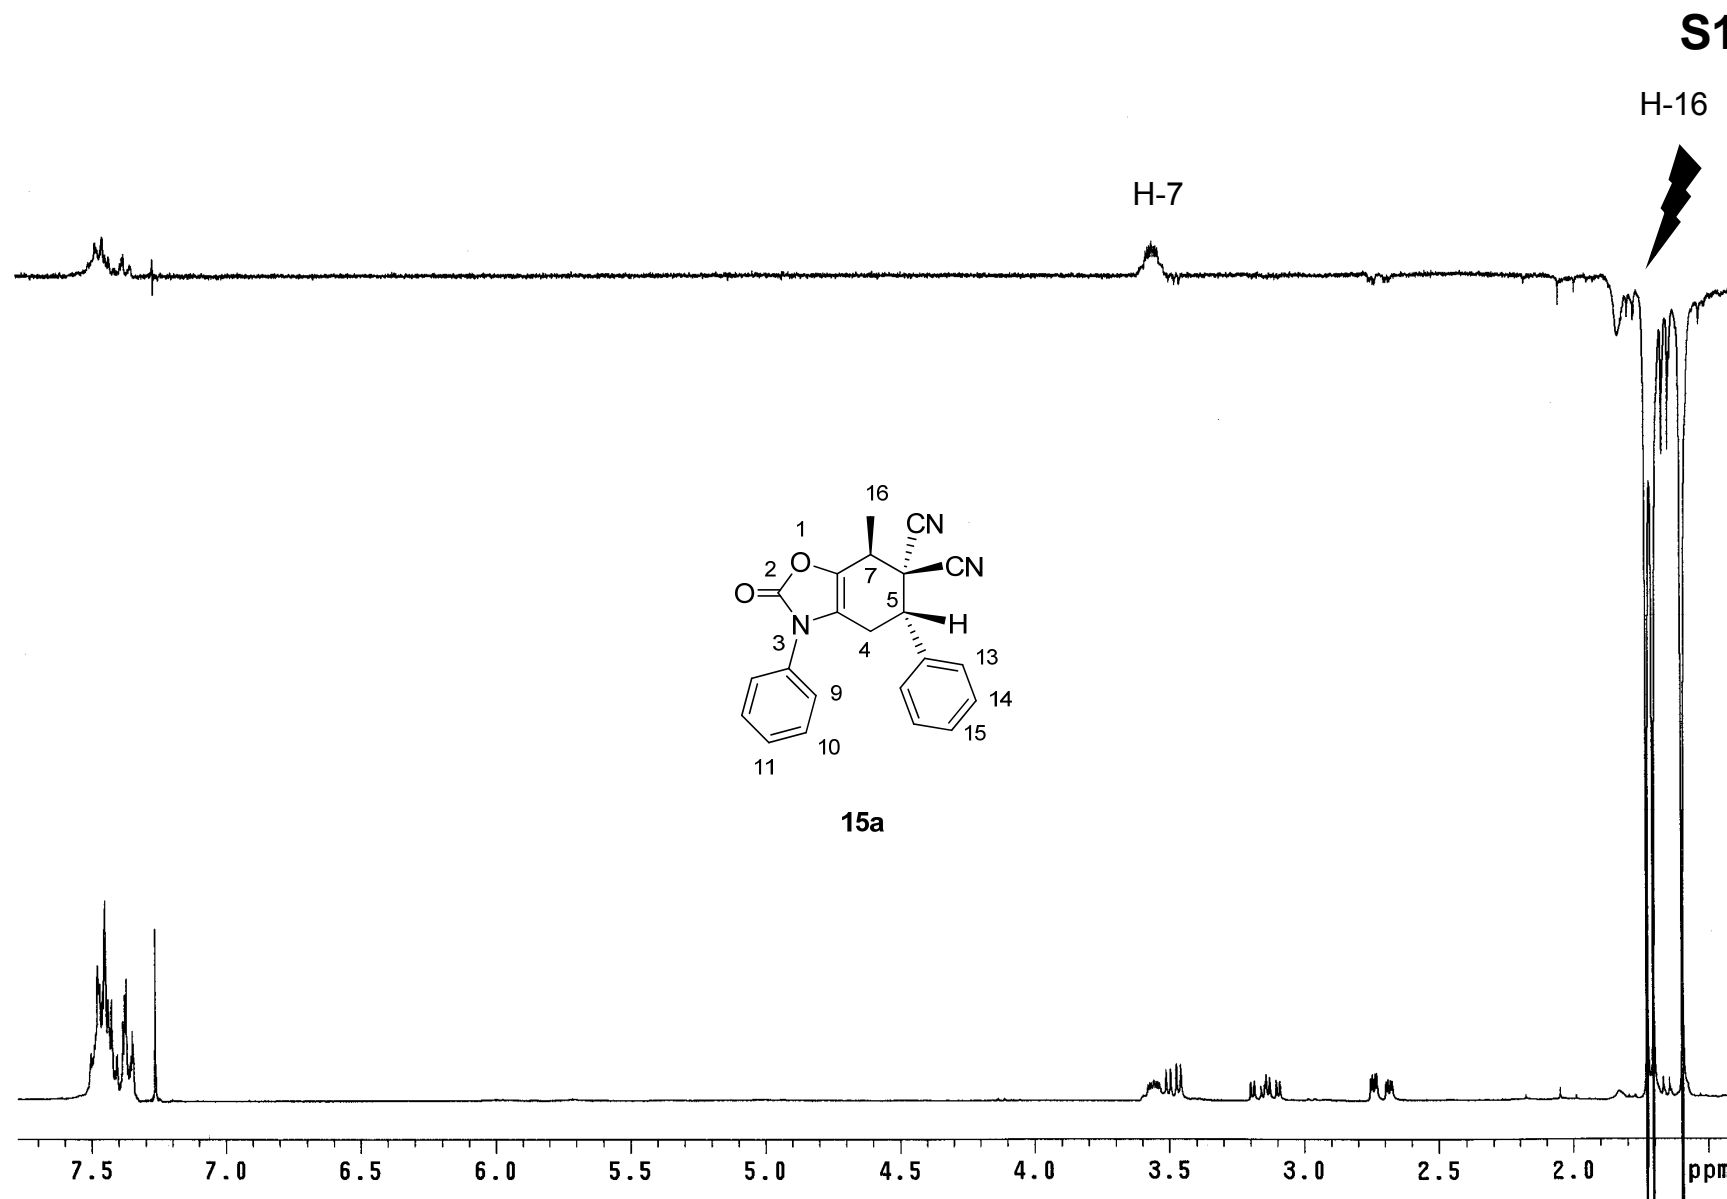

NOE experiment (CDCl<sub>3</sub>) **15a**

S109

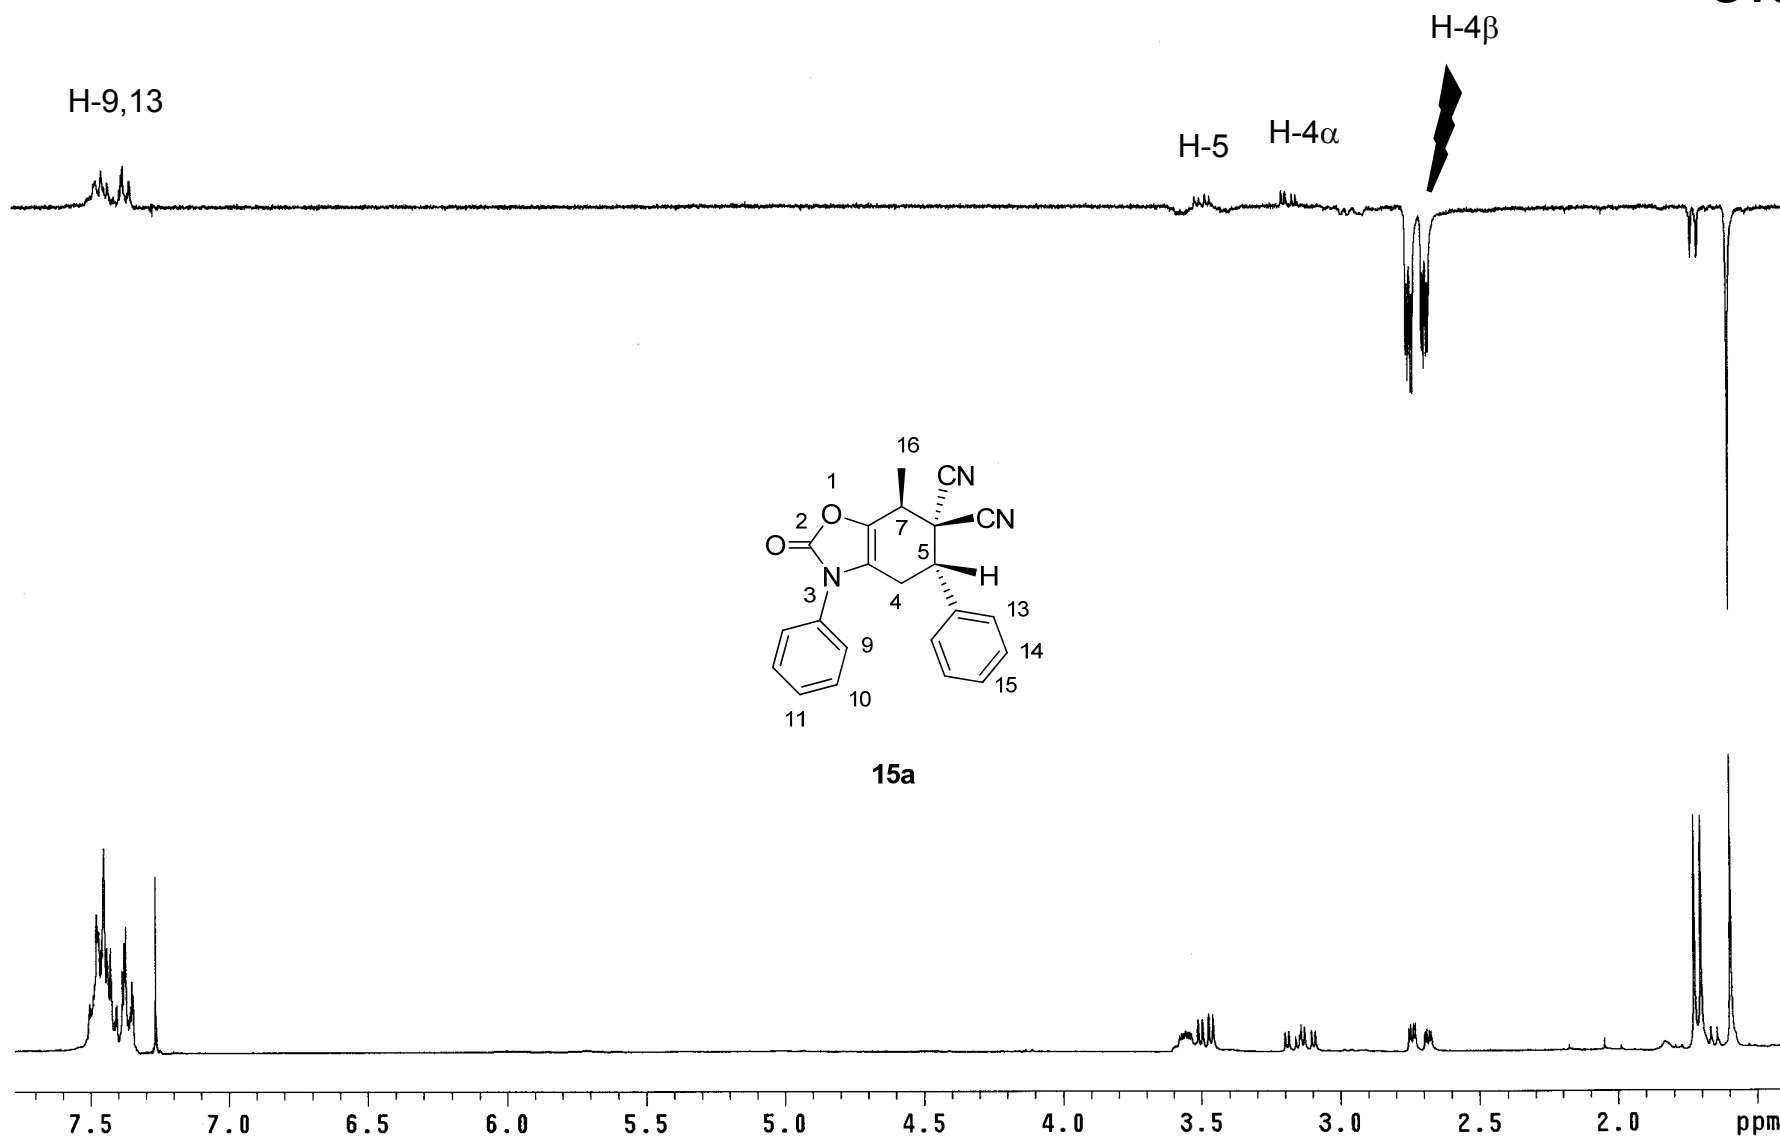

NOE experiment (CDCl<sub>3</sub>) 15a

S110

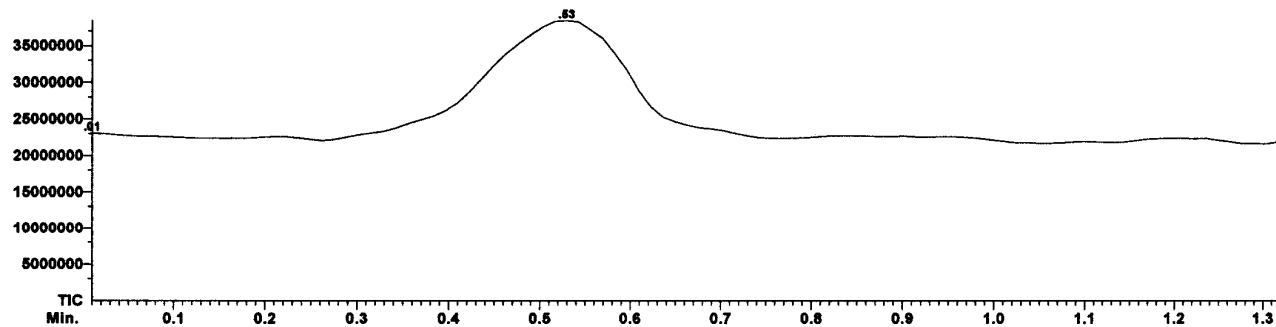

Scan: 40-43

R.T.: .55

Base: m/z 201; 73.4%FS TIC: 2356892

#Ions: 3039

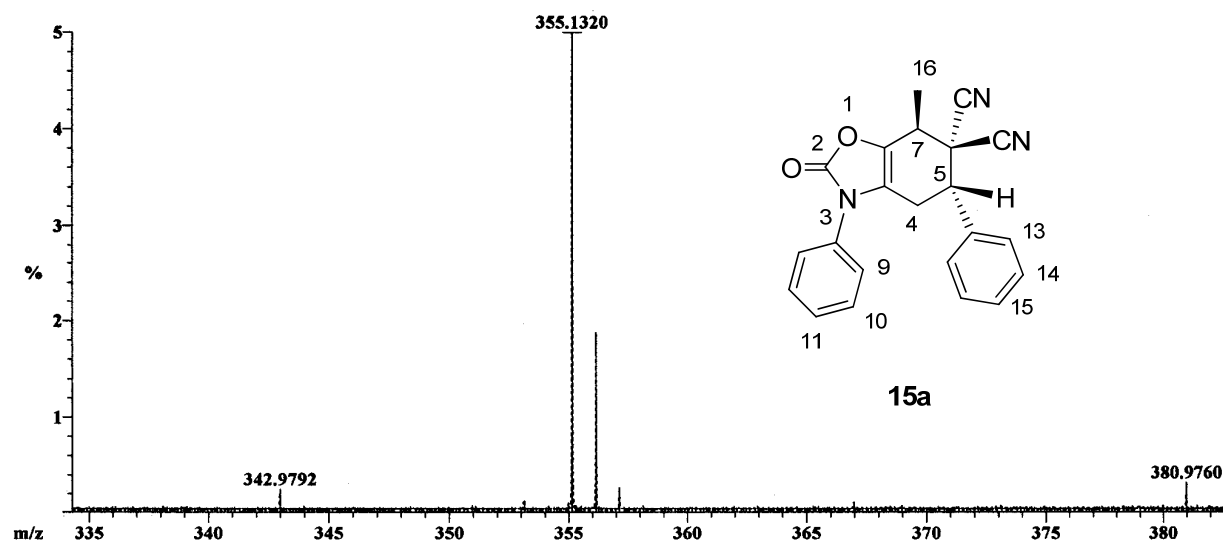

Selected Isotopes : H<sub>0-20</sub>C<sub>0-25</sub>N<sub>0-4</sub>O<sub>0-3</sub>

Error Limit : 1 mmu

| <u>Measured Mass</u> | <u>% Base</u> | <u>Formula</u>                                                | <u>Calculated Mass</u> | <u>Error</u> |
|----------------------|---------------|---------------------------------------------------------------|------------------------|--------------|
| 355.13199            | 6.2%          | C <sub>22</sub> H <sub>17</sub> N <sub>3</sub> O <sub>2</sub> | 355.13208              | -0.1         |

HRMS 15a

S111

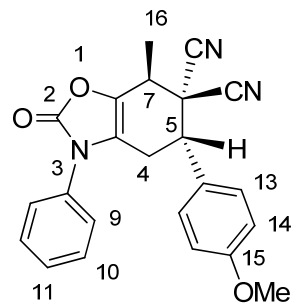

**15b**

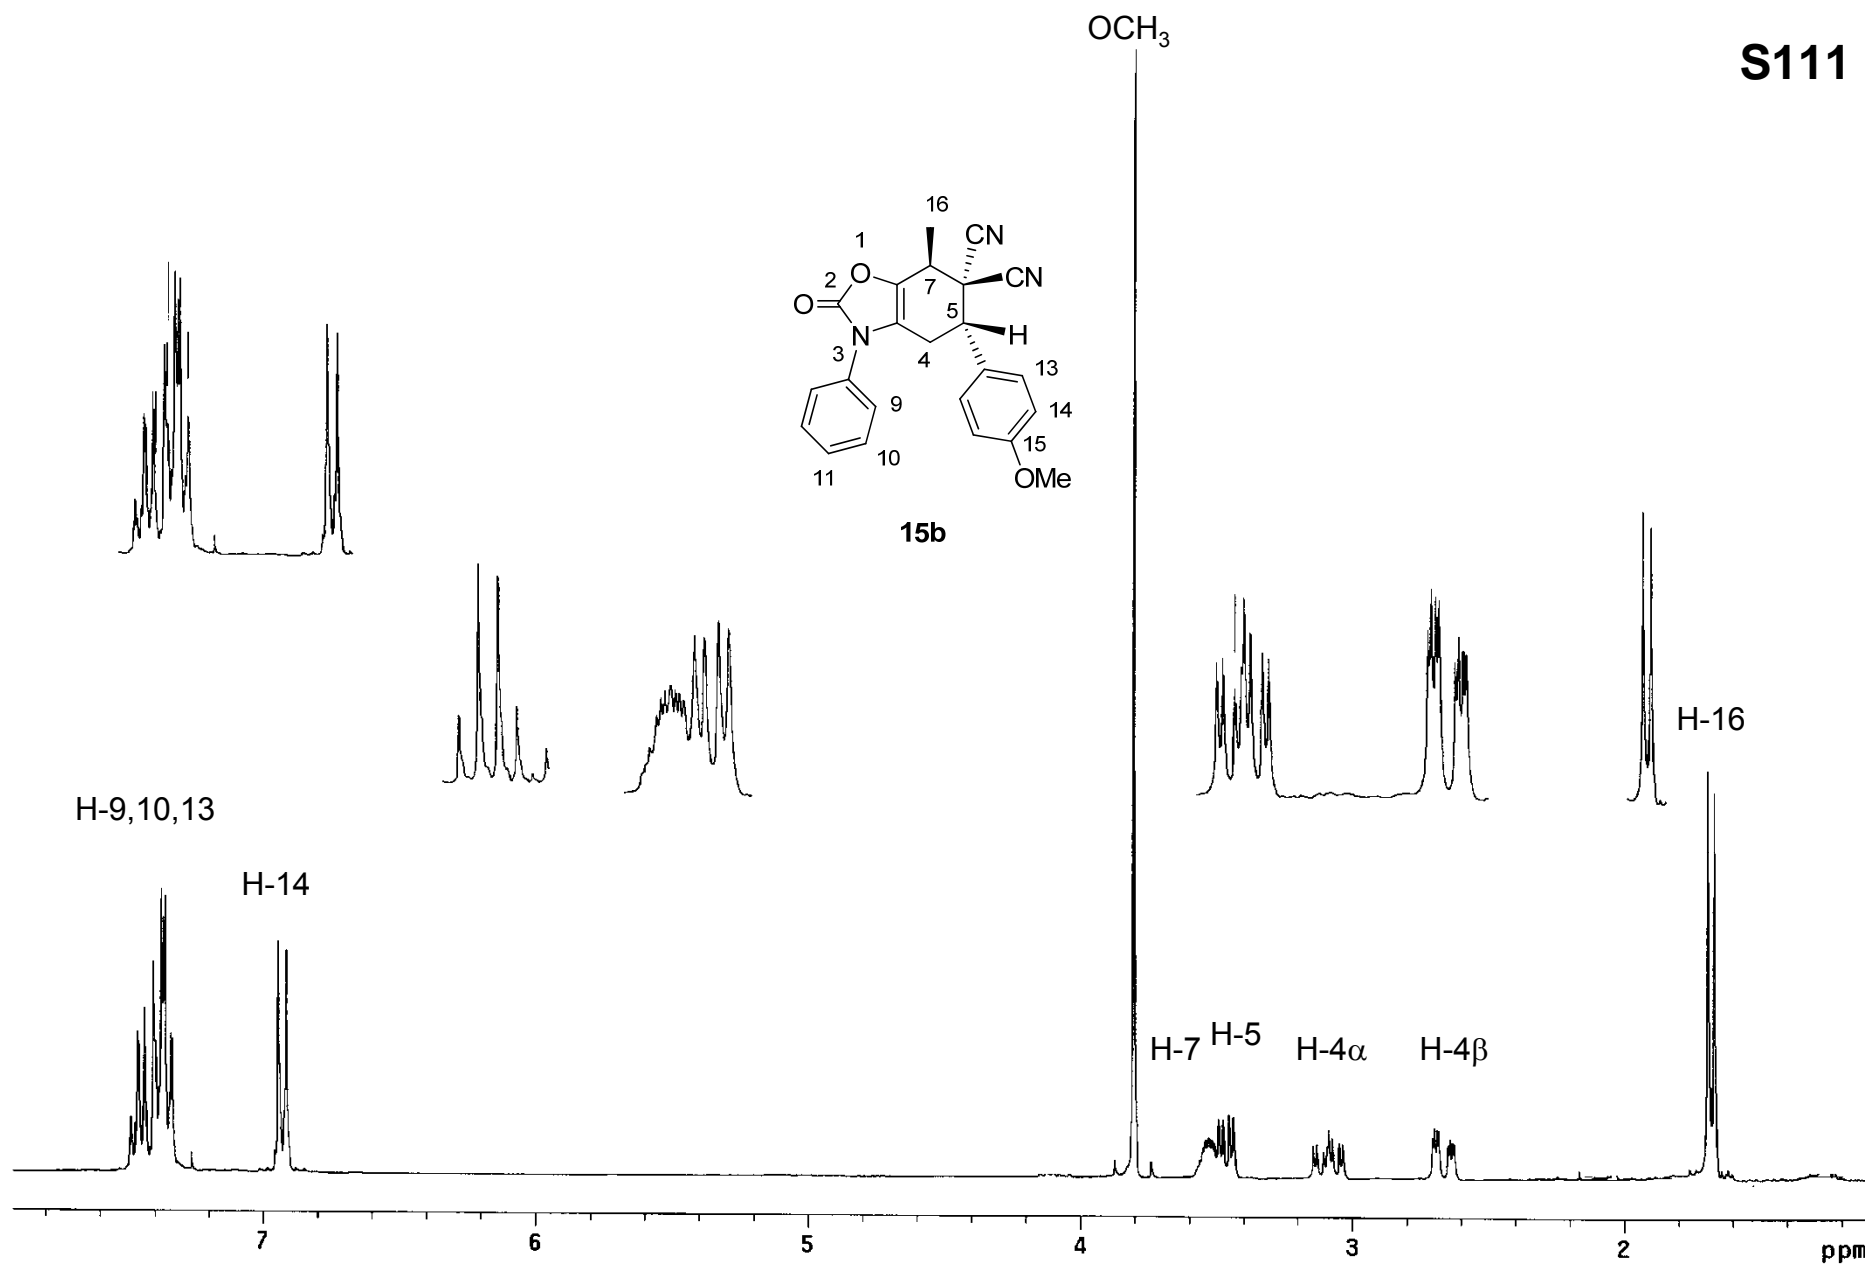

<sup>1</sup>H NMR (CDCl<sub>3</sub>) **15b**



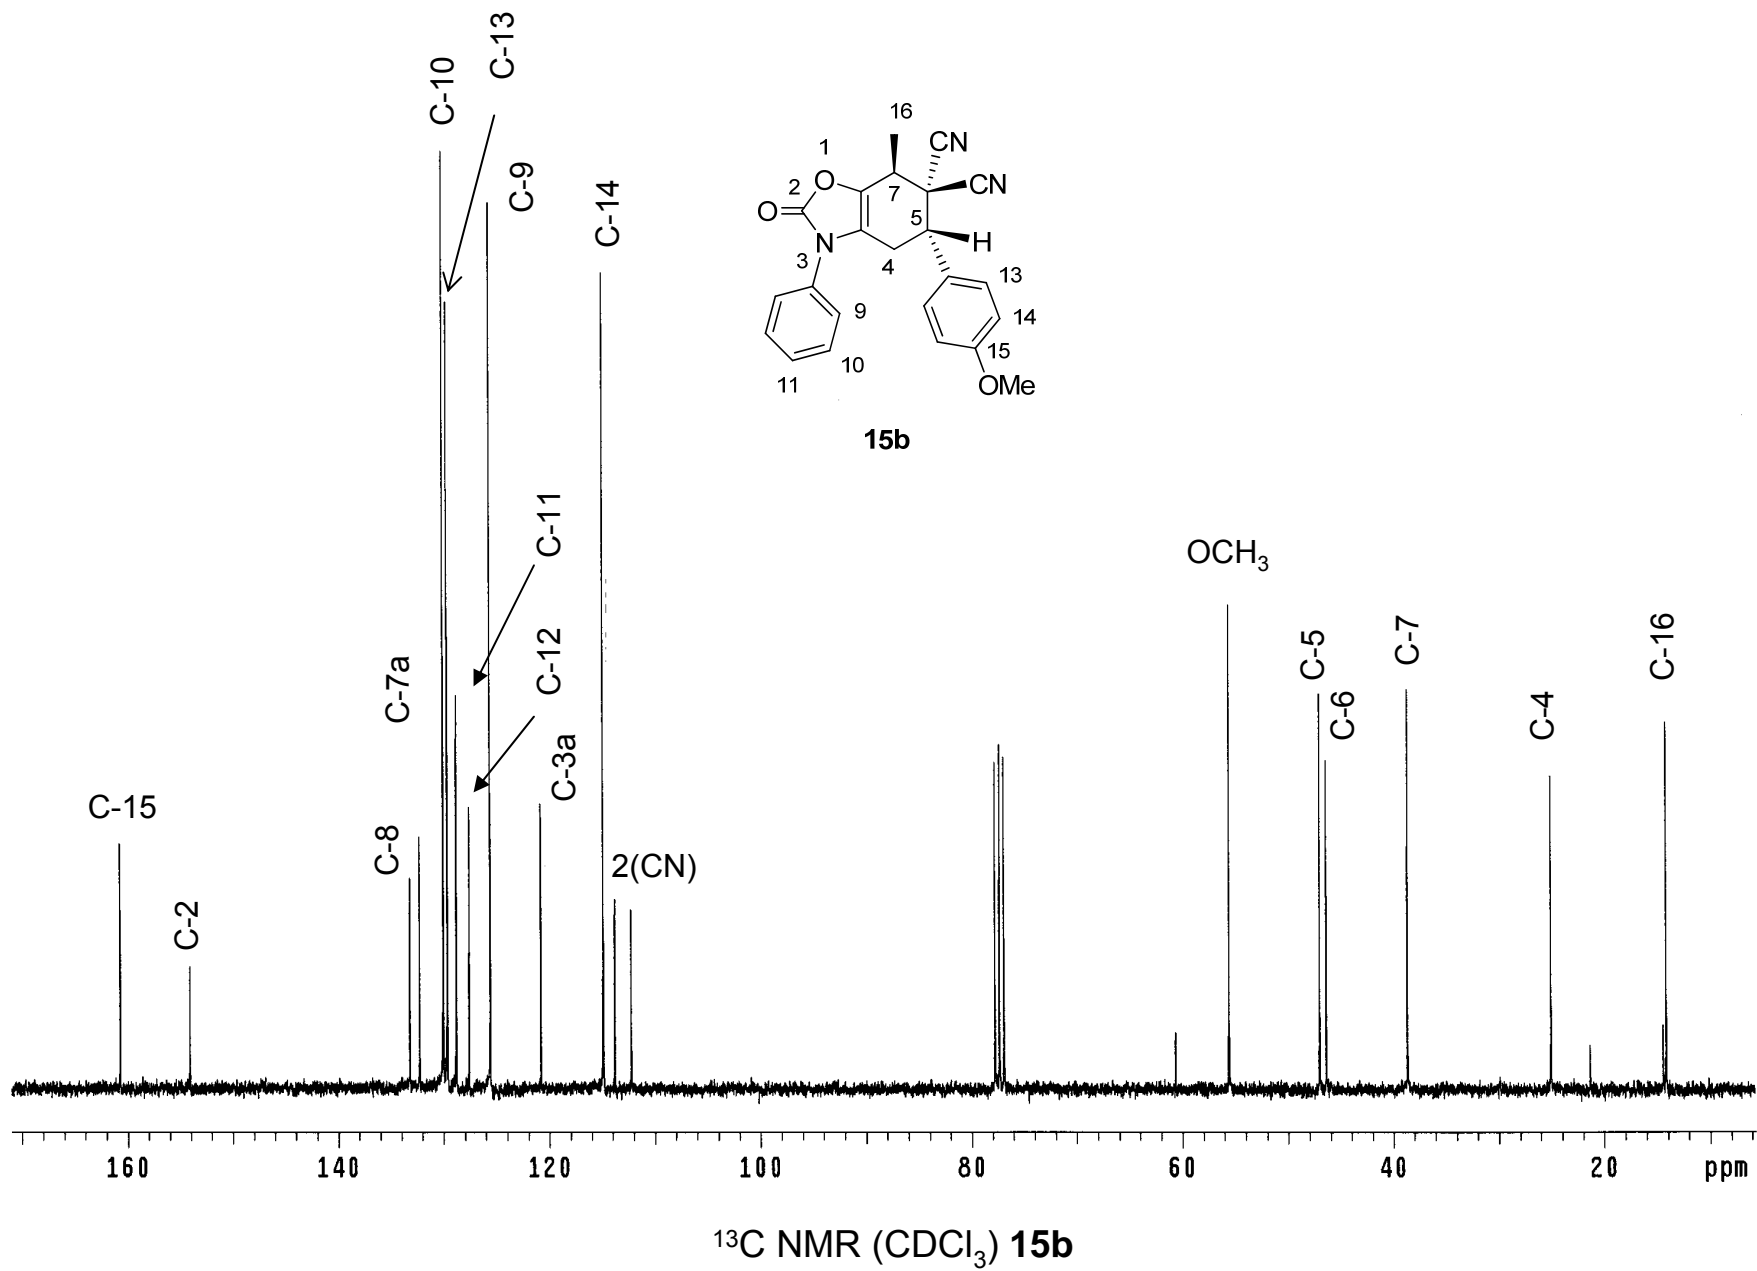

S113

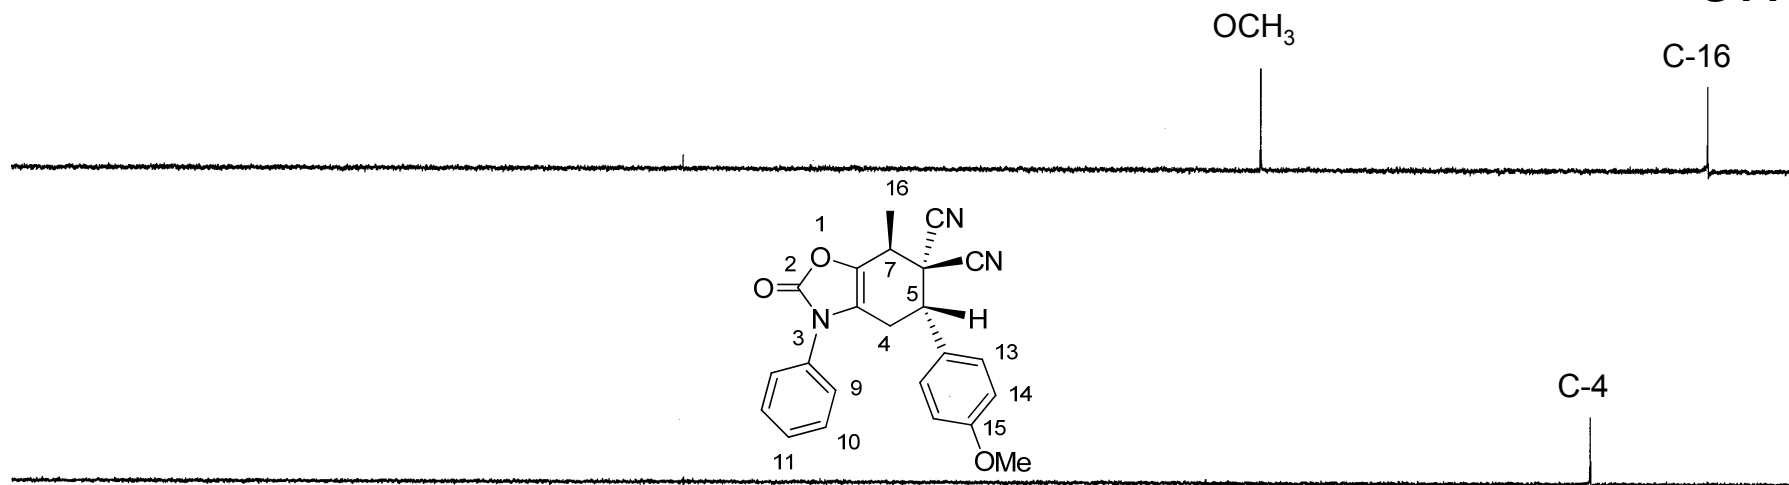

15b

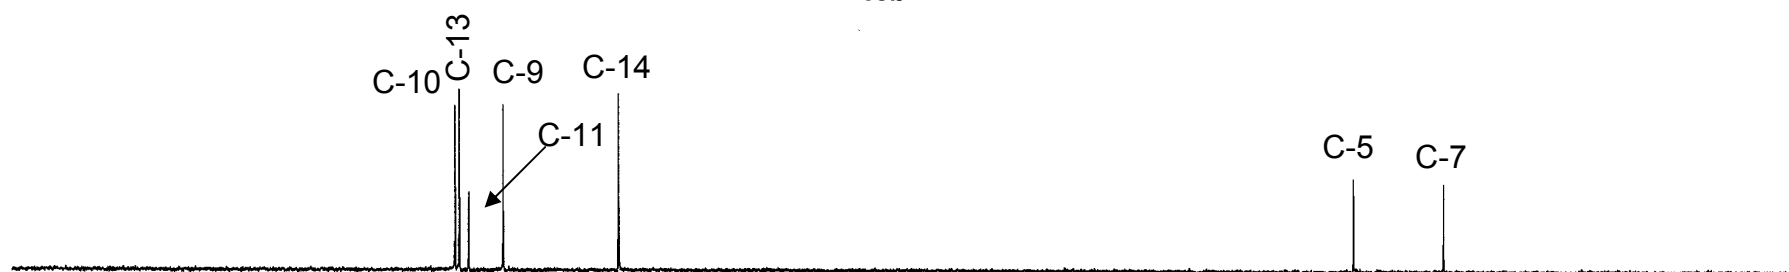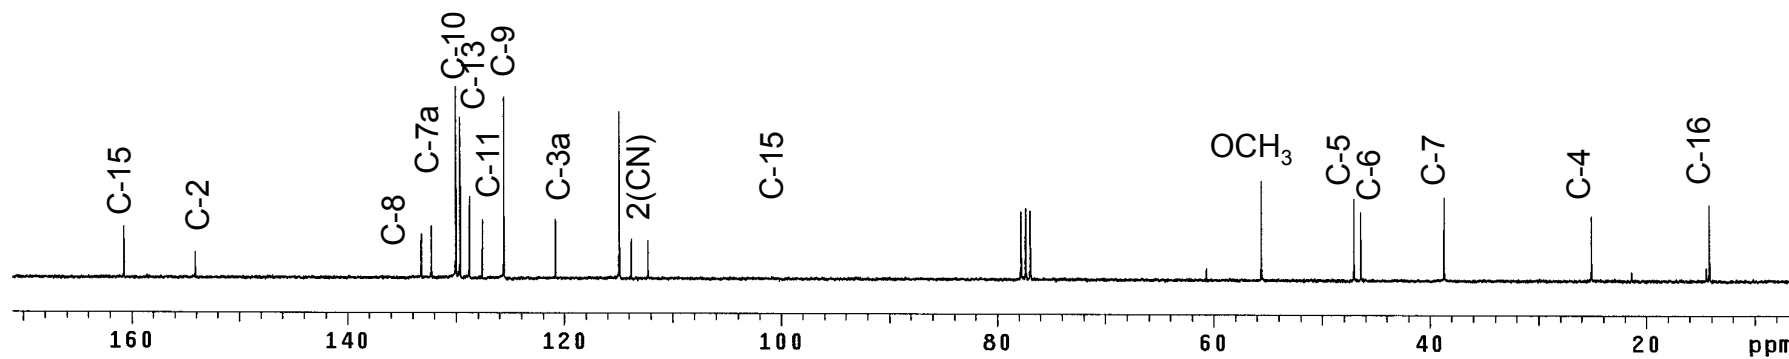

DEPT (CDCl<sub>3</sub>) 15b

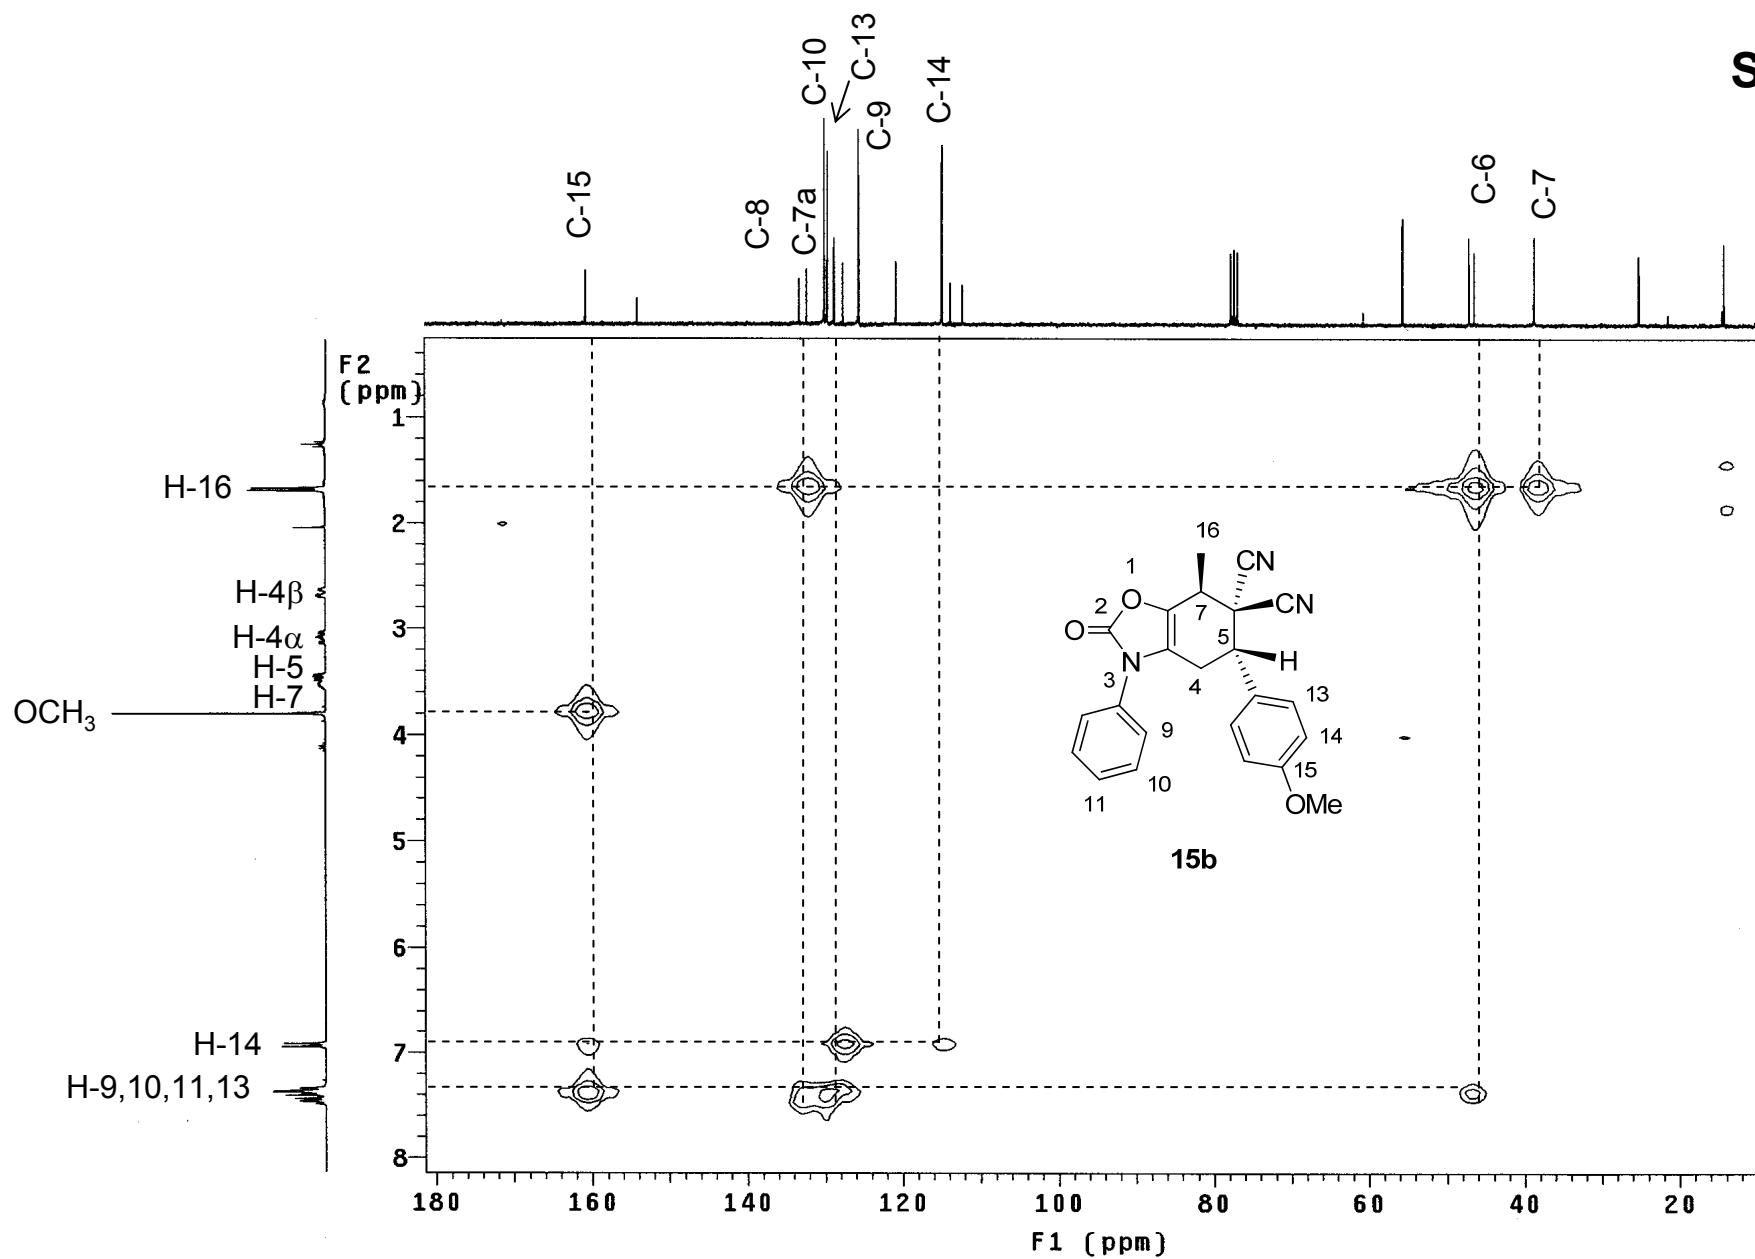HMBC experiment ( $\text{CDCl}_3$ ) **15b**

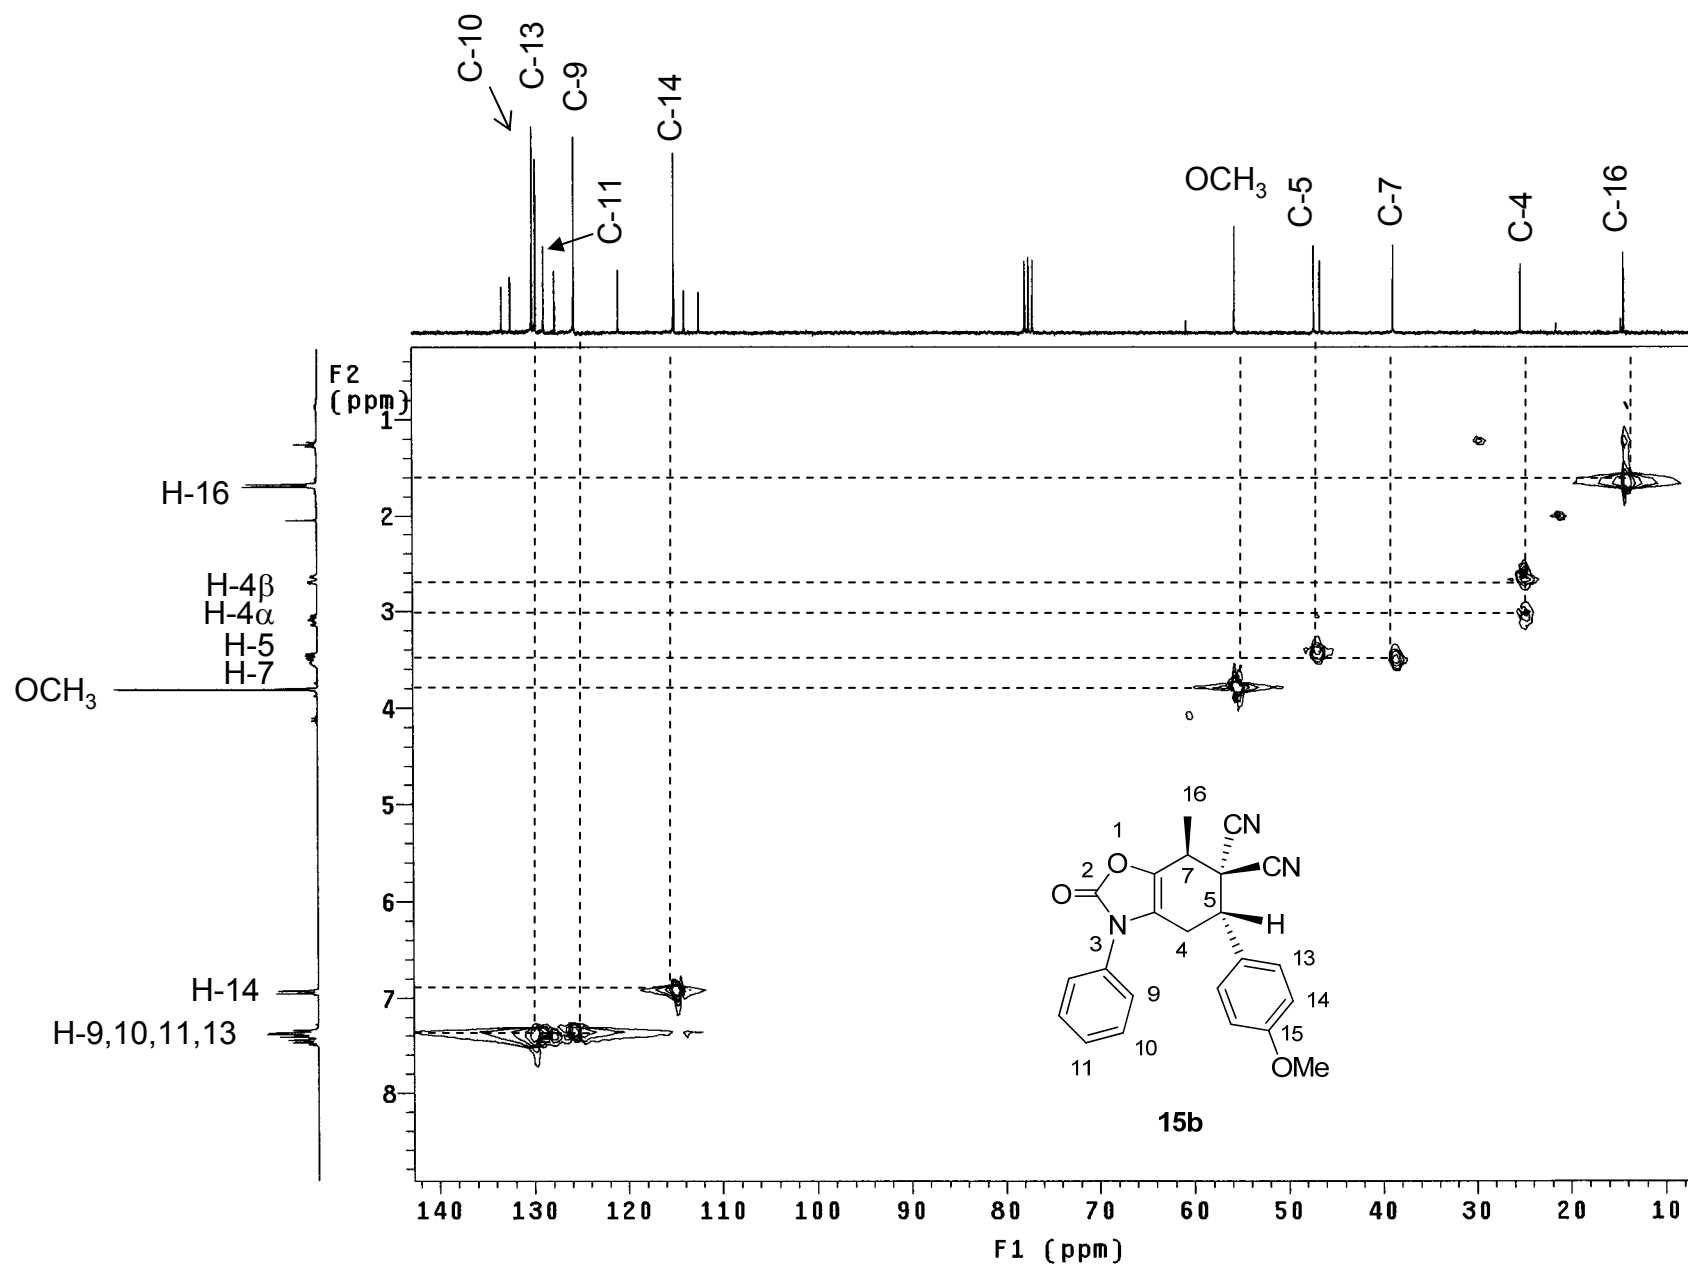

S116

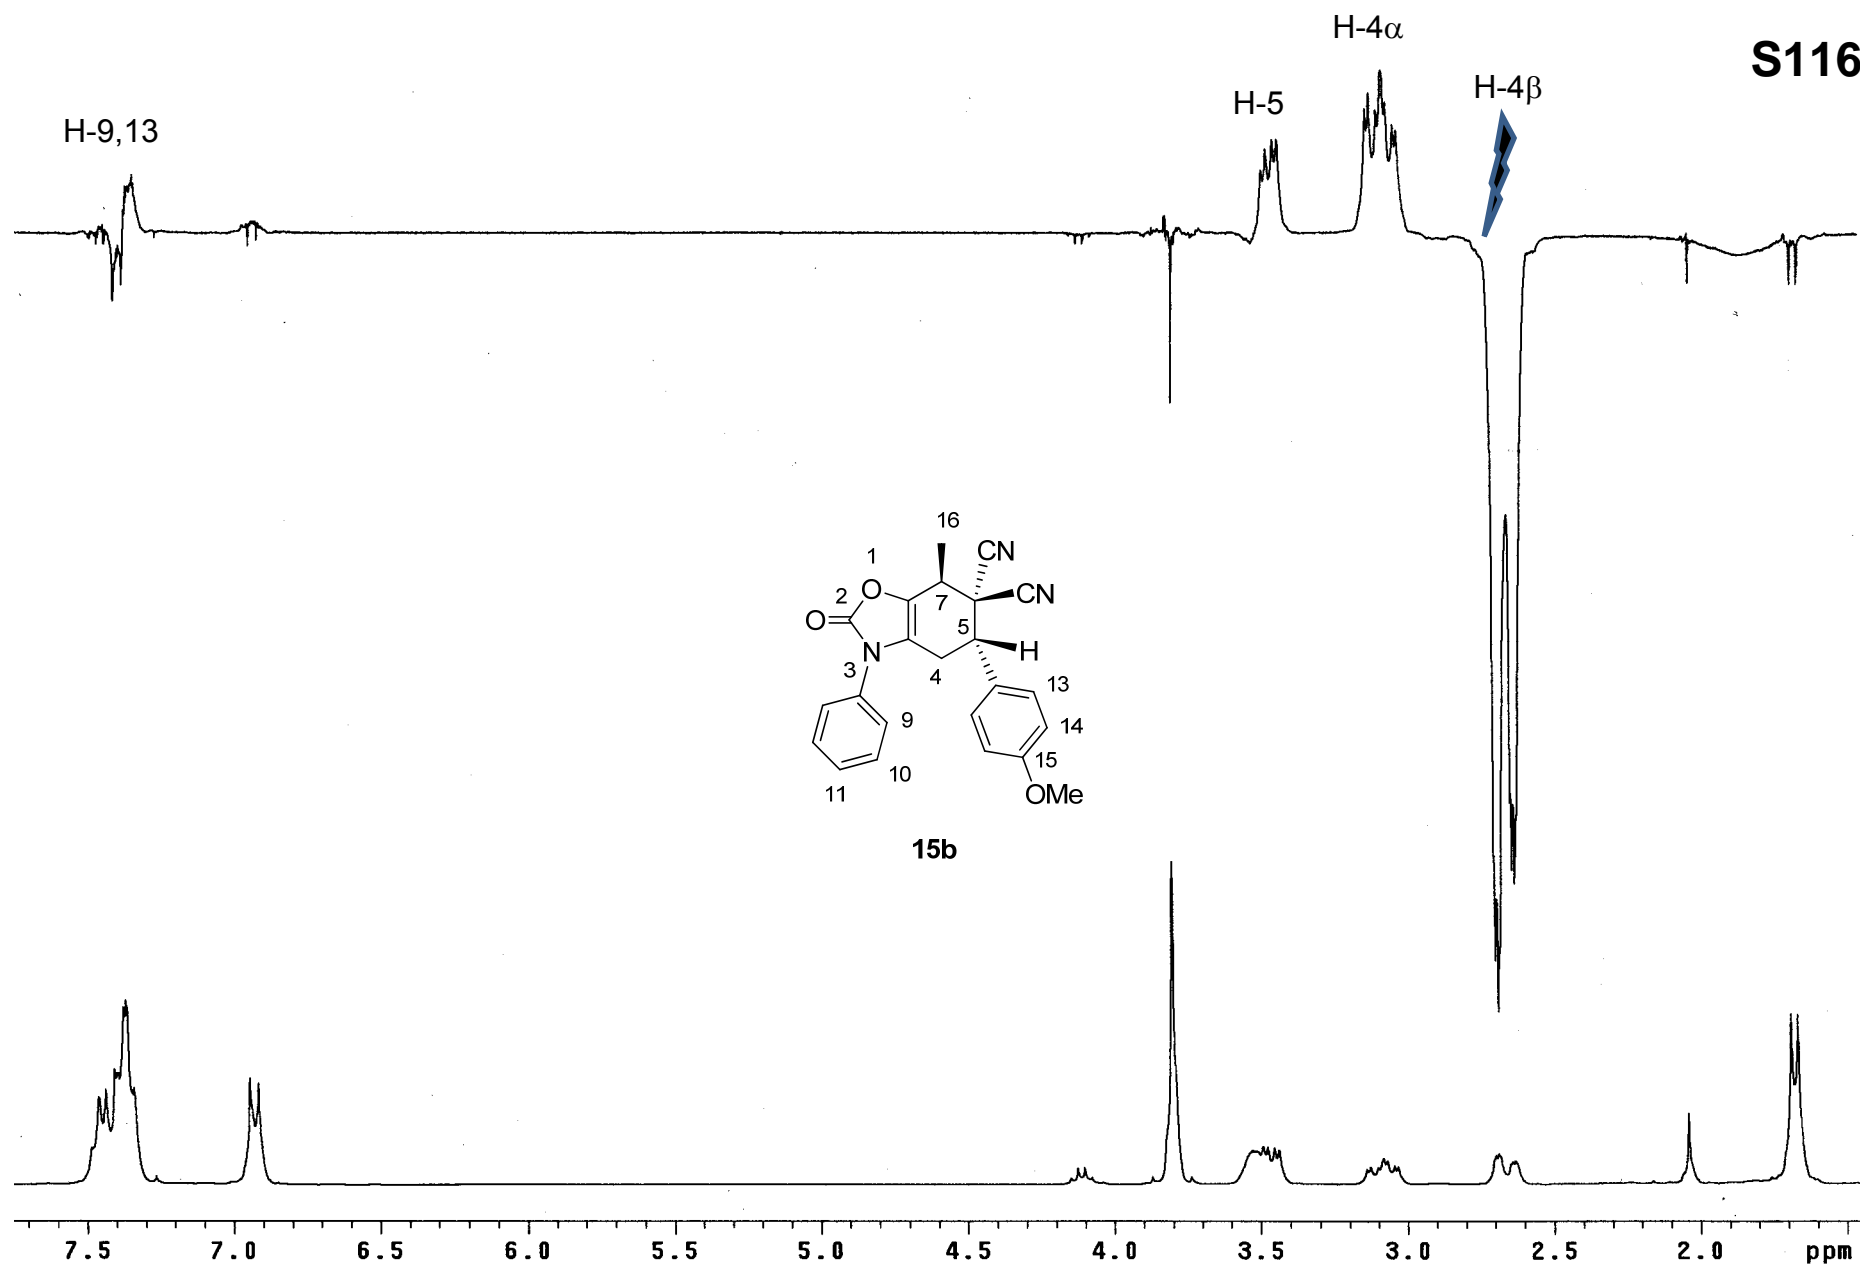

NOE experiment (CDCl<sub>3</sub>) 15b

S117

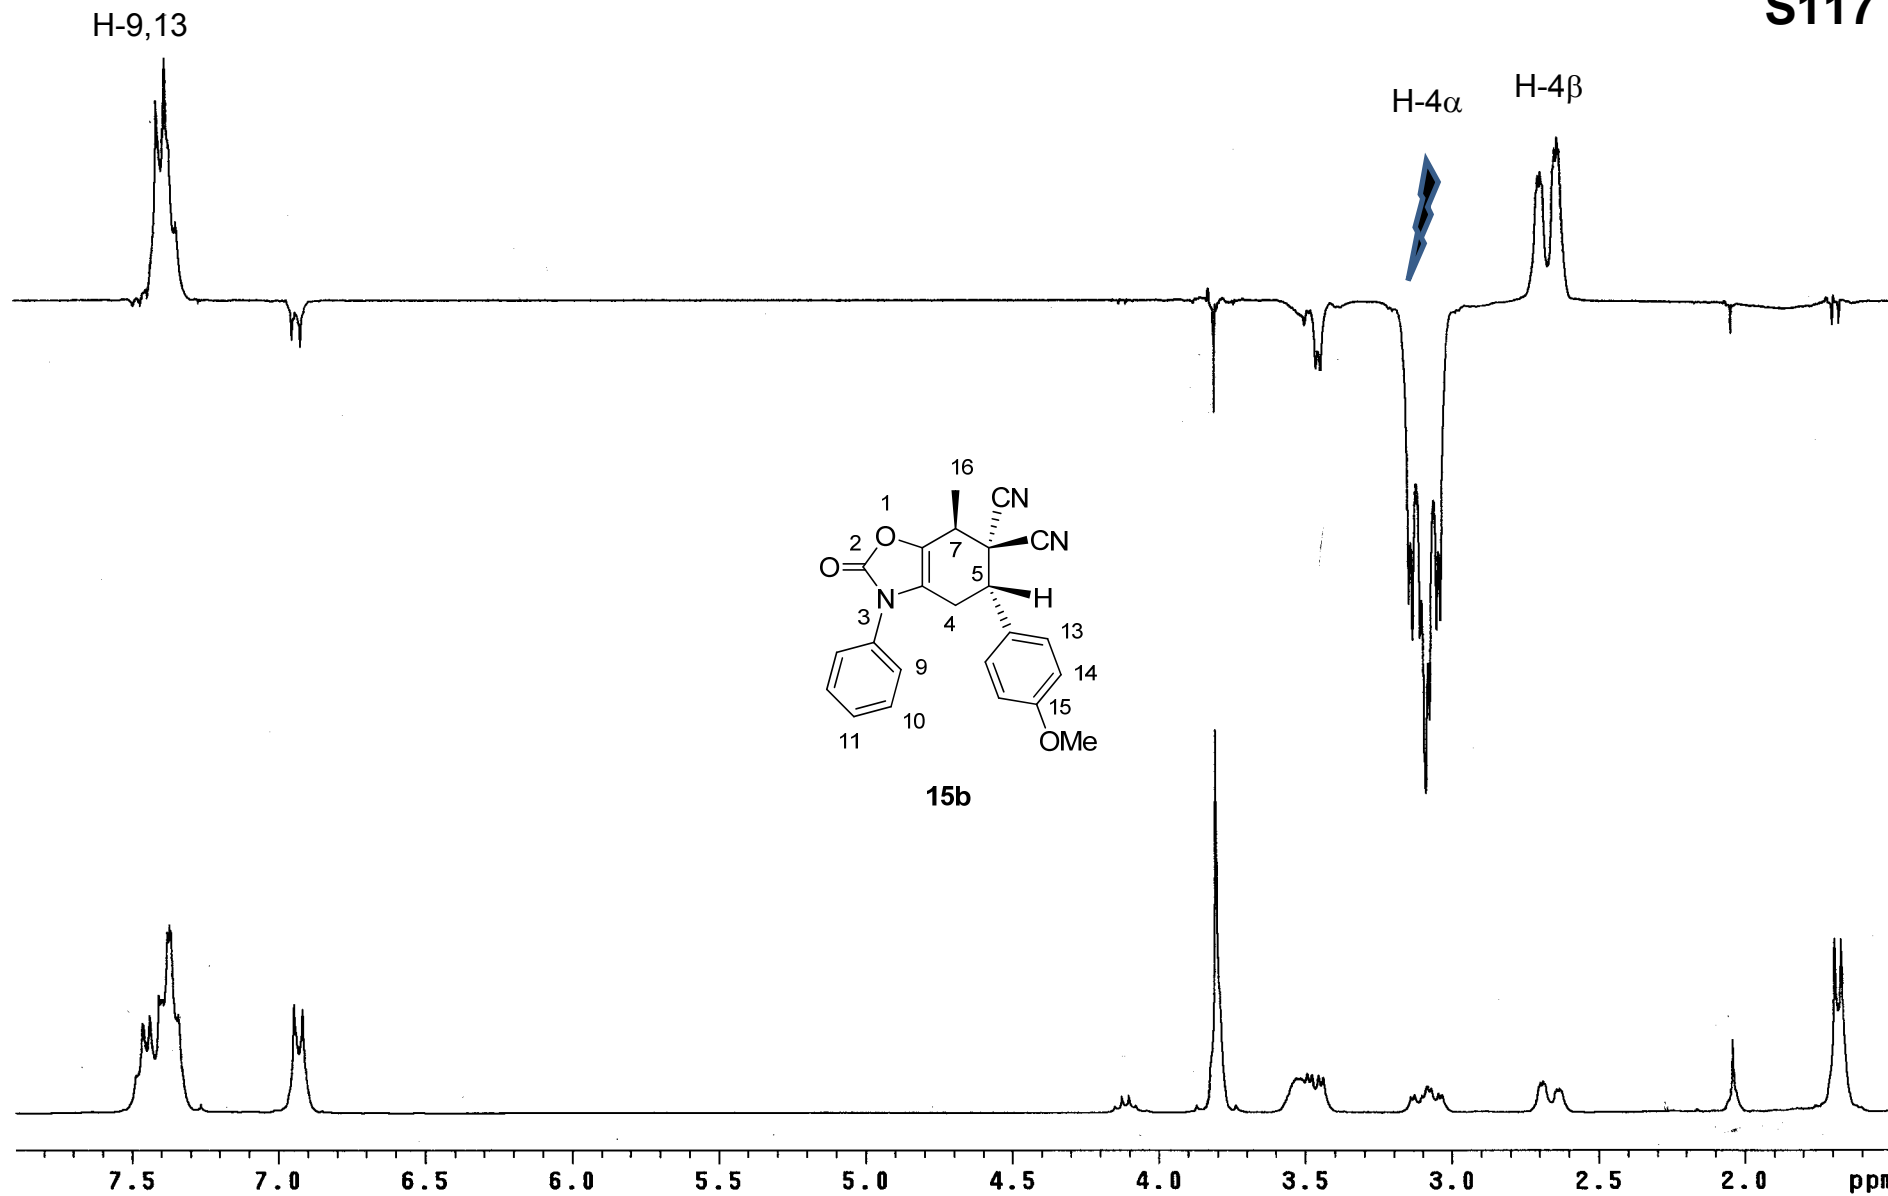

NOE experiment (CDCl<sub>3</sub>) 15b

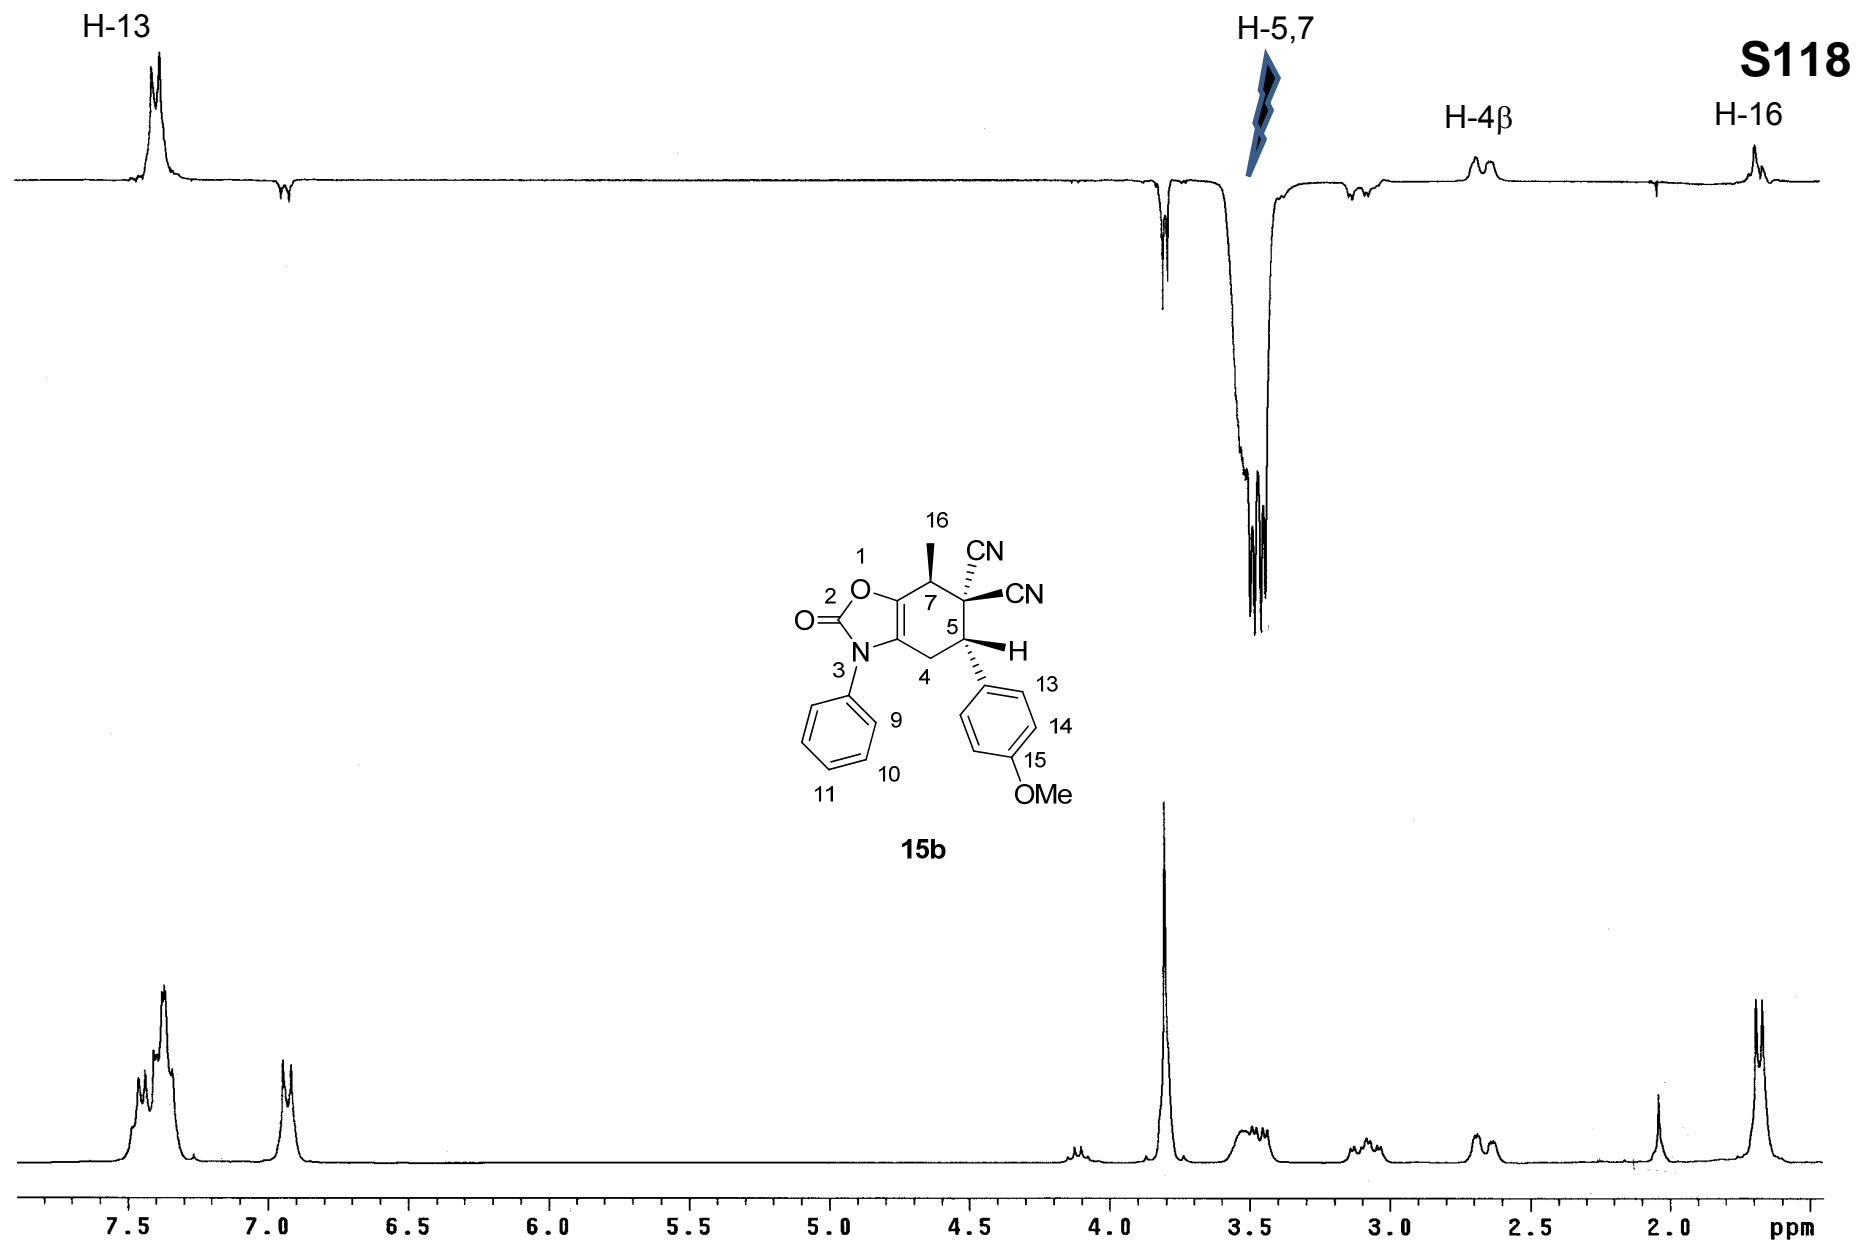

NOE experiment ( $\text{CDCl}_3$ ) **15b**

S119

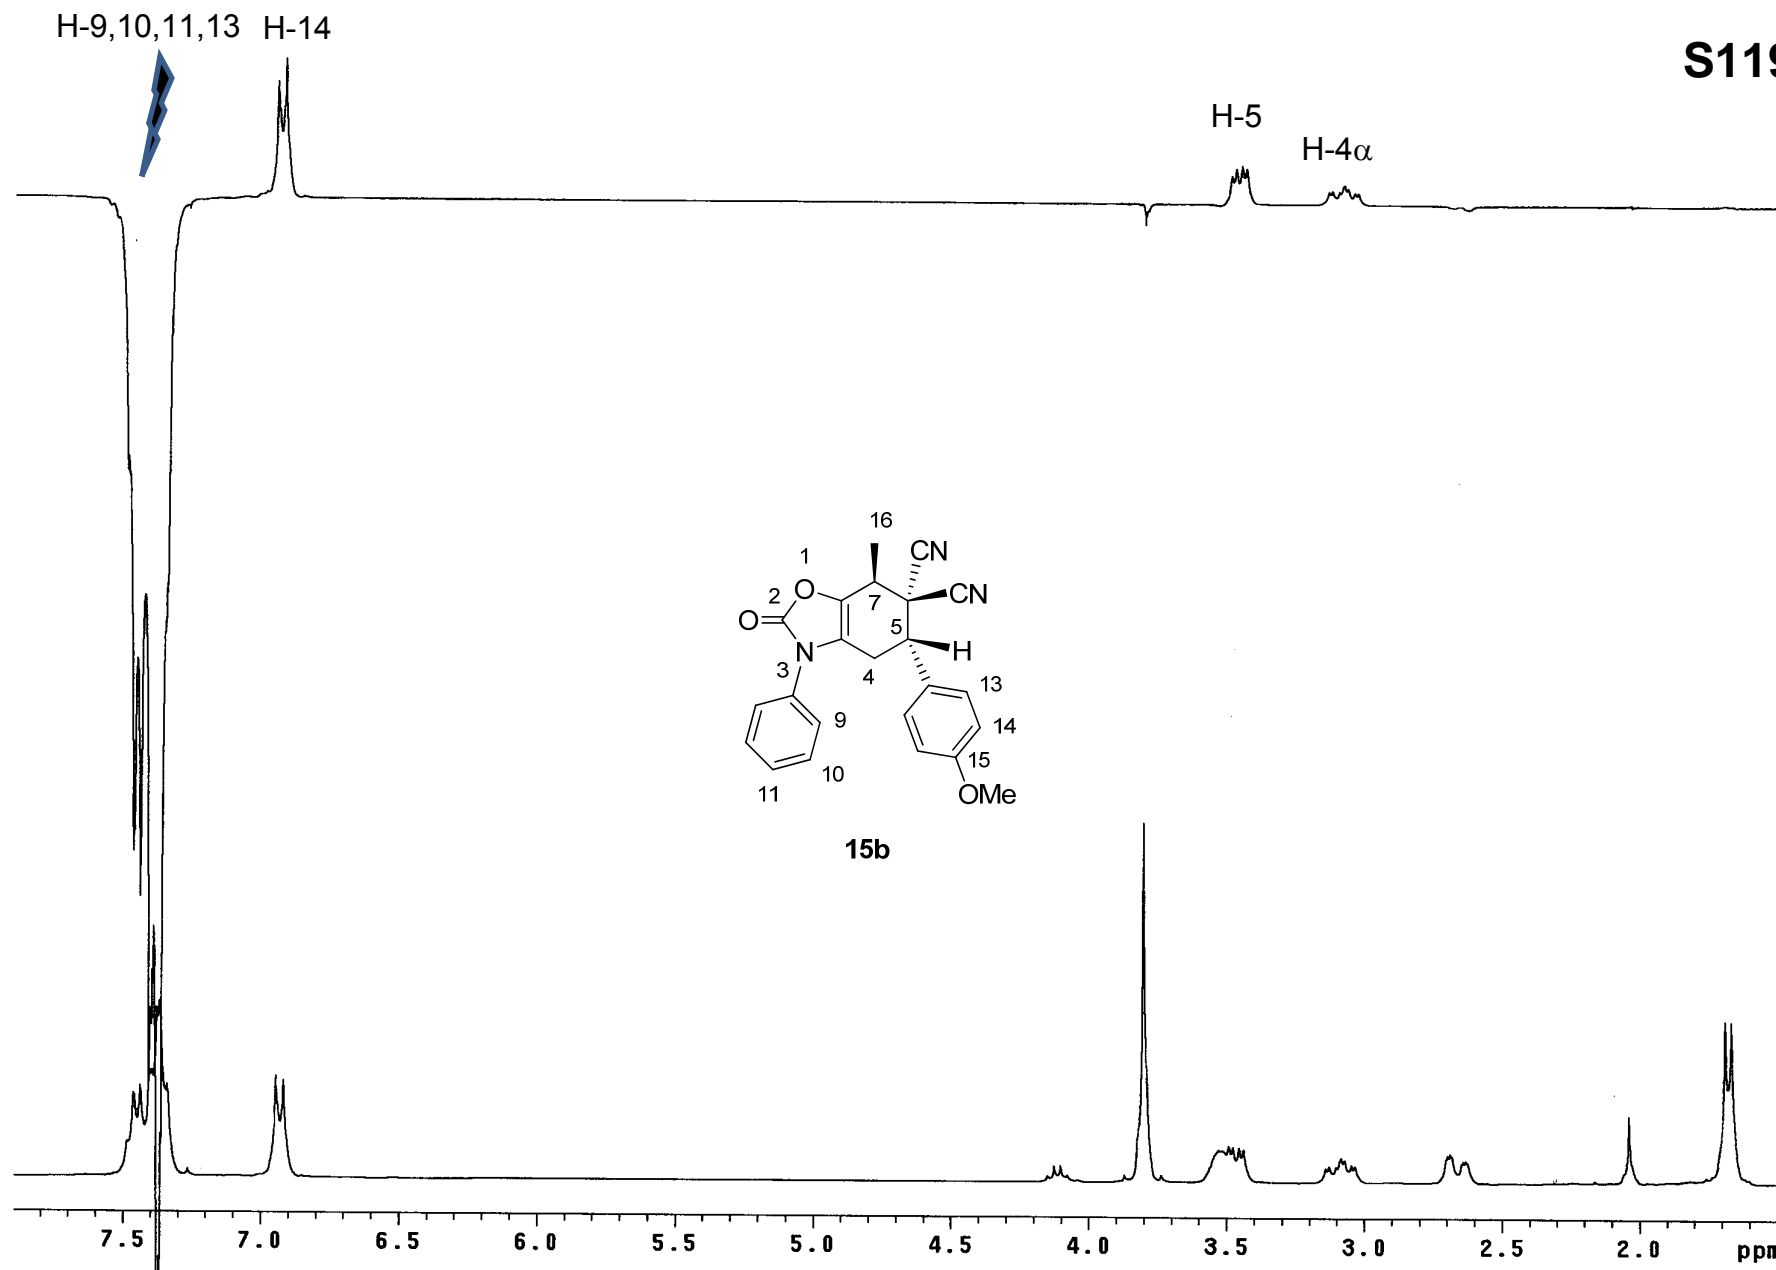

NOE experiment (CDCl<sub>3</sub>) **15b**



S120

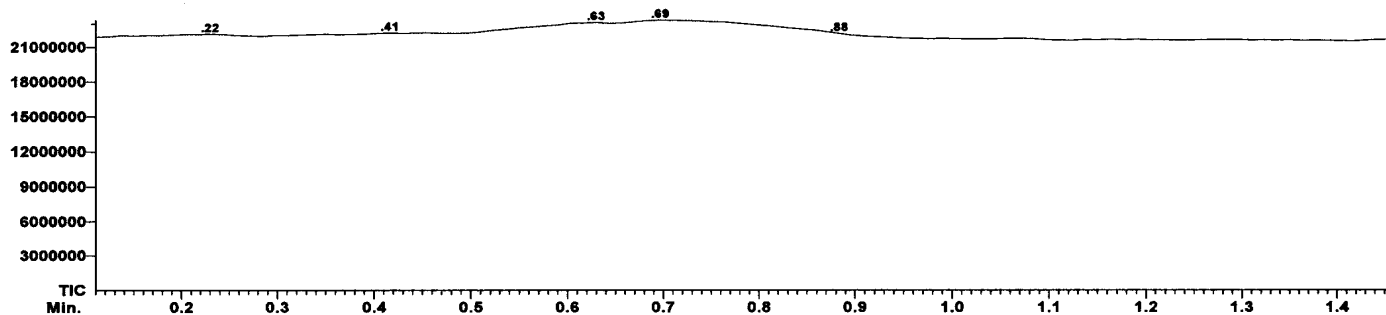

Scan: 60-67

R.T.: .85

Base: m/z 385; 2.5%FS TIC: 1193206

#Ions: 2942

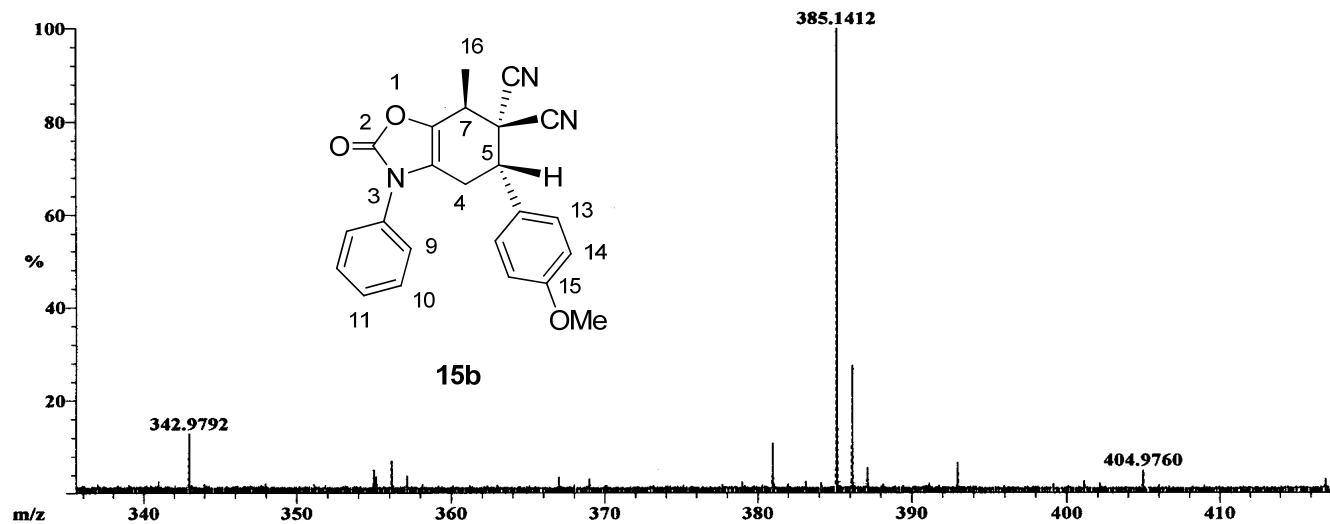

Selected Isotopes : H<sub>0-25</sub> C<sub>0-25</sub> N<sub>0-5</sub> O<sub>0-3</sub>

Error Limit : 5 mmu

| <u>Measured Mass</u> | <u>% Base</u> | <u>Formula</u>                                                | <u>Calculated Mass</u> | <u>Error</u> |
|----------------------|---------------|---------------------------------------------------------------|------------------------|--------------|
| 385.14116            | 100.0%        | C <sub>23</sub> H <sub>19</sub> N <sub>3</sub> O <sub>3</sub> | 385.14265              | -1.5         |

HRMS 15b

H-9,10,11,13,14

H-16

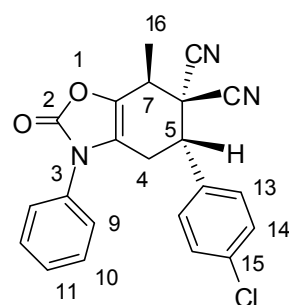**15c**H-4 $\beta$ 

H-5

H-7

H-4 $\alpha$ 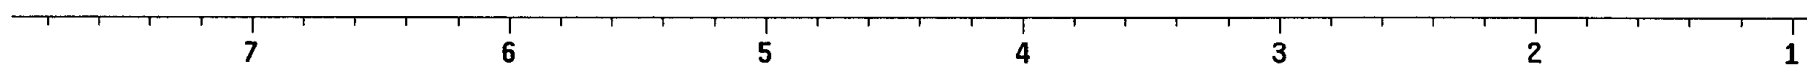 $^1\text{H}$  NMR ( $\text{CDCl}_3$ ) **15c**

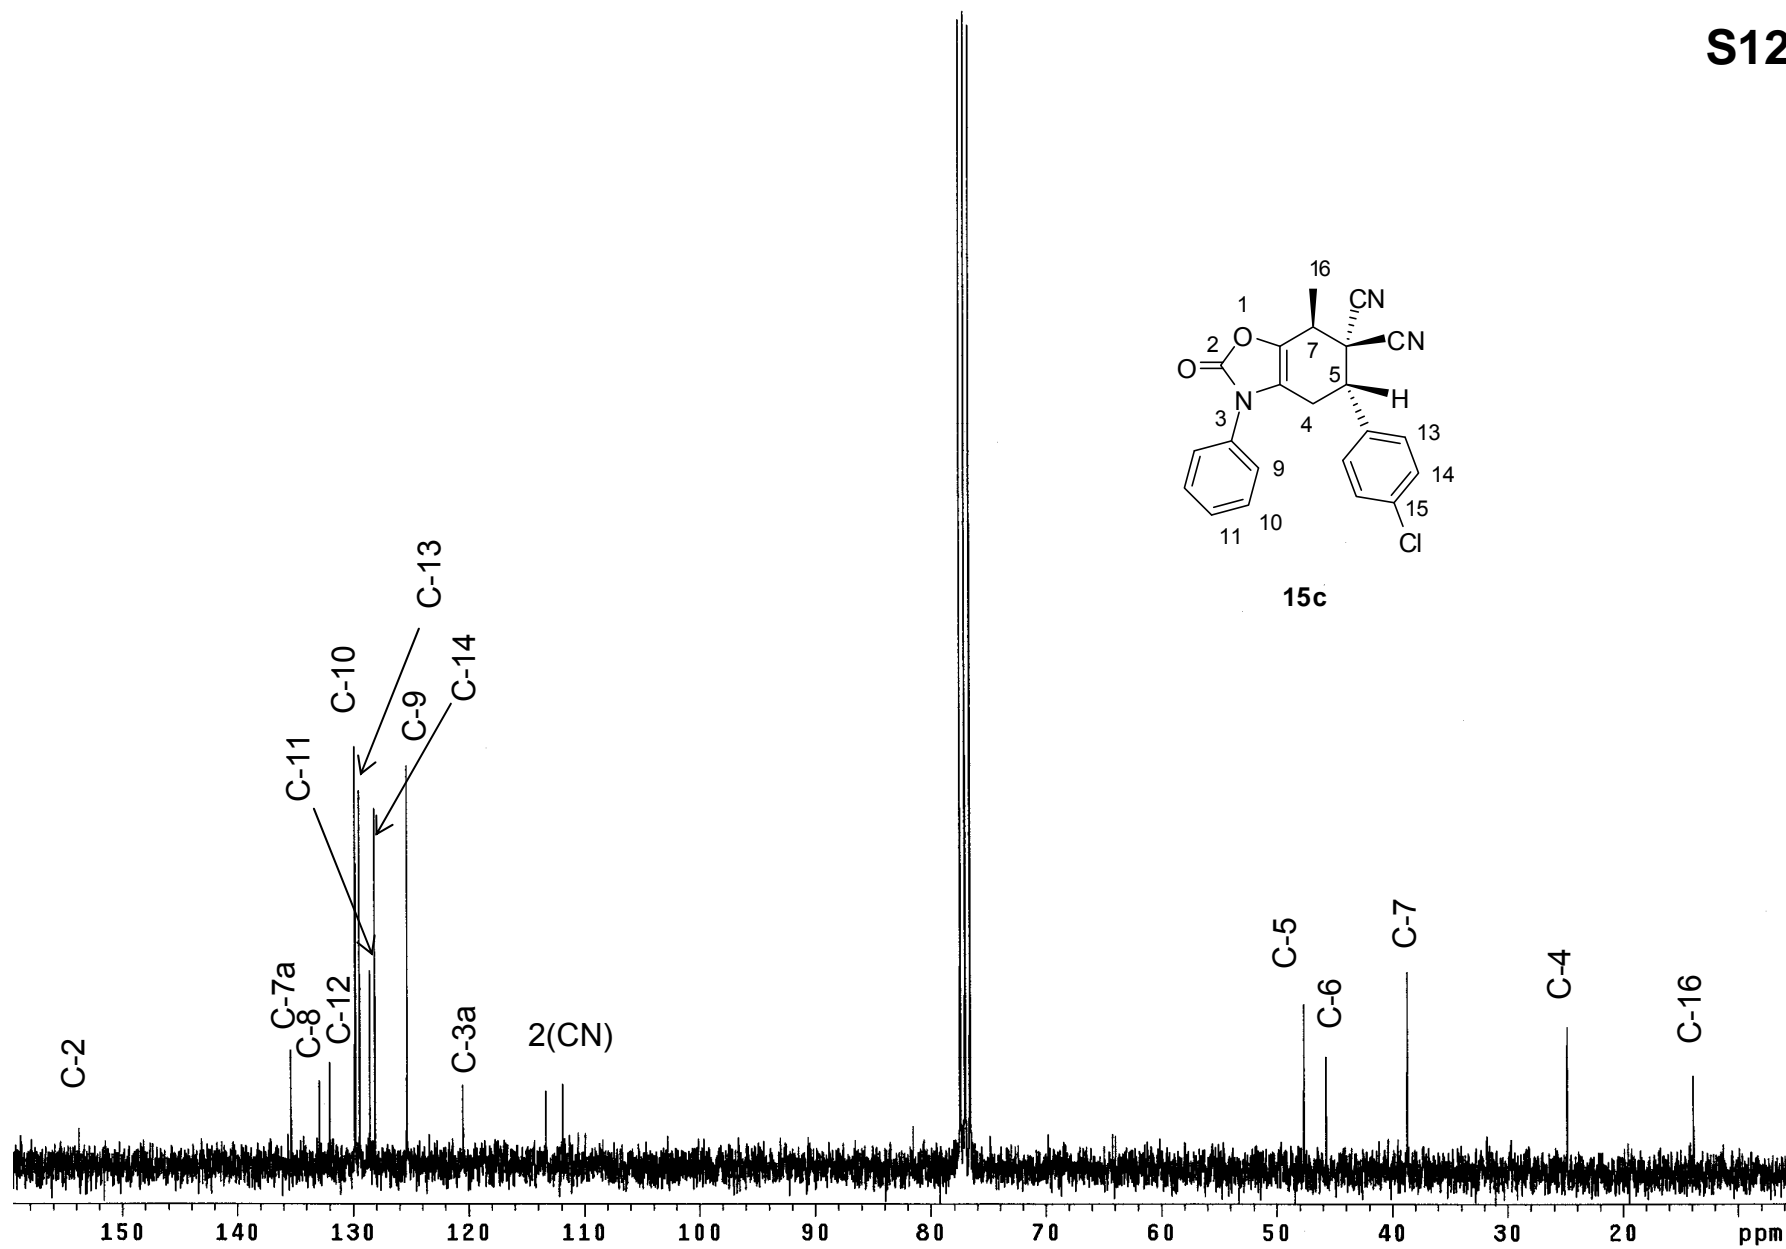

**<sup>13</sup>C NMR (CDCl<sub>3</sub>) 15c**

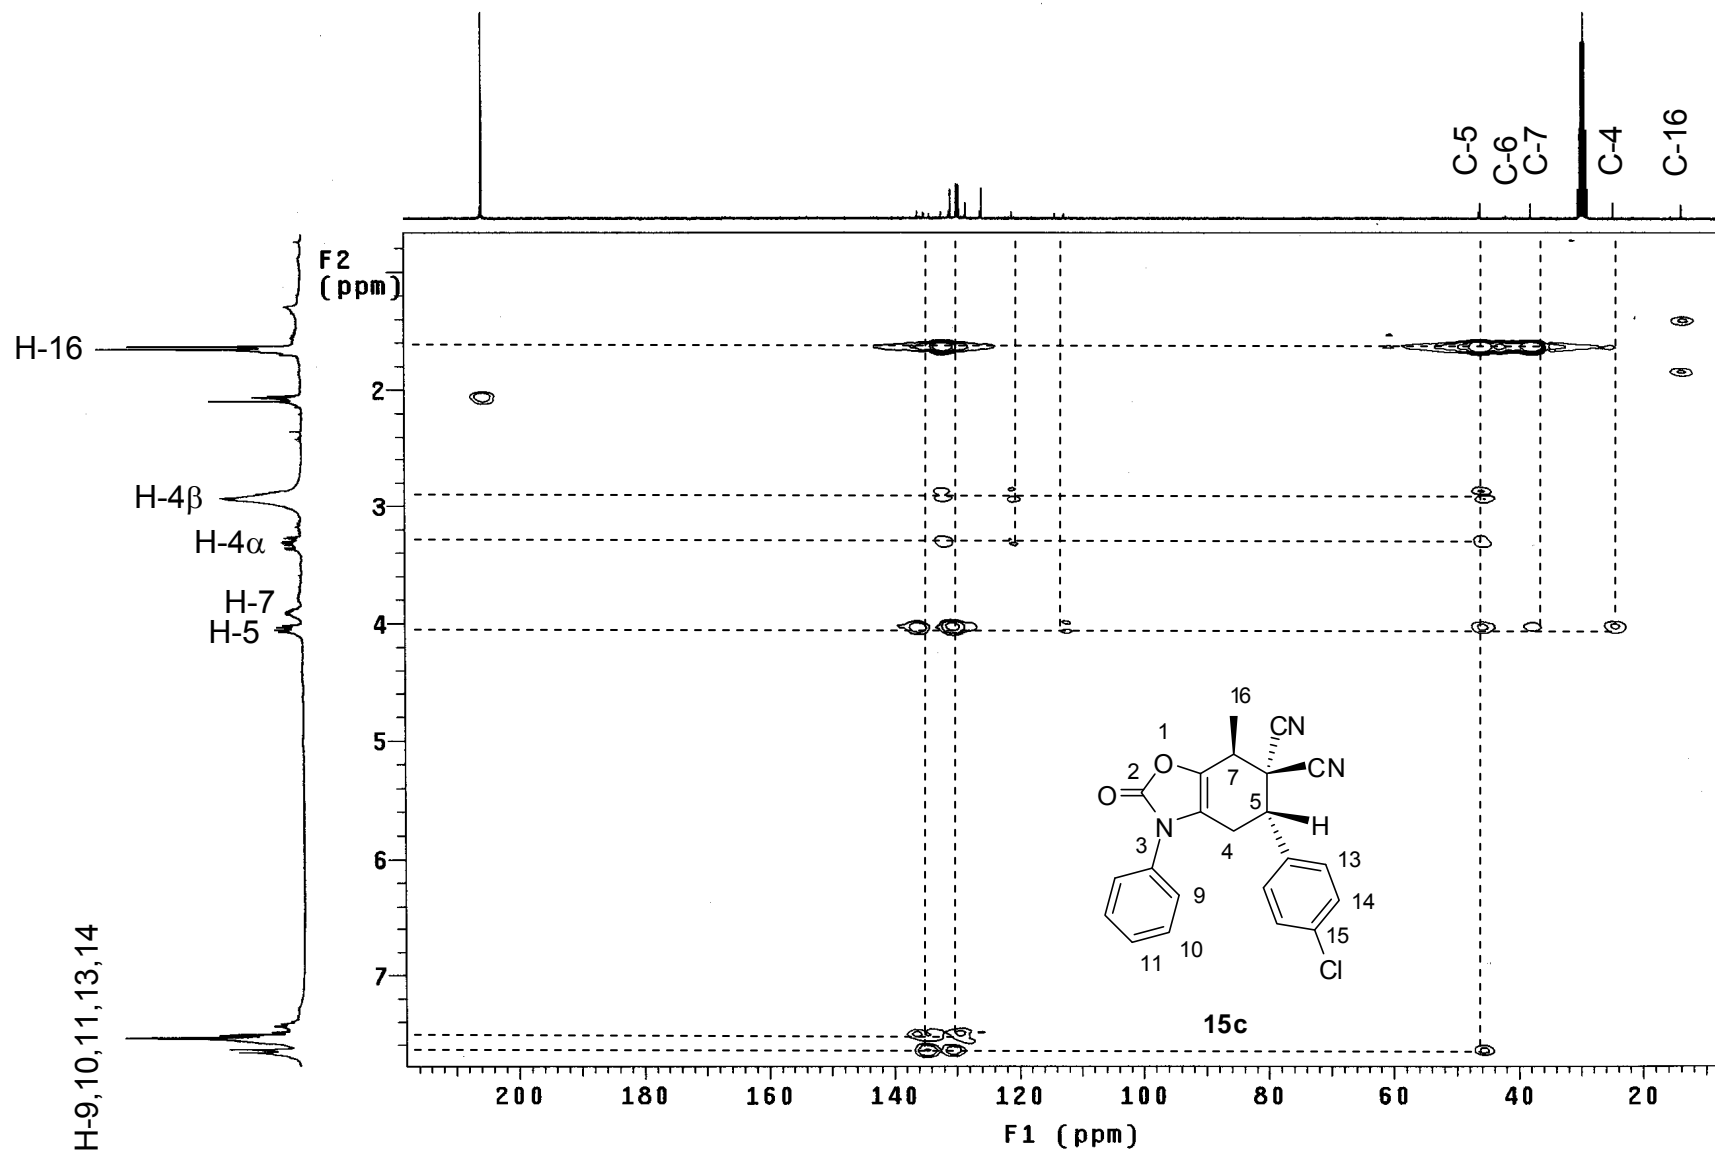

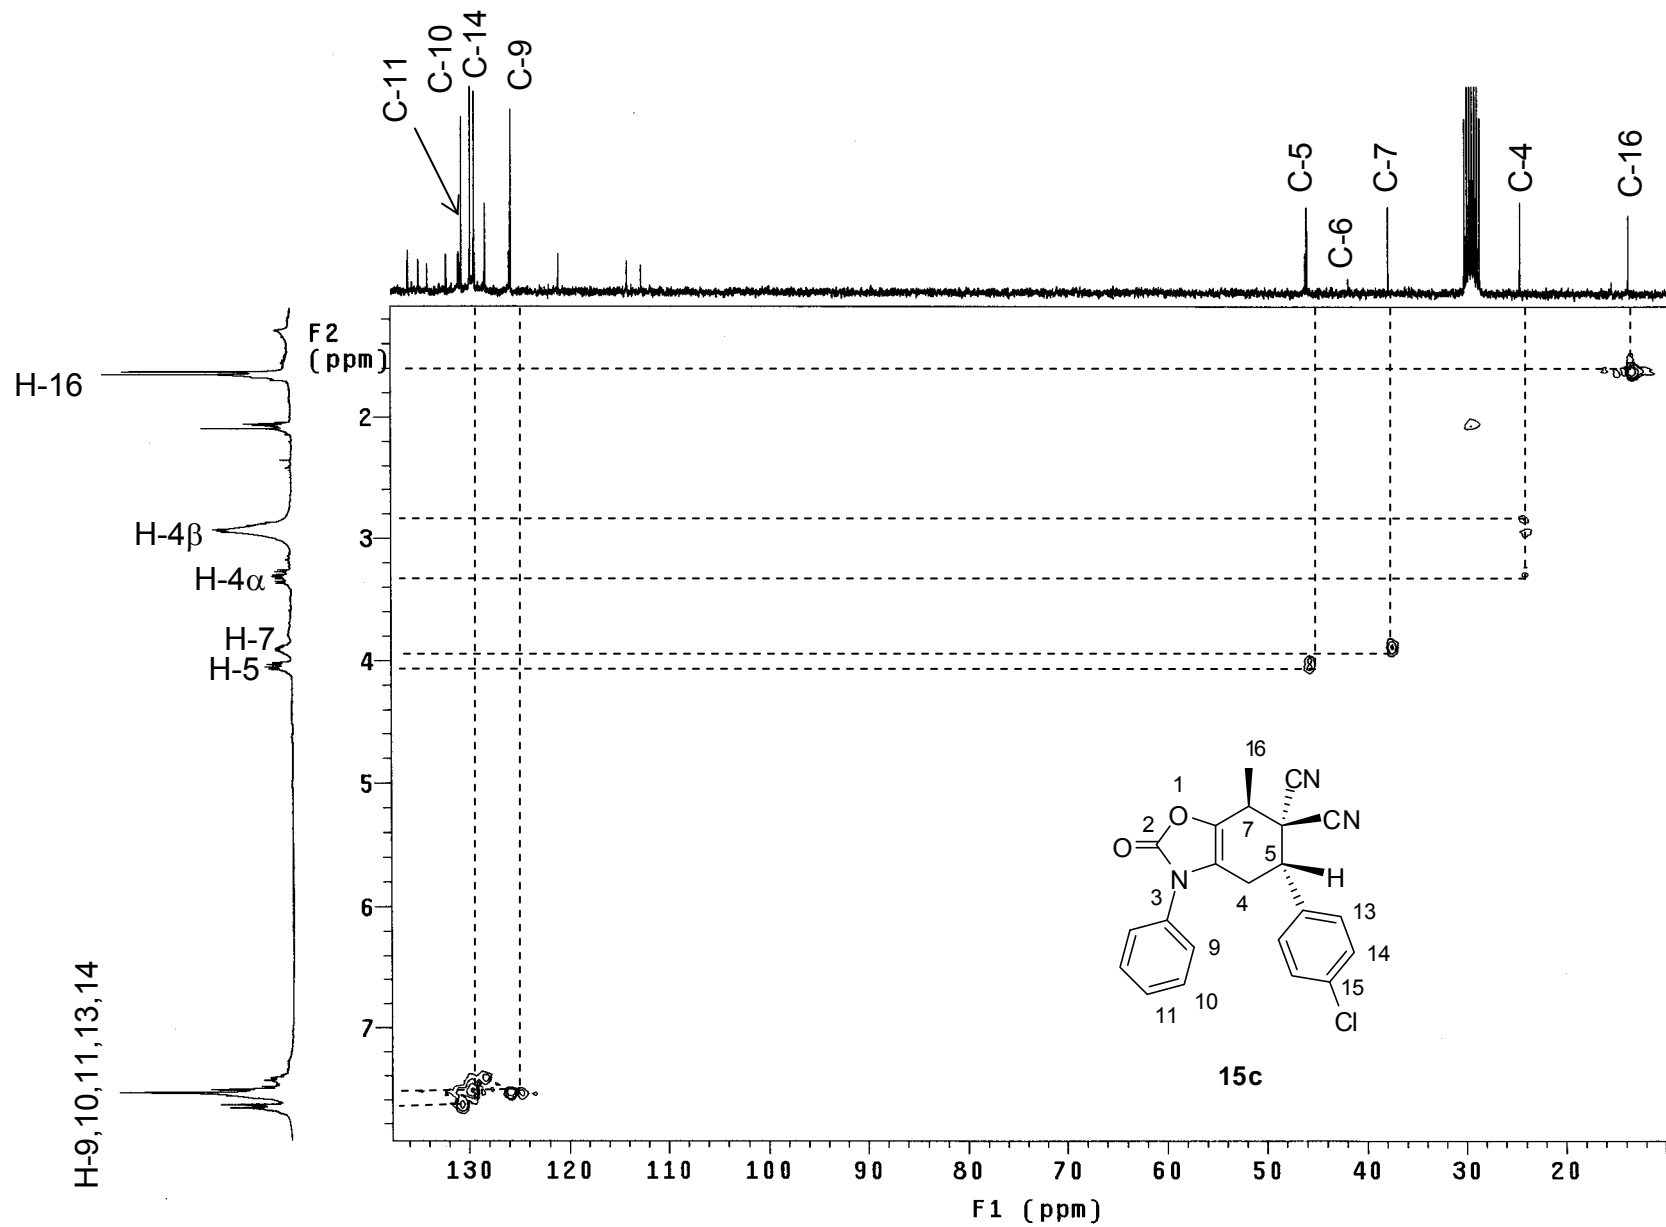

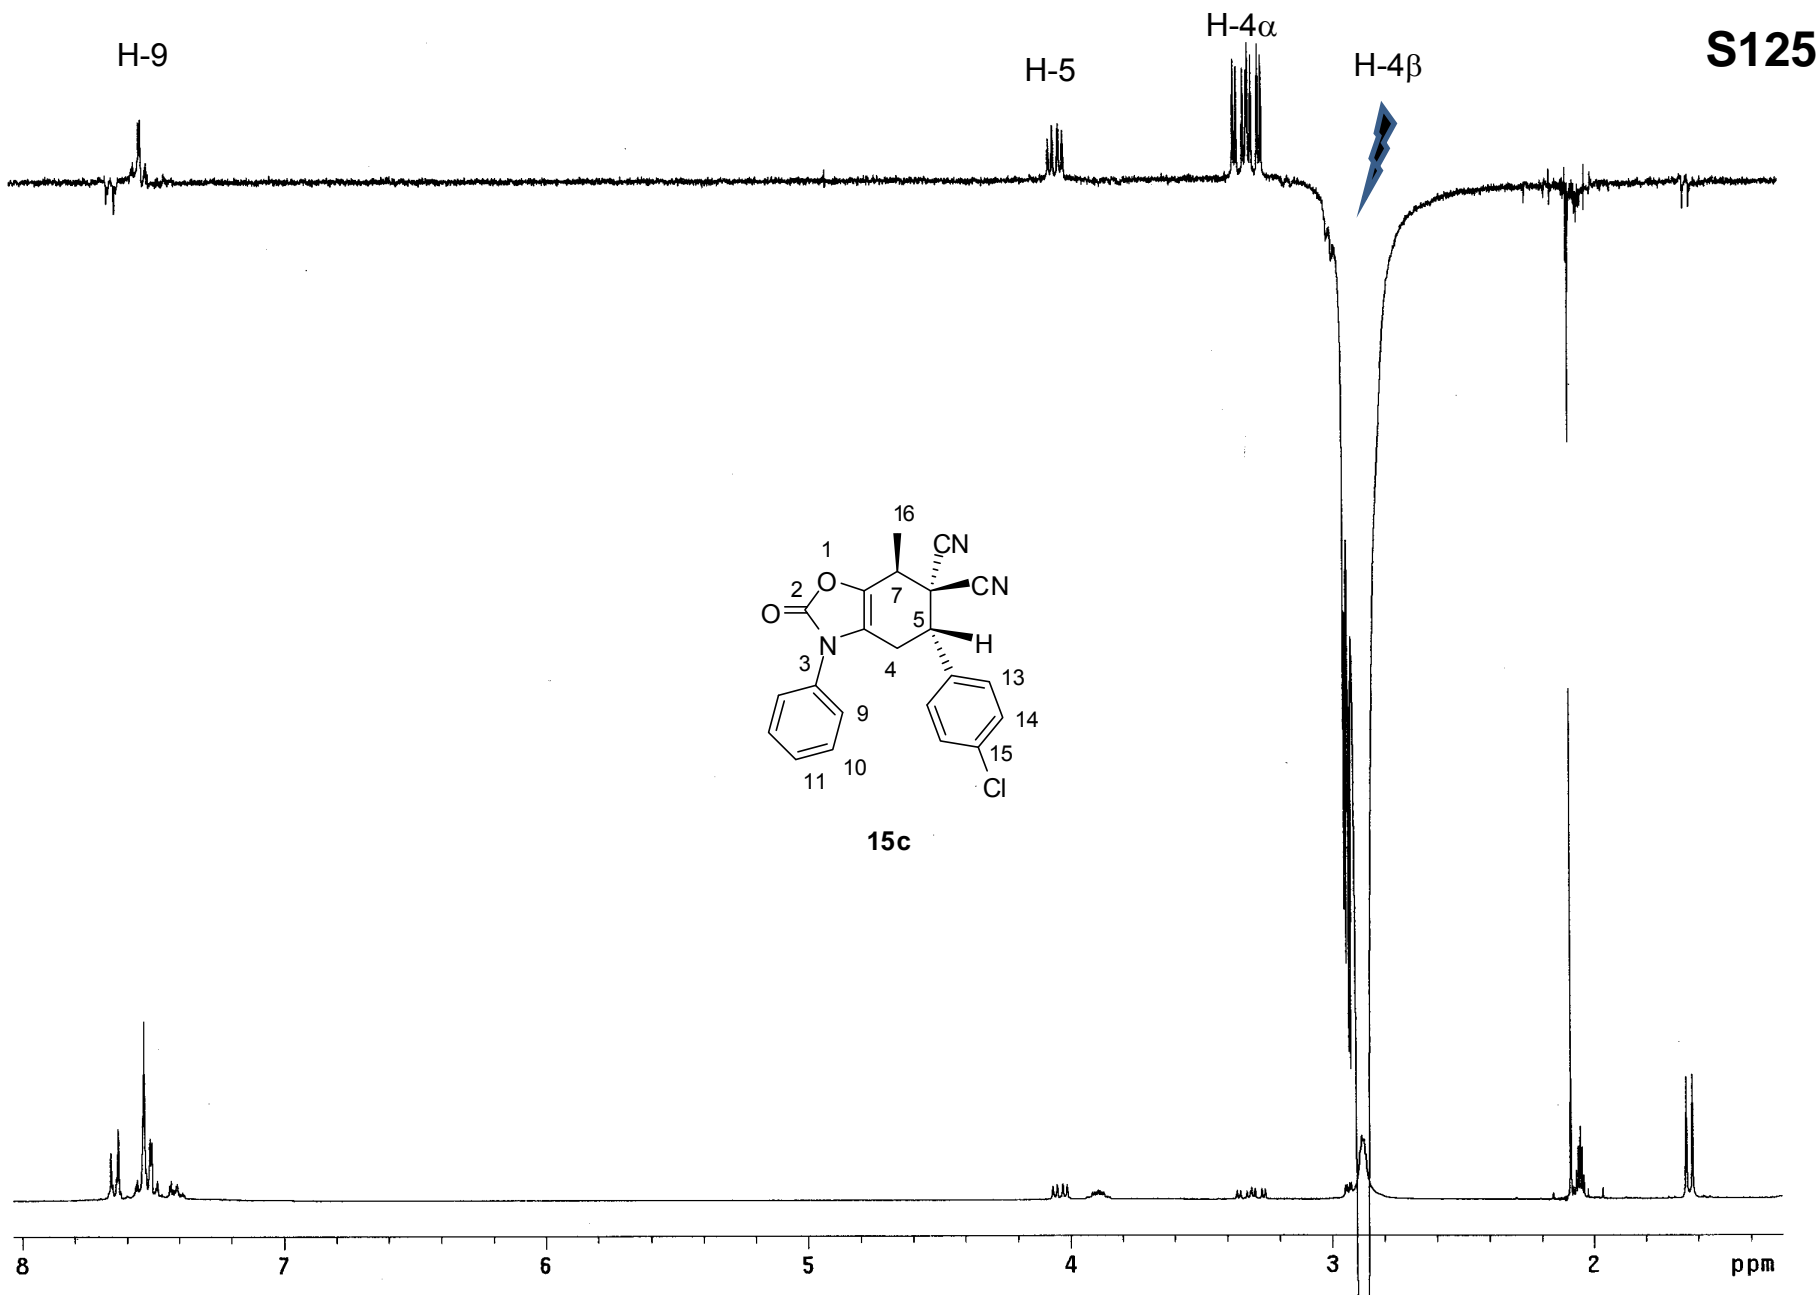

NOE experiment (CDCl<sub>3</sub>) 15c

H-9,10,11,13,14

S126

H-5

H-4 $\alpha$

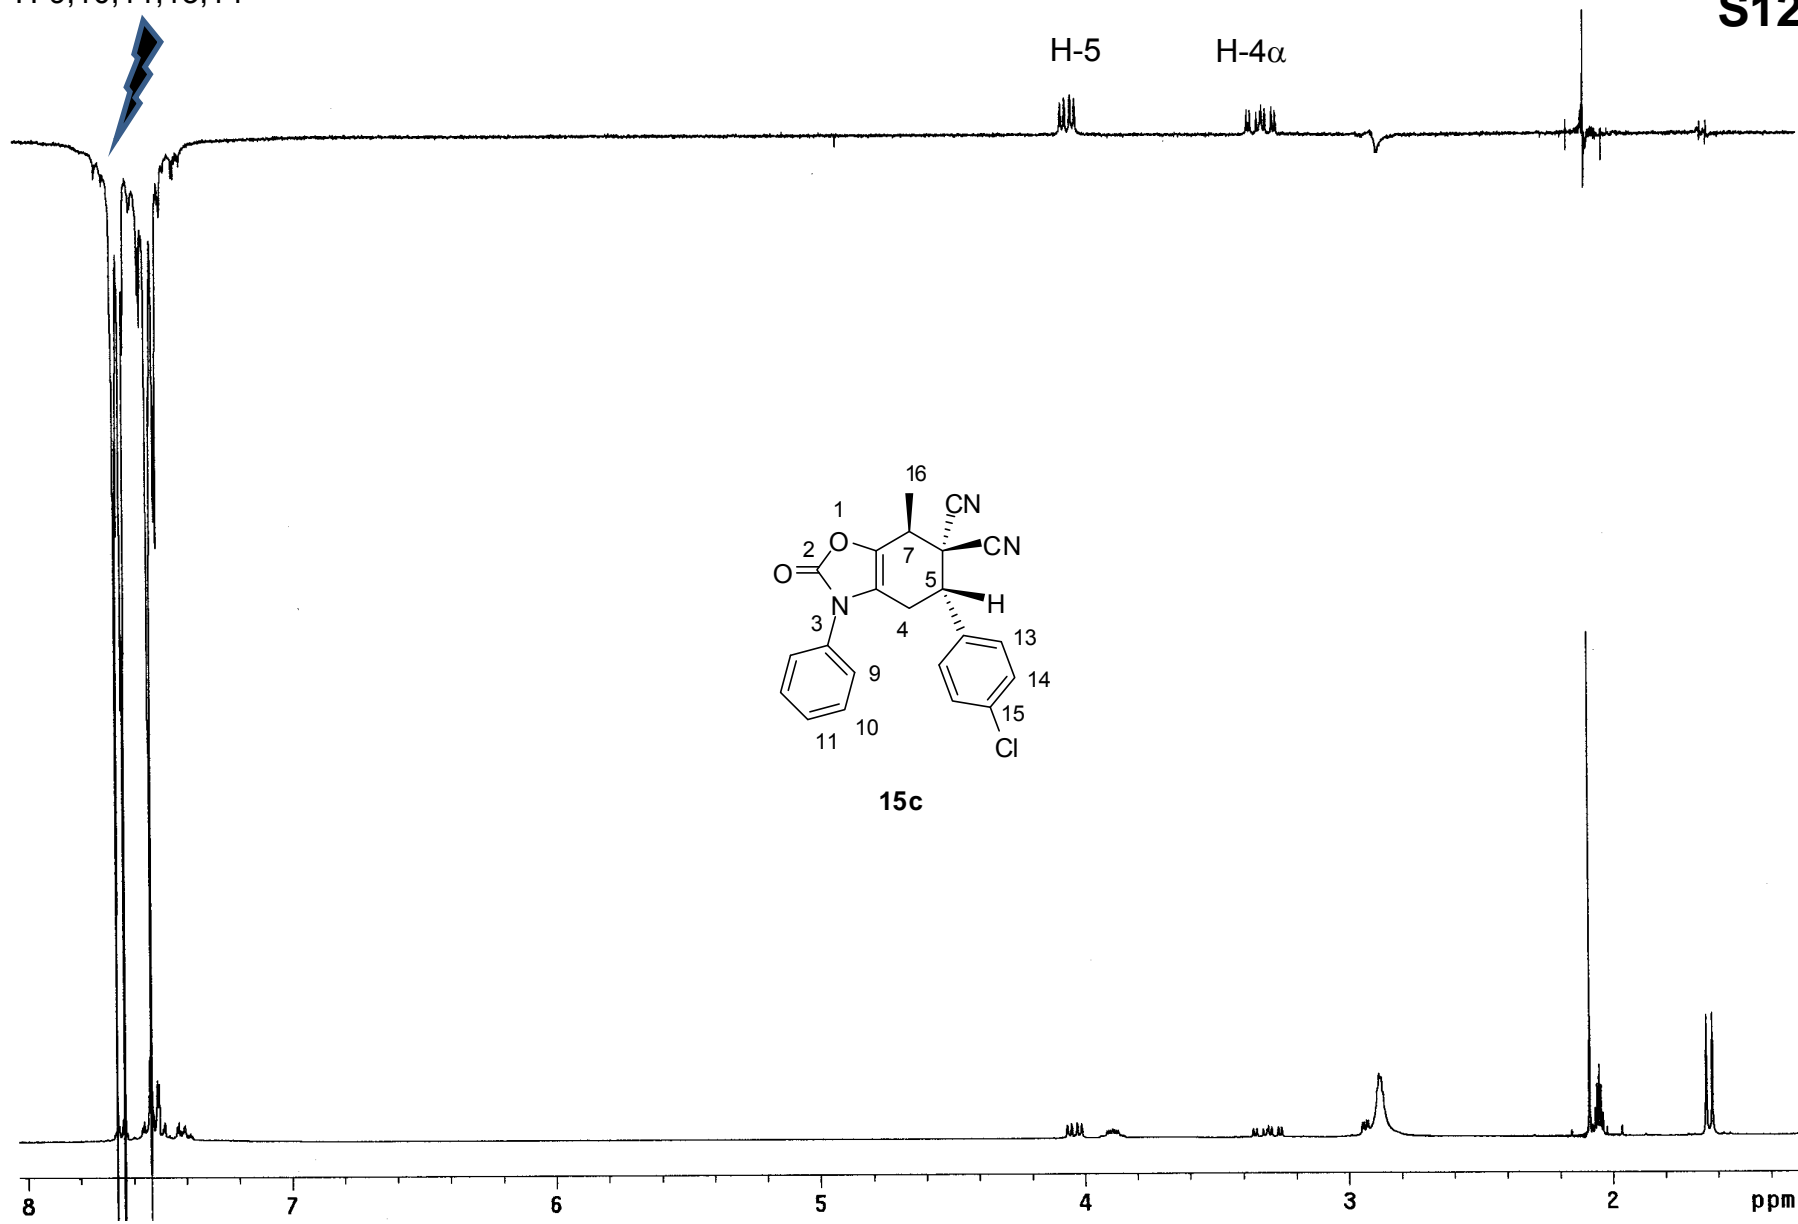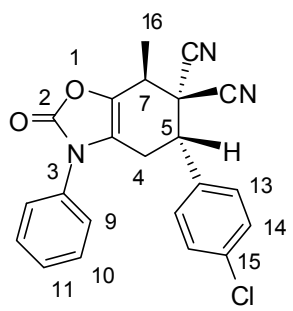

NOE experiment (CDCl<sub>3</sub>) 15c

S127

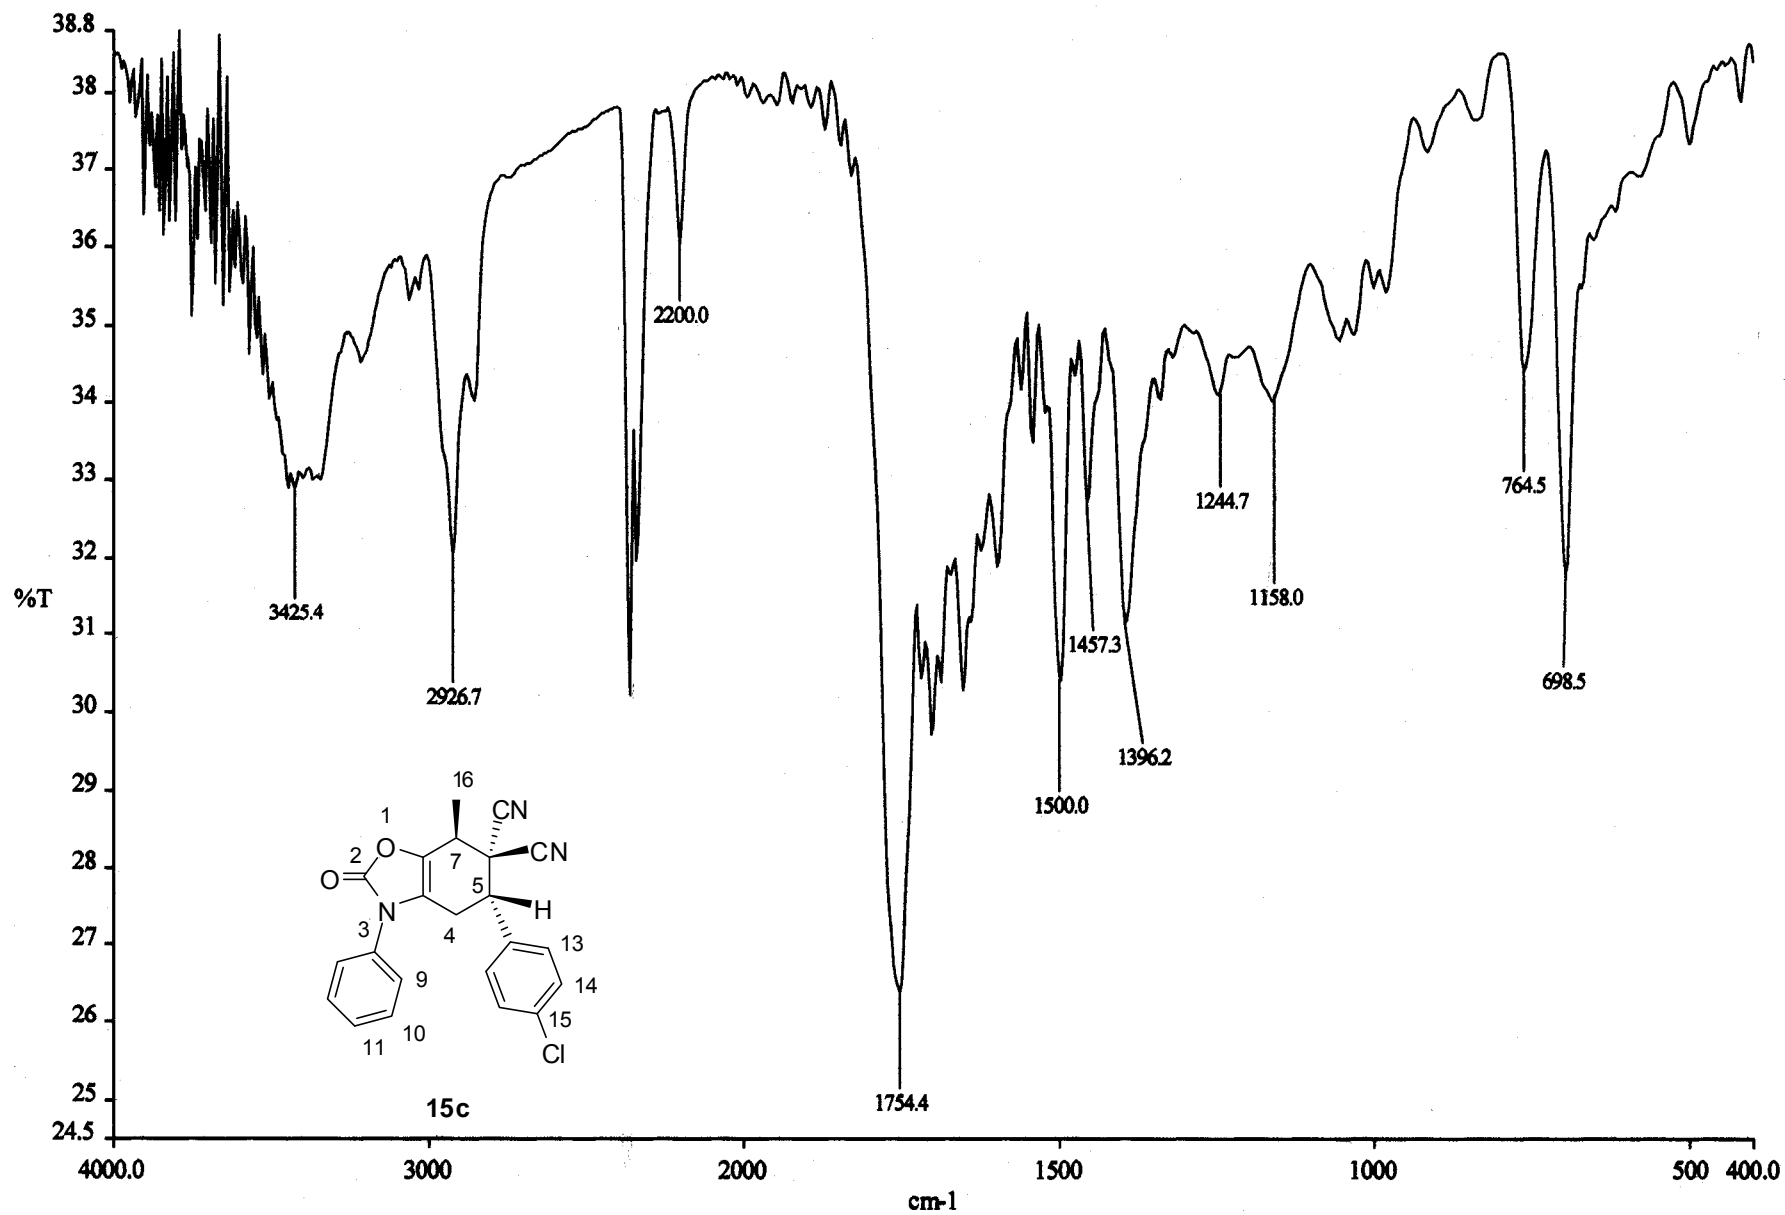

FT-IR (KBr) 15c



S128

H-16

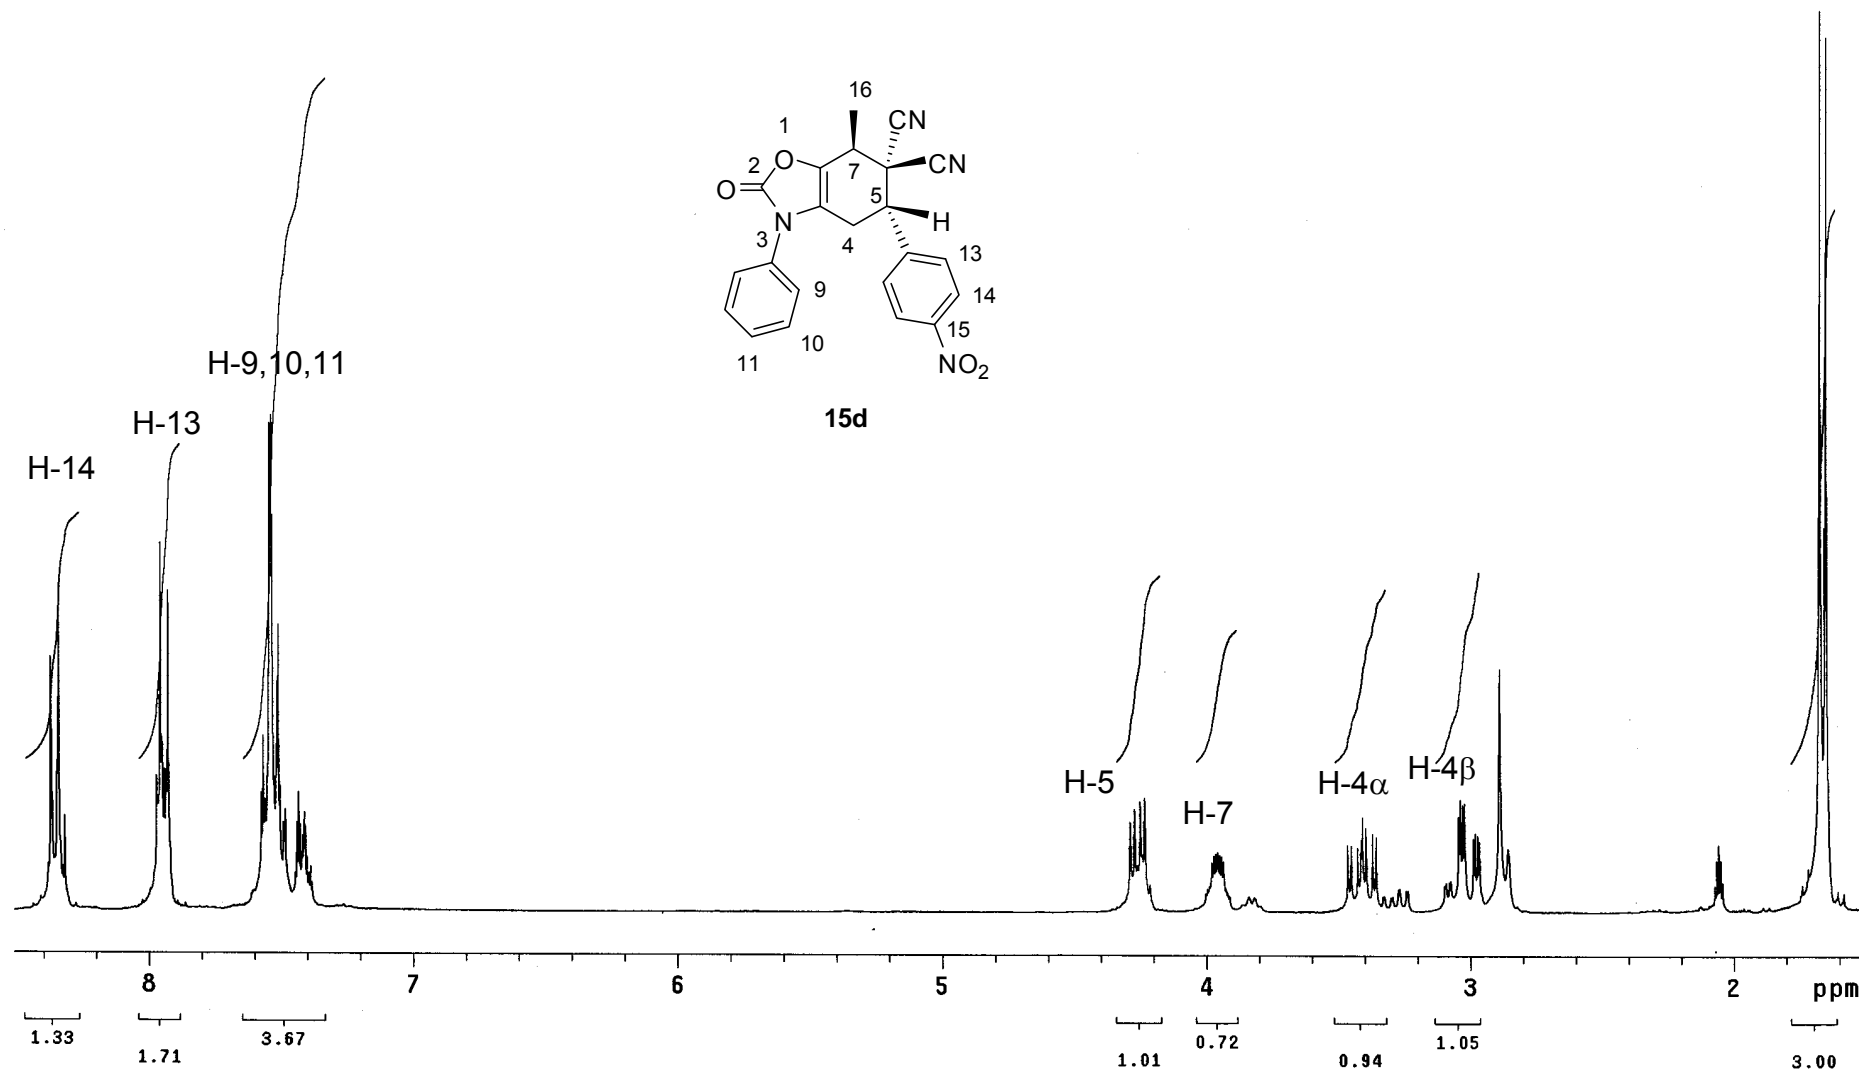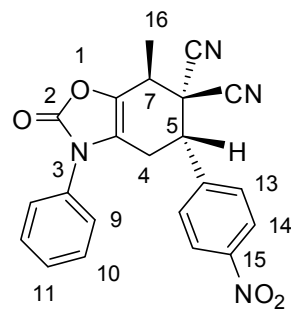

15d

<sup>1</sup>H NMR (CDCl<sub>3</sub>) 15d

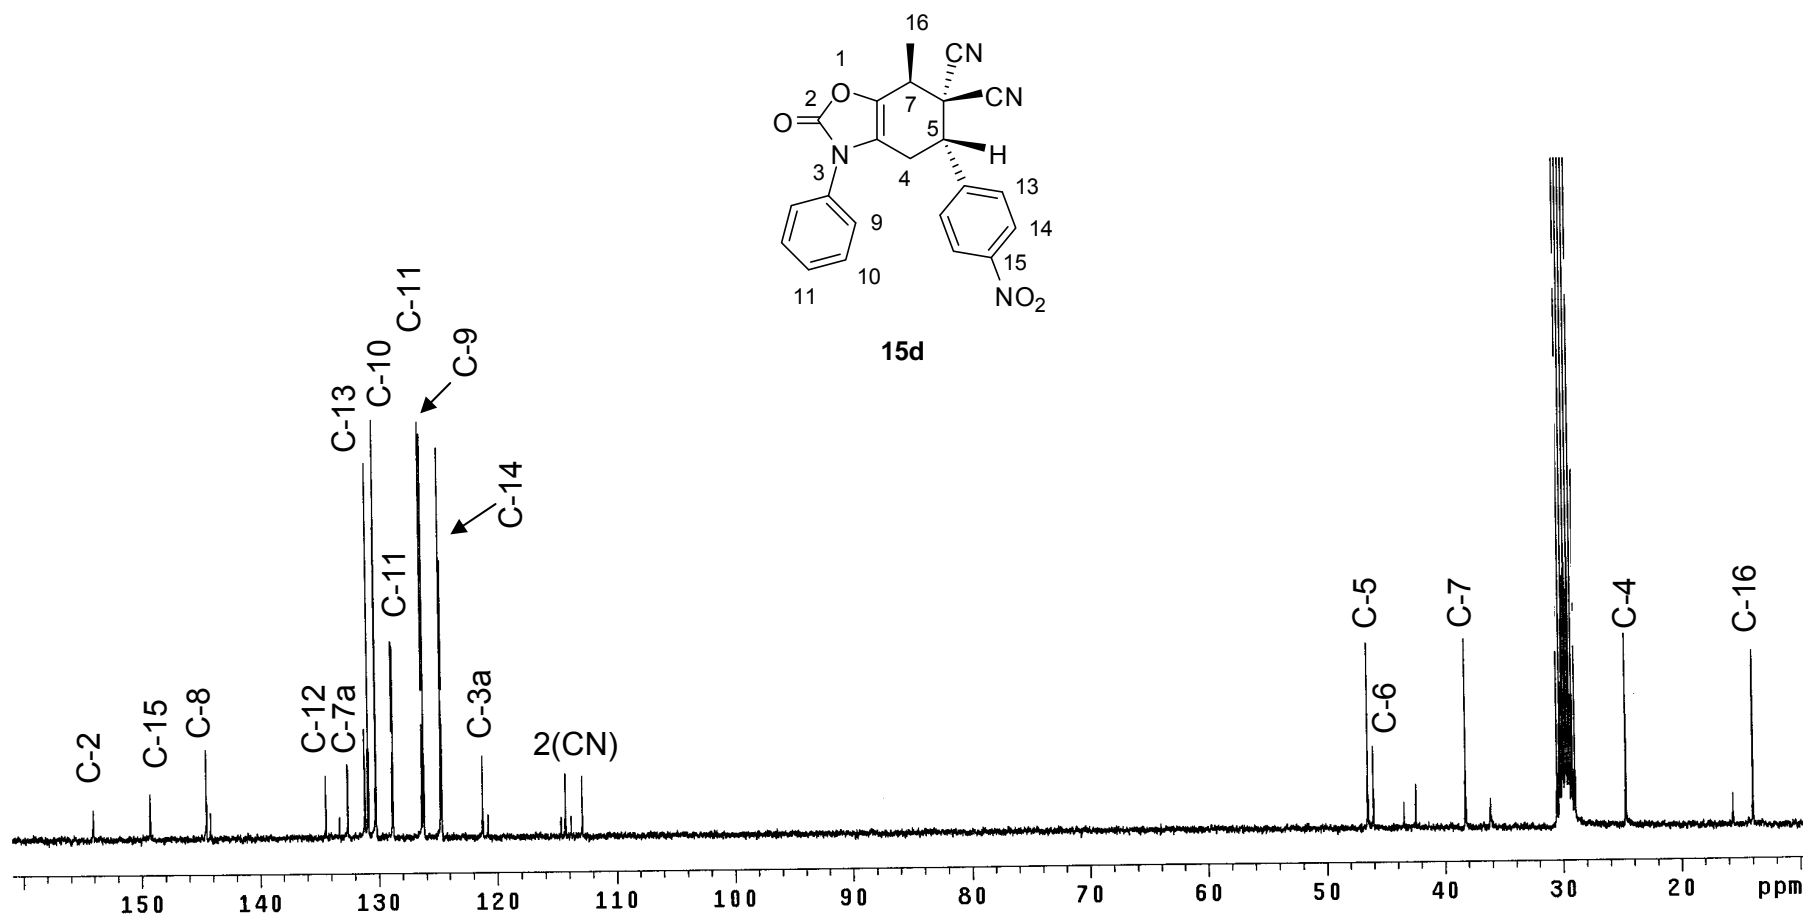 $^1\text{H}$  NMR (CDCl<sub>3</sub>) 15d

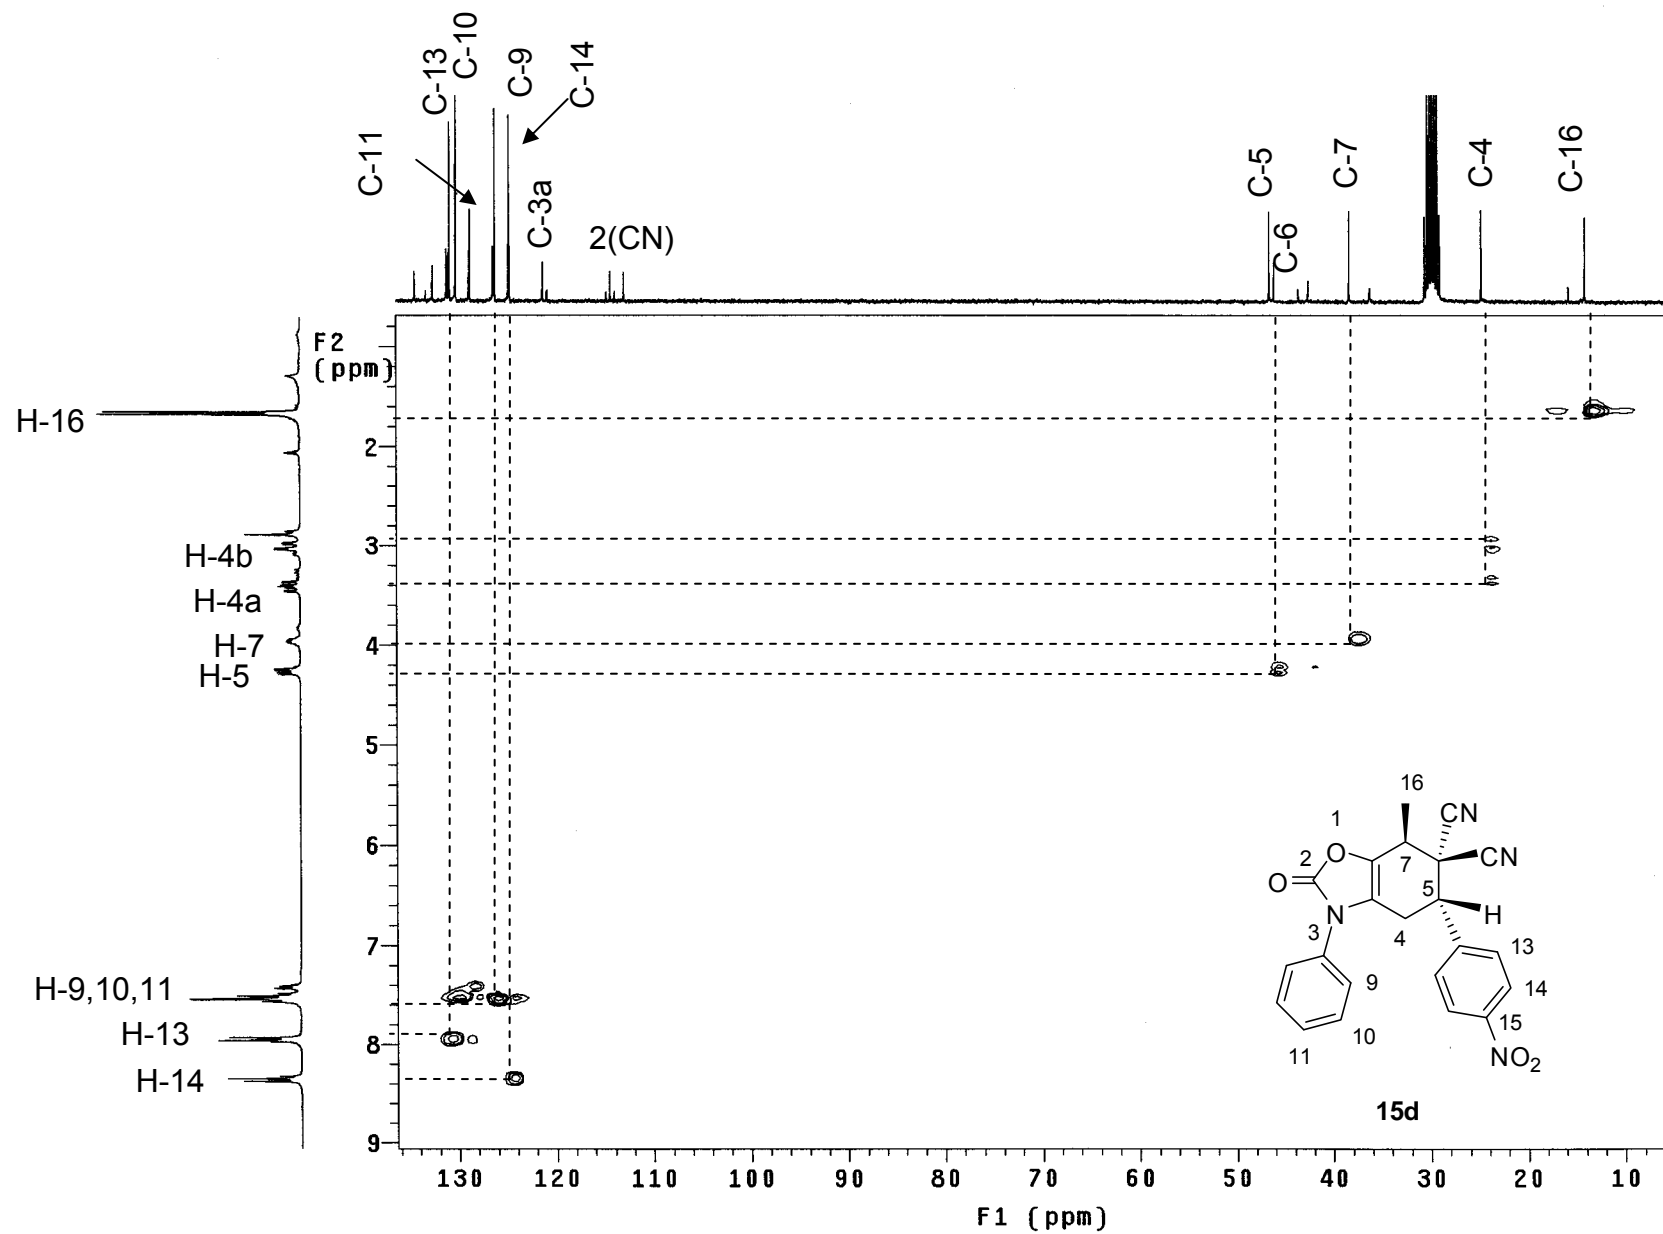

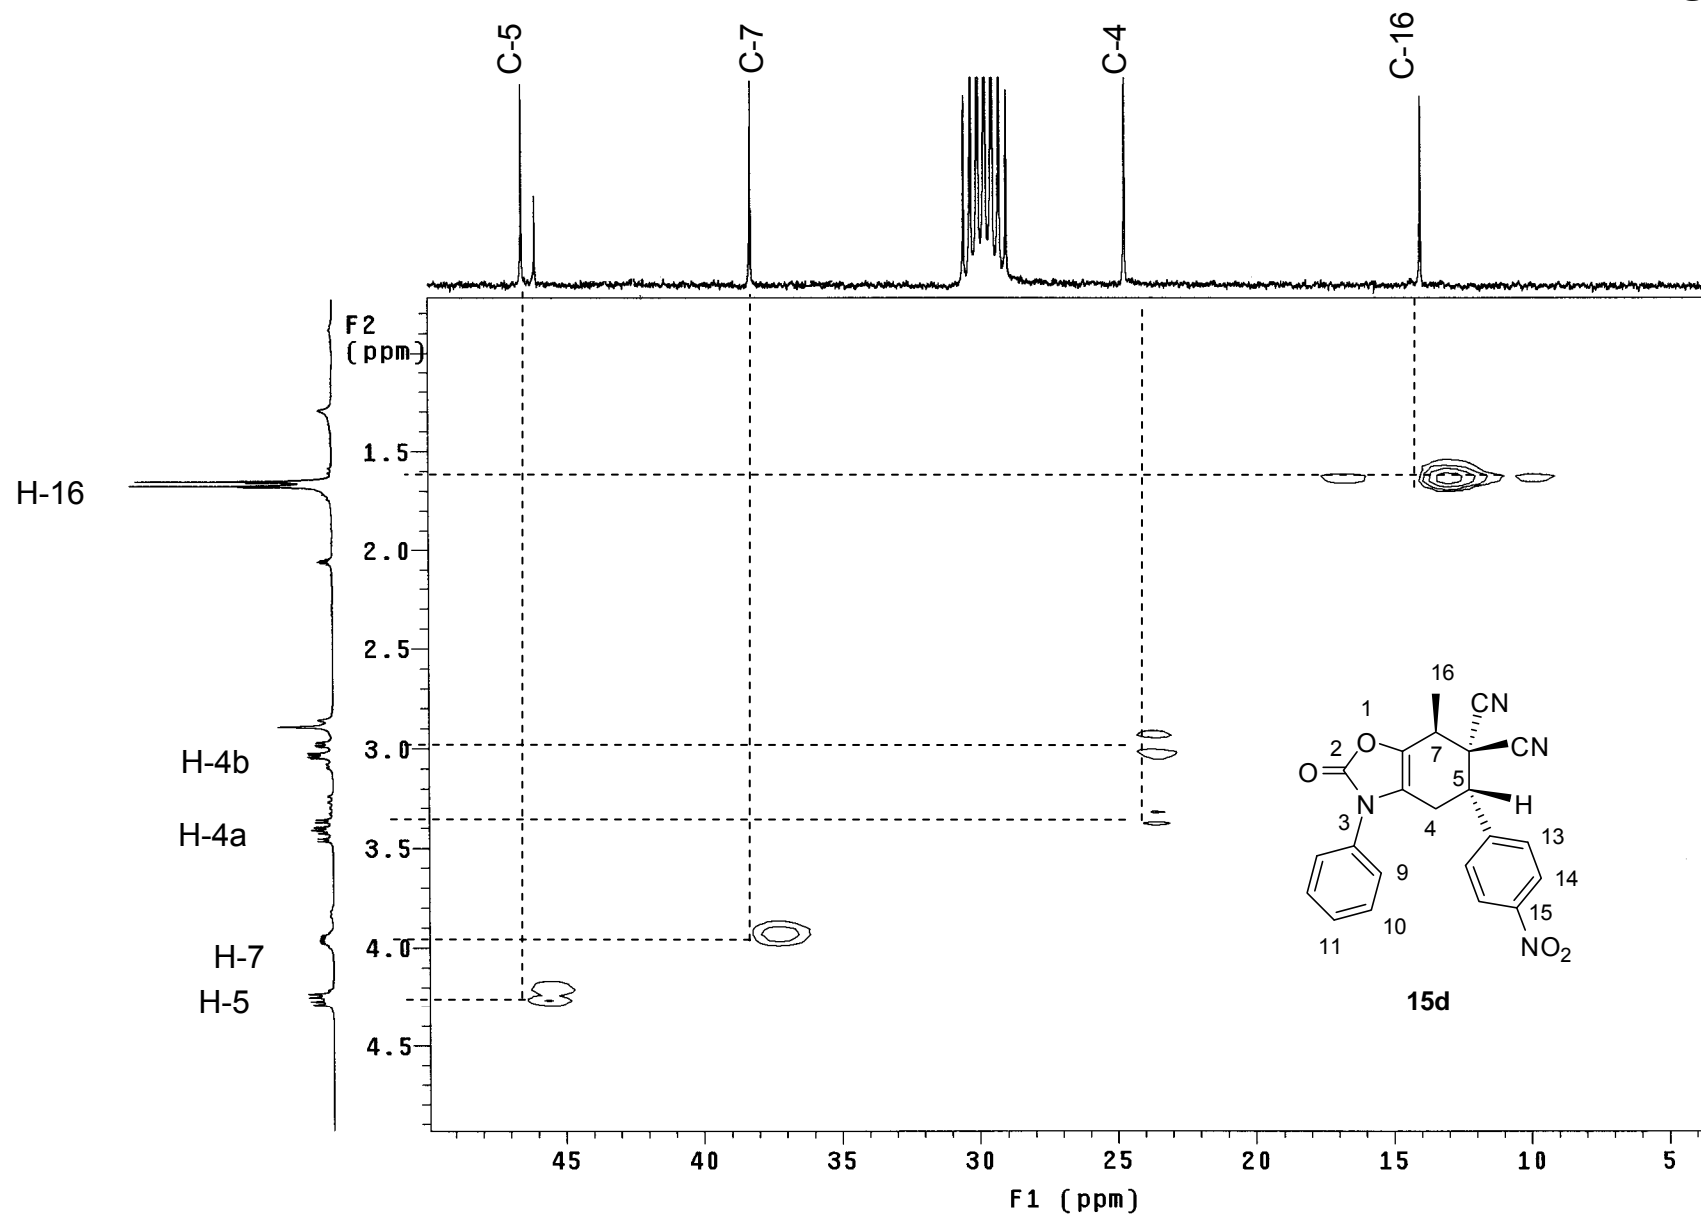

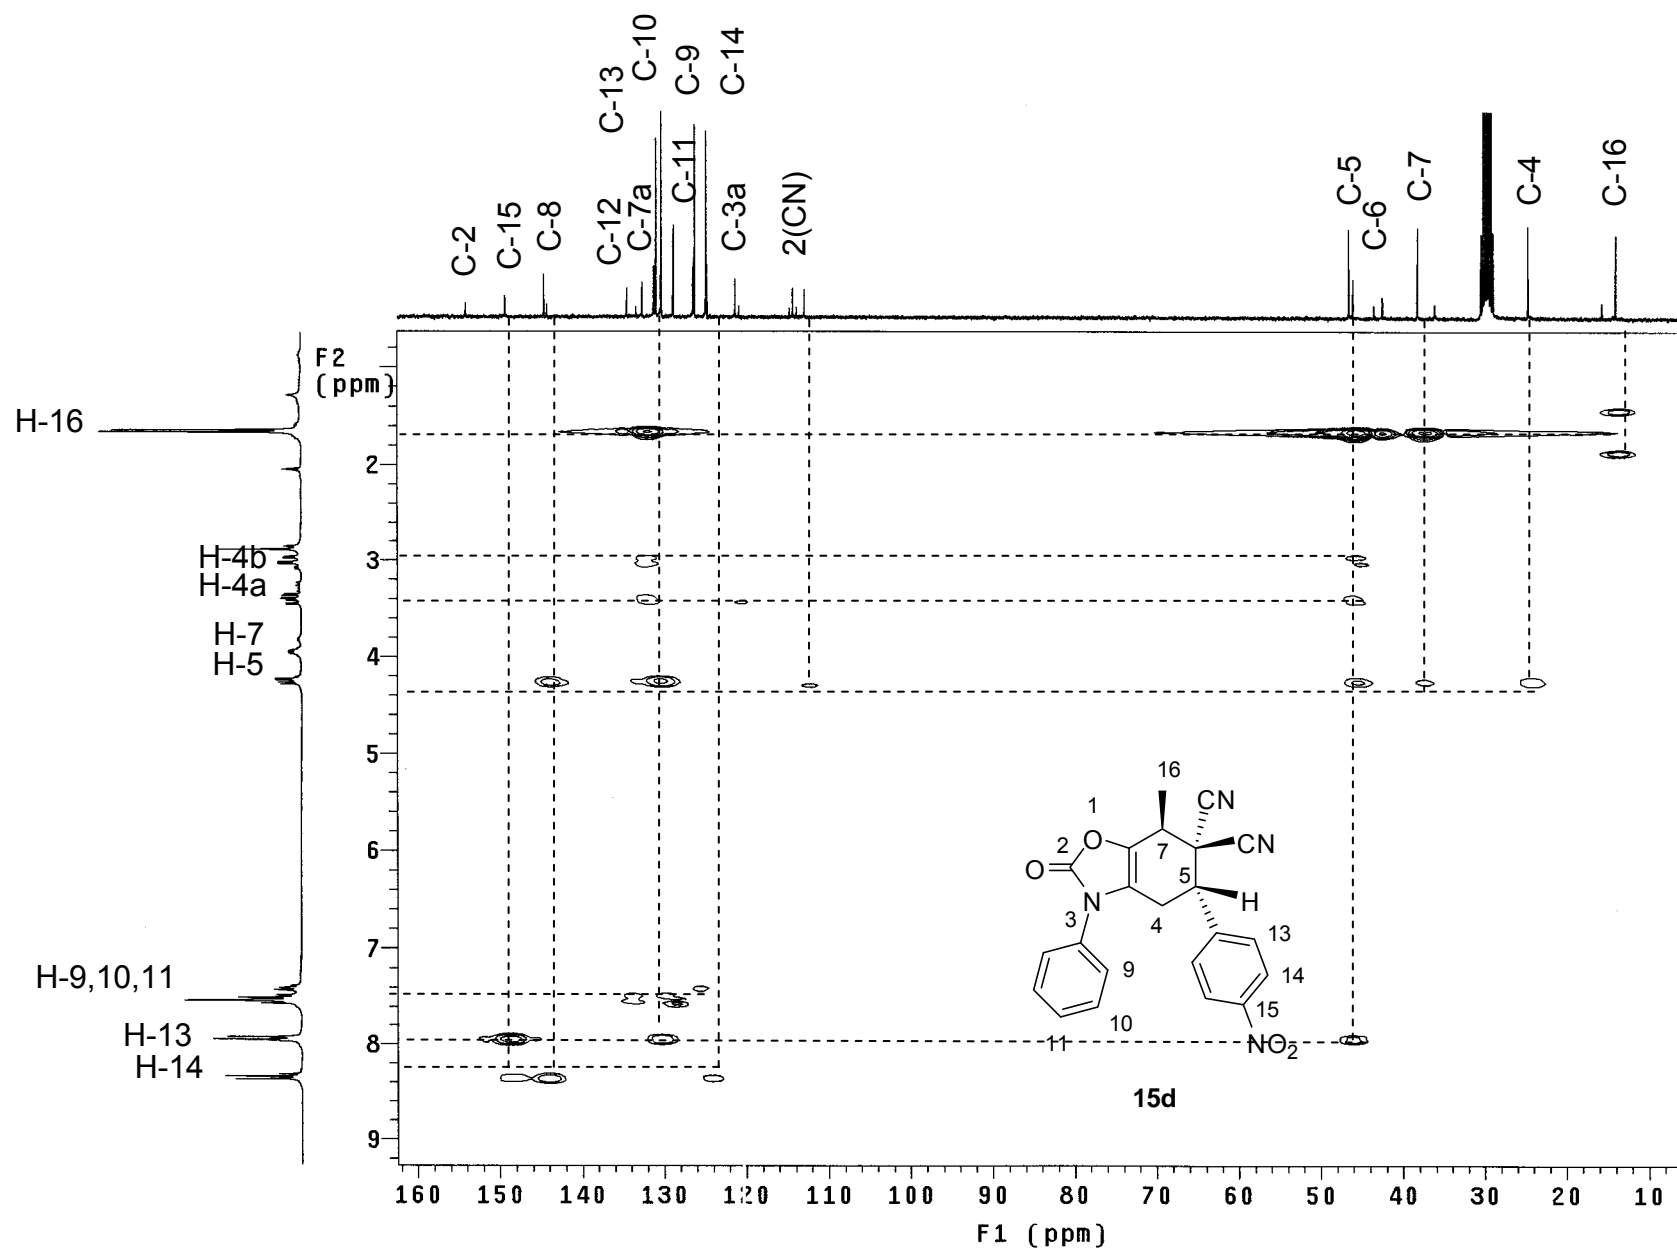

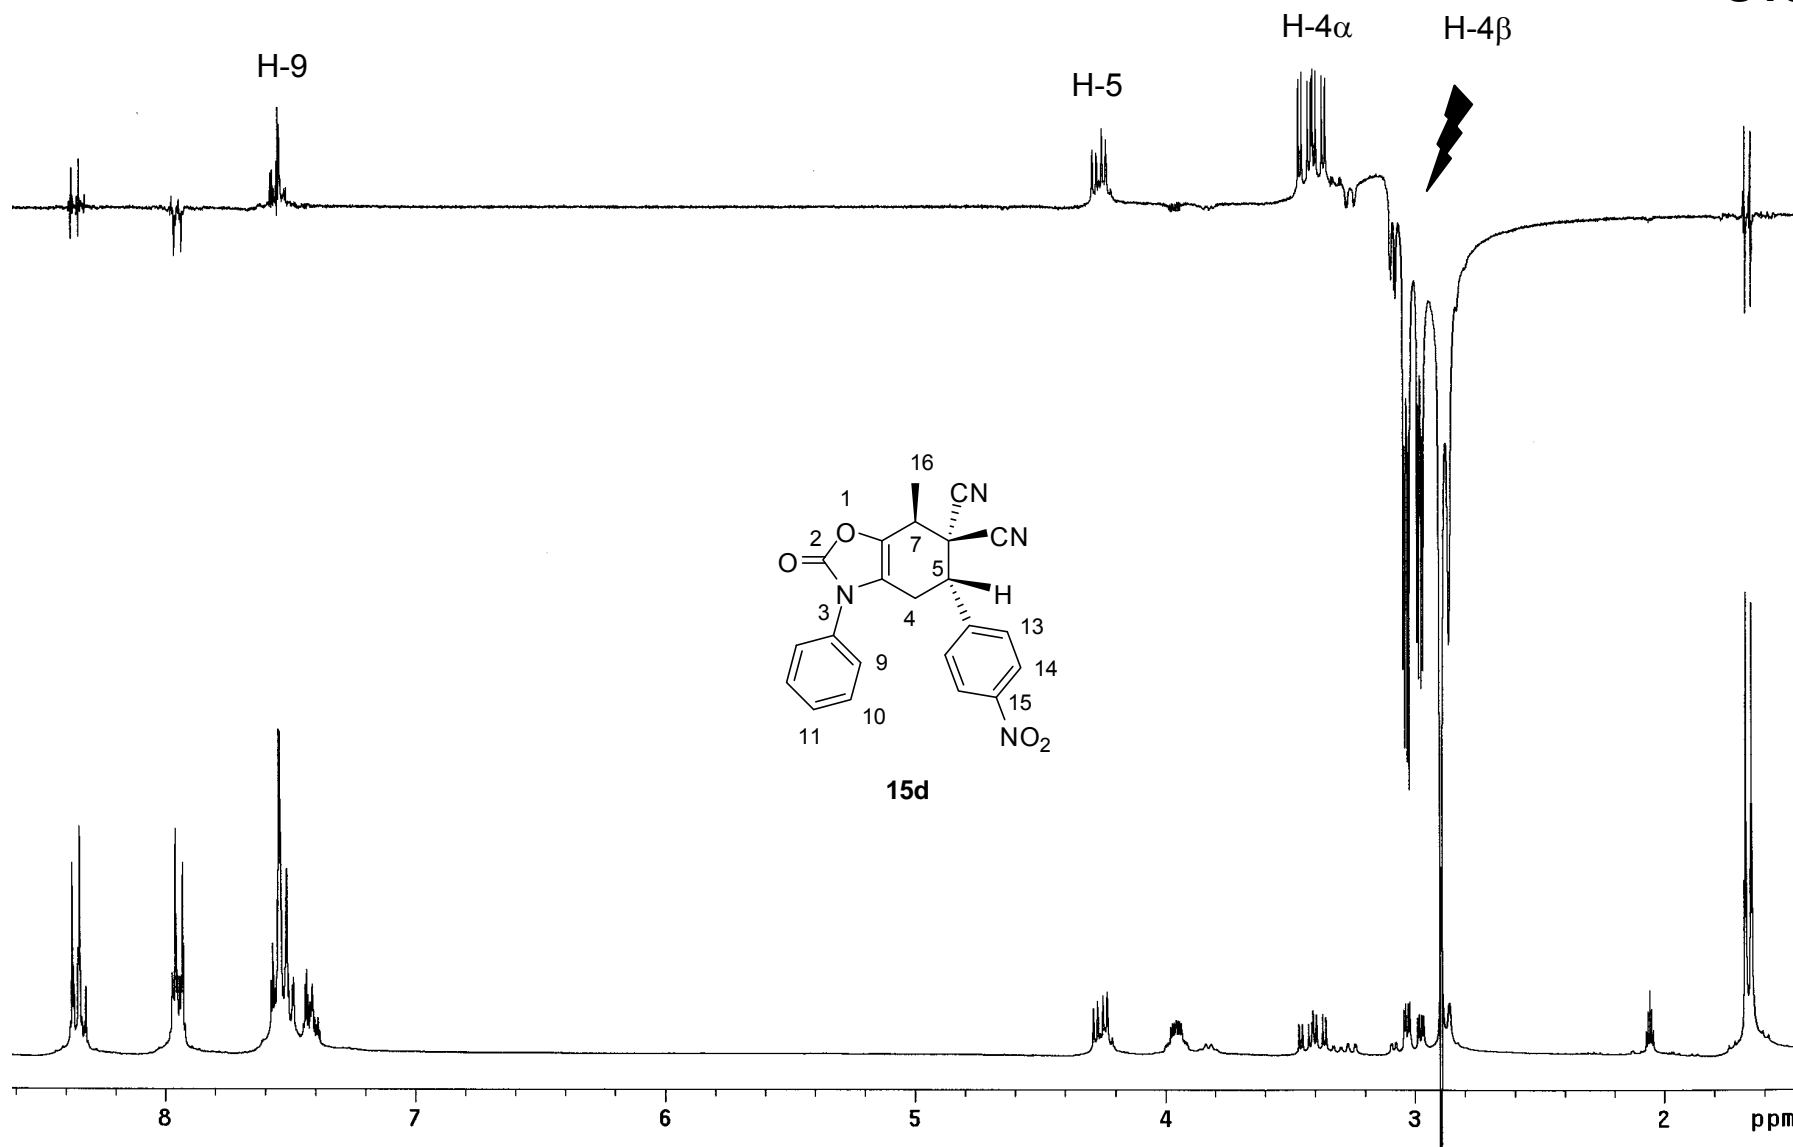NOE experiment (CDCl<sub>3</sub>) **15d**

S134

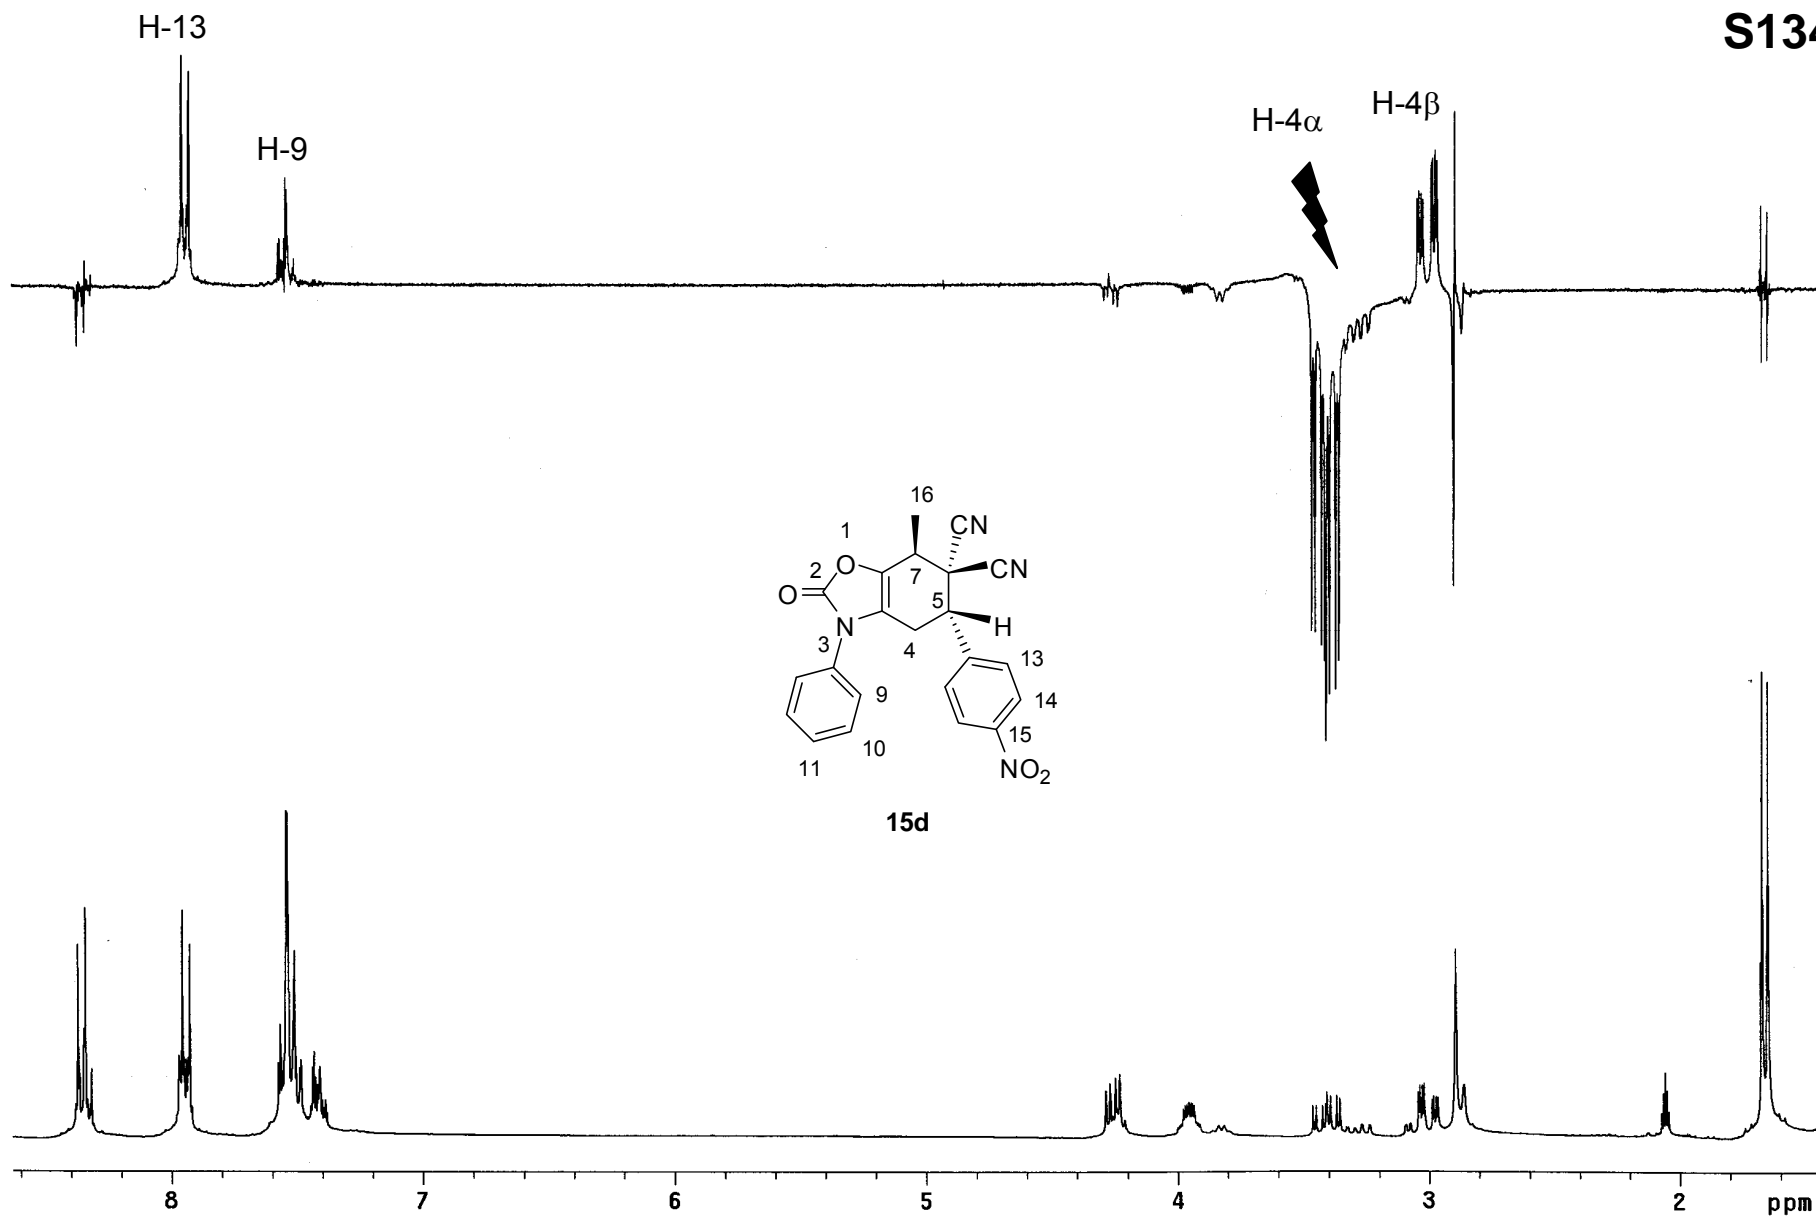

NOE experiment (CDCl<sub>3</sub>) 15d

S135

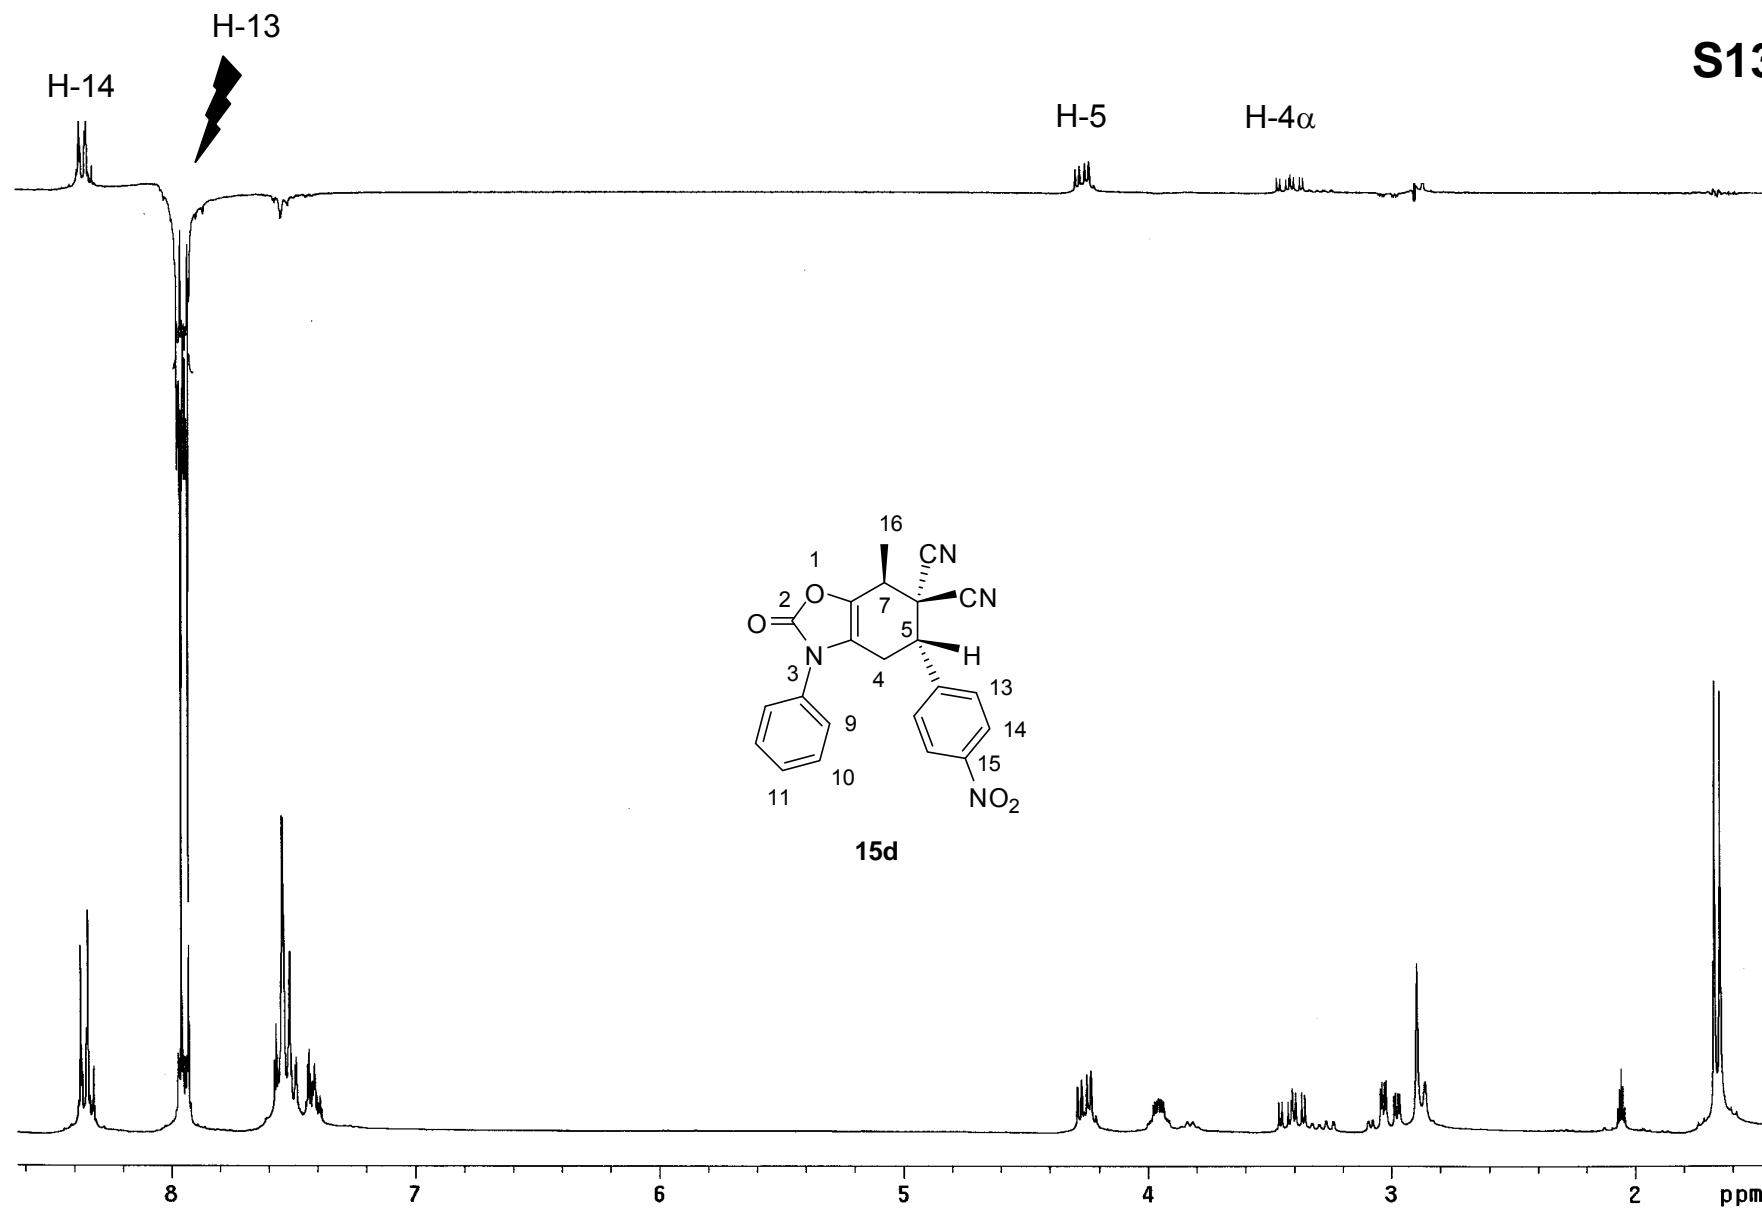



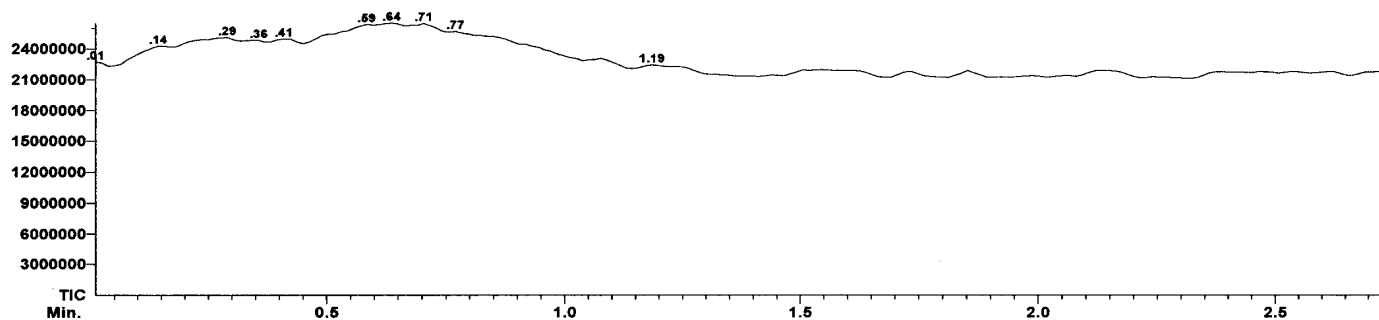

Scan: 39-66

R.T.: .7

Base: m/z 400; 15.3%FS TIC: 1248162

#Ions: 2827

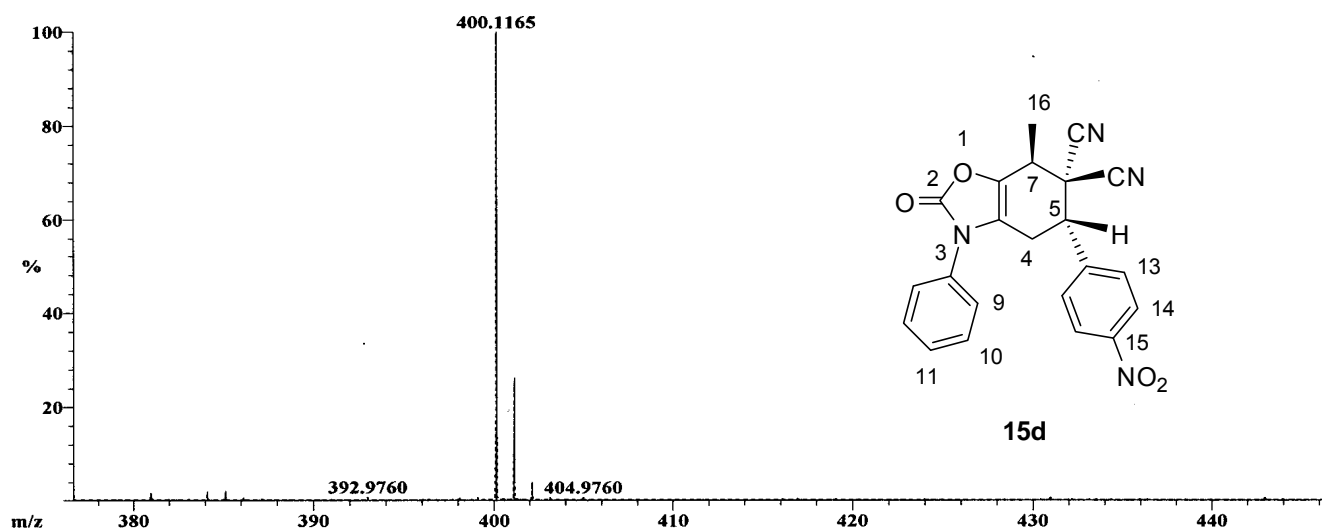Selected Isotopes :  $H_{0-20}C_{0-25}N_{0-5}O_{0-5}$ 

Error Limit : 1 mmu

Measured Mass% BaseFormulaCalculated MassError

400.11651

100.0%

 $C_{22}H_{16}N_4O_4$ 

400.11715

-0.6

HRMS 15d

S137

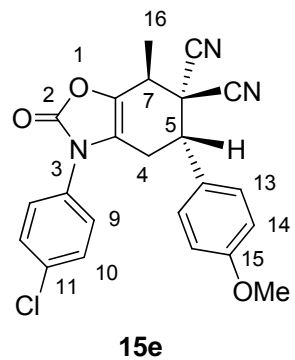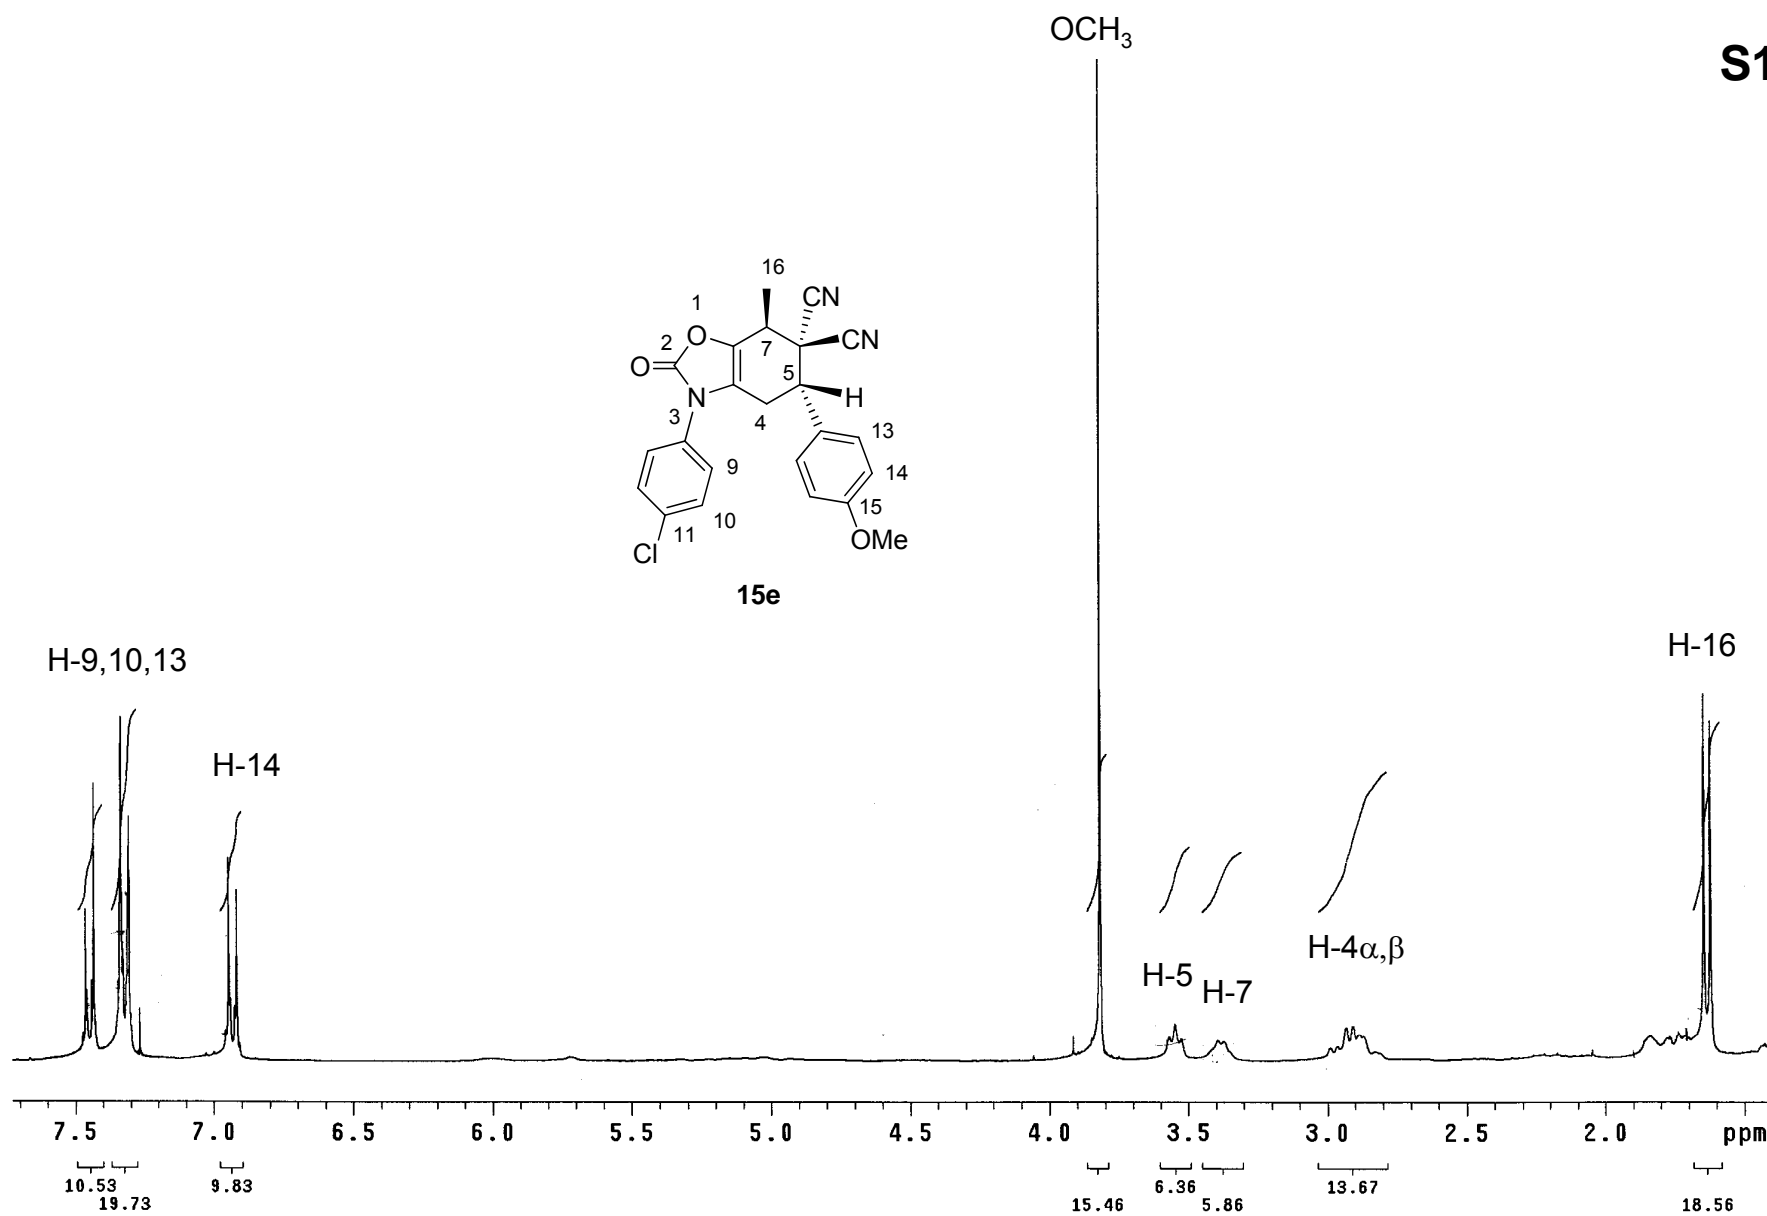

$^1\text{H}$  NMR ( $\text{CDCl}_3$ ) 15e

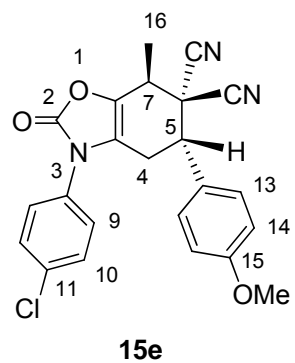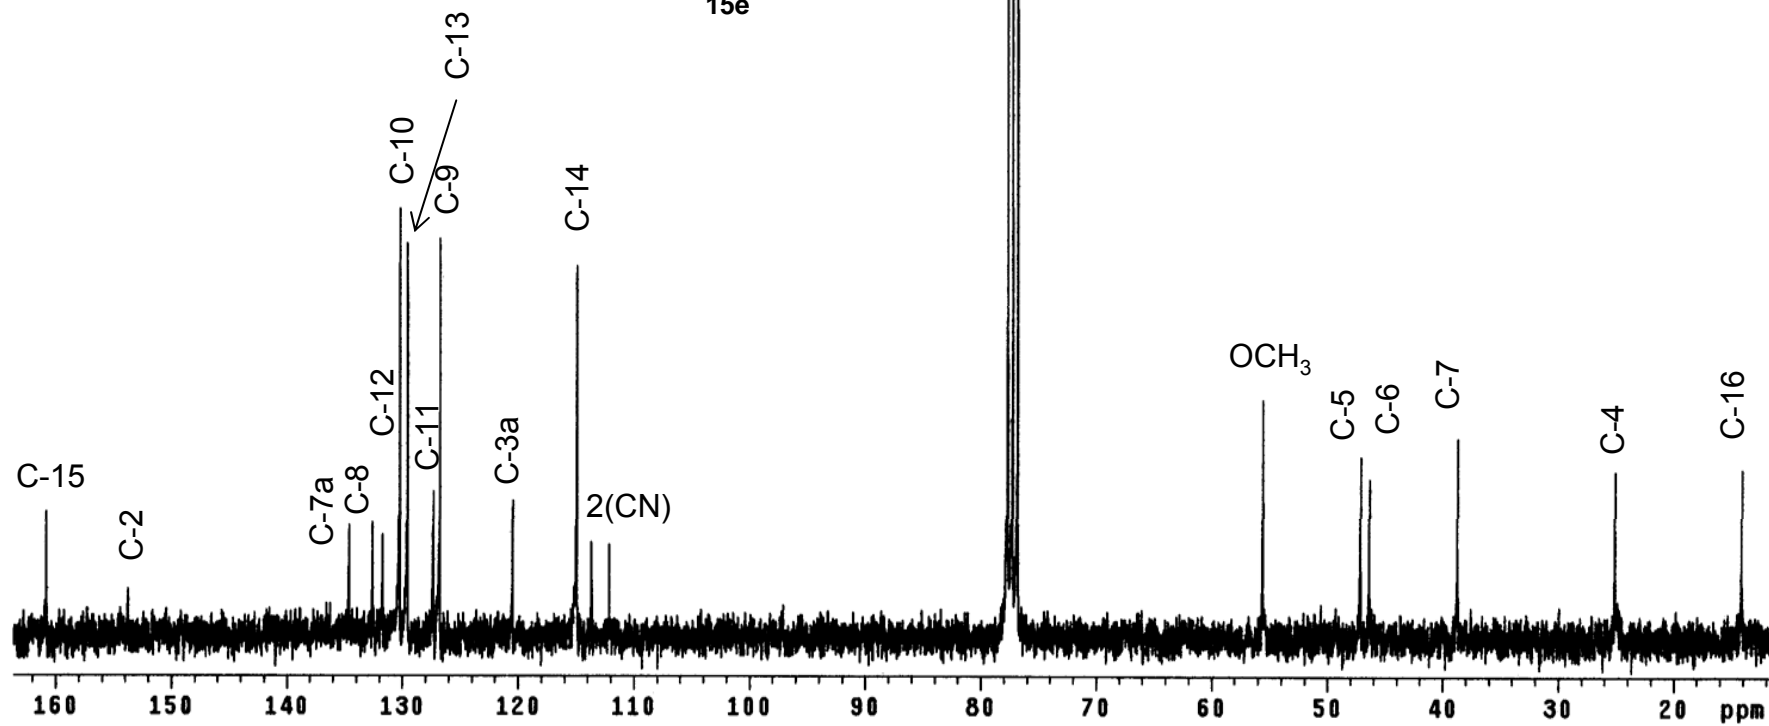

$^{13}\text{C}$  NMR ( $\text{CDCl}_3$ ) 15e

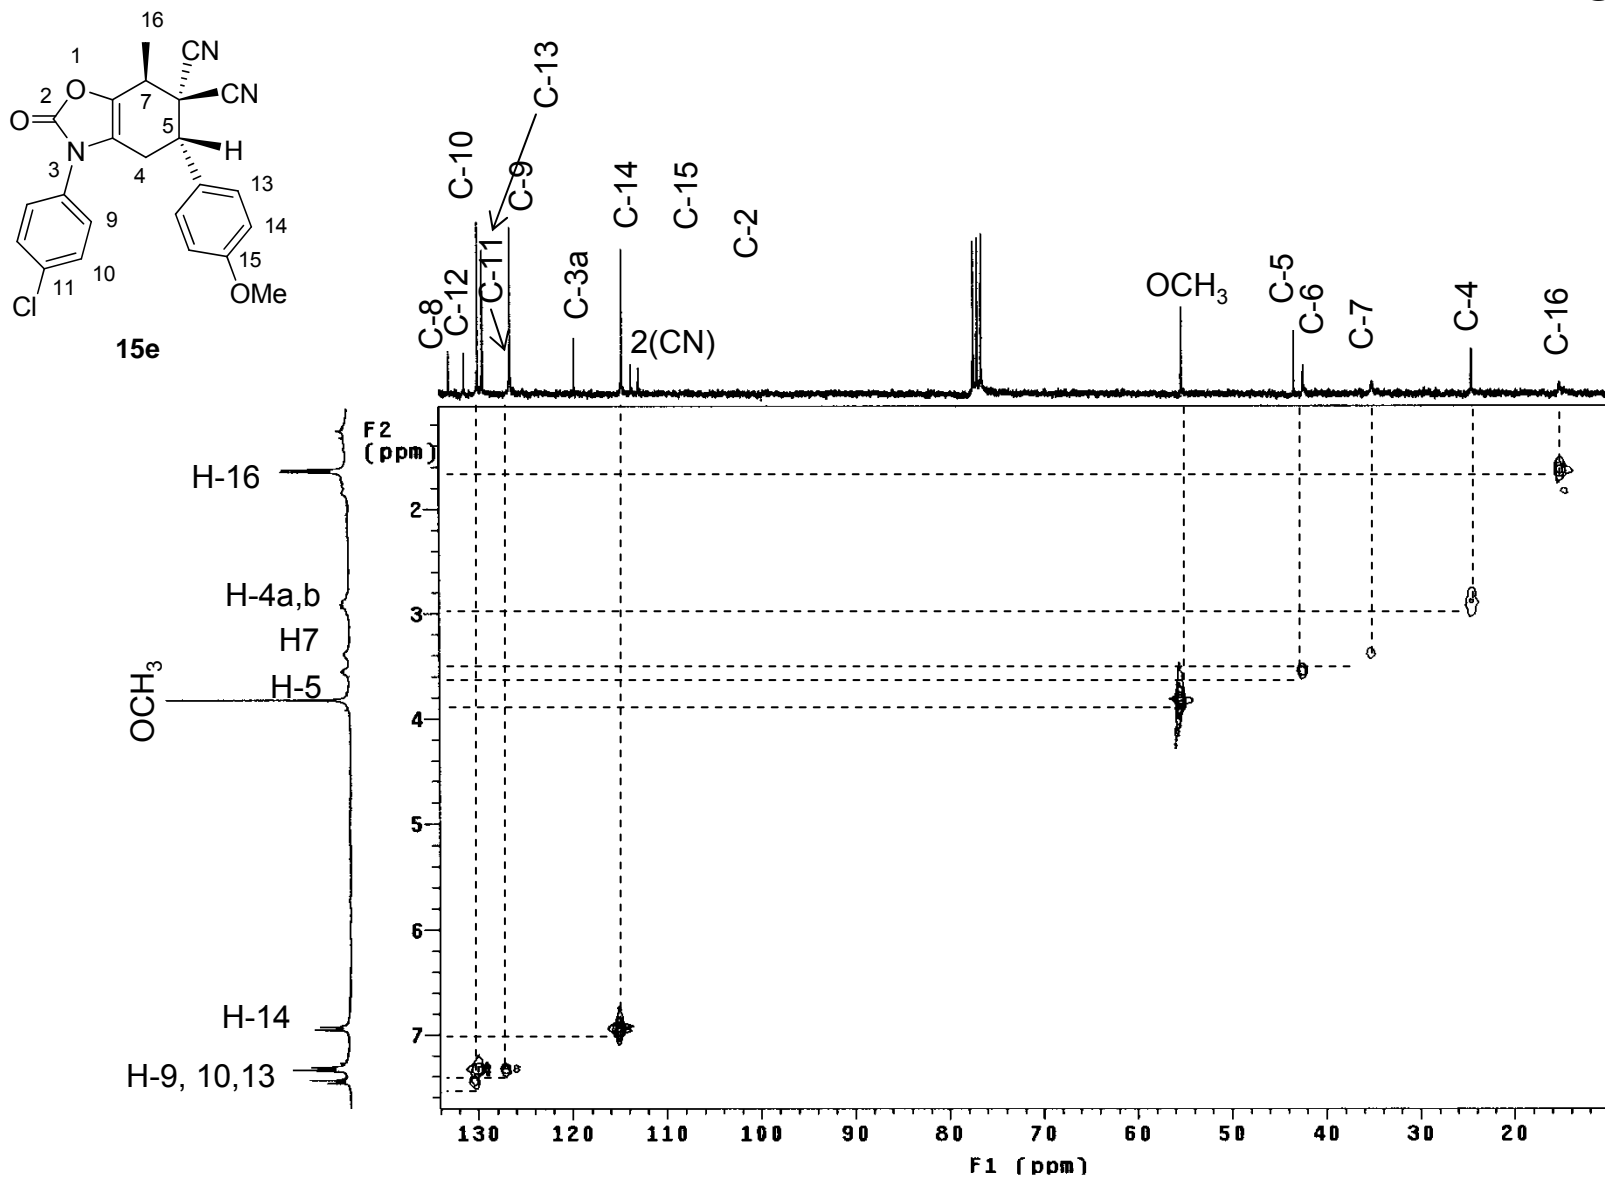HSQC experiment (CDCl<sub>3</sub>) **15e**

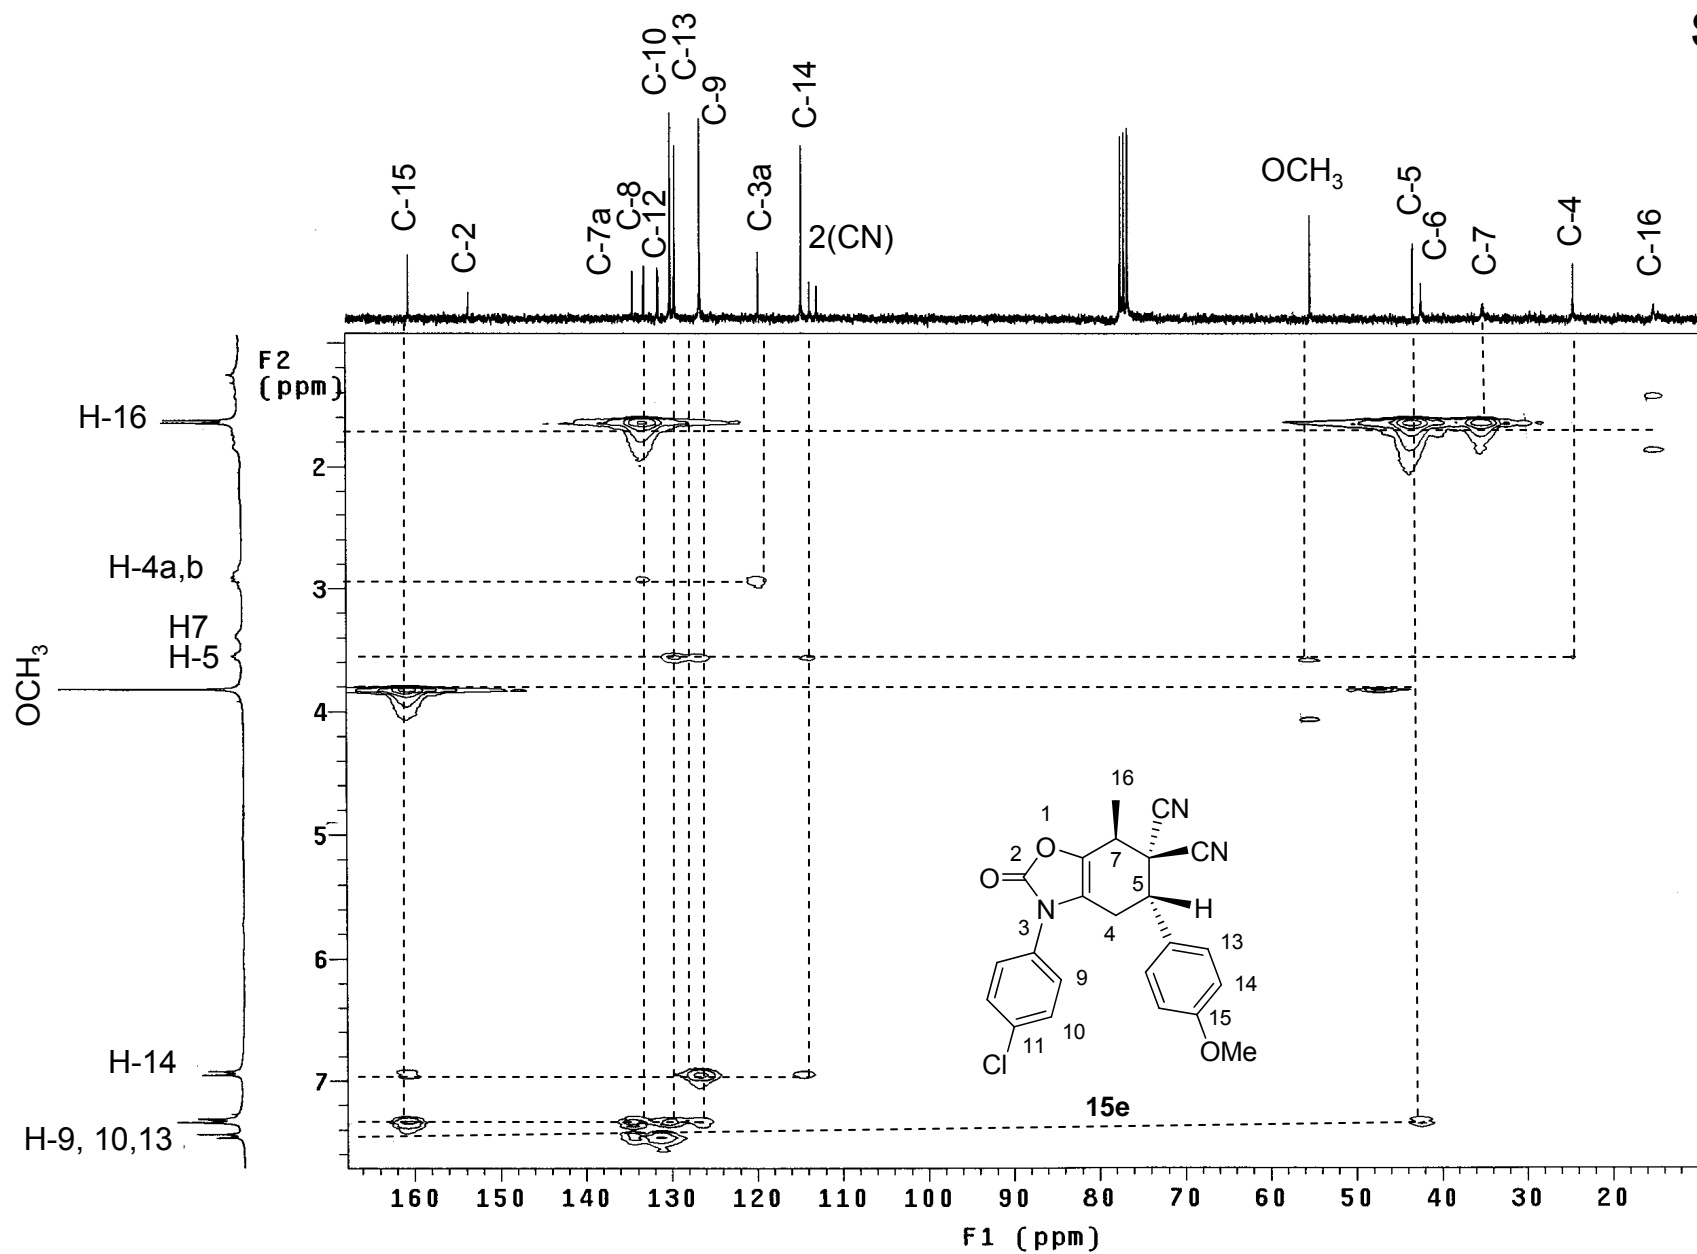

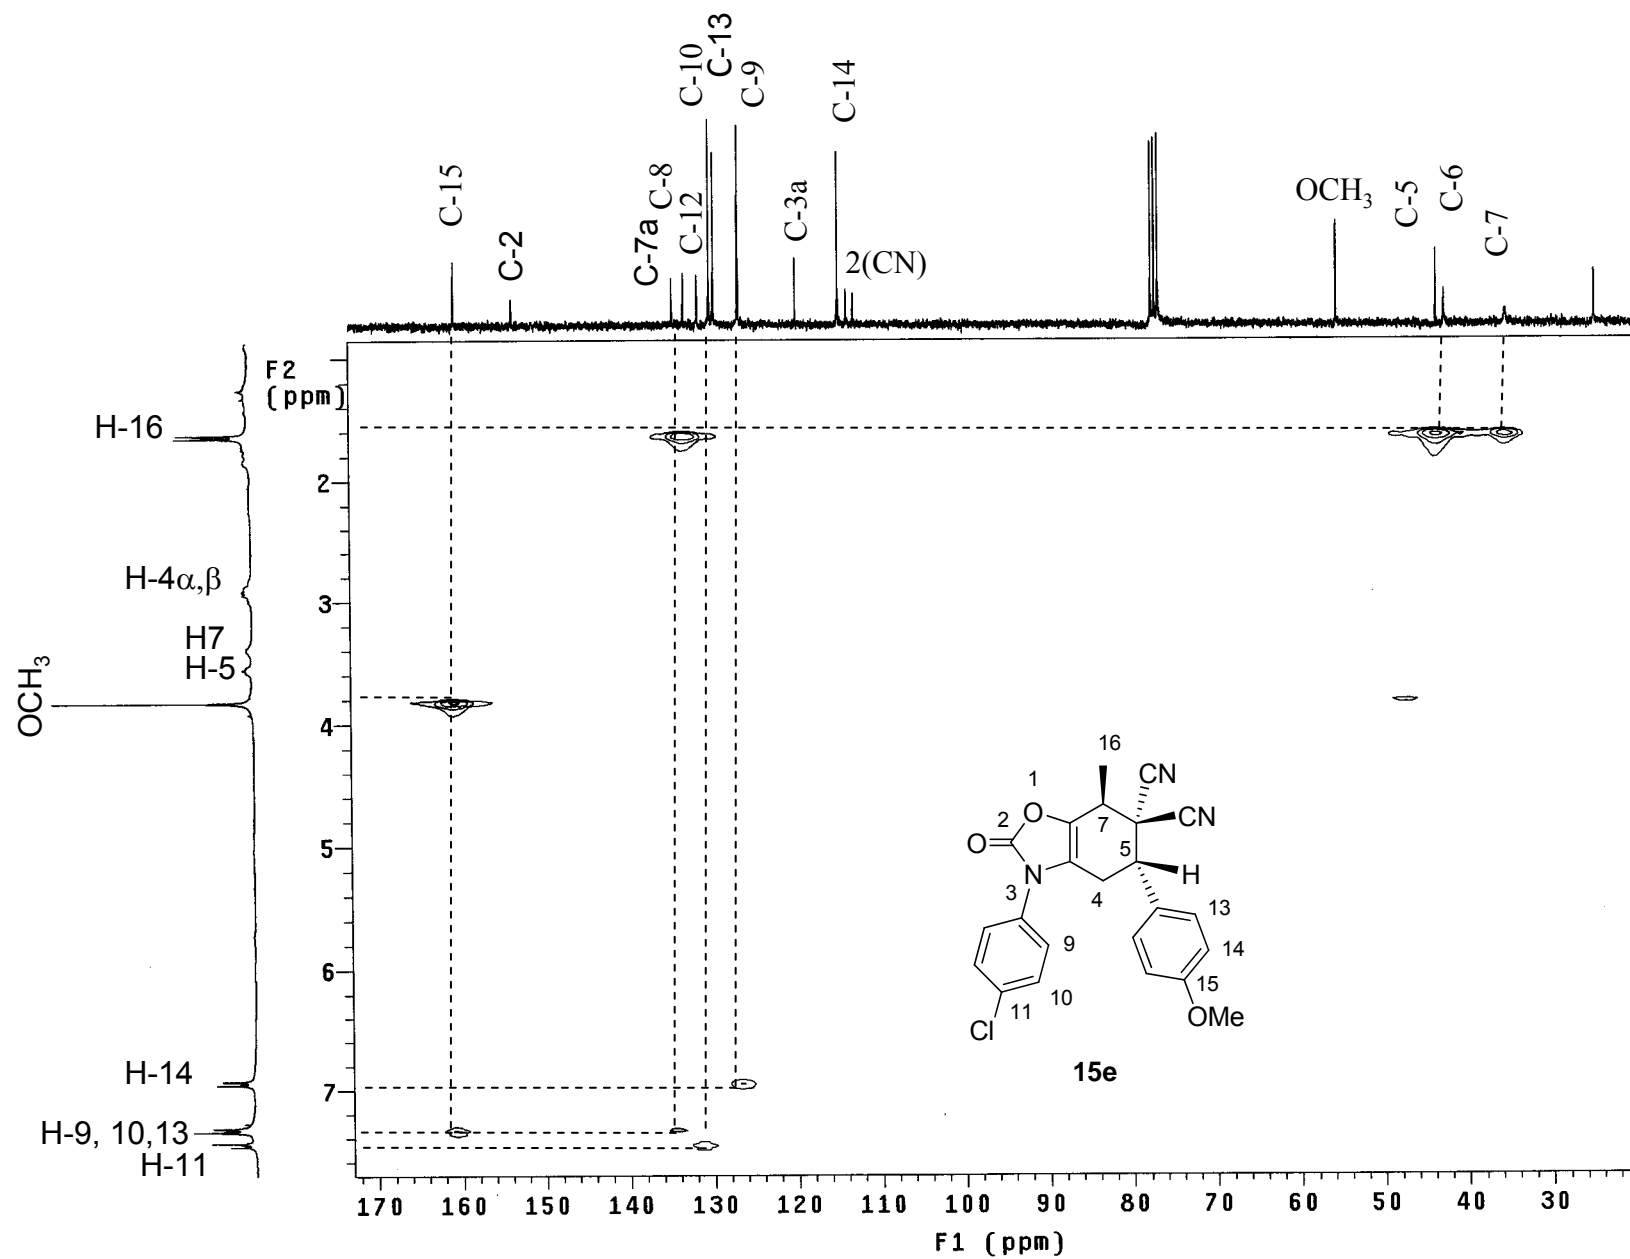

S142

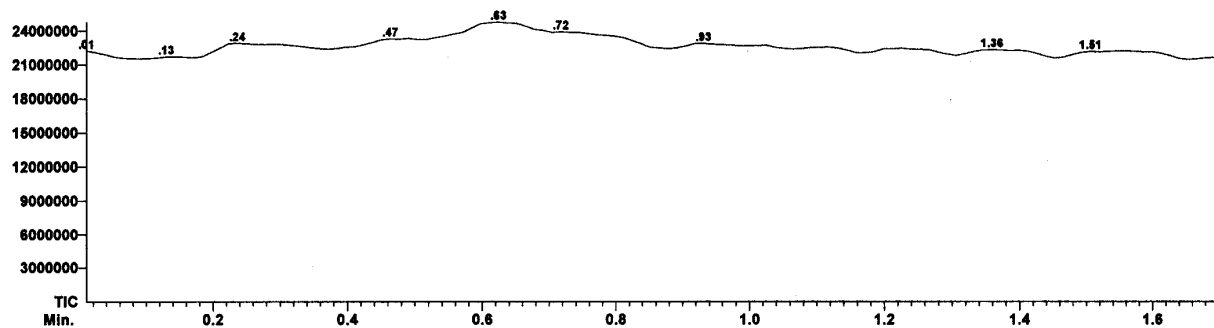

Scan: 41-55

R.T.: .64

Base: m/z 419; 5%FS TIC: 1172306

#Ions: 2913

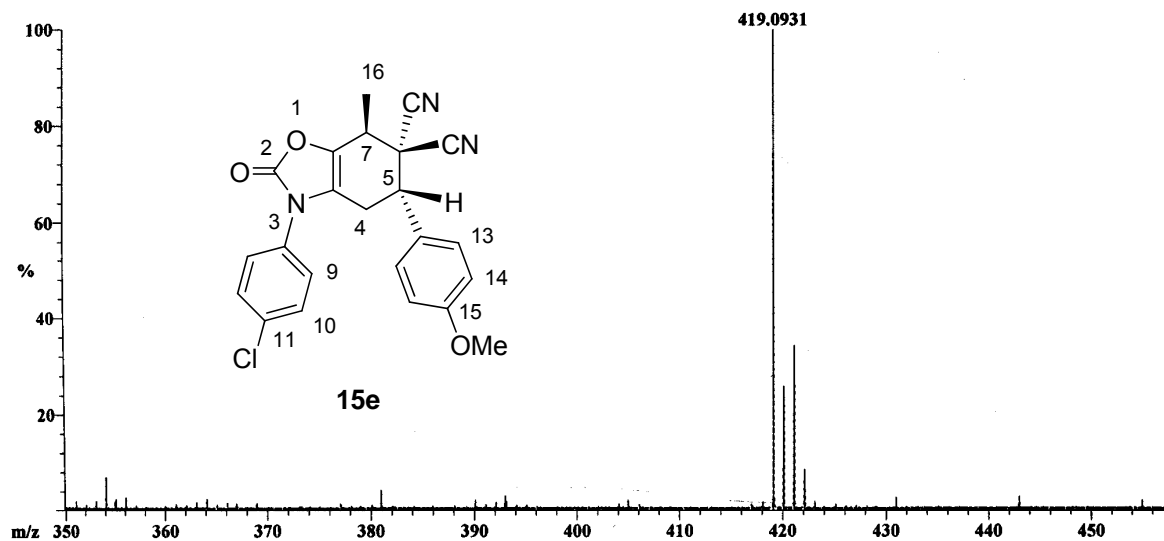

Selected Isotopes : H<sub>0-20</sub> C<sub>0-25</sub> N<sub>0-4</sub> O<sub>0-4</sub> Cl<sub>0-2</sub>

Error Limit : 1 mmu

| <u>Measured Mass</u> | <u>% Base</u> | <u>Formula</u>                                                   | <u>Calculated Mass</u> | <u>Error</u> |
|----------------------|---------------|------------------------------------------------------------------|------------------------|--------------|
| 419.09314            | 100.0%        | C <sub>24</sub> H <sub>18</sub> N <sub>2</sub> O <sub>4</sub> Cl | 419.09243              | 0.7          |

HRMS 15e

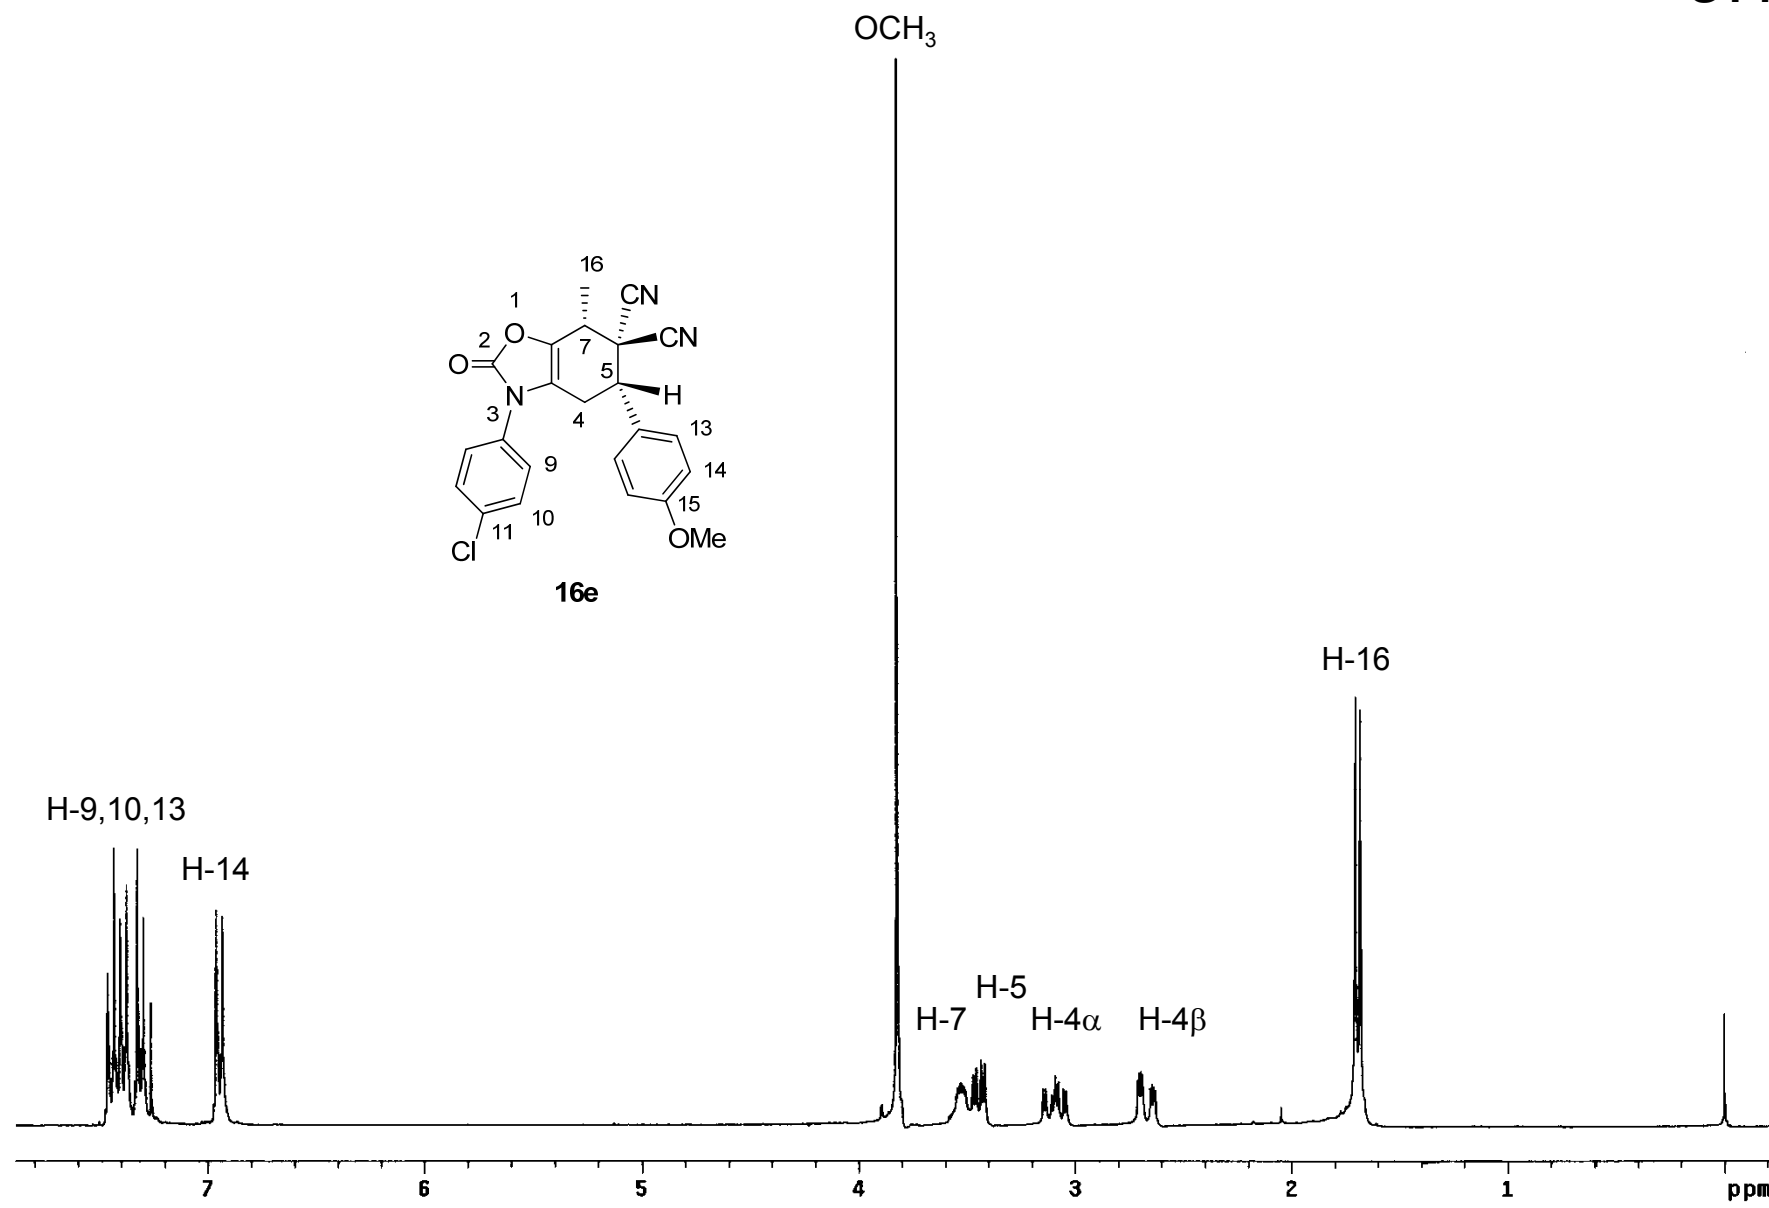 $^1\text{H}$  NMR ( $\text{CDCl}_3$ ) **16e**



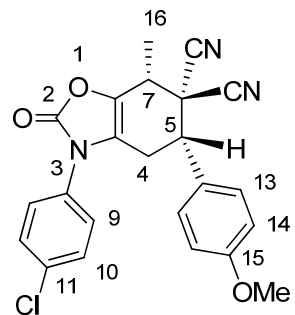

16e

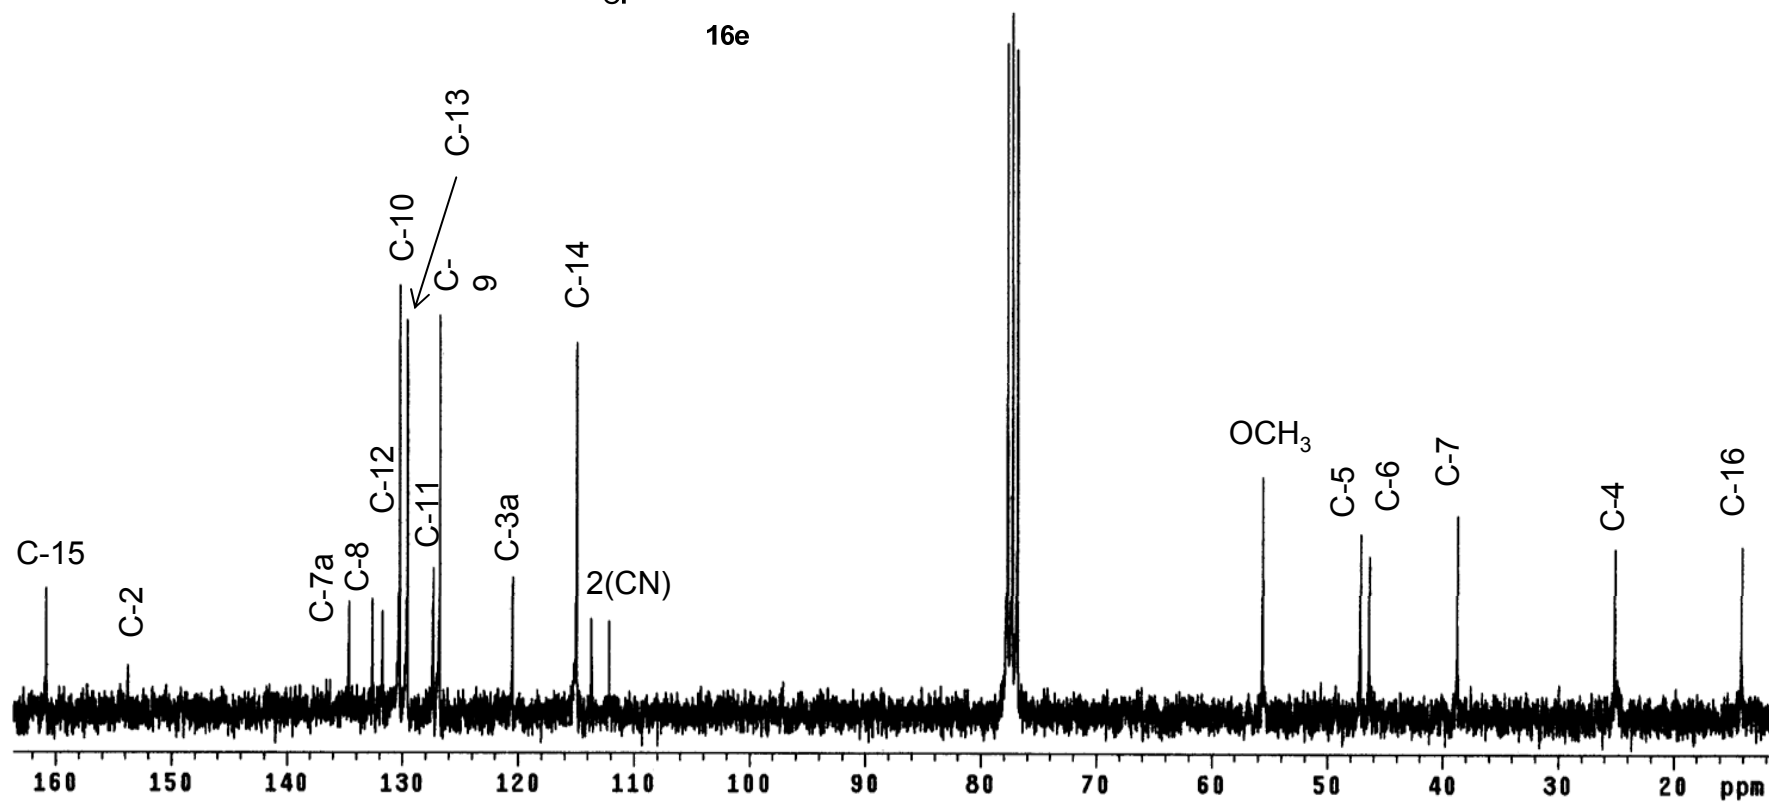 $^{13}\text{C}$  NMR ( $\text{CDCl}_3$ ) 16e

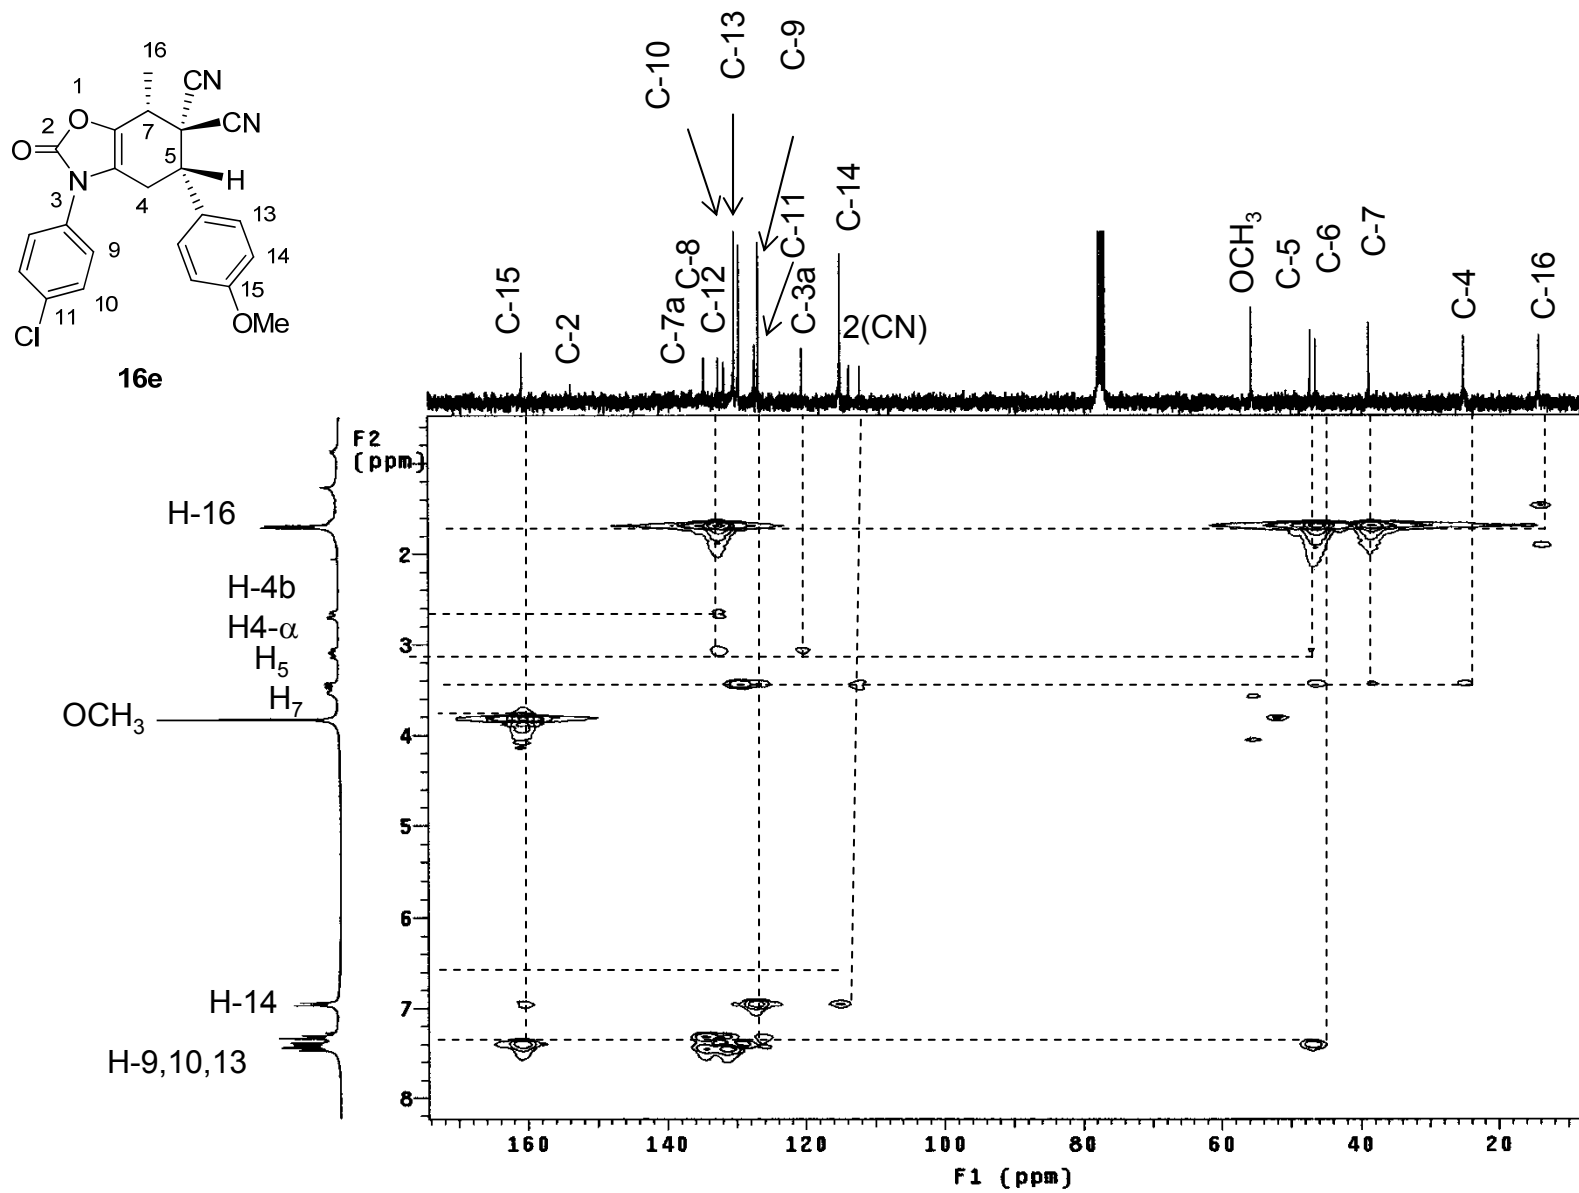HMBC experiment (CDCl<sub>3</sub>) **16e**

S146

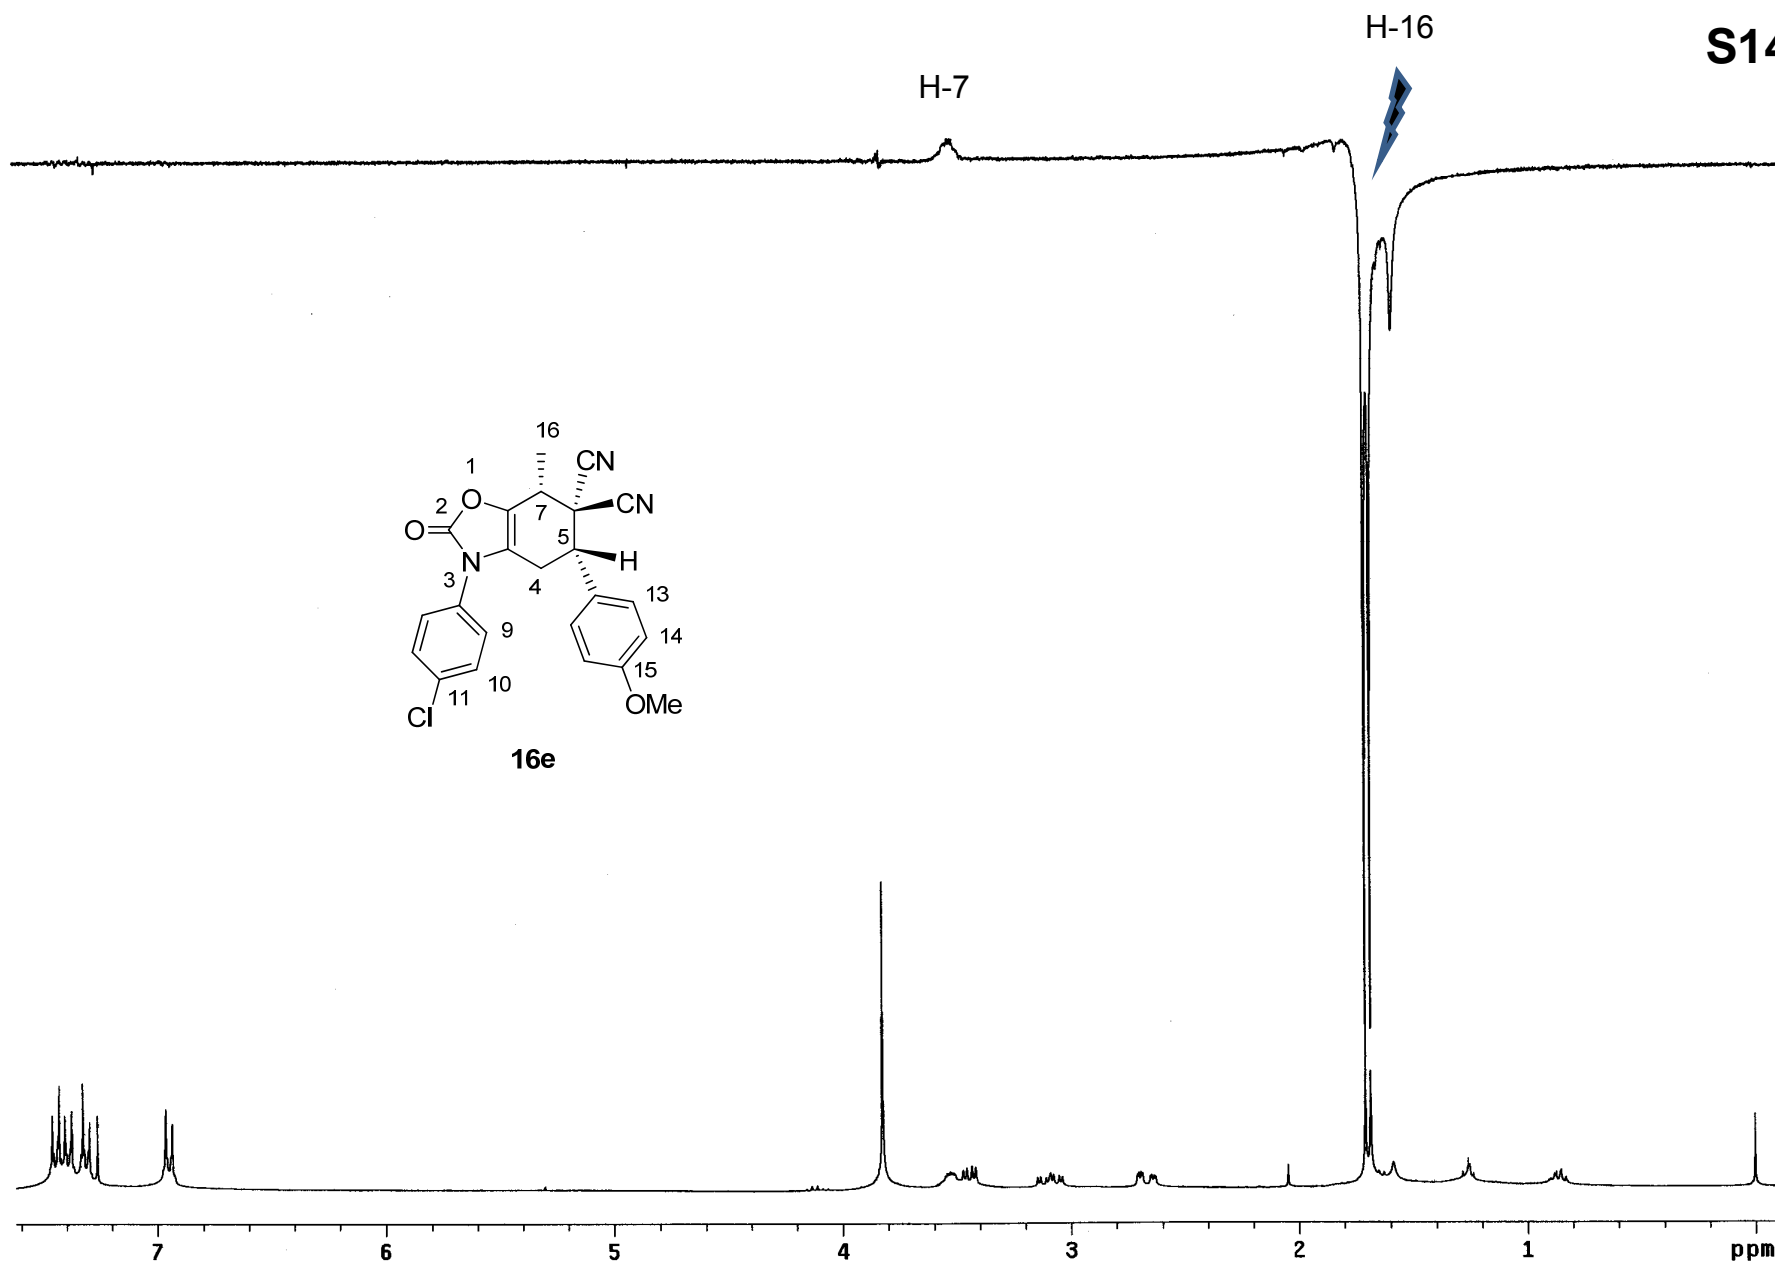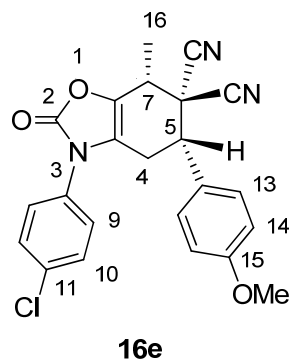

NOE experiment (CDCl<sub>3</sub>) 16e

H-9,13

H-4 $\alpha$

H-4 $\beta$

S147

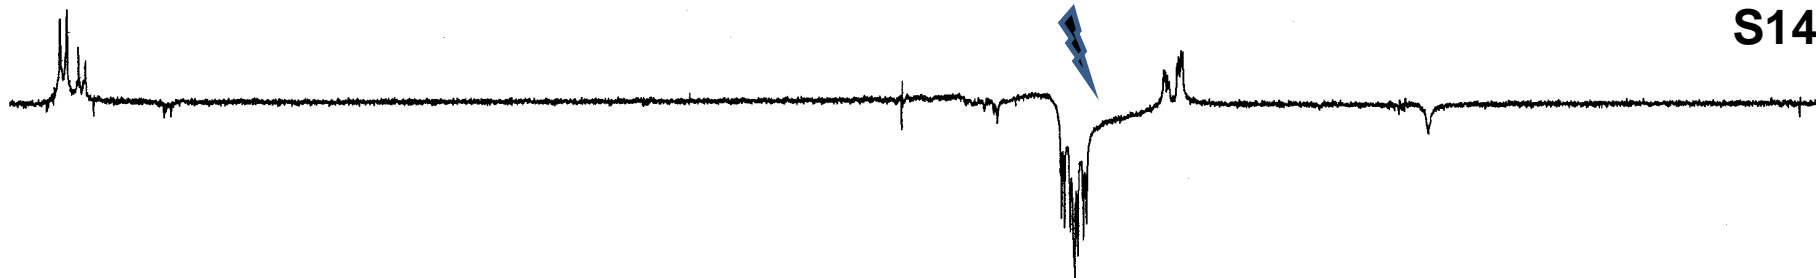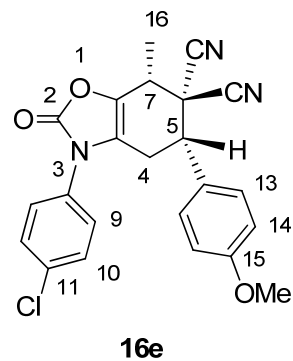

16e

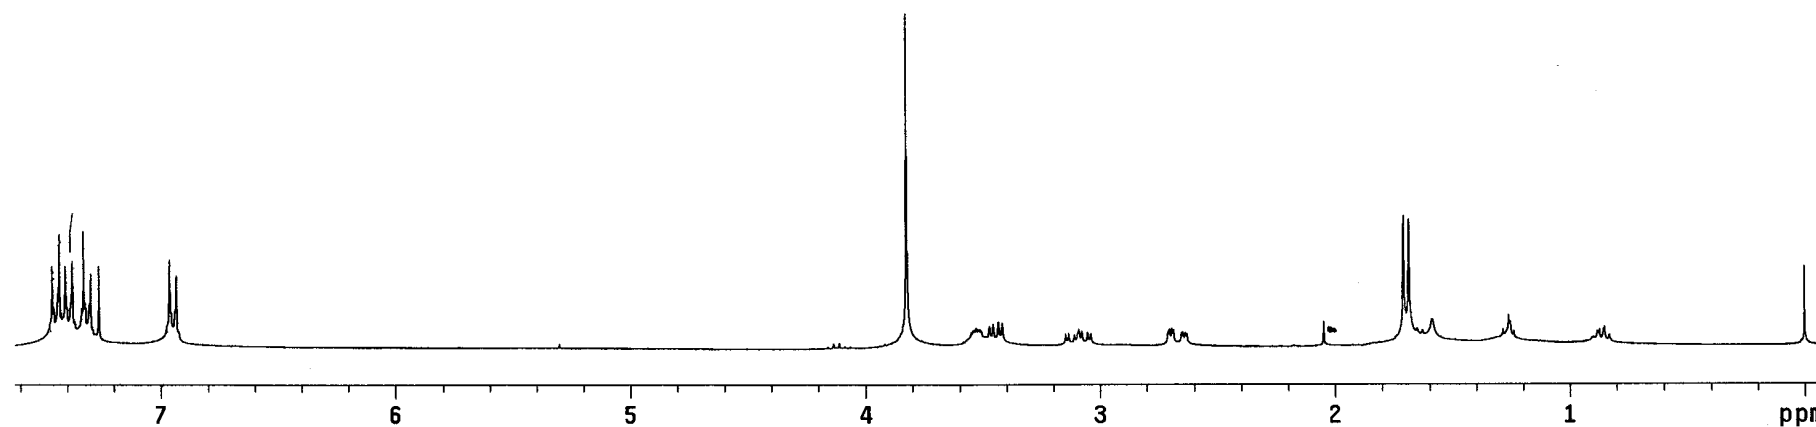

NOE experiment (CDCl<sub>3</sub>) 16e

H-9, 13

S148

H-5 H-4 $\alpha$  H-4 $\beta$

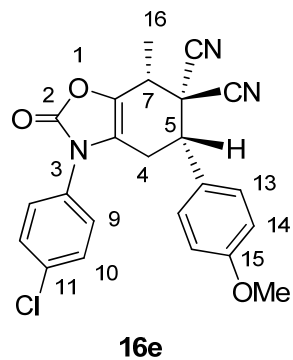

**16e**

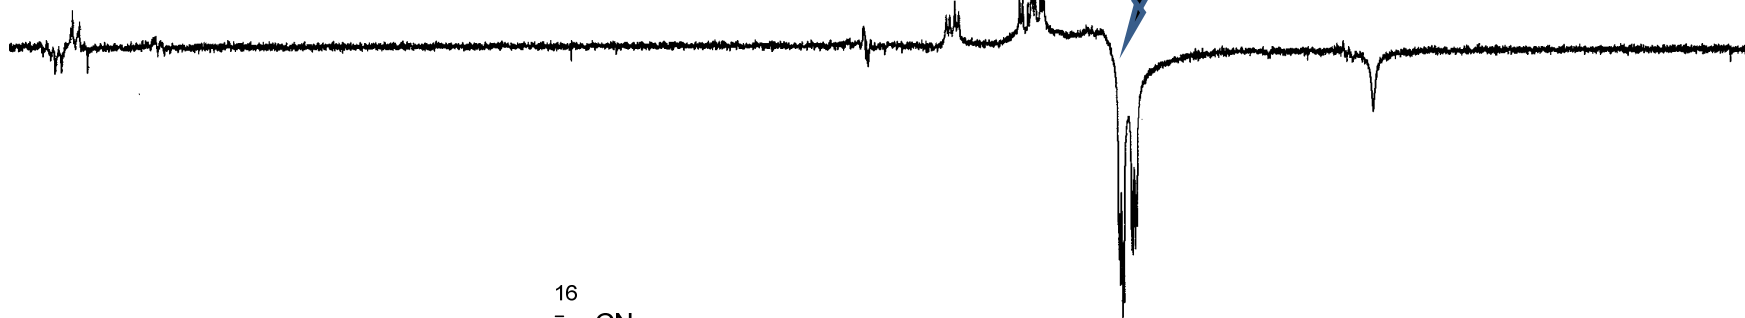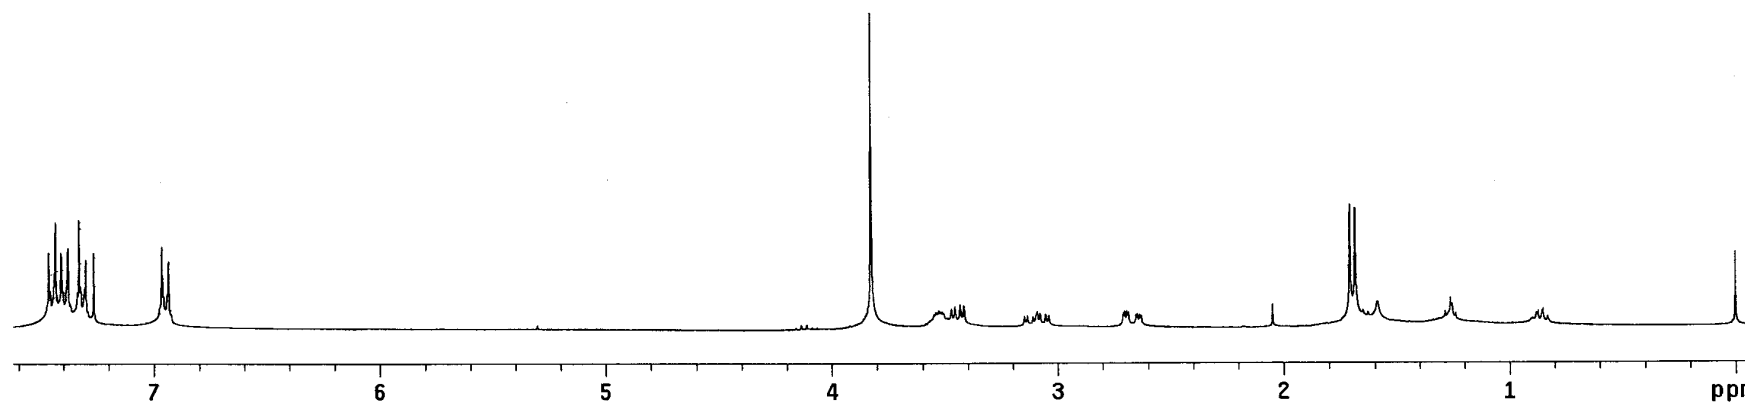

NOE experiment (CDCl<sub>3</sub>) **16e**

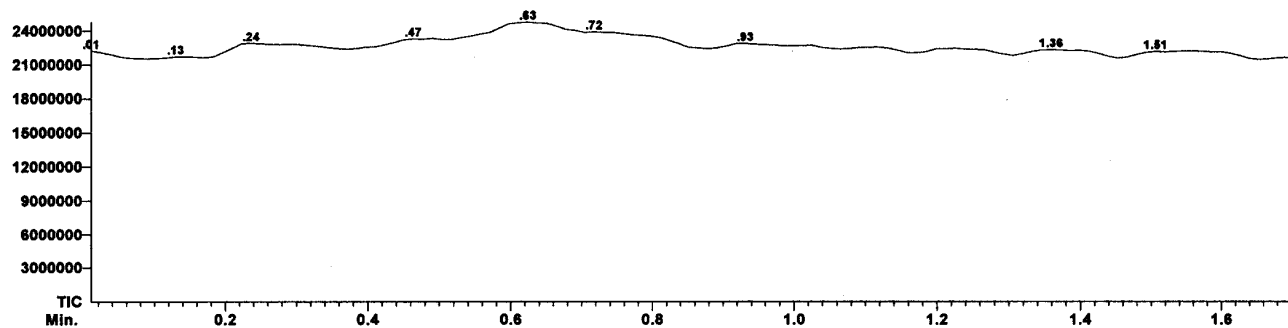

Scan: 41-55

R.T.: .64

Base: m/z 419; 5%FS TIC: 1172306

#Ions: 2913

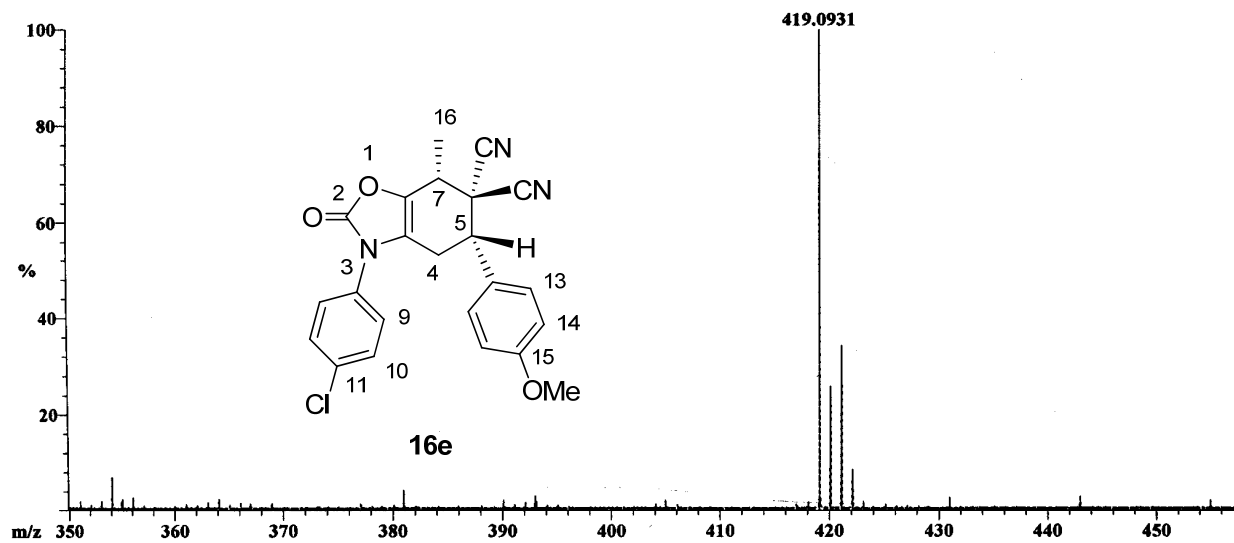Selected Isotopes : H<sub>0-20</sub>C<sub>0-25</sub>N<sub>0-4</sub>O<sub>0-4</sub>Cl<sub>0-2</sub>

Error Limit : 1 mmu

| <u>Measured Mass</u> | <u>% Base</u> | <u>Formula</u>                                                   | <u>Calculated Mass</u> | <u>Error</u> |
|----------------------|---------------|------------------------------------------------------------------|------------------------|--------------|
| 419.09314            | 100.0%        | C <sub>24</sub> H <sub>18</sub> N <sub>4</sub> O <sub>4</sub> Cl | 419.09243              | 0.7          |

HRMS 16e

S150

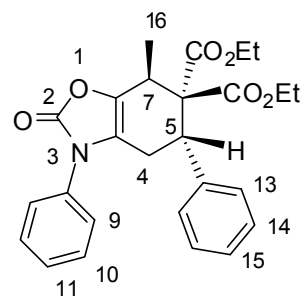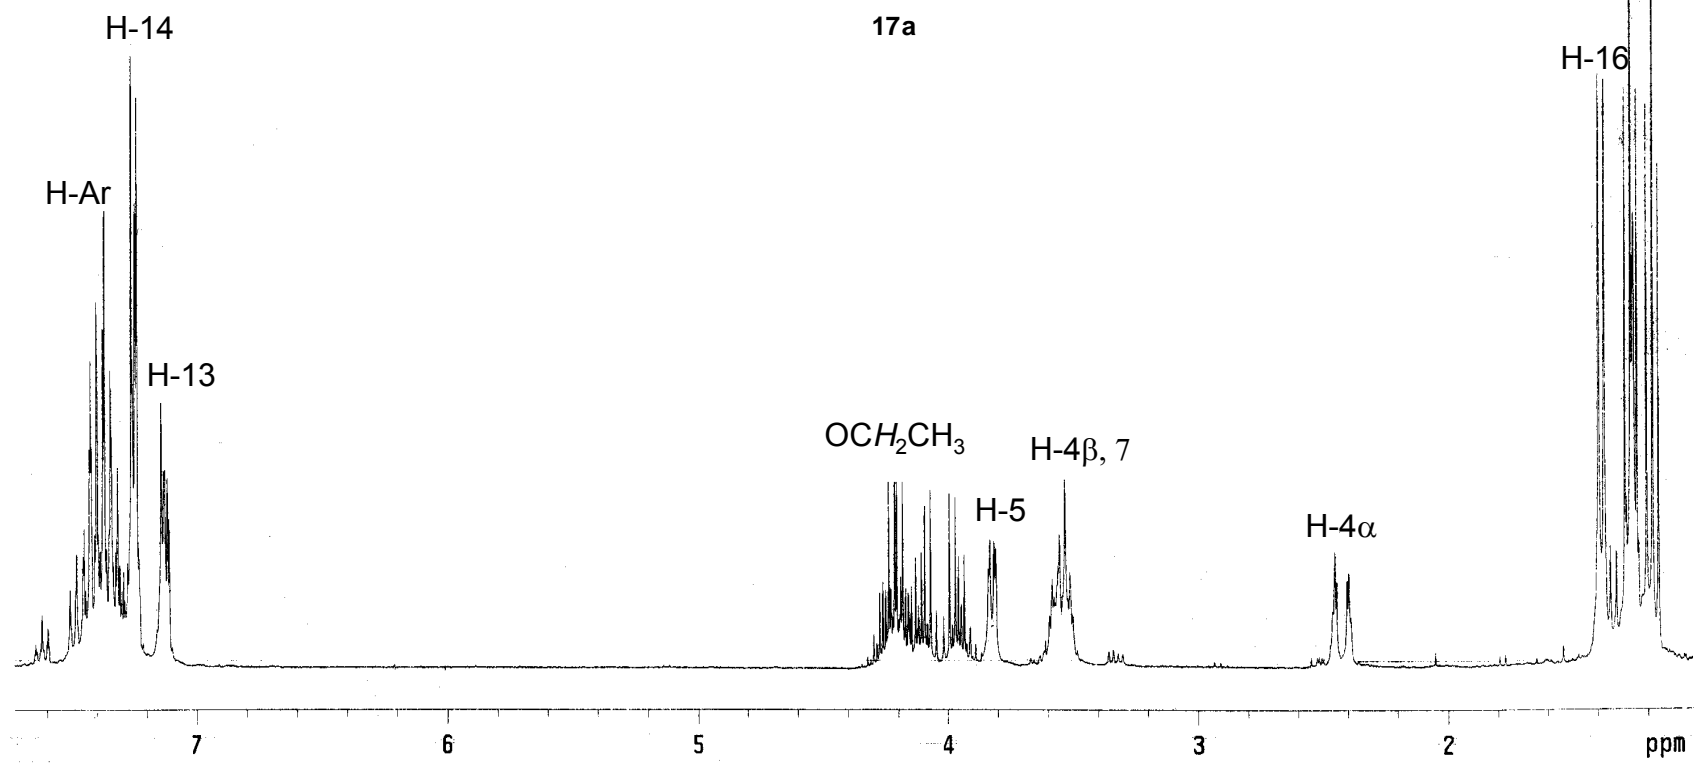

<sup>1</sup>H NMR (CDCl<sub>3</sub>) 17a

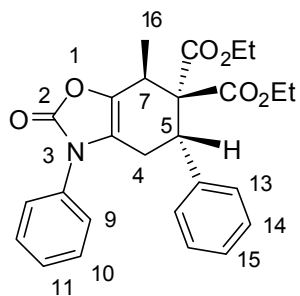

17a

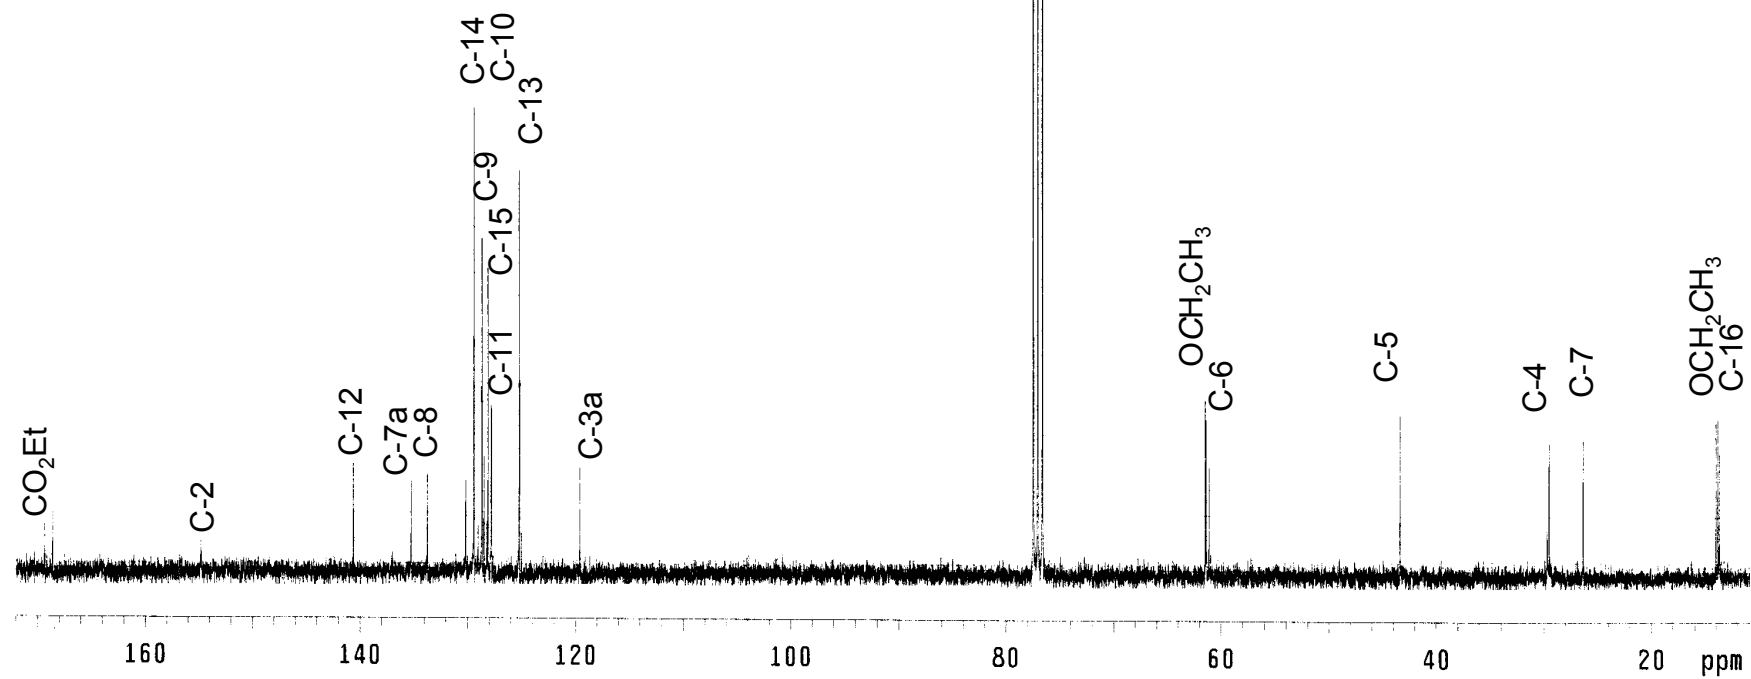



S152

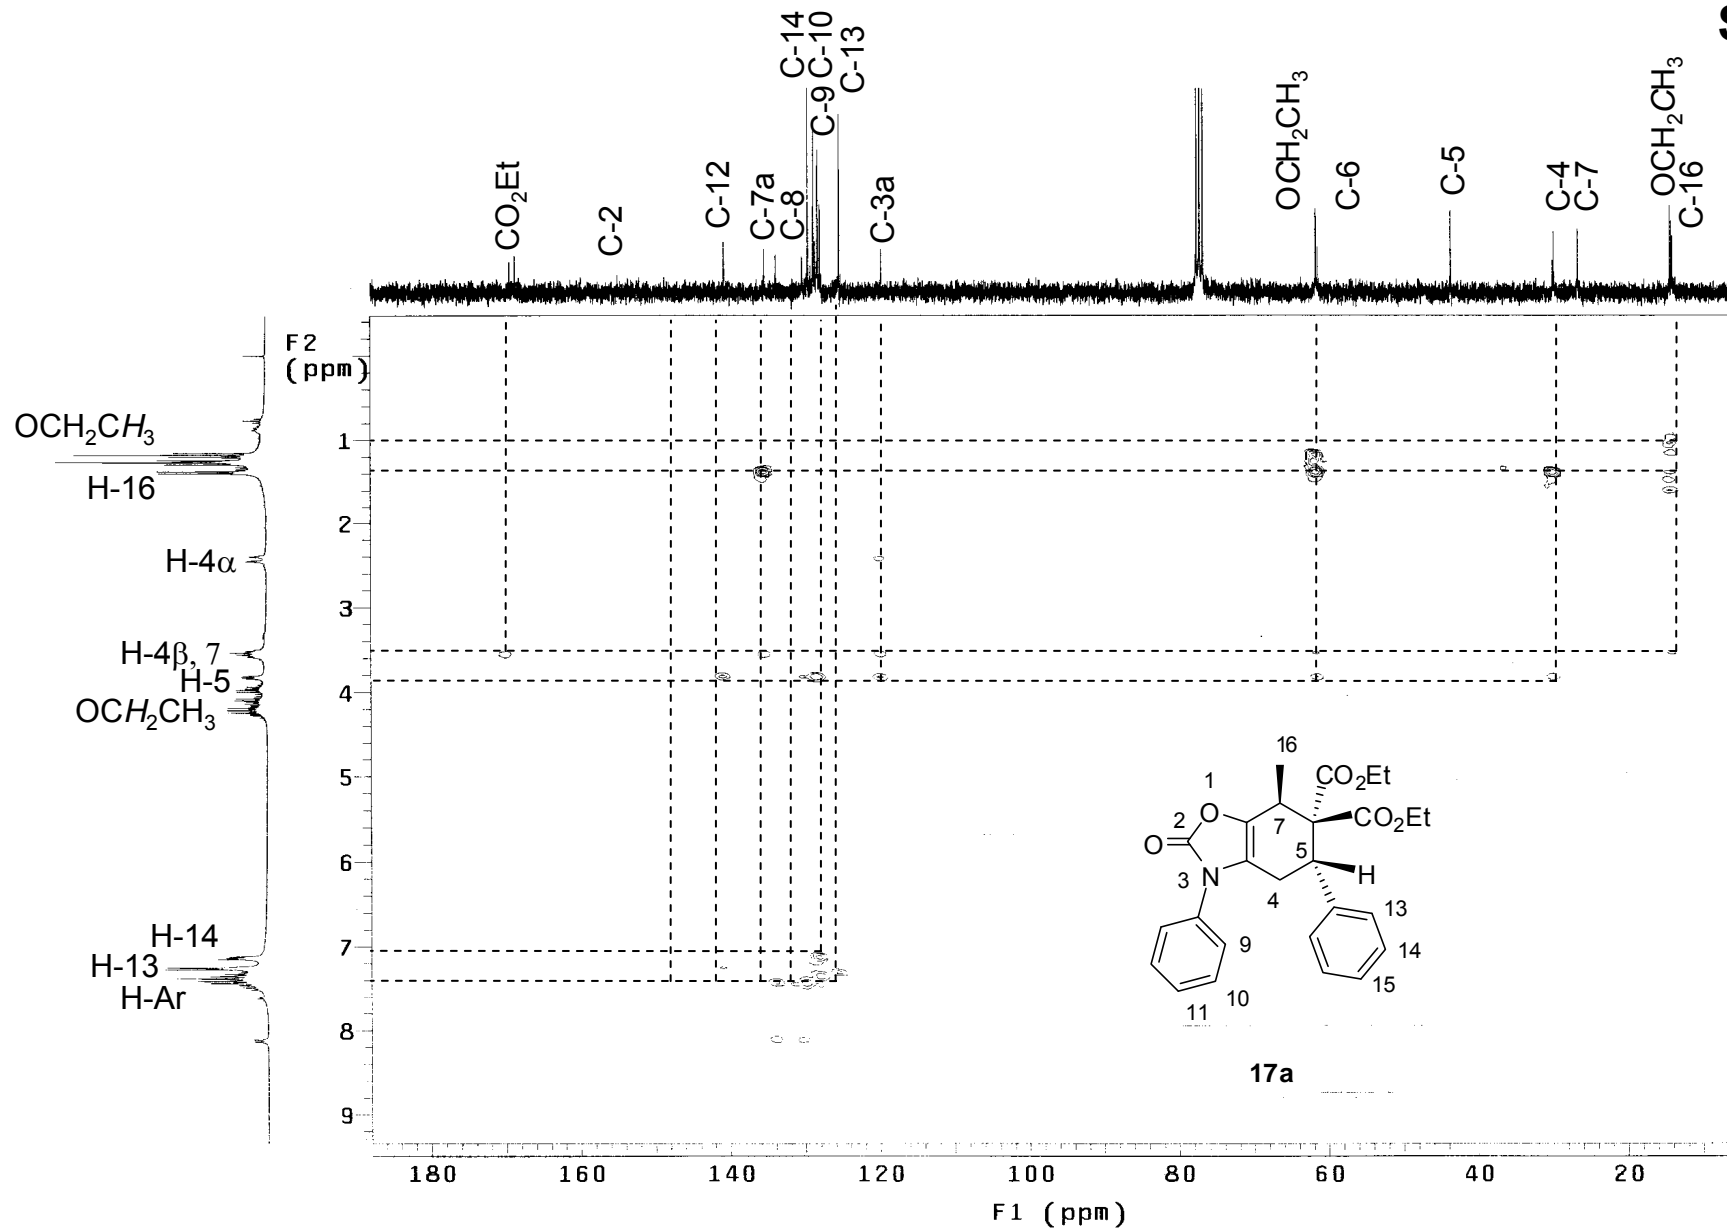

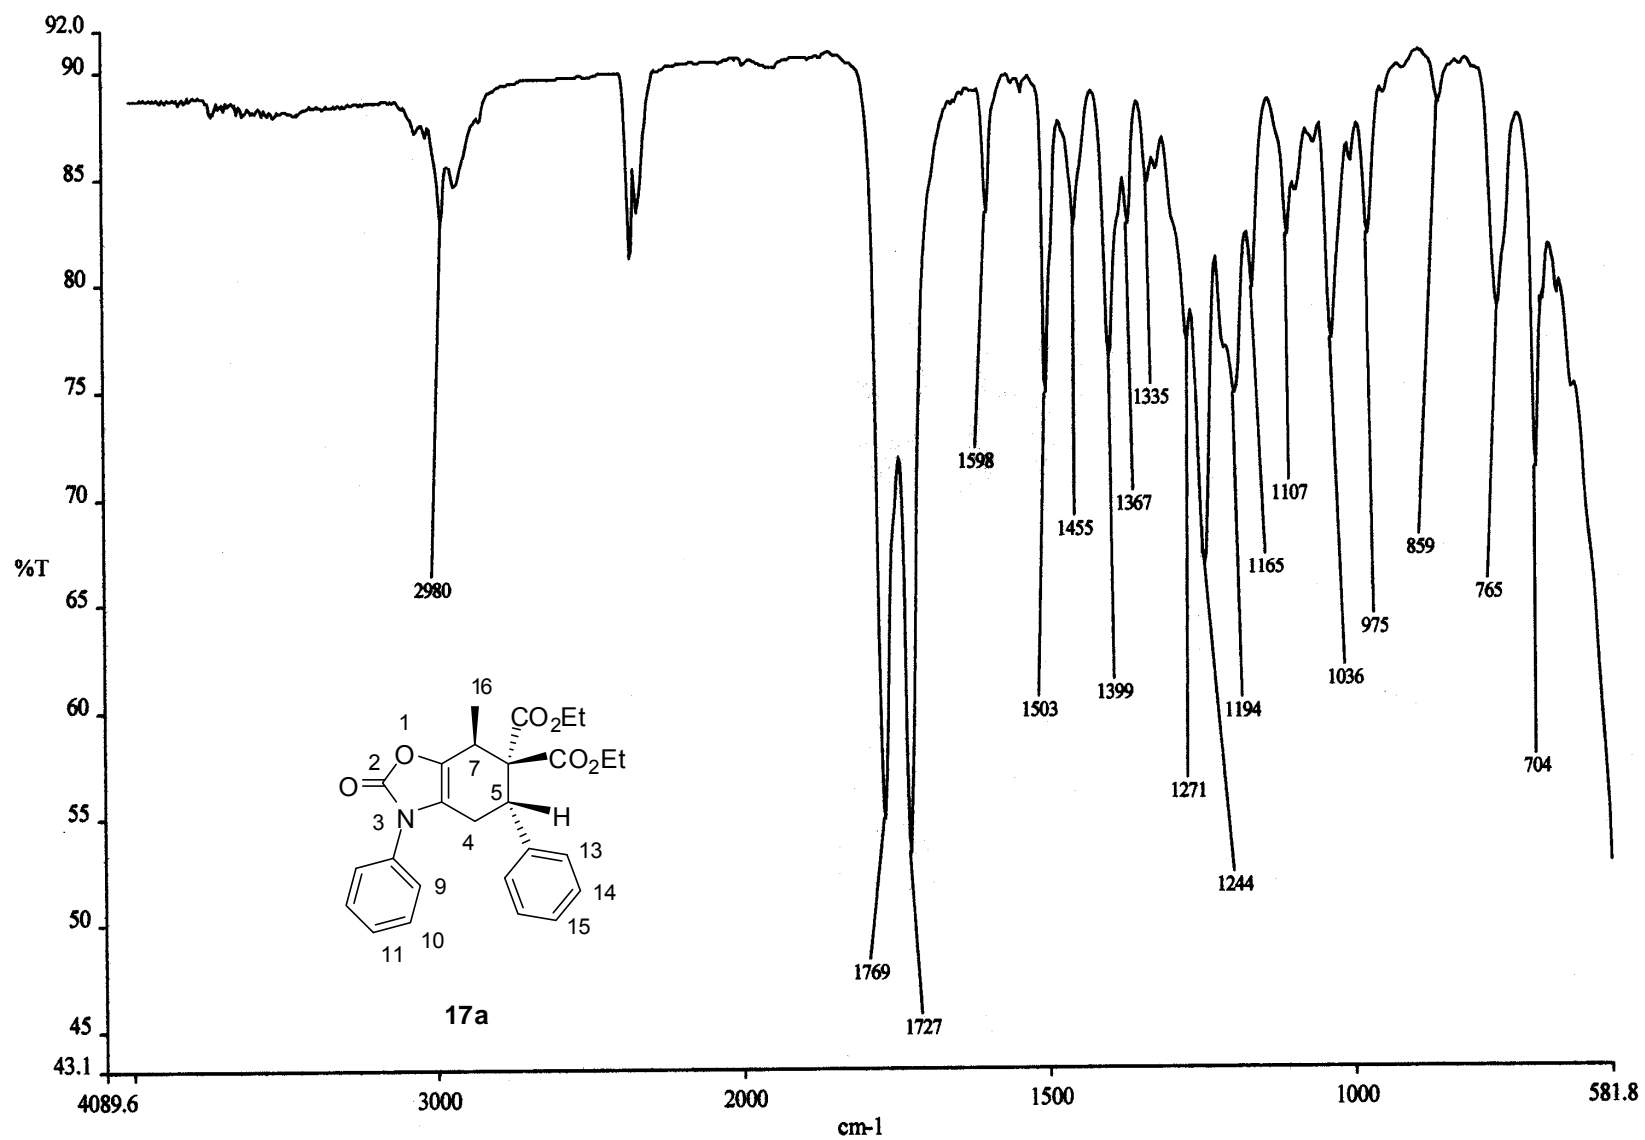

FT-IR (KBr) 17a

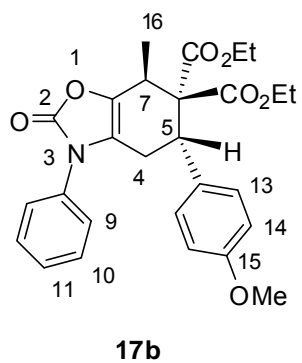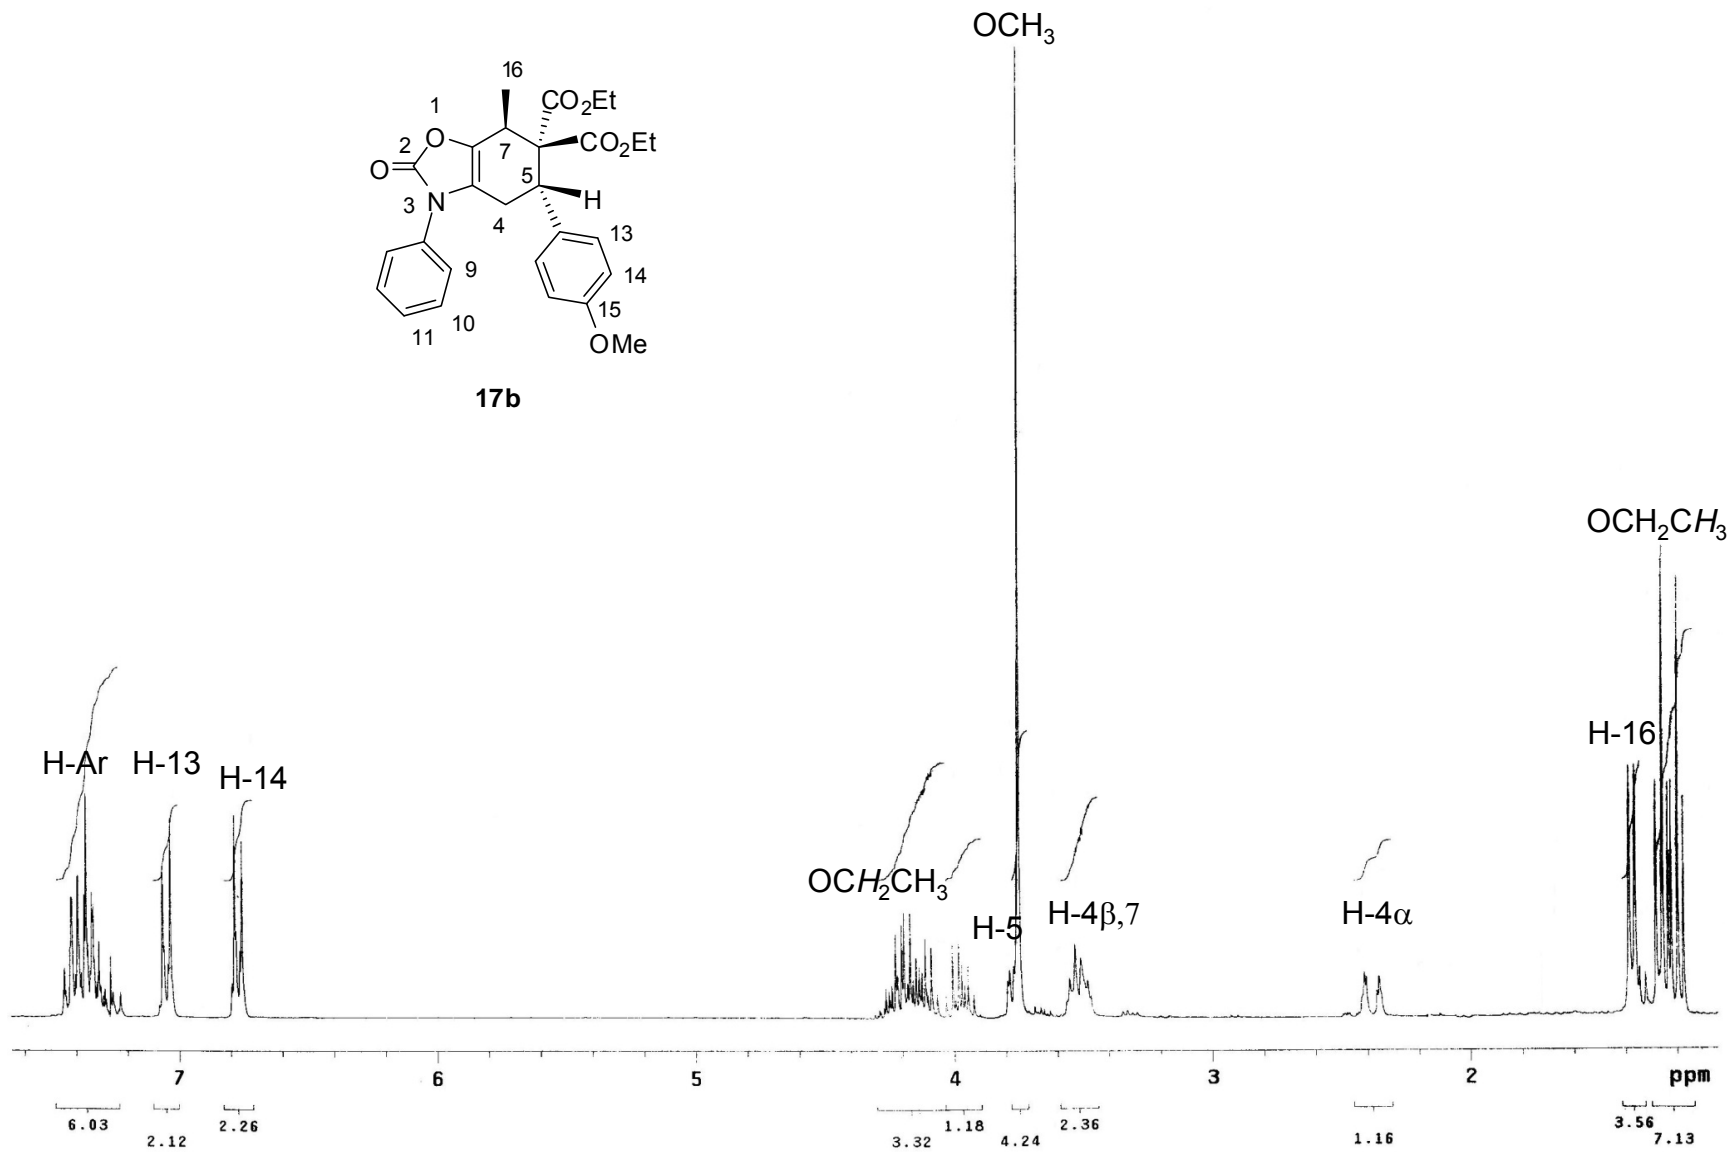

<sup>1</sup>H NMR (CDCl<sub>3</sub>) **17b**

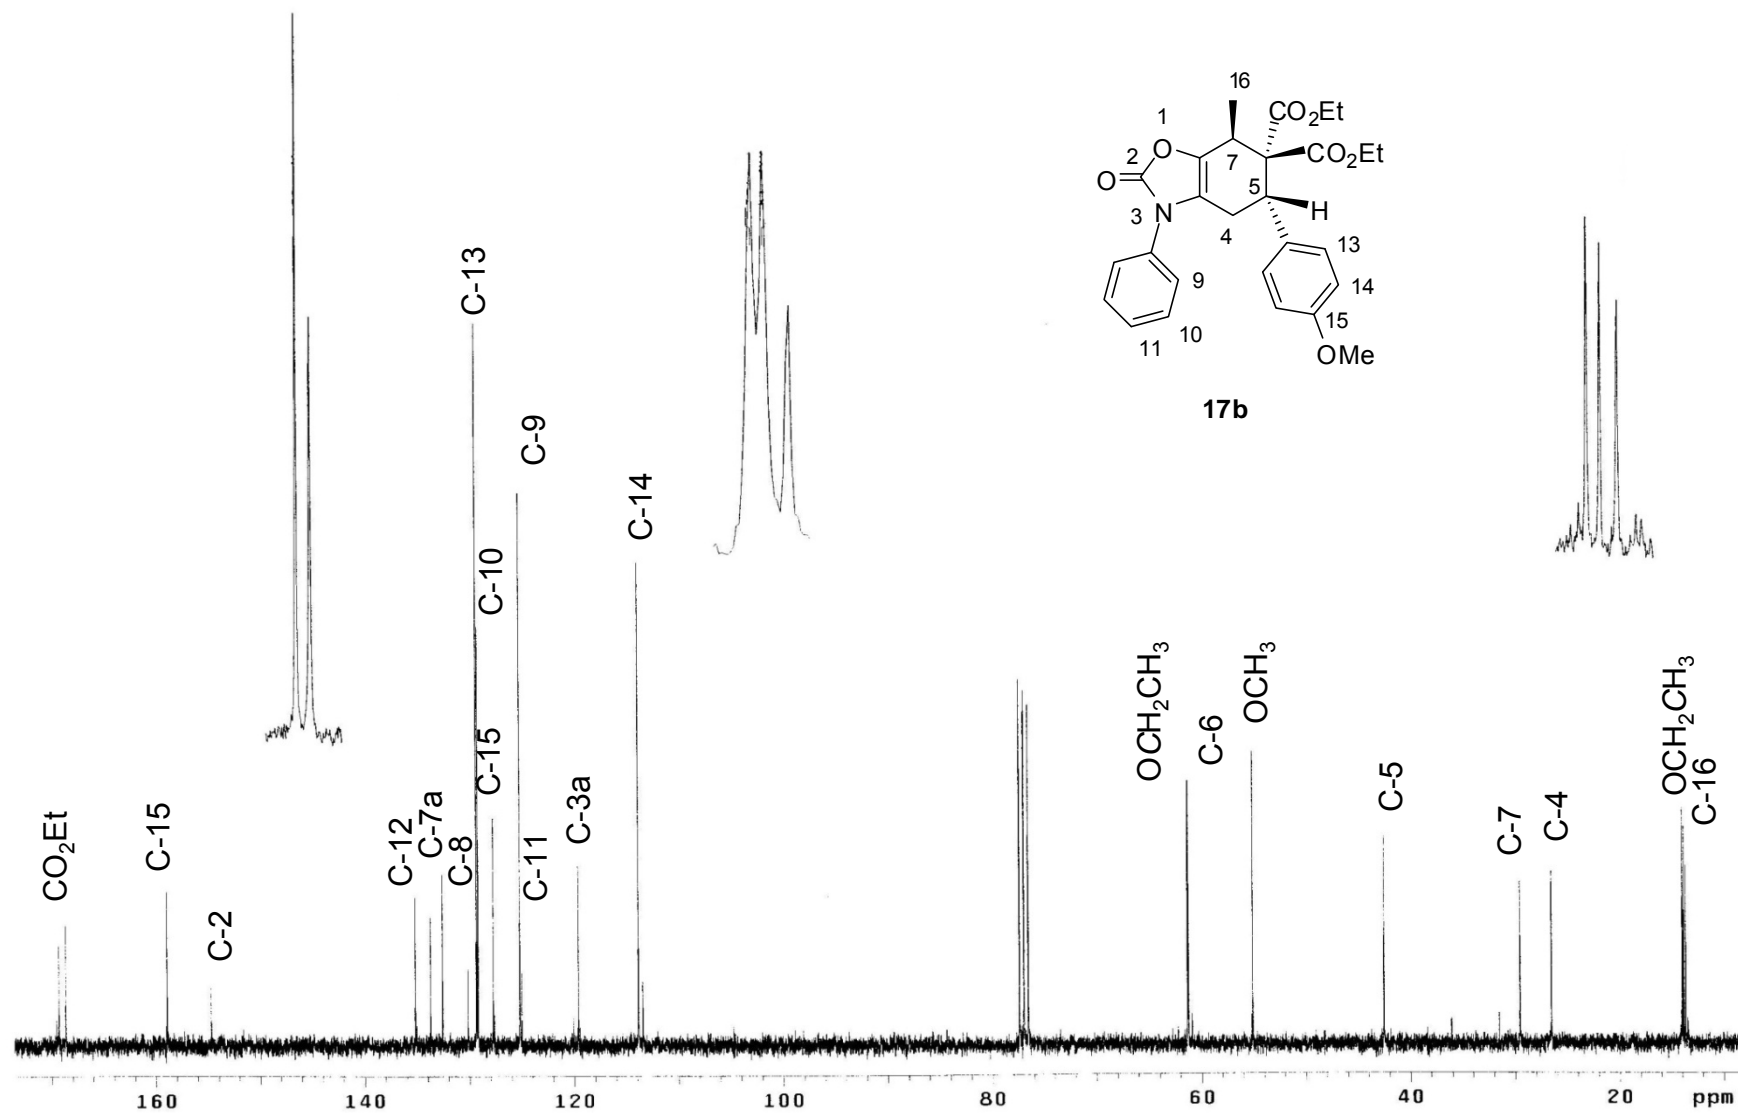

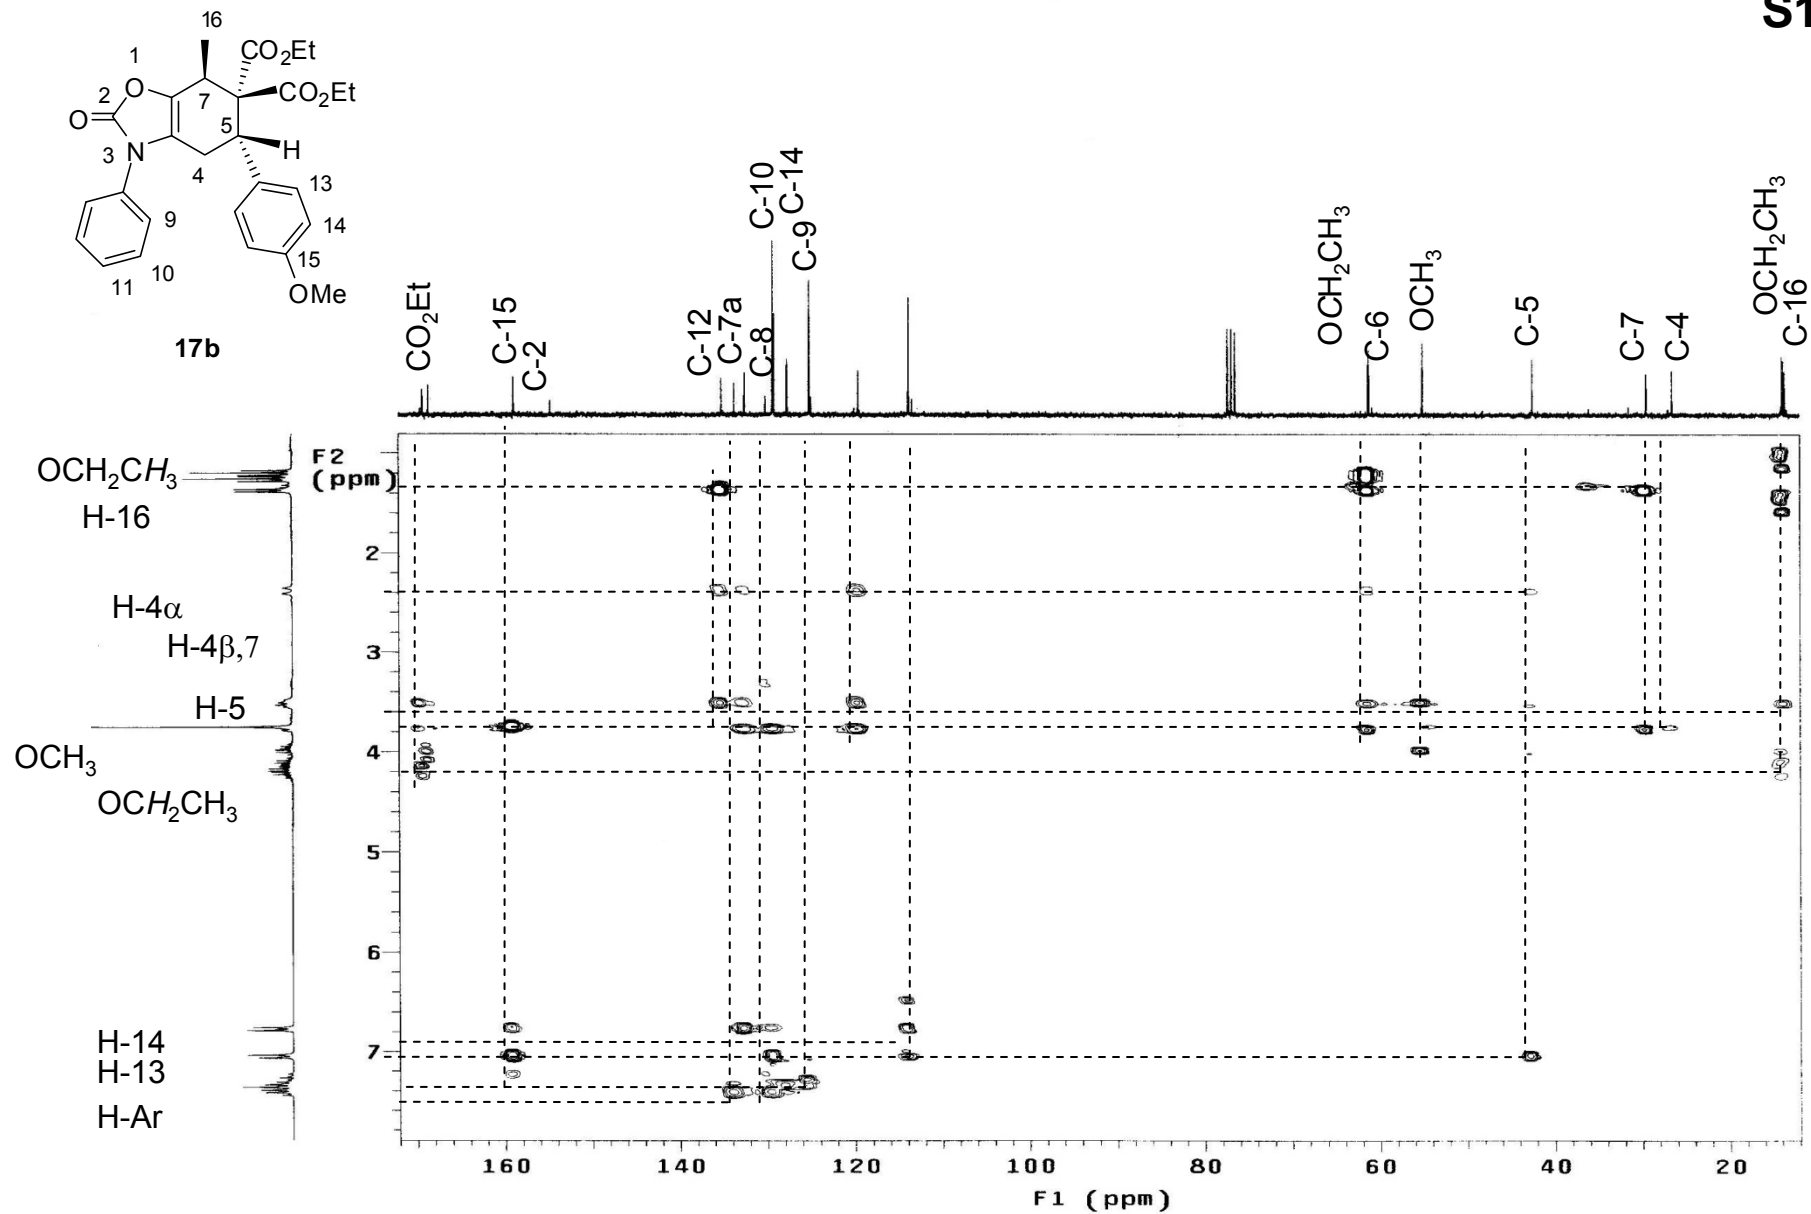HMBC experiment (CDCl<sub>3</sub>) **17b**

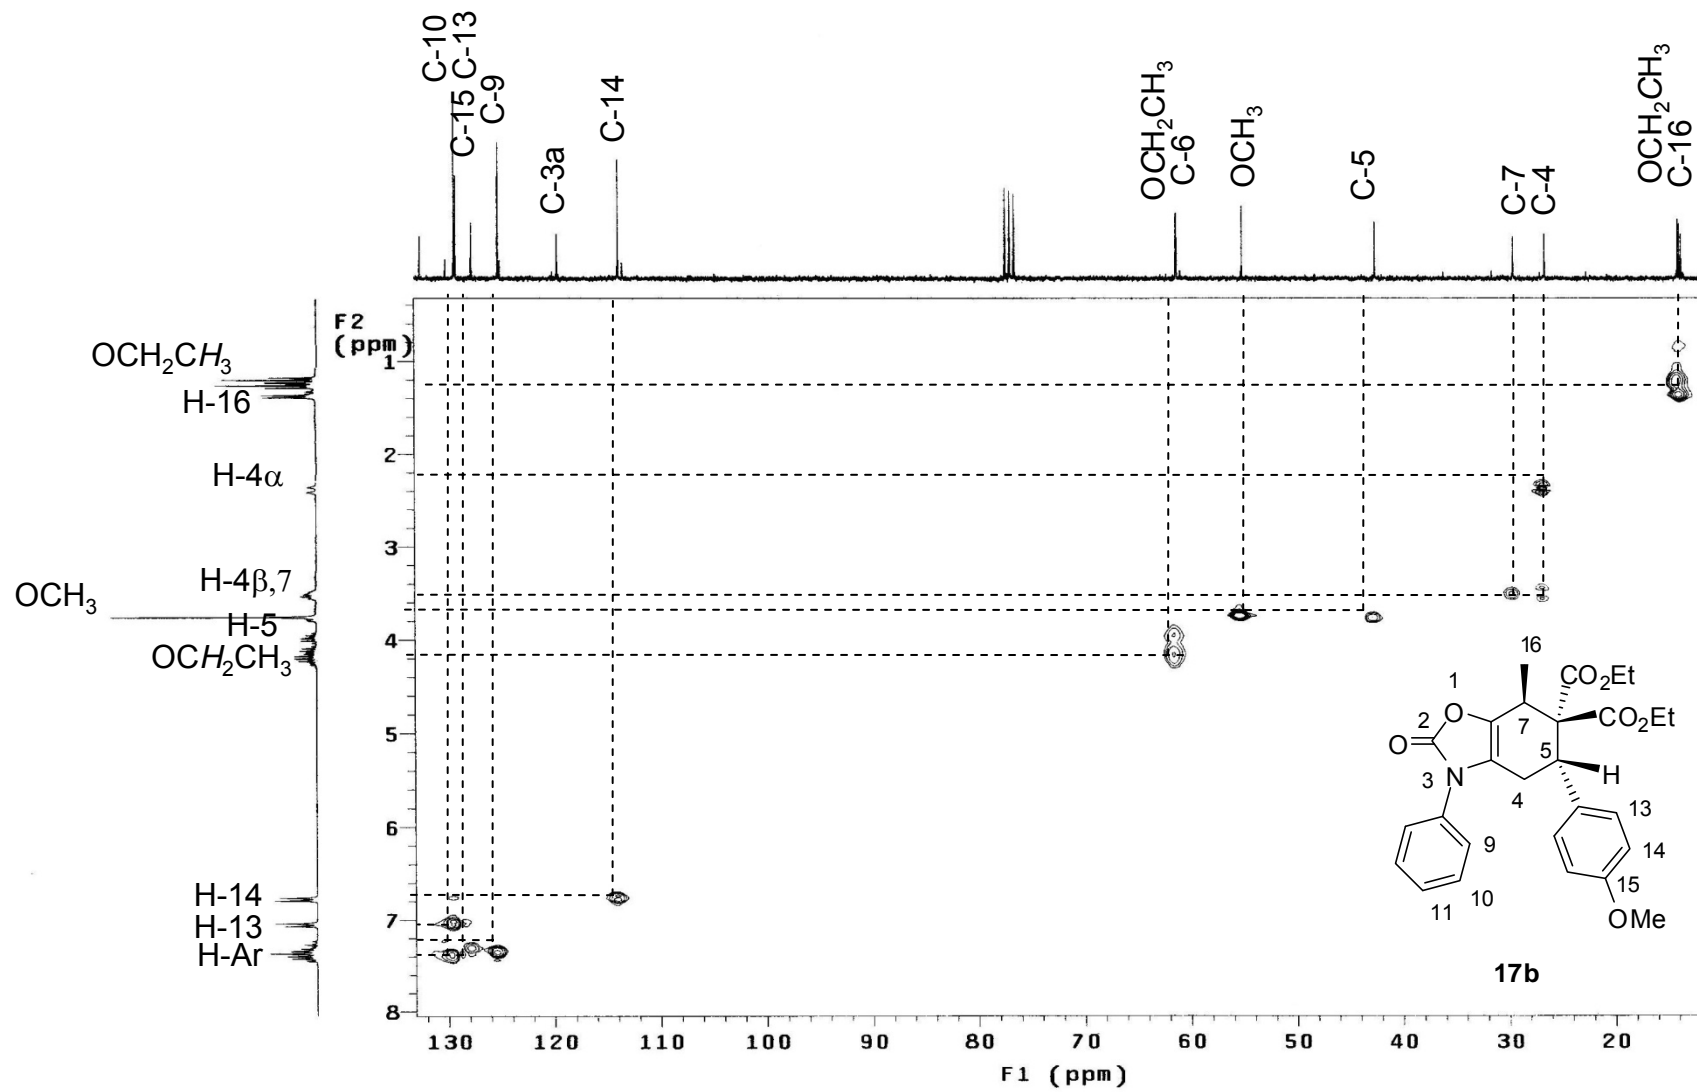

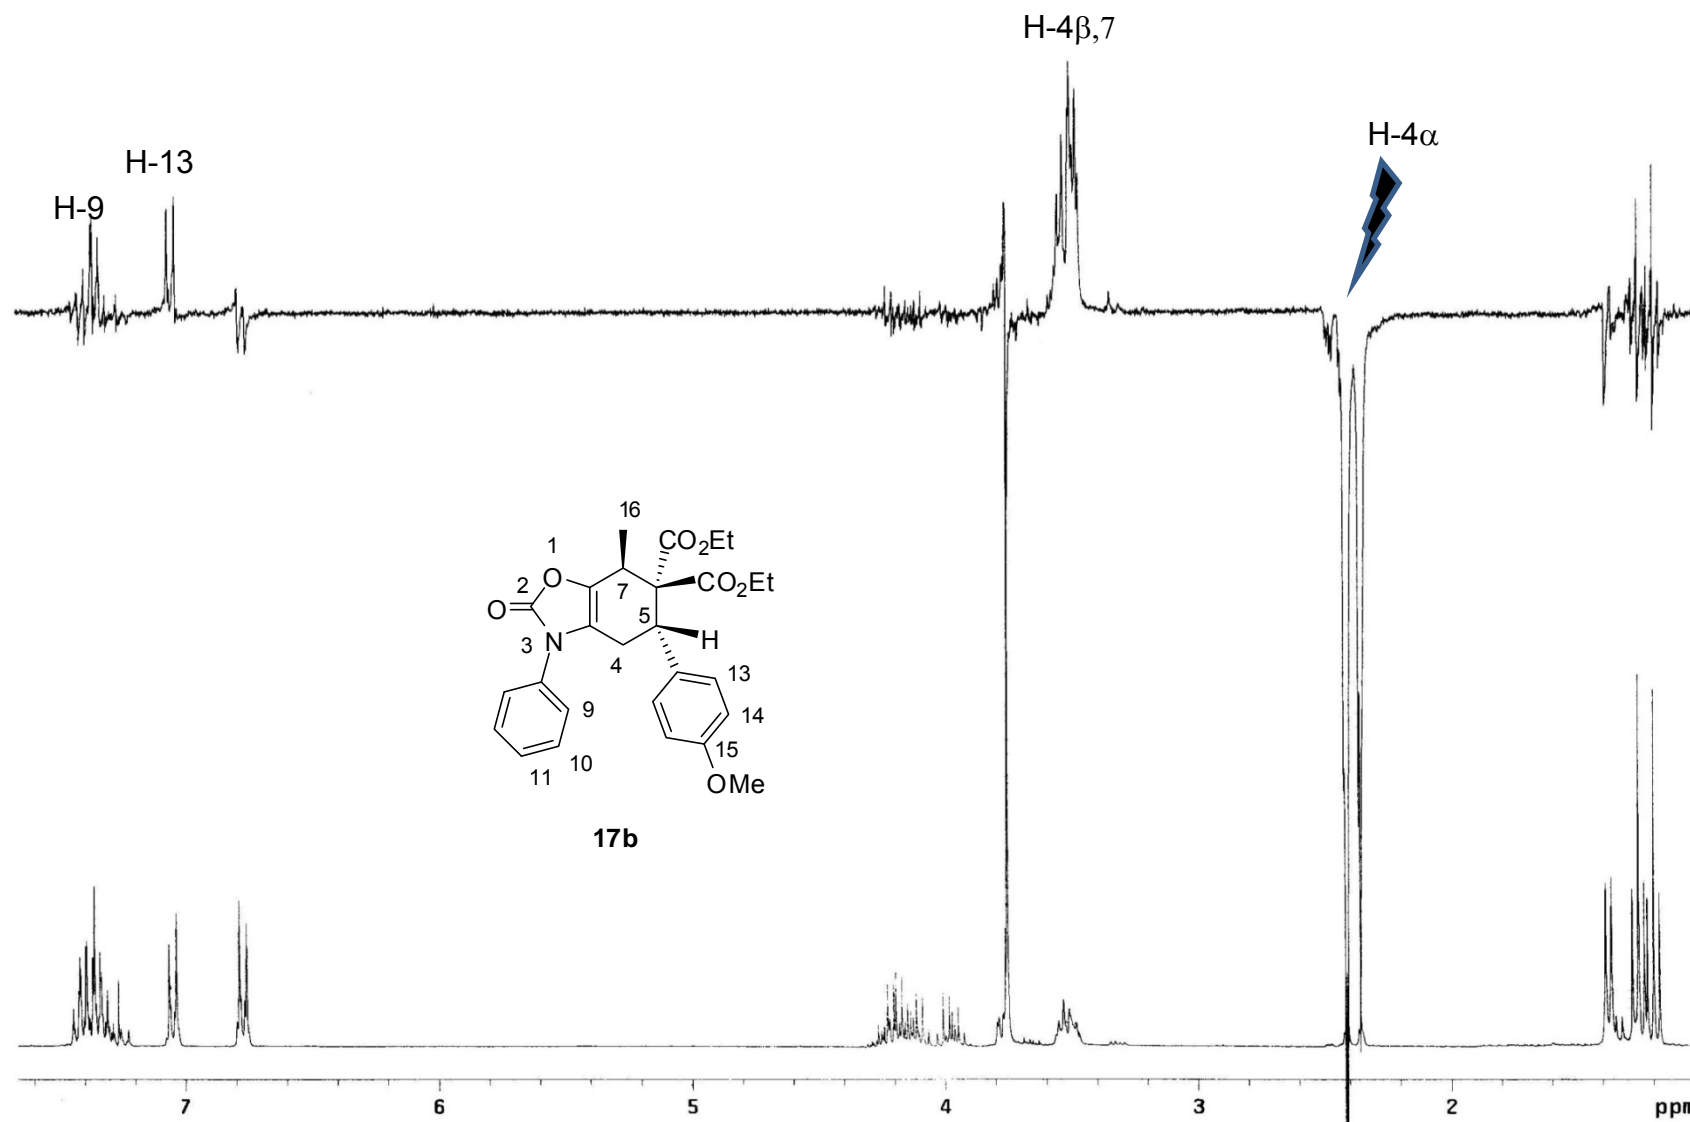

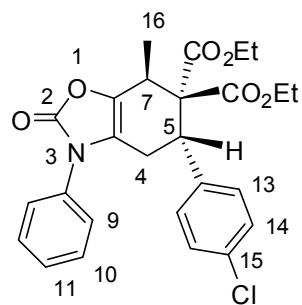**17c**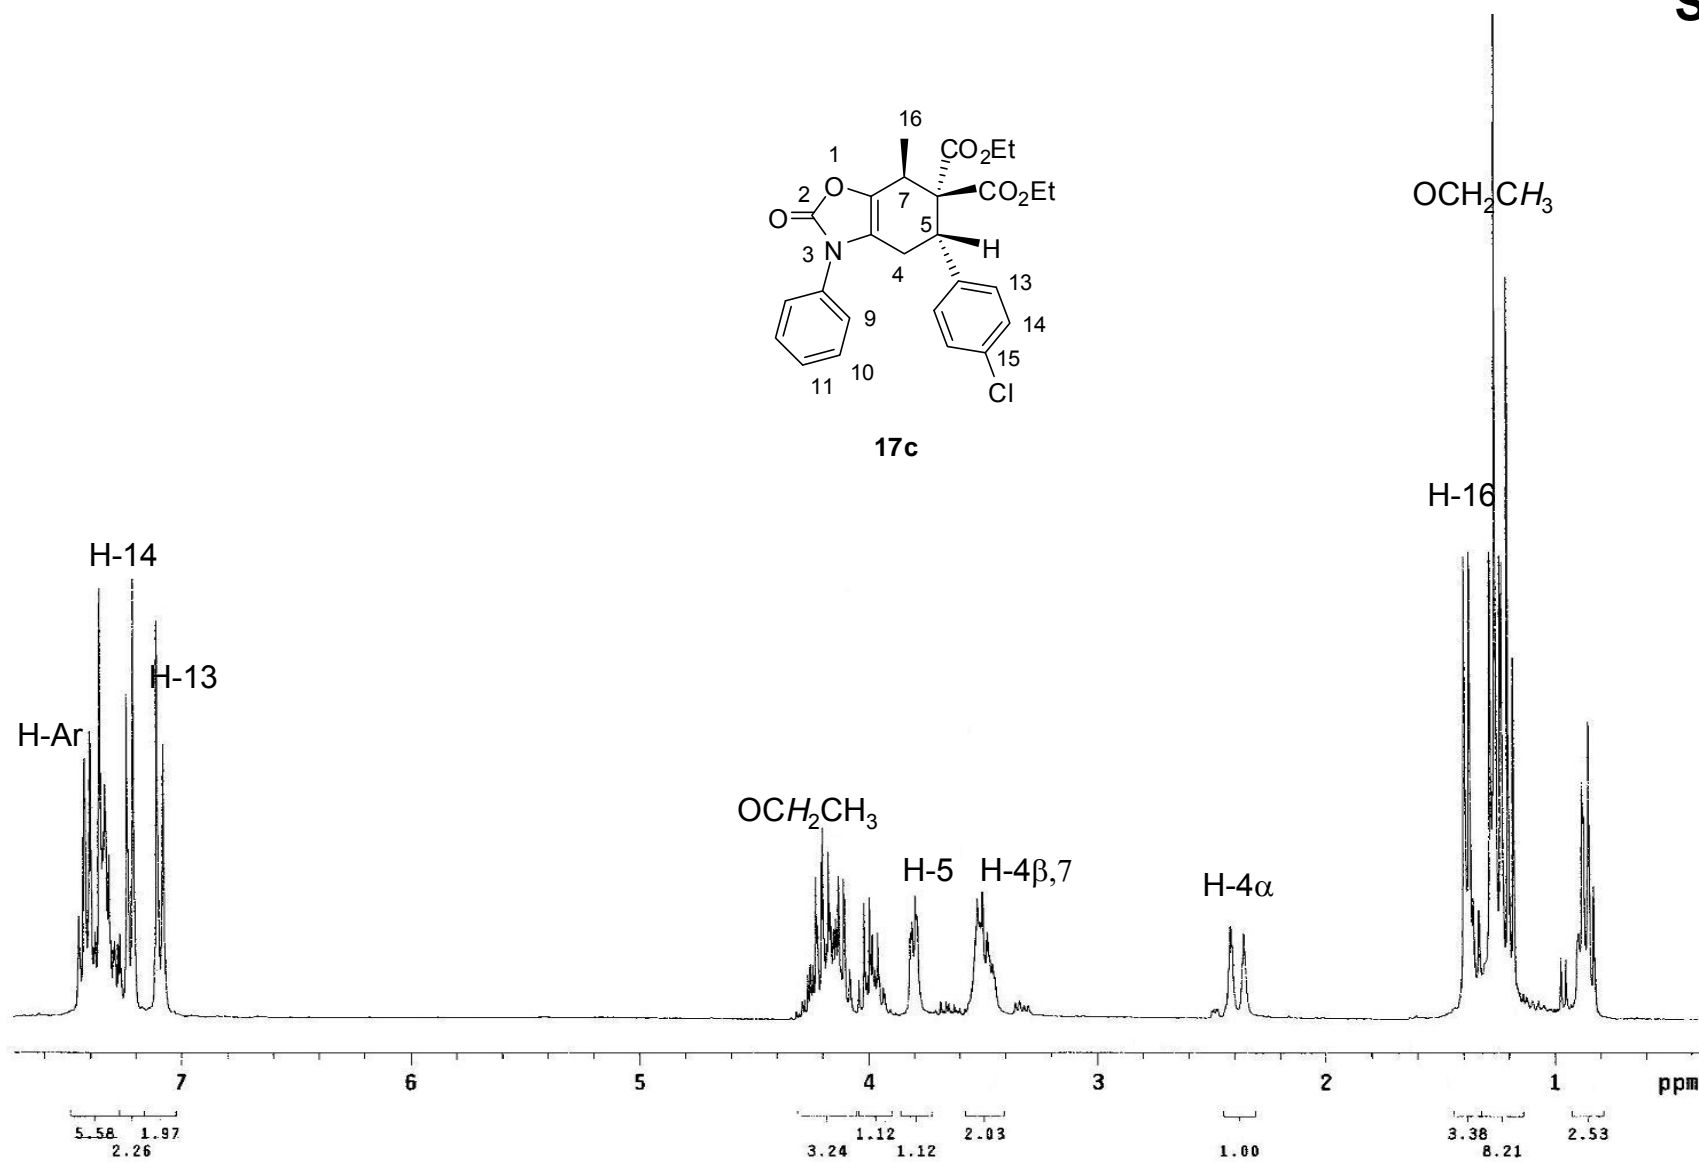 $^1\text{H}$  NMR ( $\text{CDCl}_3$ ) **17c**



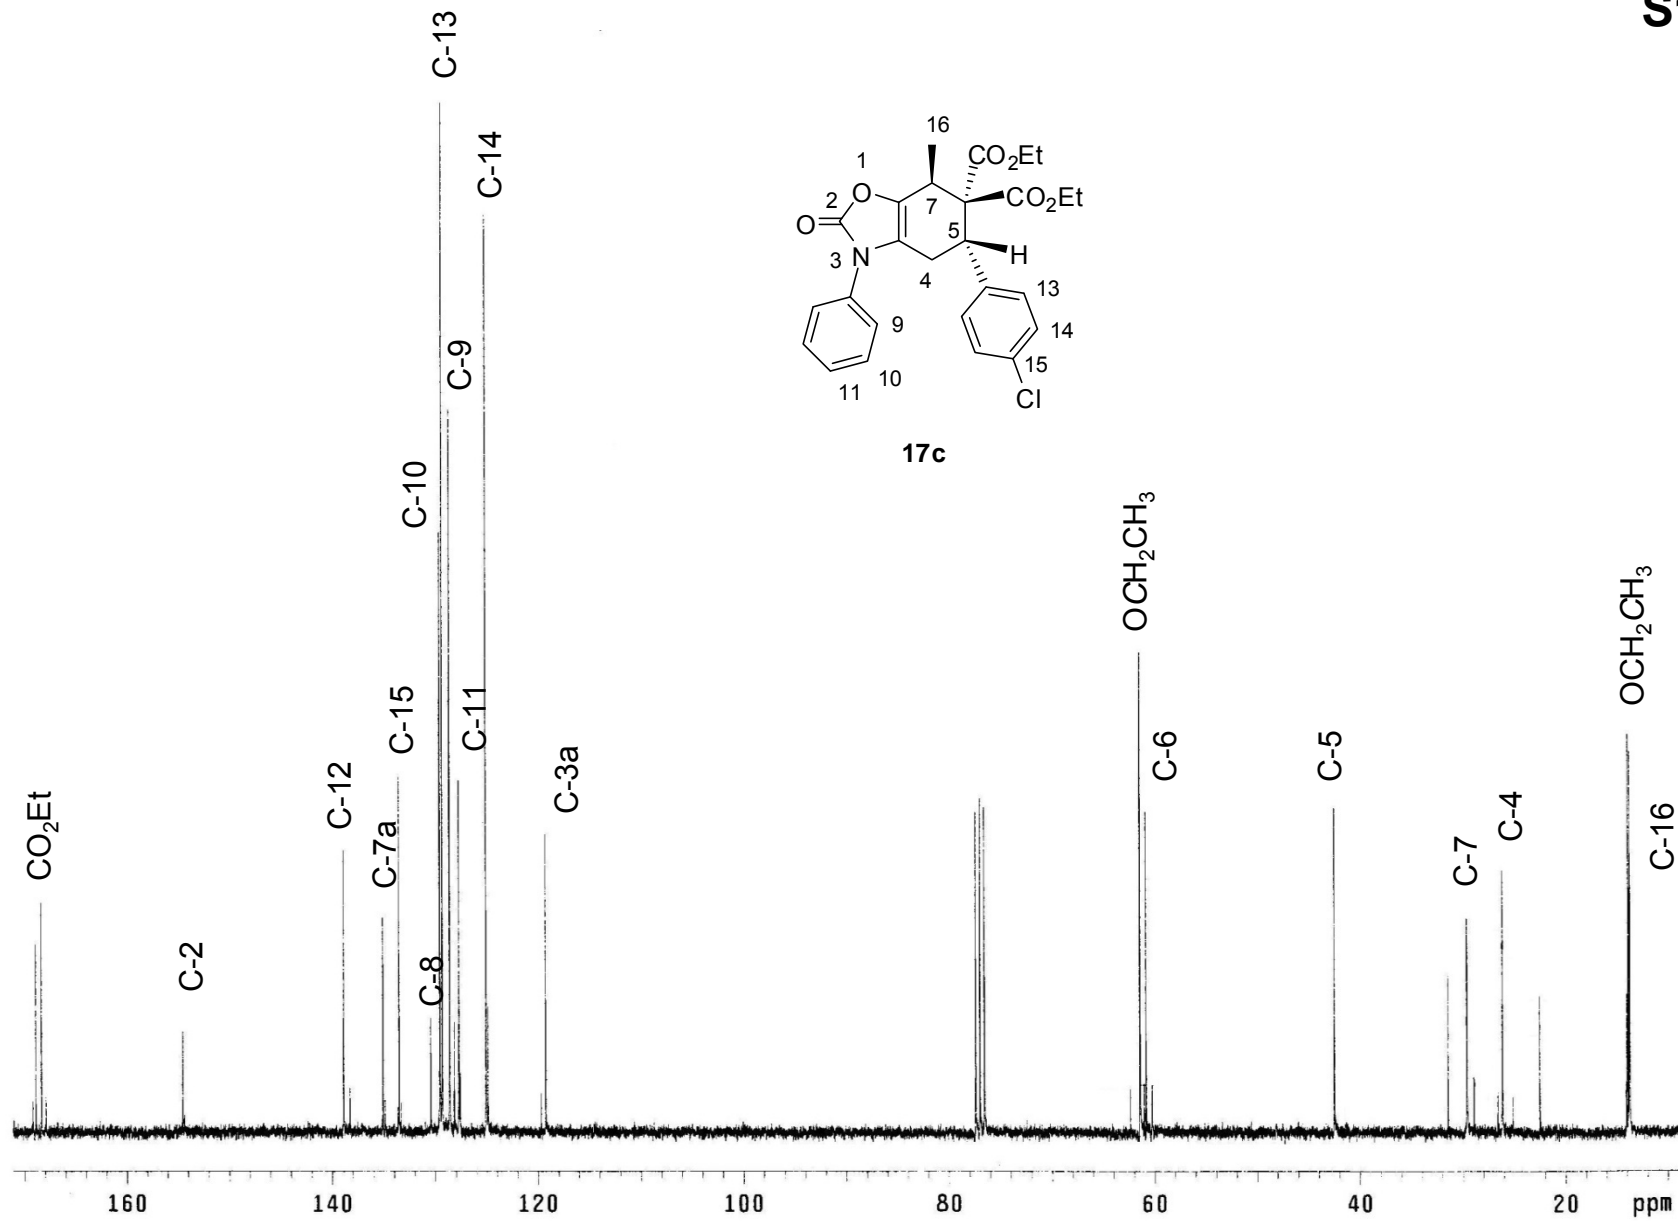<sup>13</sup>C NMR (CDCl<sub>3</sub>) 17c

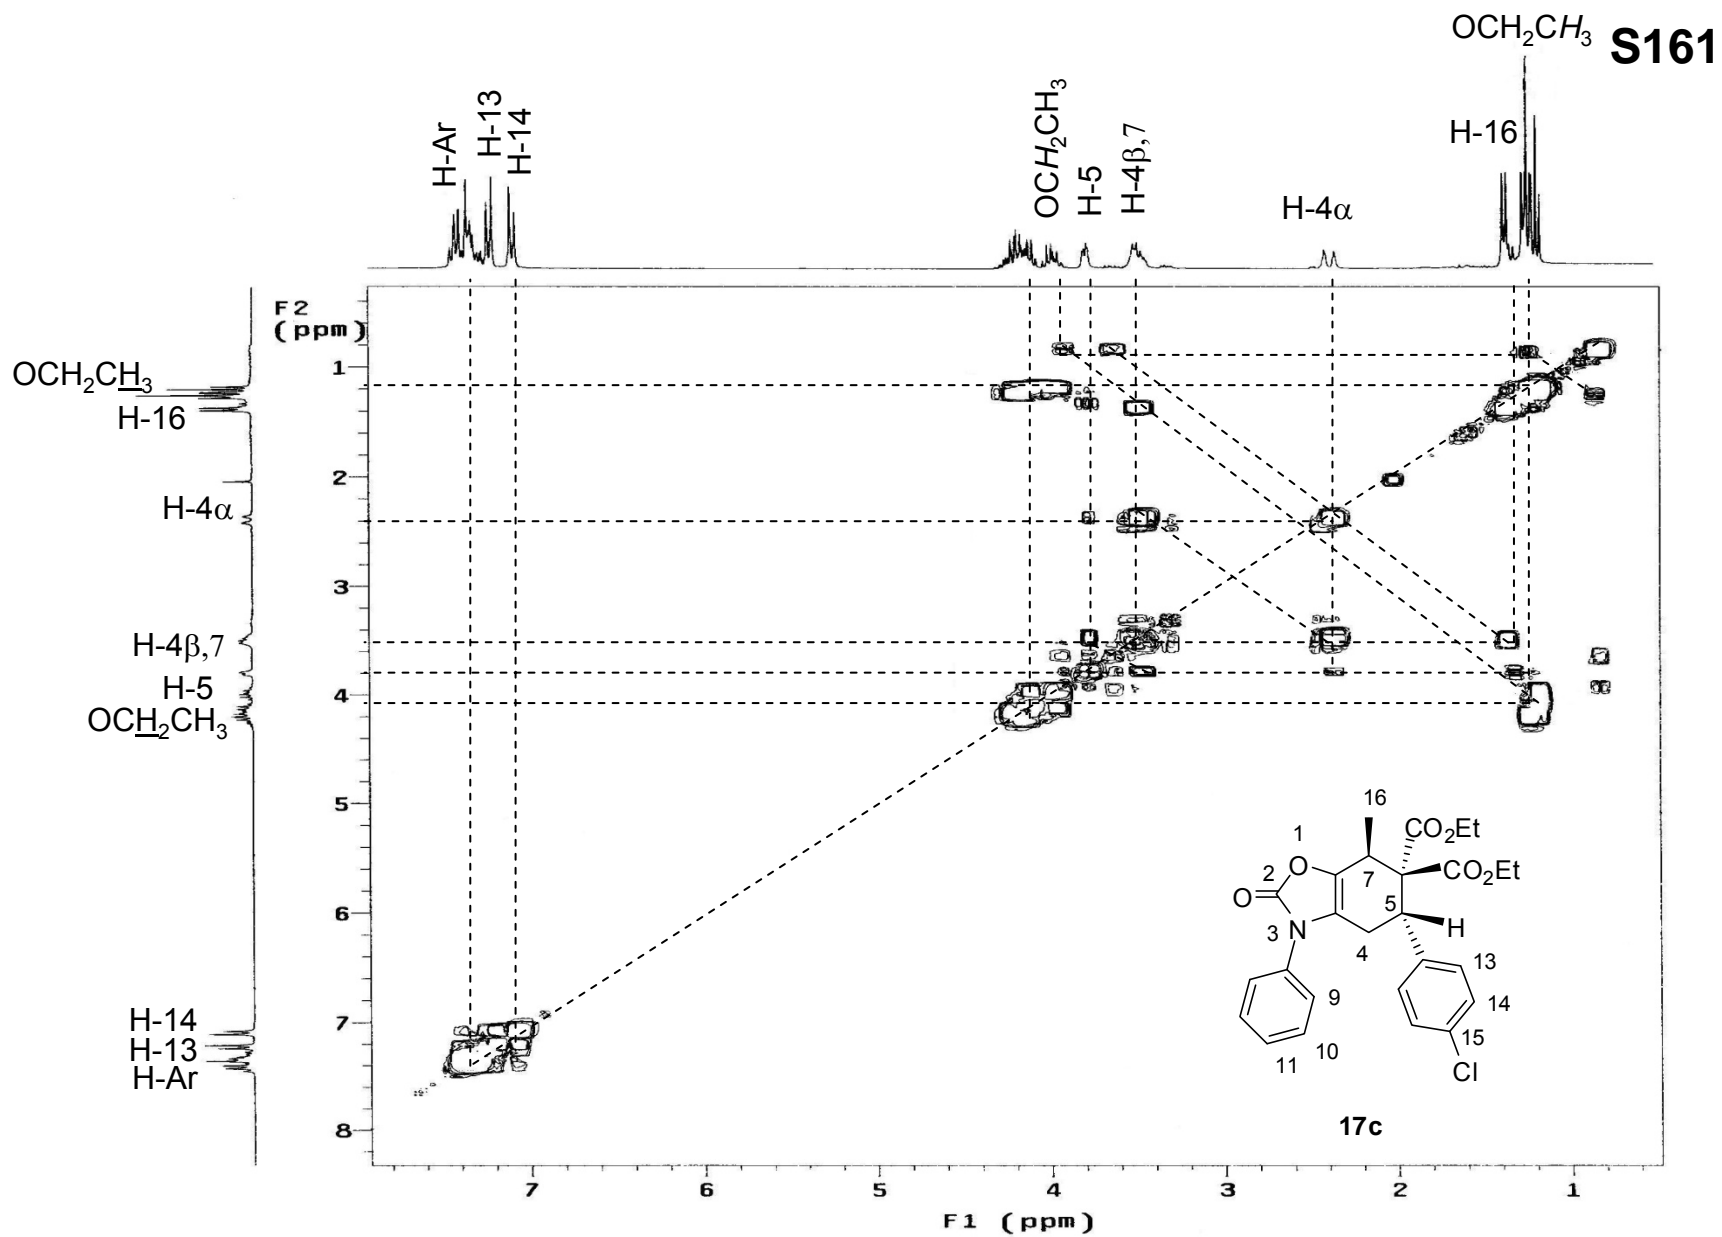

COSY experiment (CDCl<sub>3</sub>) **17c**

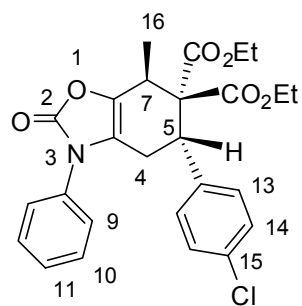

17c

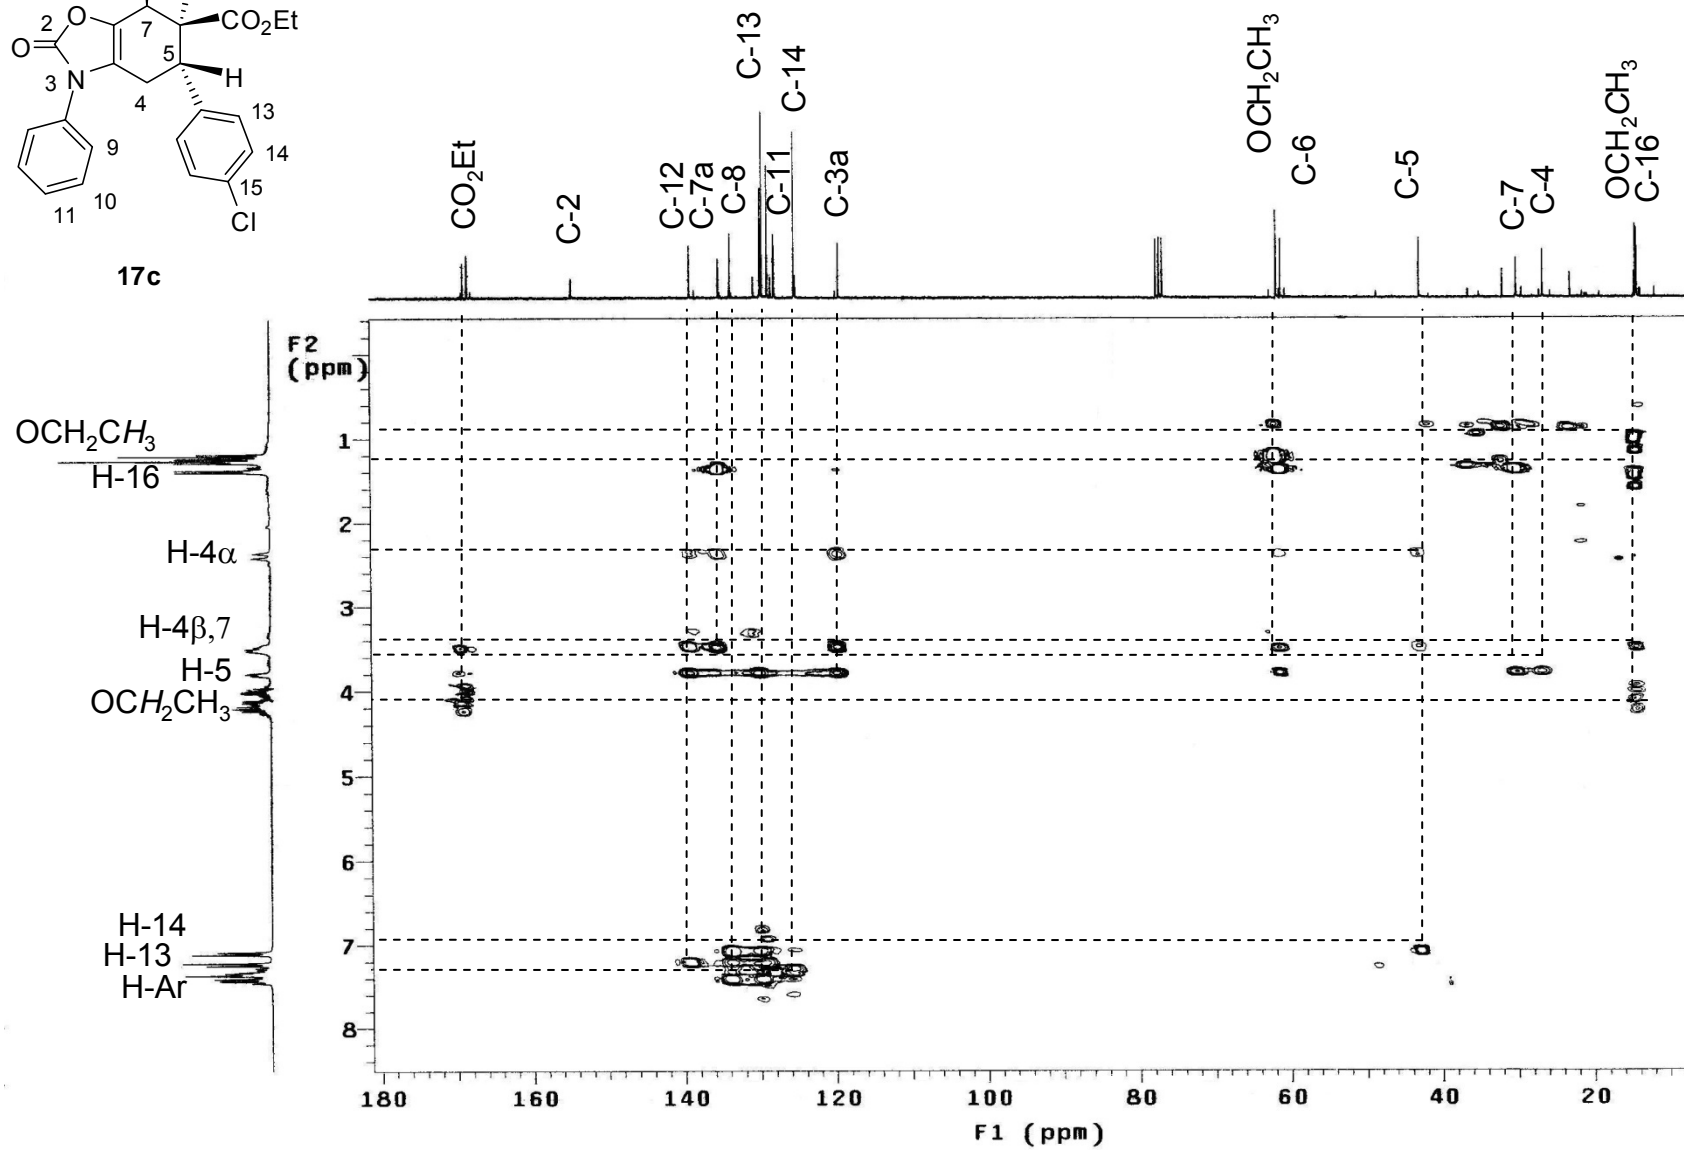

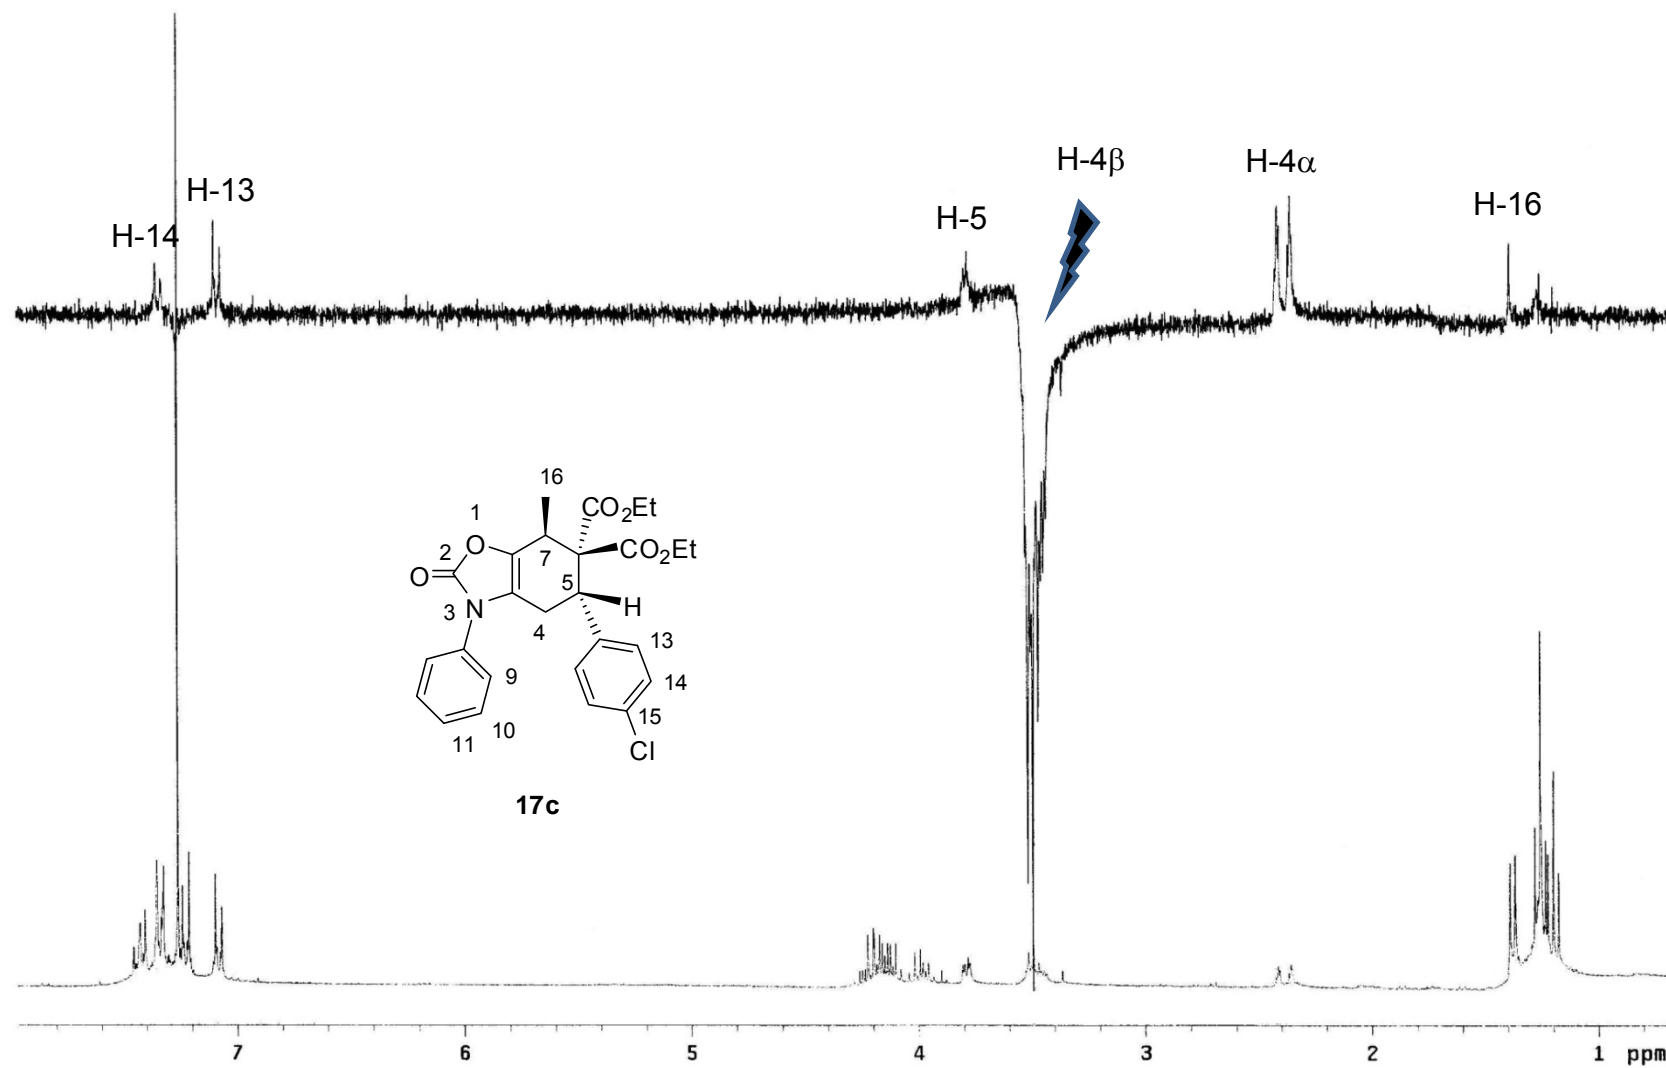NOE experiment (CDCl<sub>3</sub>) **17c**

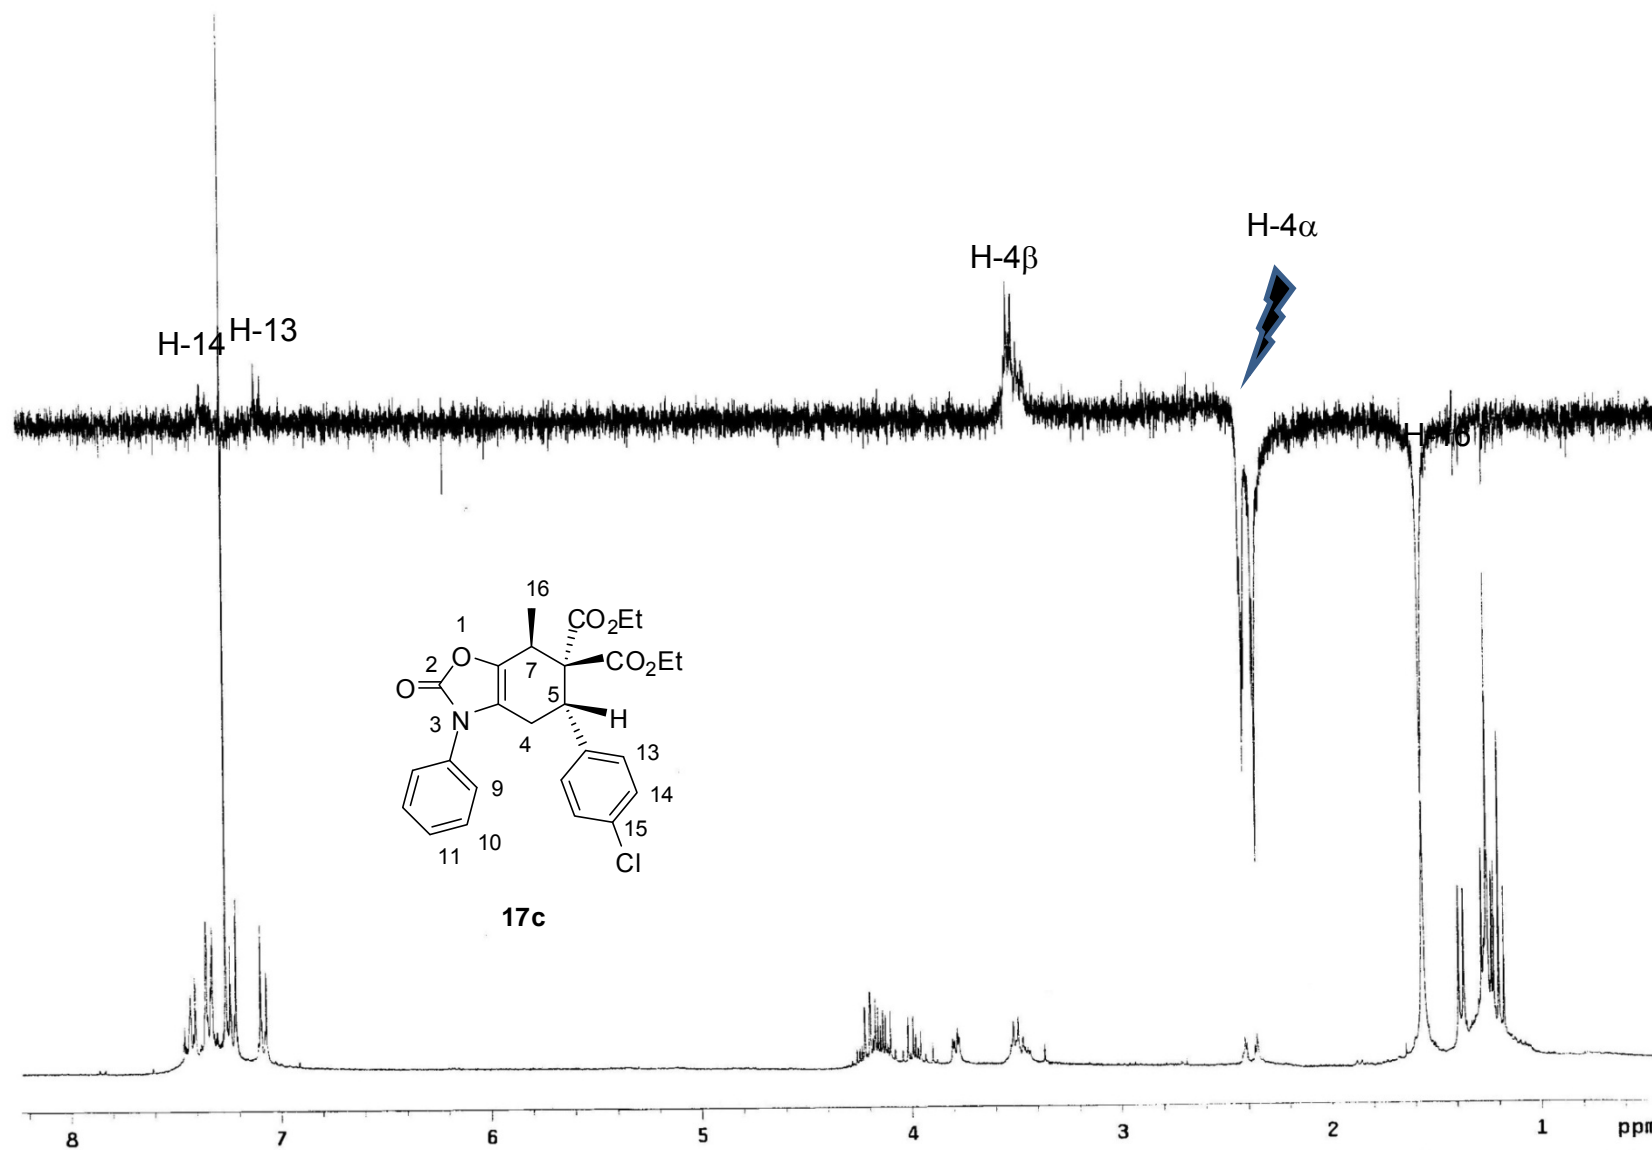

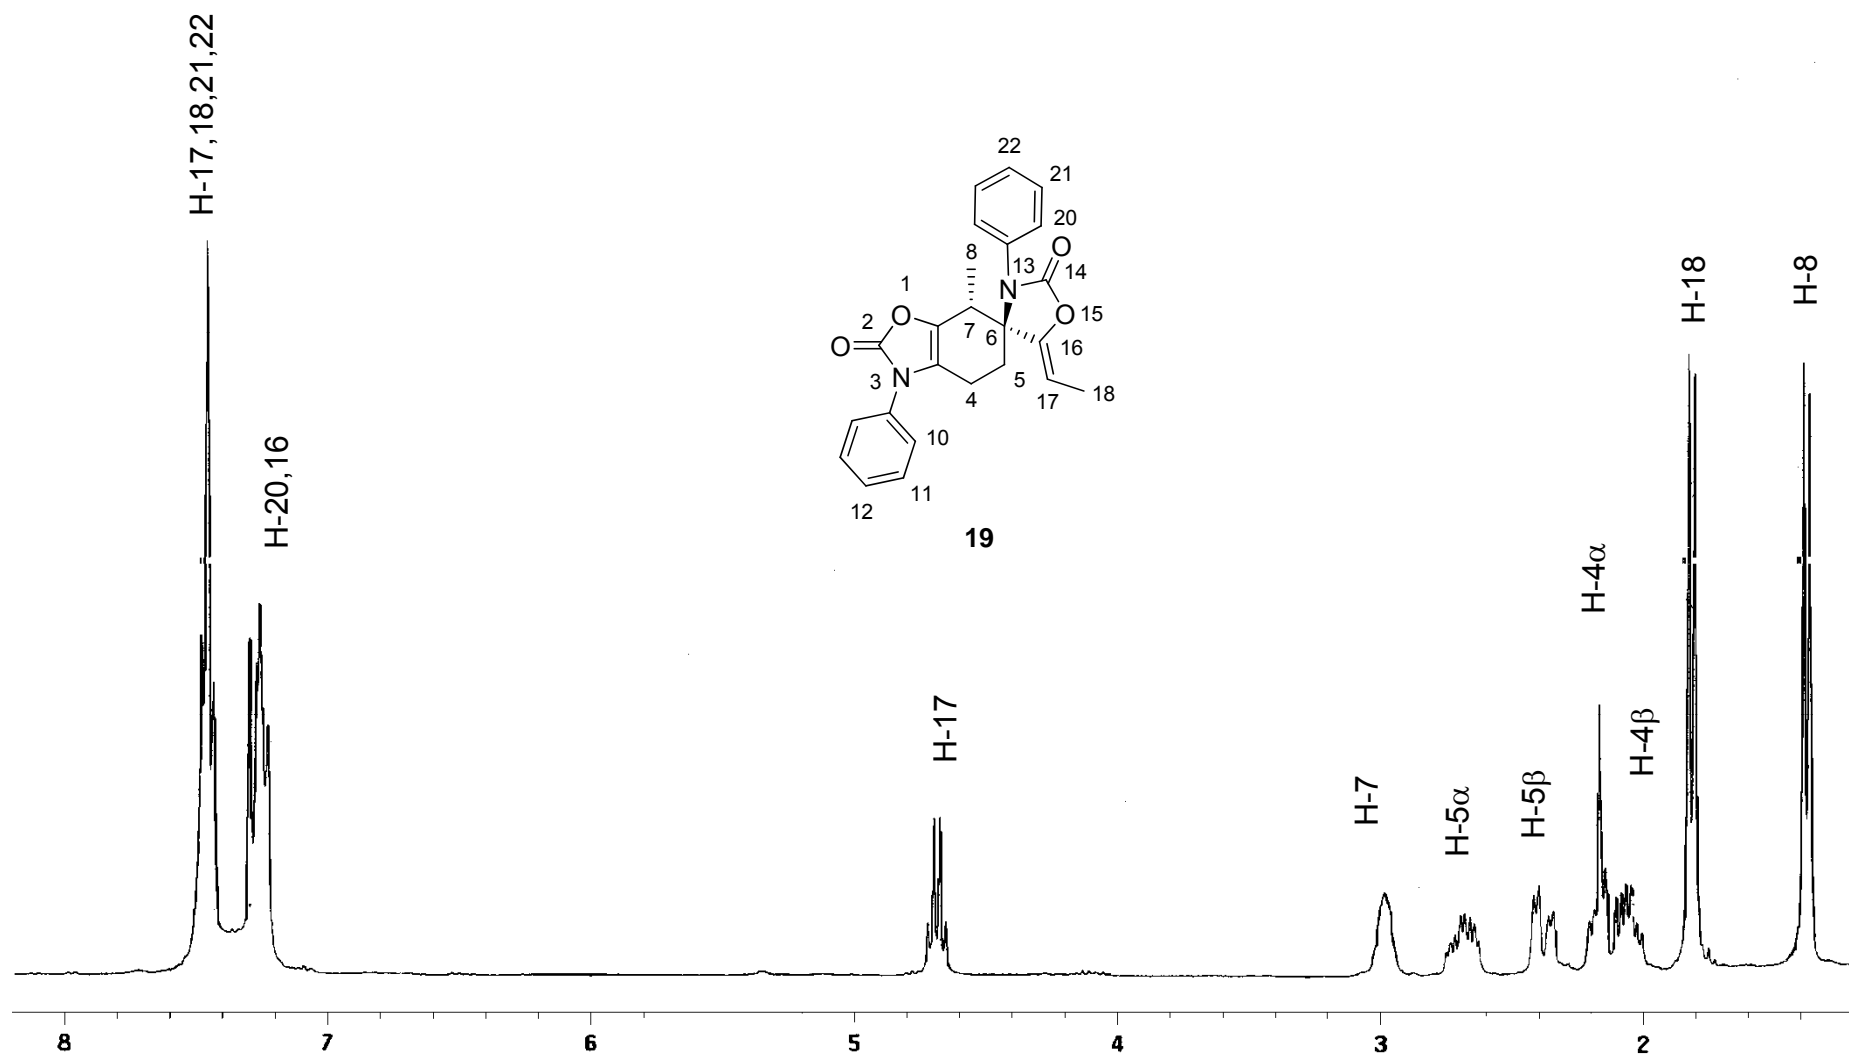

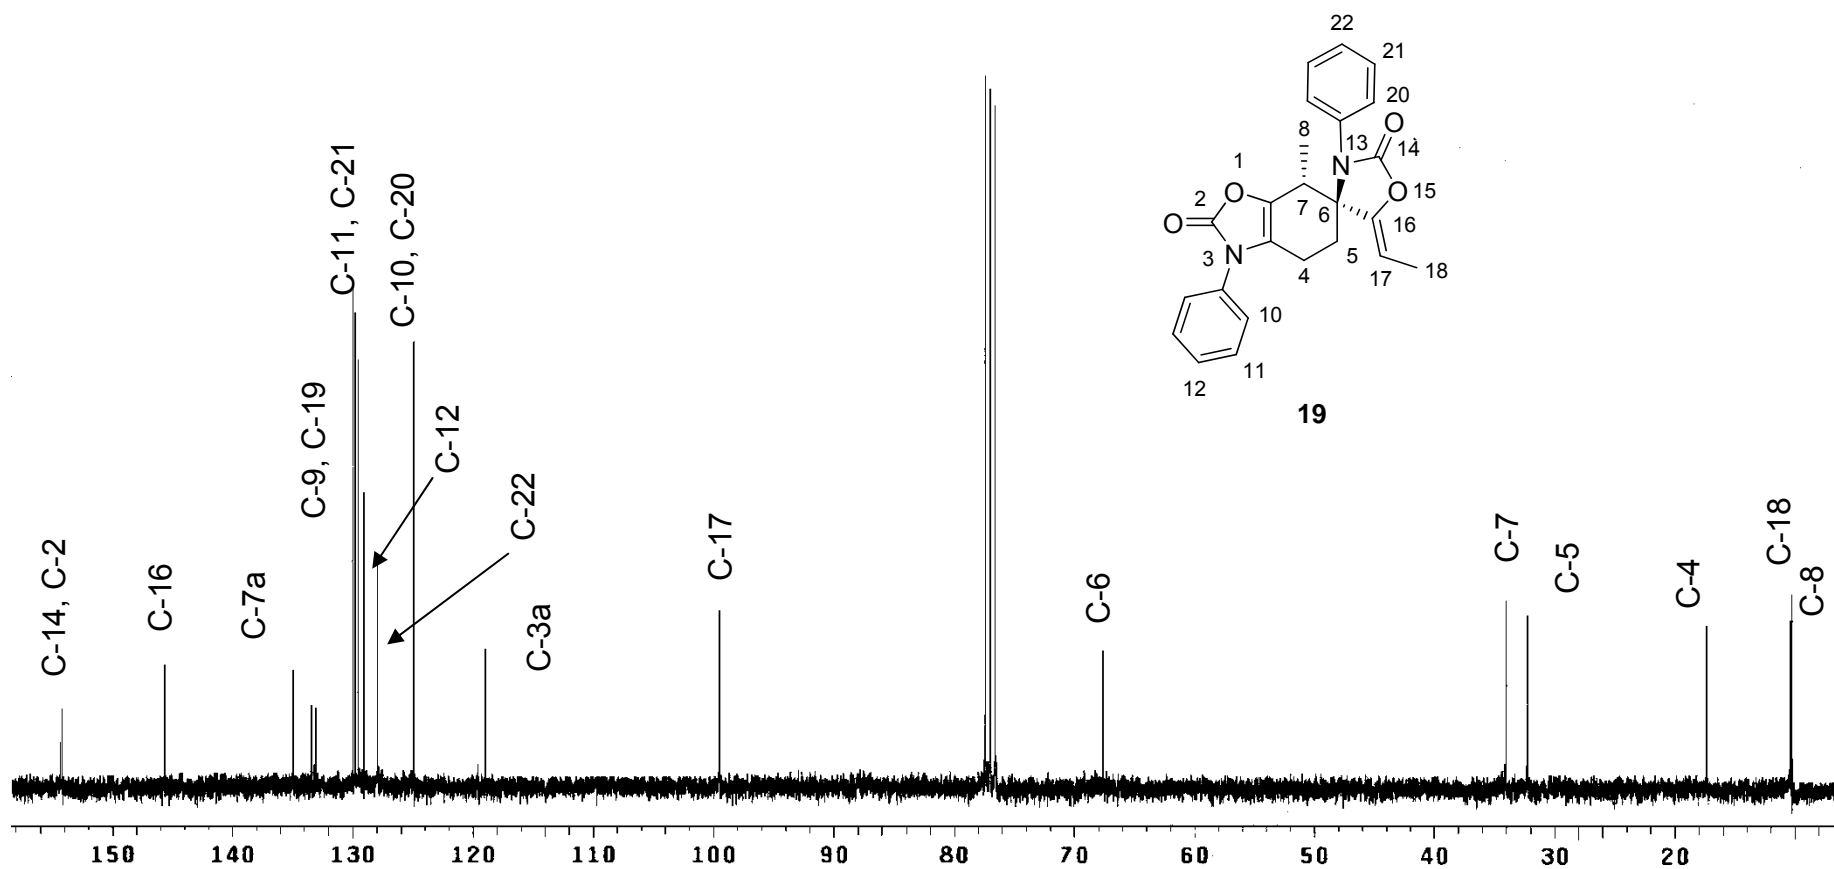

**13C NMR (CDCl<sub>3</sub>) 19**

S167

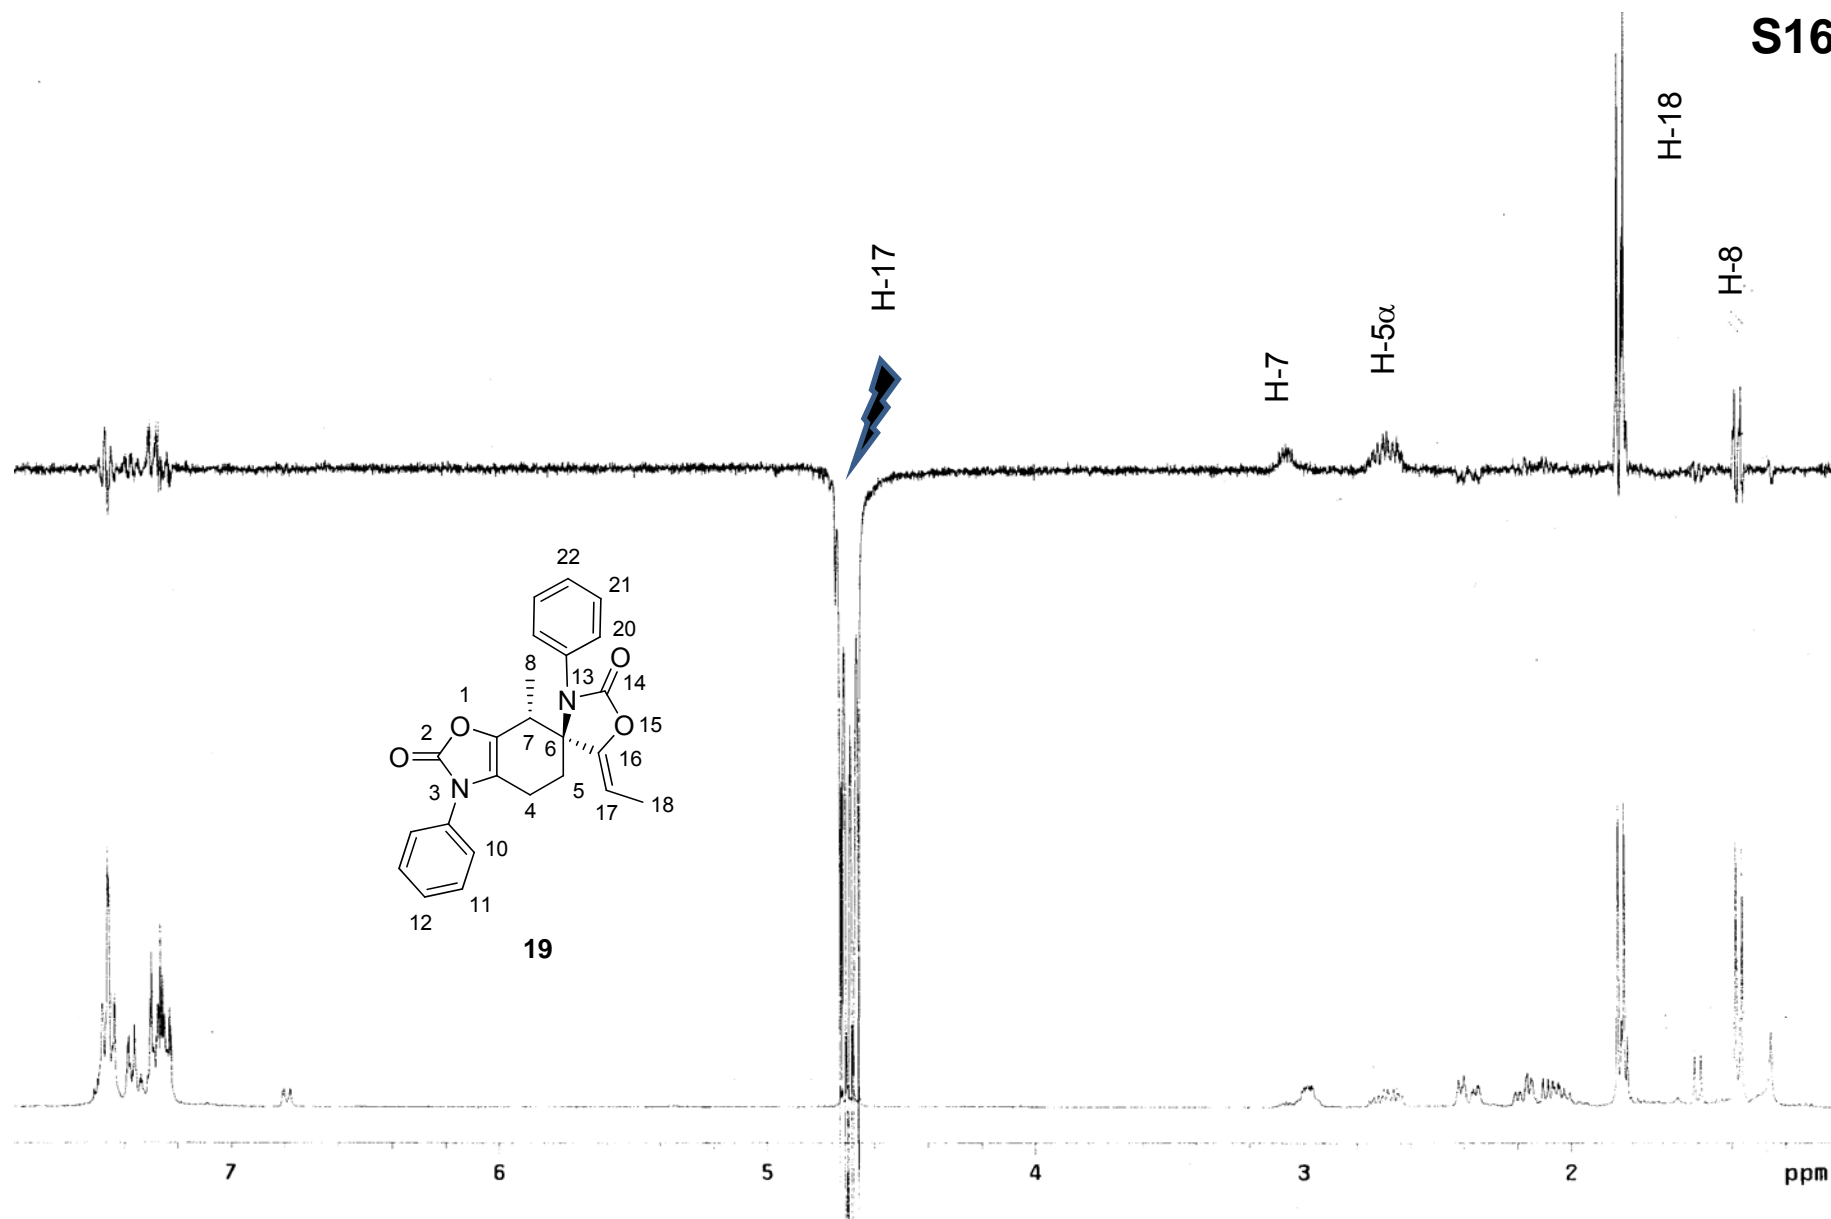

NOE experiment (CDCl<sub>3</sub>) **19**



S168

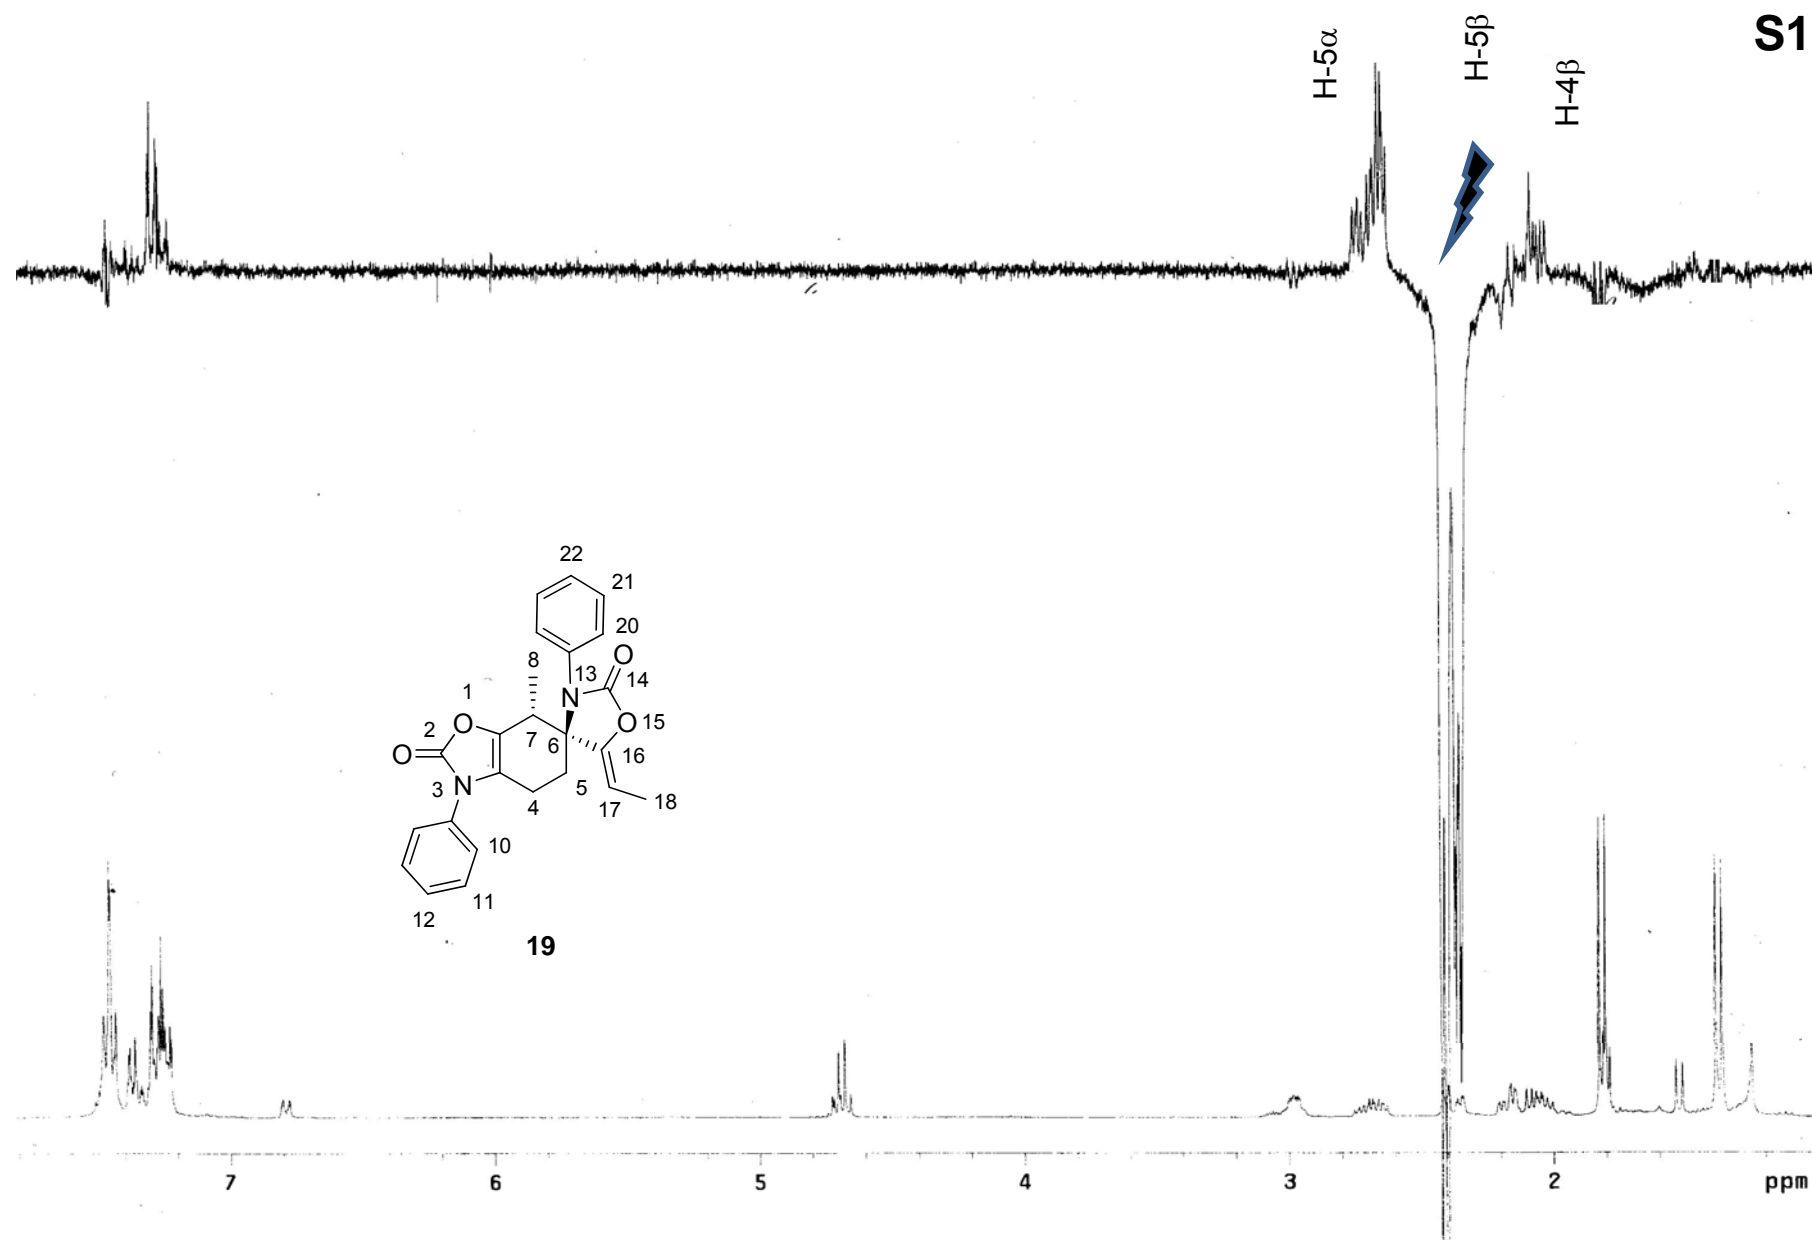

NOE experiment (CDCl<sub>3</sub>) 19

S169

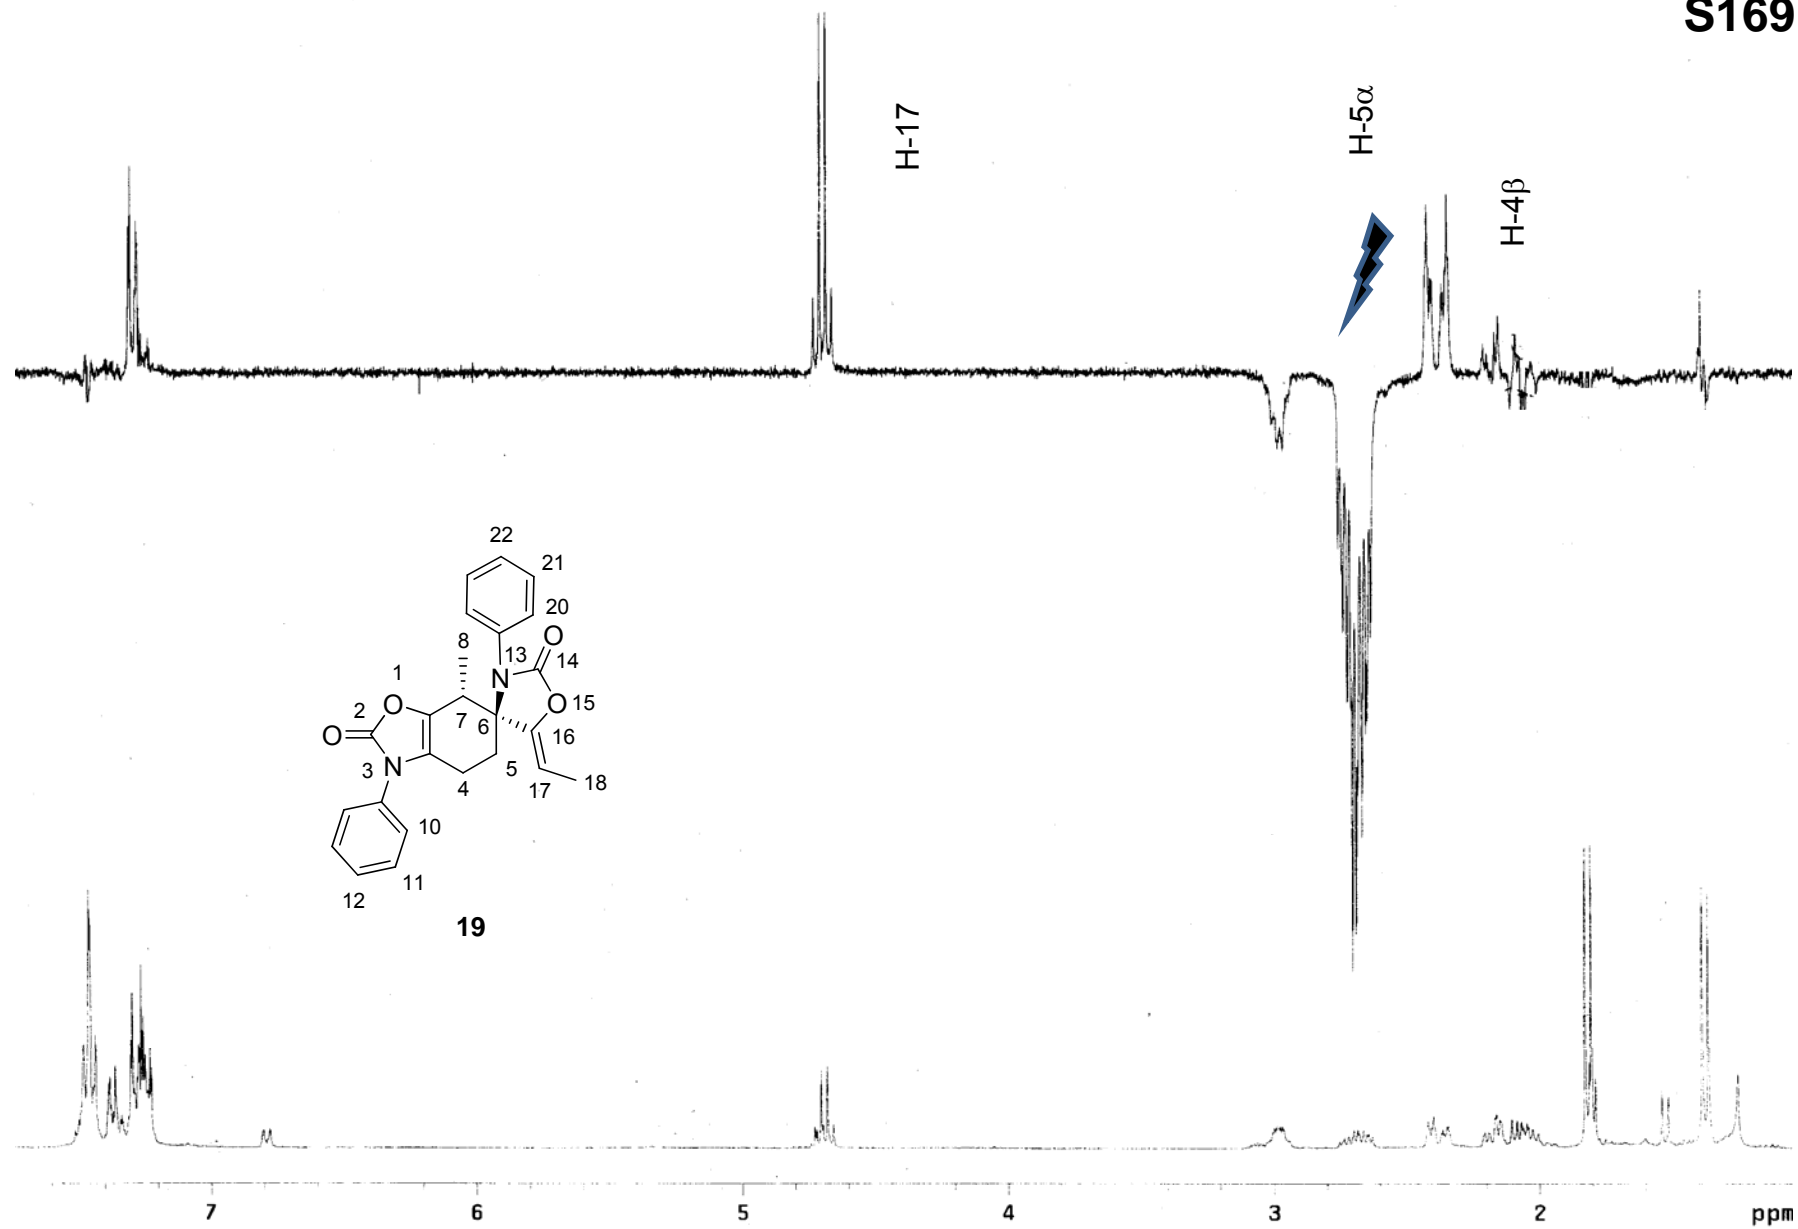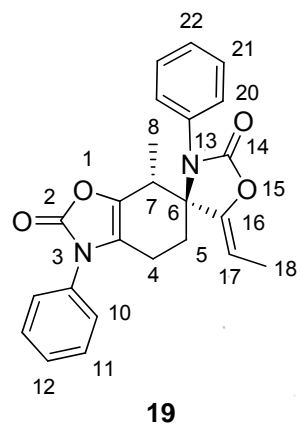

S170

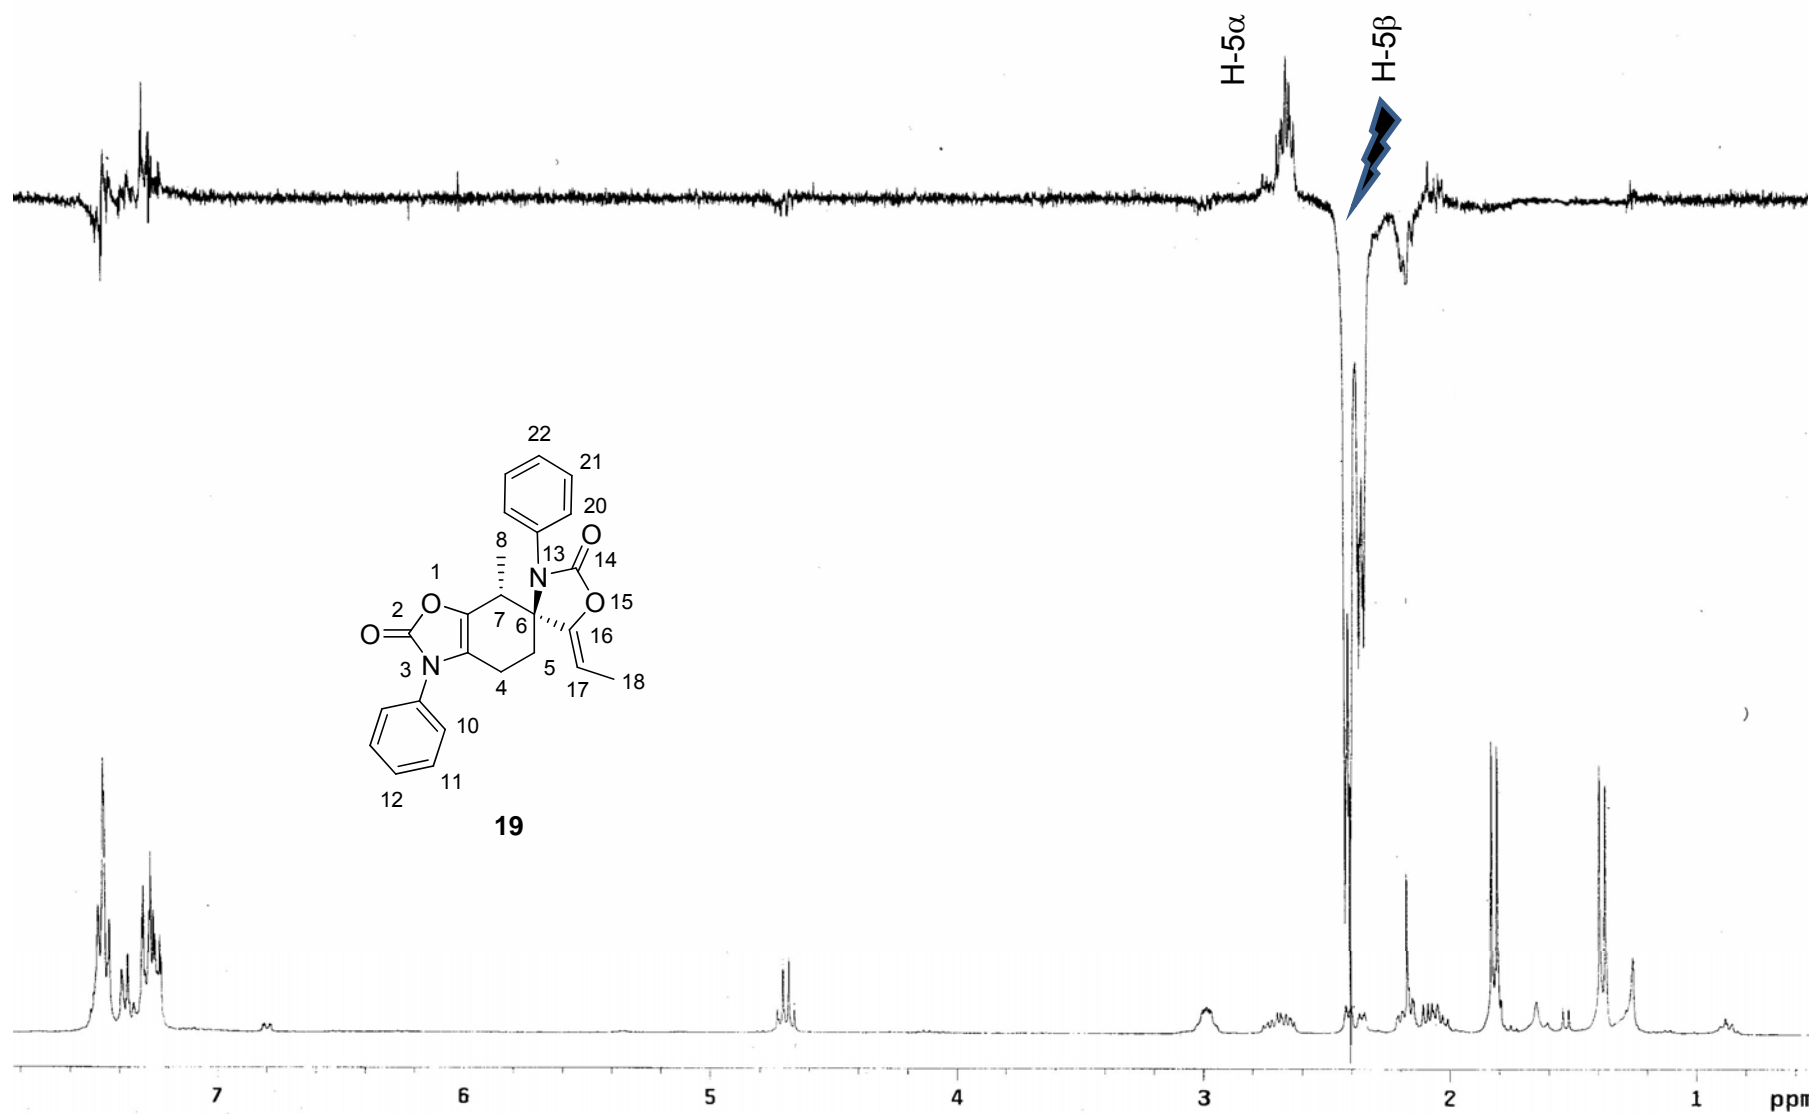

NOE experiment (CDCl<sub>3</sub>) 19

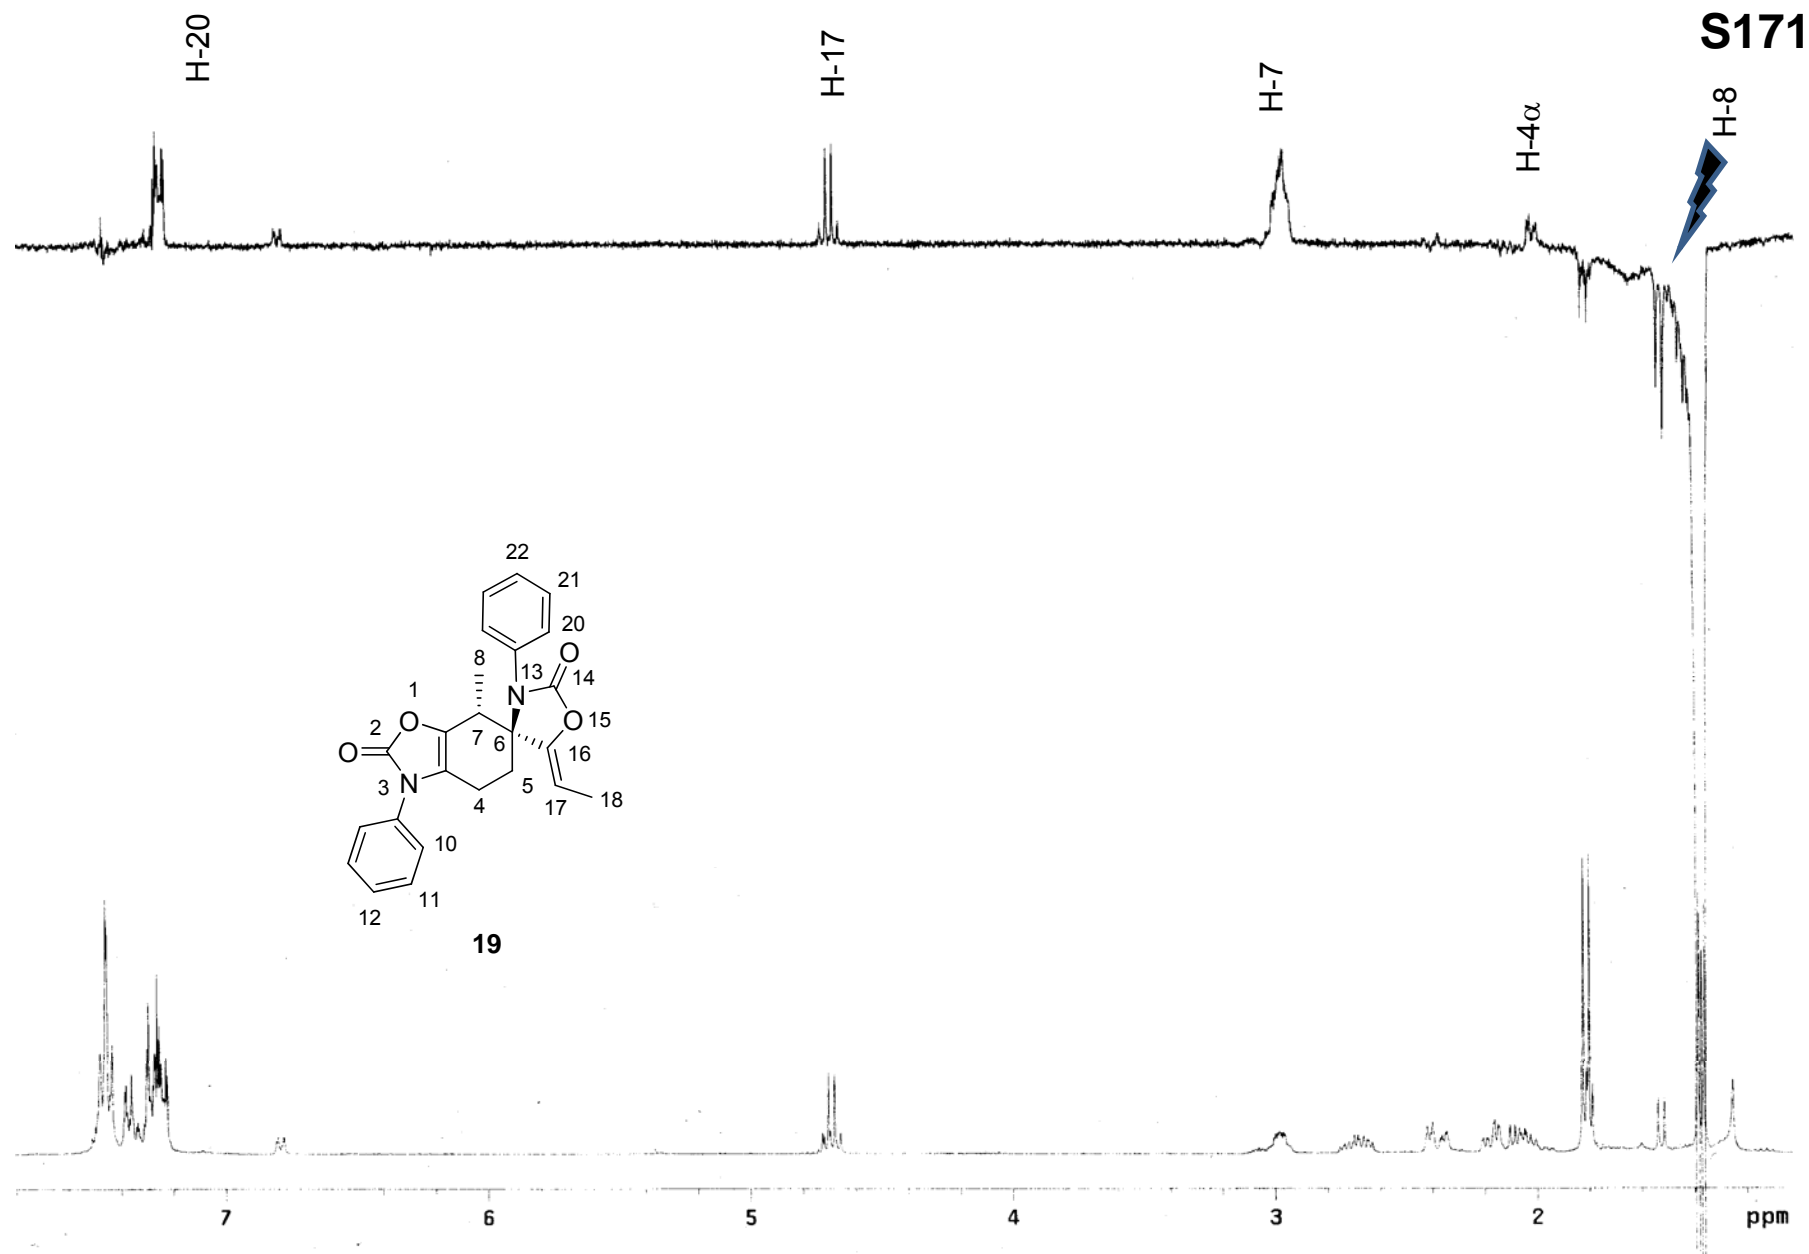

NOE experiment (CDCl<sub>3</sub>) **19**

S172

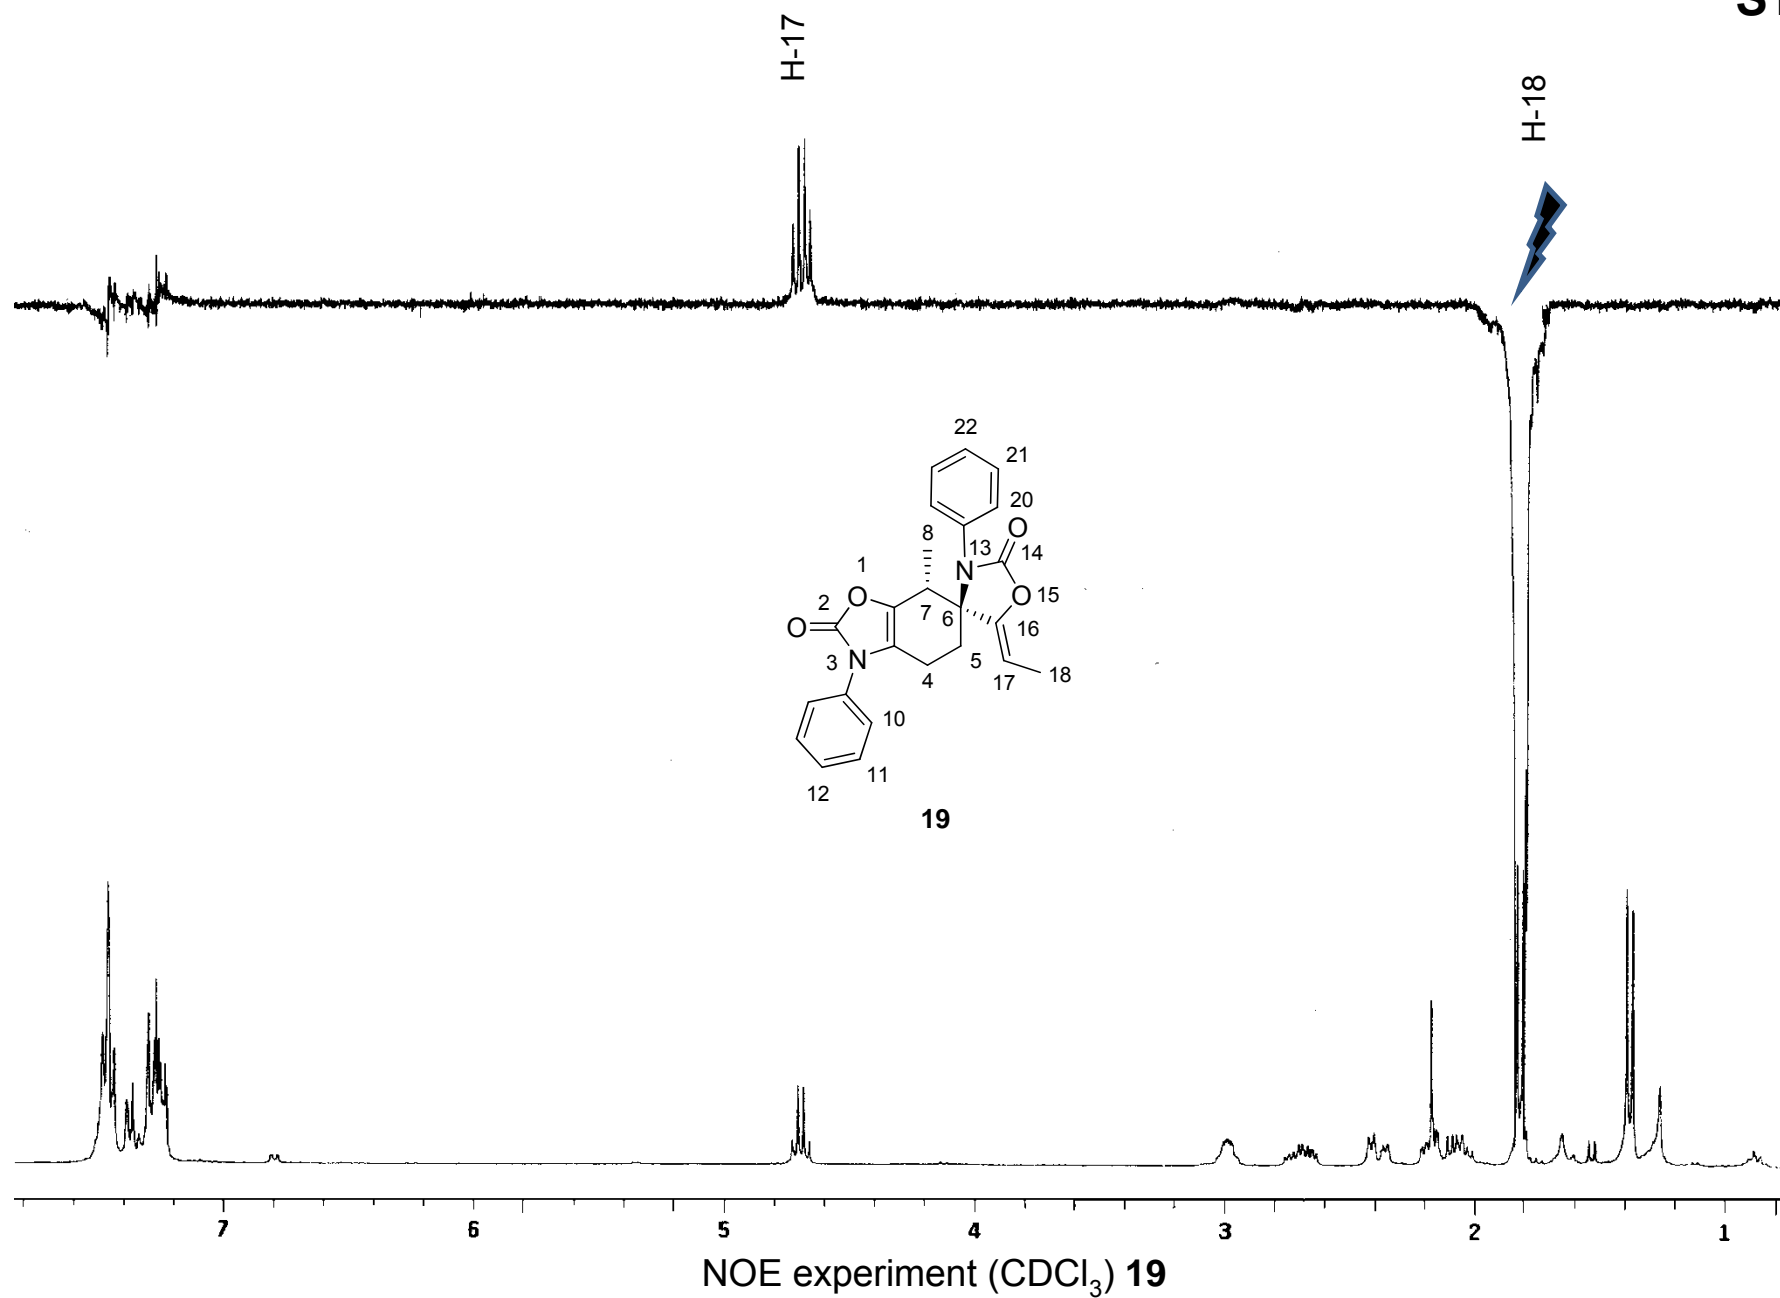

S173

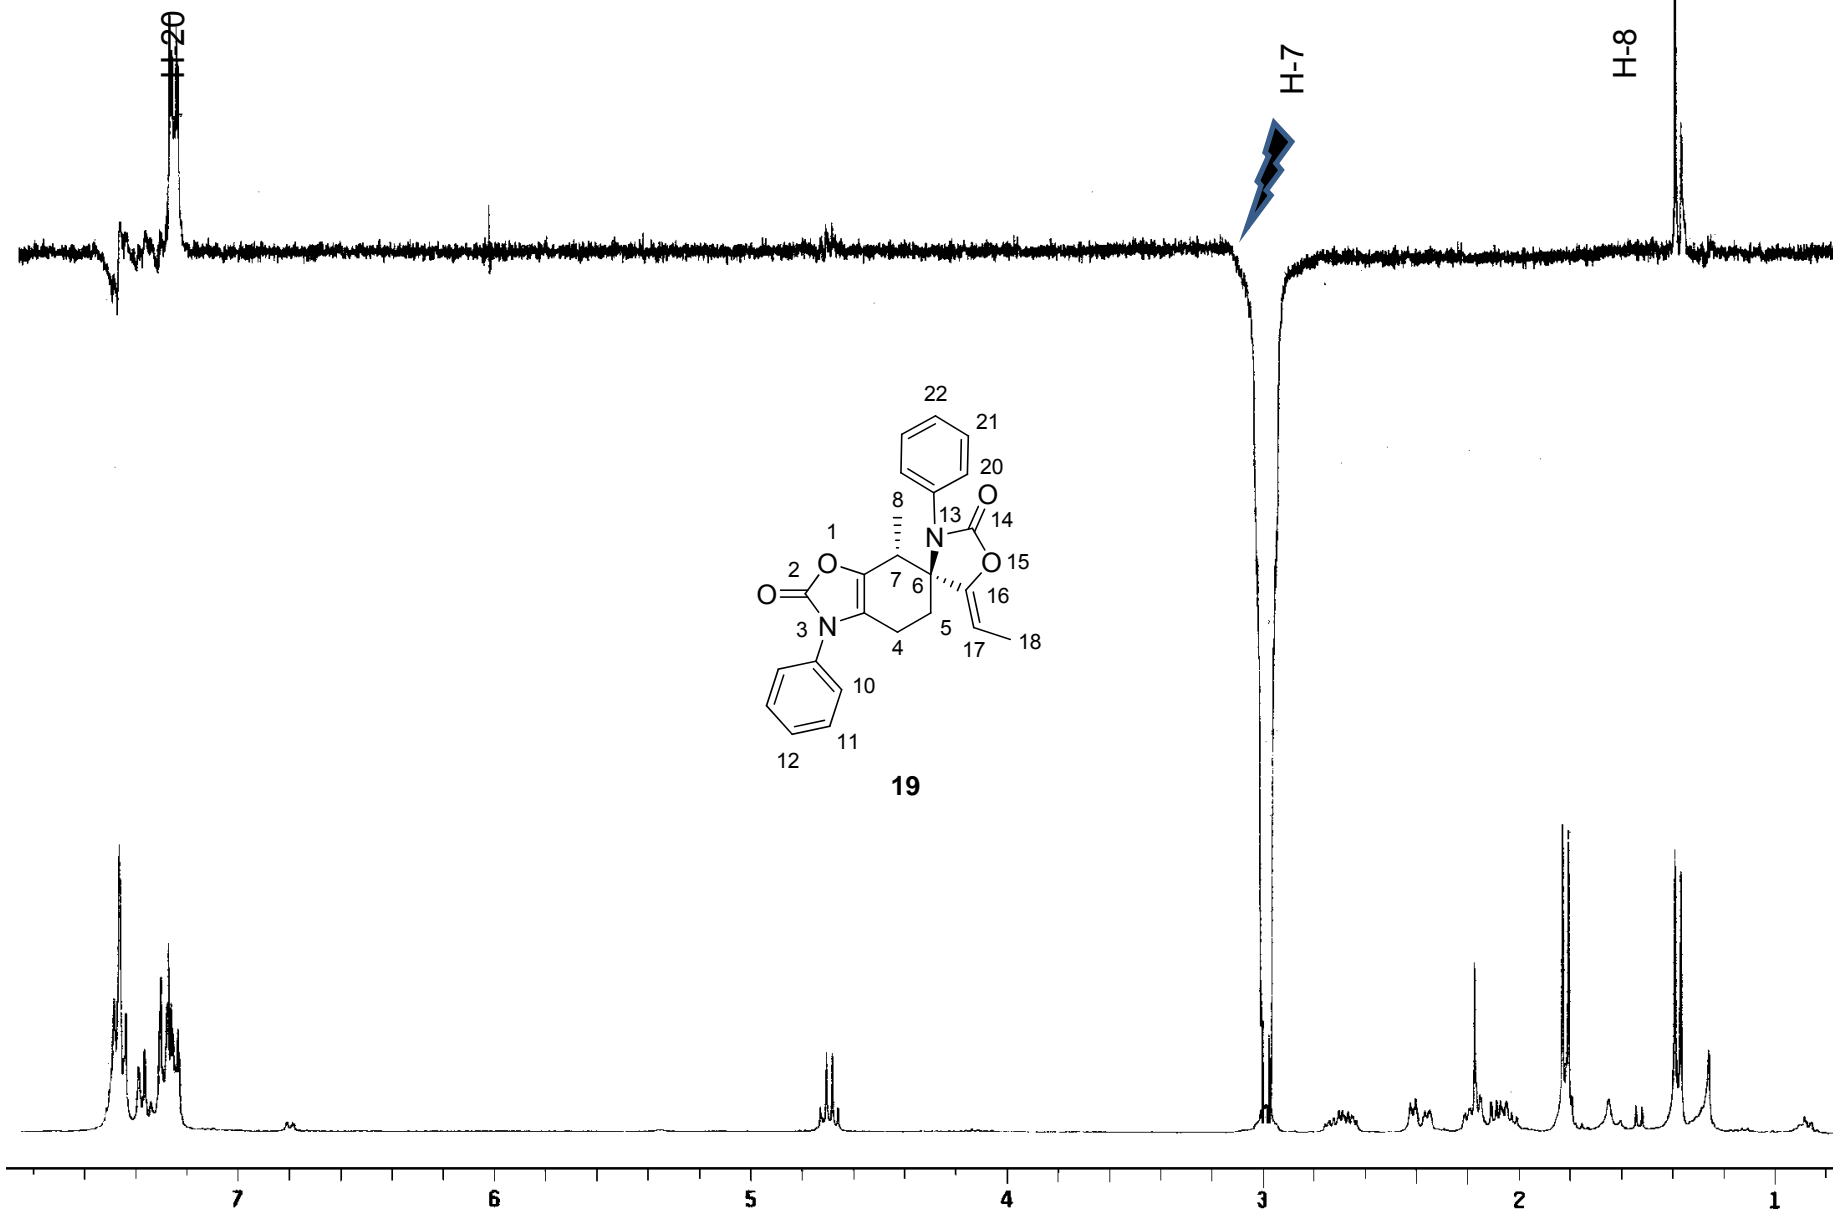

NOE experiment (CDCl<sub>3</sub>) 19

S174

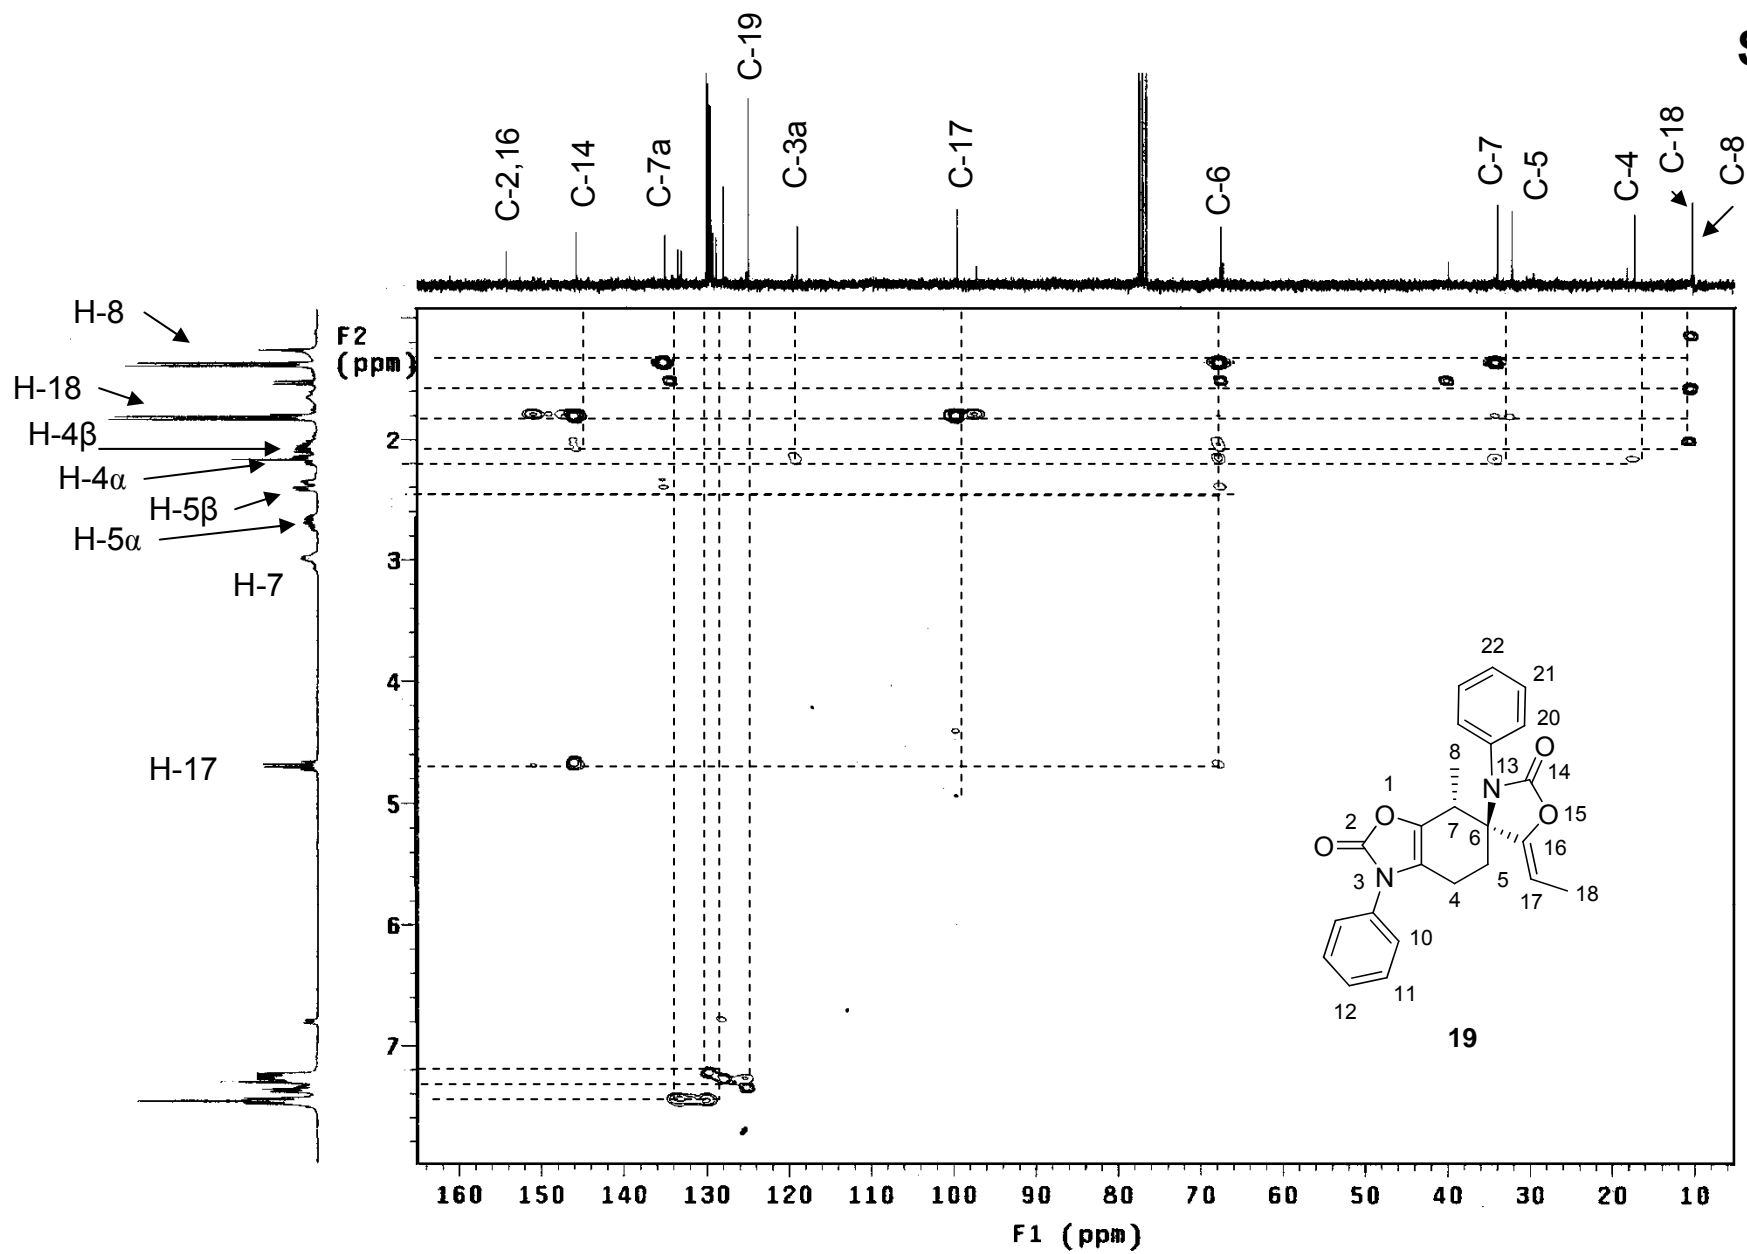

HMBC experiment (CDCl<sub>3</sub>) 19

Scan: 99-253

R.T.: 2.05

Base: m/z 402; 3.2%FS TIC: 1131560

#Ions: 368

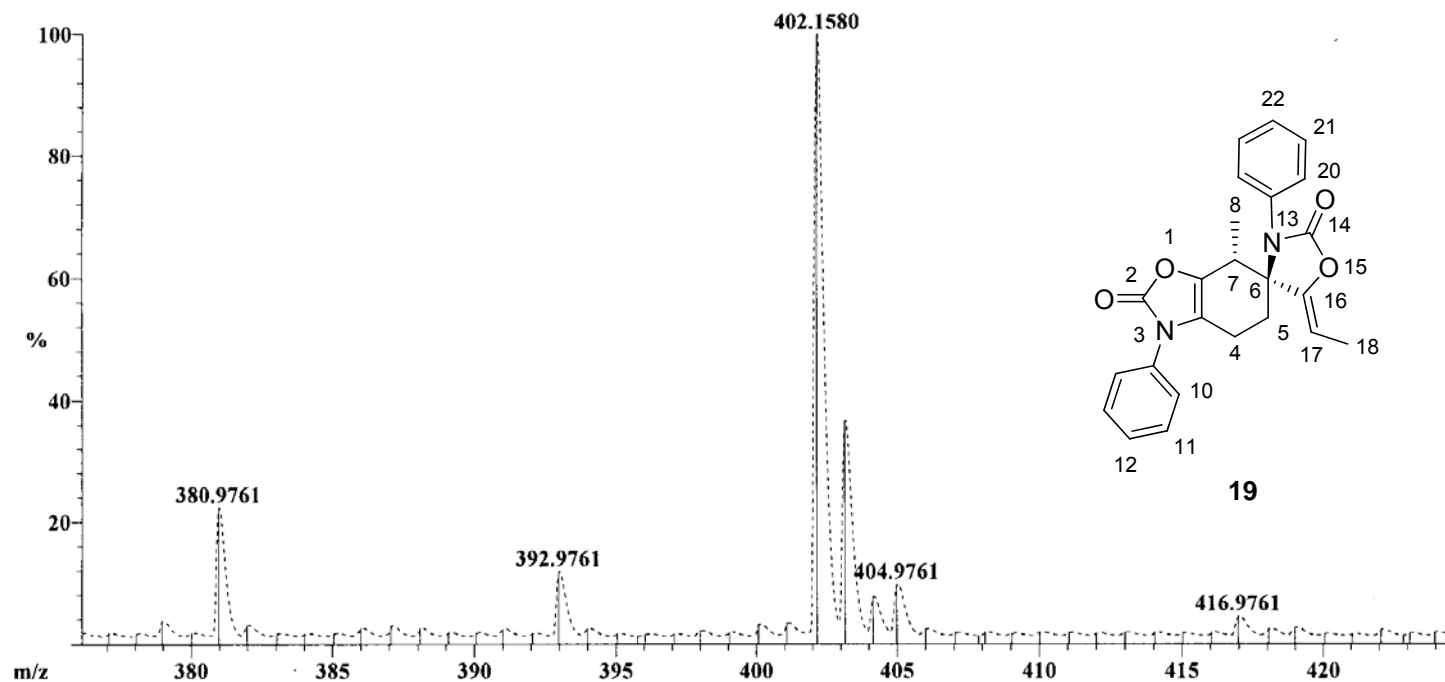Selected Isotopes : N<sub>0-2</sub> O<sub>0-4</sub> C<sub>0-24</sub> H<sub>0-22</sub>

Error Limit : 20 ppm

| <u>Measured Mass</u> | <u>% Base</u> | <u>Formula</u>                                                | <u>Calculated Mass</u> | <u>Error</u> |
|----------------------|---------------|---------------------------------------------------------------|------------------------|--------------|
| 402.1580             | 100.0%        | C <sub>24</sub> H <sub>22</sub> N <sub>2</sub> O <sub>4</sub> | 402.1580               | 0.1          |

HRMS 19



S176

Date: 21/05/08

Time: 02:45:09 p.m

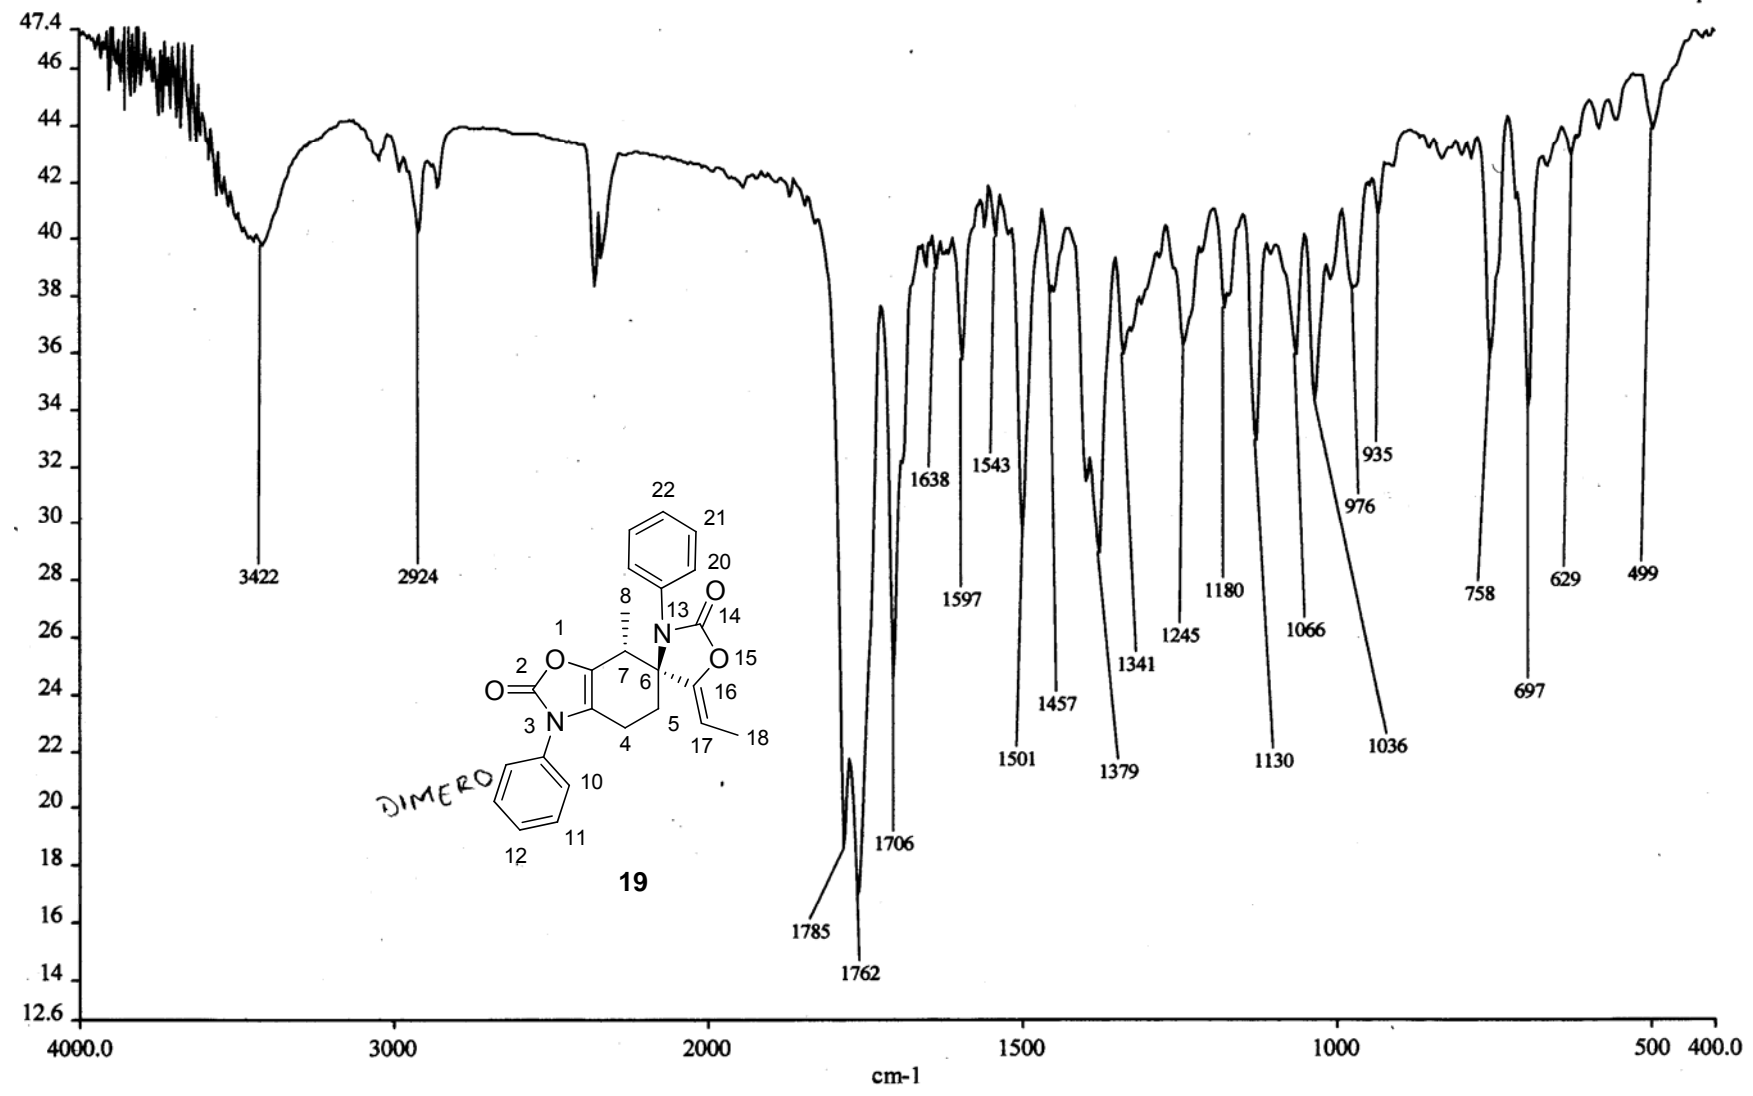

FT-IR (KBr) 19

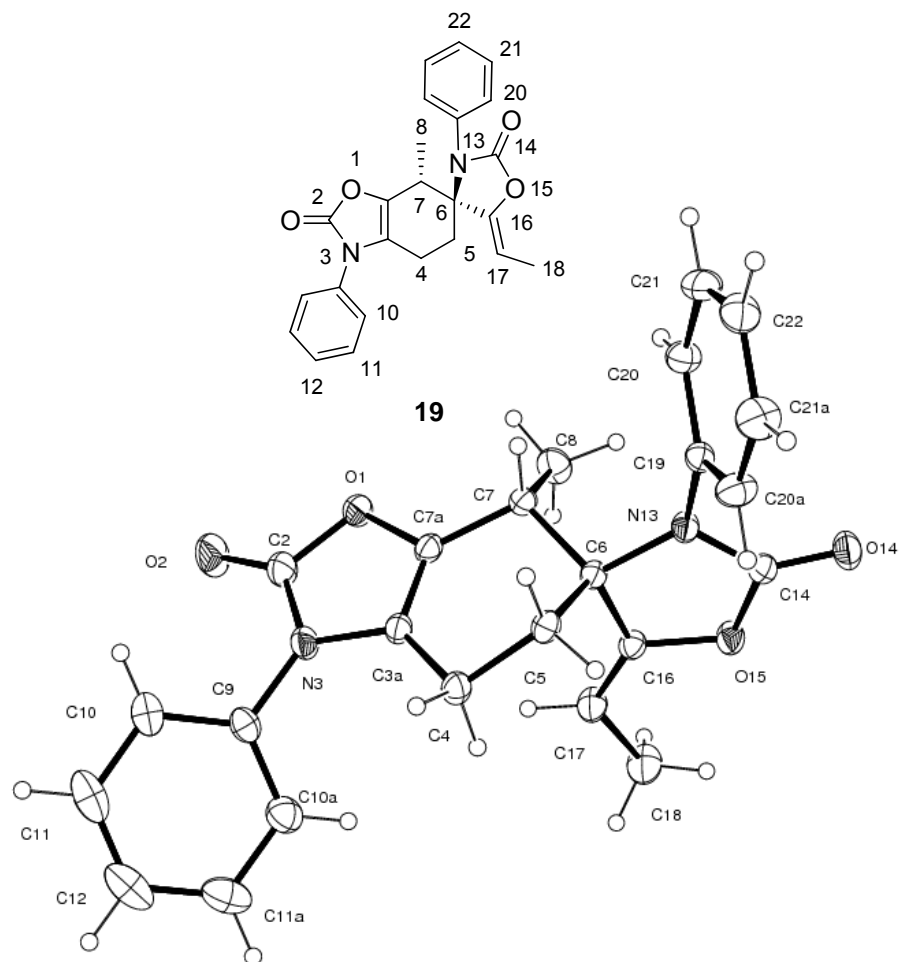

X-Ray structure for 19

Table 1. Crystal data and structure refinement for adduct **19**.

|                                 |                                                               |
|---------------------------------|---------------------------------------------------------------|
| Identification code             | 0027-fdr                                                      |
| Empirical formula               | C <sub>24</sub> H <sub>22</sub> N <sub>2</sub> O <sub>4</sub> |
| Formula weight                  | 402.44                                                        |
| Temperature                     | 292(2) K                                                      |
| Wavelength                      | 0.71073 Å                                                     |
| Unit cell dimensions            | a = 8.2082(2) Å<br>α = 84.819(3)°                             |
|                                 | b = 10.9272(4) Å<br>β = 89.340(3)°                            |
|                                 | c = 11.5021(5) Å<br>γ = 77.668(3)°                            |
| Volume                          | 1003.70(6) Å <sup>3</sup>                                     |
| Z                               | 2                                                             |
| Density (calculated)            | 1.332 Mg/m <sup>3</sup>                                       |
| Absorption coefficient          | 0.091 mm <sup>-1</sup>                                        |
| F(000)                          | 424                                                           |
| Crystal size                    | 0.65 x 0.48 x 0.39 mm <sup>3</sup>                            |
| Theta range for data collection | 2.54 to 32.60°                                                |
| Index ranges                    | -8 ≤ h ≤ 12, -16 ≤ k ≤ 16, -17 ≤ l ≤ 16                       |
| Reflections collected           | 14631                                                         |
| Independent reflections         | 6514 [R(int) = 0.0155]                                        |
| Completeness to theta = 27.50°  | 99.1 %                                                        |
| Max. and min. transmission      | 0.9652 and 0.9429                                             |

|                                      |                                    |
|--------------------------------------|------------------------------------|
| Refinement method                    | Full-matrix least-squares on $F^2$ |
| Data / restraints / parameters       | 6514 / 0 / 273                     |
| Goodness-of-fit on $F^2$             | 1.049                              |
| Final R indices [ $I > 2\sigma(I)$ ] | R1 = 0.0496, wR2 = 0.1340          |
| R indices (all data)                 | R1 = 0.0699, wR2 = 0.1429          |
| Largest diff. peak and hole          | 0.333 and -0.217 e.Å <sup>-3</sup> |

## Theoretical Calculations of Diene 1

S180

### Diene 1

|                                               |                             |
|-----------------------------------------------|-----------------------------|
| Zero-point correction =                       | 0.187911 (Hartree/Particle) |
| Thermal correction to Energy =                | 0.197784                    |
| Thermal correction to Enthalpy =              | 0.198729                    |
| Thermal correction to Gibbs Free Energy =     | 0.152175                    |
| Sum of electronic and zero-point Energies =   | -625.779944                 |
| Sum of electronic and thermal Energies =      | -625.770070                 |
| Sum of electronic and thermal Enthalpies =    | -625.769126                 |
| Sum of electronic and thermal Free Energies = | -625.815680                 |

| Coord: | X             | Y             | Z             |
|--------|---------------|---------------|---------------|
| C      | -1.7282111725 | 1.2128823597  | 2.6041125253  |
| C      | -1.1704522631 | -0.0000000096 | 2.1941389183  |
| C      | -1.7282108986 | -1.2128825034 | 2.6041125448  |
| C      | -2.8482257518 | -1.2095793408 | 3.4352532351  |
| C      | -3.4082142787 | -0.0000002502 | 3.8503084354  |
| C      | -2.8482260386 | 1.2095789568  | 3.4352531984  |
| N      | -0.0262263313 | 0.0000001035  | 1.3349237547  |
| C      | -0.0618629833 | -0.0000003636 | -0.0716730271 |

|   |               |               |               |
|---|---------------|---------------|---------------|
| C | 1.3635953429  | 0.0000000395  | -0.4579173059 |
| O | 2.1139841618  | 0.0000006745  | 0.7107076873  |
| C | 1.2780041484  | 0.0000007059  | 1.8083328245  |
| C | -1.1531152169 | -0.0000010159 | -0.8476816168 |
| O | 1.6661675944  | 0.0000012541  | 2.9450108674  |
| C | 1.9464618321  | -0.0000000913 | -1.6562412518 |
| H | 3.0250393343  | 0.0000002817  | -1.7466909743 |
| H | -4.2789824595 | -0.0000003436 | 4.4990261288  |
| H | 1.3479747662  | -0.0000005866 | -2.5576768999 |
| H | -2.1488100156 | -0.0000012287 | -0.4230870663 |
| H | -1.0572766818 | -0.0000013569 | -1.9254764087 |
| H | -1.2784618013 | 2.1446260908  | 2.2768717833  |
| H | -3.2802562419 | 2.1509397701  | 3.7603408821  |
| H | -3.2802557389 | -2.1509402438 | 3.7603409393  |
| H | -1.2784613062 | -2.1446261364 | 2.2768718264  |

### Lowest vibrational frequencies:

|                | 1        | 2        | 3        |
|----------------|----------|----------|----------|
|                | A        | A        | A        |
| Frequencies -- | 103.8414 | 111.9167 | 130.7086 |
| Red. masses -- | 4.3179   | 4.2290   | 5.3862   |
| Frc consts --  | 0.0274   | 0.0312   | 0.0542   |
| IR Inten --    | 0.6600   | 0.5131   | 1.6266   |

## Theoretical Calculations of Diene 2

S182

### Diene 2

|                                               |                             |
|-----------------------------------------------|-----------------------------|
| Zero-point correction =                       | 0.217658 (Hartree/Particle) |
| Thermal correction to Energy =                | 0.229030                    |
| Thermal correction to Enthalpy =              | 0.229974                    |
| Thermal correction to Gibbs Free Energy =     | 0.180188                    |
| Sum of electronic and zero-point Energies =   | -664.790511                 |
| Sum of electronic and thermal Energies =      | -664.779139                 |
| Sum of electronic and thermal Enthalpies =    | -664.778195                 |
| Sum of electronic and thermal Free Energies = | -664.827981                 |

| Coord: | X             | Y             | Z             |
|--------|---------------|---------------|---------------|
| C      | 1.2646818000  | 0.0000015666  | 1.8248570084  |
| N      | -0.0366526204 | 0.0000003403  | 1.3457355905  |
| C      | -0.0697954679 | -0.0000006156 | -0.0625493487 |
| C      | 1.3545813759  | -0.0000001220 | -0.4421873171 |
| O      | 2.1048733172  | 0.0000011184  | 0.7310981655  |
| C      | -1.1828489578 | 0.0000001647  | 2.2021165023  |
| C      | -1.7418101133 | 1.2127037626  | 2.6109915024  |
| C      | -2.8634970041 | 1.2094863408  | 3.4397991982  |
| C      | -3.4243504001 | -0.0000002250 | 3.8540049707  |

|   |               |               |               |
|---|---------------|---------------|---------------|
| C | -2.8634971576 | -1.2094866093 | 3.4397984292  |
| C | -1.7418102475 | -1.2127036297 | 2.6109907651  |
| C | -1.1648982410 | -0.0000017320 | -0.8344130475 |
| C | 1.9518471551  | -0.0000006752 | -1.637277573  |
| O | 1.6481341922  | 0.0000024083  | 2.9639391056  |
| C | 3.4426401345  | -0.0000000610 | -1.831289221  |
| H | -4.2964150958 | -0.0000003759 | 4.5009722281  |
| H | 1.3060636015  | -0.0000016495 | -2.5094410399 |
| H | -2.1584199340 | -0.0000020003 | -0.4050131329 |
| H | -1.0746368309 | -0.0000023897 | -1.9126855725 |
| H | -1.2915630993 | 2.1444100838  | 2.2843685915  |
| H | -3.2962161806 | 2.1509374801  | 3.7638466675  |
| H | -3.2962164582 | -2.1509378942 | 3.7638453051  |
| H | -1.2915633255 | -2.1444097993 | 2.2843672849  |
| H | 3.6997100883  | 0.0000001790  | -2.8925672227 |
| H | 3.9066743845  | 0.8788442006  | -1.3690562839 |
| H | 3.9066750848  | -0.8788441058 | -1.3690565558 |

**Lowest vibrational frequencies:**

|                | 1       | 2        | 3        |
|----------------|---------|----------|----------|
|                | A       | A        | A        |
| Frequencies -- | 82.6455 | 103.6999 | 117.2721 |
| Red. masses -- | 4.3210  | 4.2396   | 4.9071   |
| Frc consts --  | 0.0174  | 0.0269   | 0.0398   |
| IR Inten --    | 1.0520  | 0.4511   | 1.0603   |



## Theoretical Calculations of Diene 3

S184

### Diene 3

|                                               |                             |
|-----------------------------------------------|-----------------------------|
| Zero-point correction =                       | 0.207560 (Hartree/Particle) |
| Thermal correction to Energy =                | 0.220123                    |
| Thermal correction to Enthalpy =              | 0.221067                    |
| Thermal correction to Gibbs Free Energy =     | 0.168176                    |
| Sum of electronic and zero-point Energies =   | -1123.697456                |
| Sum of electronic and thermal Energies =      | -1123.684893                |
| Sum of electronic and thermal Enthalpies =    | -1123.683949                |
| Sum of electronic and thermal Free Energies = | -1123.736840                |

| Coord: | X             | Y             | Z             |
|--------|---------------|---------------|---------------|
| C      | -1.6834465688 | 1.2838429165  | 2.5512378520  |
| N      | -1.1327734599 | 0.0525855446  | 2.1422720832  |
| C      | -1.8390793676 | -1.0215546479 | 2.6668206952  |
| O      | -2.8638670330 | -0.5052674429 | 3.4278946490  |
| C      | -2.8230817563 | 0.8875491943  | 3.3976049934  |
| C      | 0.0067076478  | -0.1061957866 | 1.2960192861  |
| C      | 1.2843983206  | -0.1778012371 | 1.8551093441  |
| C      | 2.3998978564  | -0.3264275538 | 1.0332774356  |
| C      | 2.2203880603  | -0.3985404513 | -0.3480037592 |
| C      | 0.9499450663  | -0.3264272416 | -0.9190870177 |
| C      | -0.1592260121 | -0.1778009147 | -0.0887338283 |

|    |               |               |               |
|----|---------------|---------------|---------------|
| O  | -1.6377521253 | -2.1967997843 | 2.5173018414  |
| C  | -3.7236796112 | 1.6129752848  | 4.0664475667  |
| C  | -1.2398108654 | 2.5042288107  | 2.2217652532  |
| C  | -4.8335993217 | 1.0228907324  | 4.8907460259  |
| H  | -3.6326639382 | 2.6922922004  | 3.9988535159  |
| H  | -0.3776131654 | 2.6391995518  | 1.5814412091  |
| H  | -1.7411707034 | 3.3878197325  | 2.5941077300  |
| H  | -1.1566233115 | -0.1241730404 | -0.512101672  |
| H  | 0.8321394631  | -0.3887614023 | -1.9947495879 |
| Cl | 3.6221998288  | -0.5845533672 | -1.3890803615 |
| H  | 3.3956007496  | -0.3887619573 | 1.4569563742  |
| H  | 1.4014163645  | -0.1241736099 | 2.932304084   |
| H  | -5.4441116017 | 1.8064396509  | 5.344152152   |
| H  | -5.4898999590 | 0.3891344478  | 4.2833875338  |
| H  | -4.4418555714 | 0.3891343708  | 5.6945815818  |

### Lowest vibrational frequencies:

|                | 1       | 2       | 3        |
|----------------|---------|---------|----------|
|                | A''     | A'      | A''      |
| Frequencies -- | 74.0418 | 83.5076 | 105.4317 |
| Red. masses -- | 4.7760  | 8.1362  | 4.2466   |
| Frc consts --  | 0.0154  | 0.0334  | 0.0278   |
| IR Inten --    | 0.2252  | 0.4292  | 0.4195   |

## Theoretical Calculations of compound 4a

S186

### Compound 4a

|                                             |   |                             |
|---------------------------------------------|---|-----------------------------|
| Zero-point correction                       | = | 0.217981 (Hartree/Particle) |
| Thermal correction to Energy                | = | 0.229972                    |
| Thermal correction to Enthalpy              | = | 0.230916                    |
| Thermal correction to Gibbs Free Energy     | = | 0.179543                    |
| Sum of electronic and zero-point Energies   | = | -664.800316                 |
| Sum of electronic and thermal Energies      | = | -664.788324                 |
| Sum of electronic and thermal Enthalpies    | = | -664.787380                 |
| Sum of electronic and thermal Free Energies | = | -664.838753                 |

| Coord: | X             | Y            | Z             |
|--------|---------------|--------------|---------------|
| C      | 0.3444967272  | 0.0000000000 | -0.4590285901 |
| C      | 0.1890292679  | 0.0000000000 | 0.8928972551  |
| C      | 1.7489097610  | 0.0000000000 | -0.9842574692 |
| H      | 1.1385802006  | 0.0000000000 | 1.4248824681  |
| C      | -0.9918687171 | 0.0000000000 | 1.741753977   |
| C      | -0.7235649543 | 0.0000000000 | -1.4071337536 |
| N      | -1.5978158497 | 0.0000000000 | -2.1765319386 |
| C      | -0.7708904464 | 0.0000000000 | 3.1359461253  |
| C      | -1.8333163567 | 0.0000000000 | 4.0329653973  |

|   |               |               |               |
|---|---------------|---------------|---------------|
| C | -3.1447327774 | 0.0000000000  | 3.553951131   |
| C | -3.3829794474 | 0.0000000000  | 2.1764417401  |
| C | -2.3240640172 | 0.0000000000  | 1.2750068442  |
| H | 0.2502393686  | 0.0000000000  | 3.5072897057  |
| H | -1.6405260802 | 0.0000000000  | 5.101278681   |
| H | -3.9784371821 | 0.0000000000  | 4.2498390788  |
| H | -4.4020785627 | 0.0000000000  | 1.8021983846  |
| H | -2.5315491168 | 0.0000000000  | 0.2126576361  |
| O | 1.7723630535  | 0.0000000000  | -2.3266590884 |
| O | 2.7396861743  | 0.0000000000  | -0.2806017041 |
| C | 3.0853589294  | 0.0000000000  | -2.9405154667 |
| C | 2.8831039359  | 0.0000000000  | -4.4423623826 |
| H | 3.6311512668  | 0.8830630447  | -2.5944464976 |
| H | 3.6311512668  | -0.8830630447 | -2.5944464976 |
| H | 3.8552880599  | 0.0000000000  | -4.9447234348 |
| H | 2.3288032378  | -0.8864296822 | -4.7623542305 |
| H | 2.3288032378  | 0.8864296822  | -4.7623542305 |

**Lowest vibrational frequencies:**

|                | 1       | 2        | 3        |
|----------------|---------|----------|----------|
|                | A''     | A''      | A'       |
| Frequencies -- | 72.1003 | 105.8742 | 112.6419 |
| Red. masses -- | 5.2515  | 4.4336   | 4.4621   |
| Frc consts --  | 0.0161  | 0.0293   | 0.0334   |
| IR Inten --    | 2.9389  | 0.0612   | 1.5674   |

## Theoretical Calculations of compound 4b

S188

### Compound 4b

|                                               |                             |
|-----------------------------------------------|-----------------------------|
| Zero-point correction =                       | 0.252919 (Hartree/Particle) |
| Thermal correction to Energy =                | 0.267034                    |
| Thermal correction to Enthalpy =              | 0.267979                    |
| Thermal correction to Gibbs Free Energy =     | 0.212078                    |
| Sum of electronic and zero-point Energies =   | -778.650725                 |
| Sum of electronic and thermal Energies =      | -778.636609                 |
| Sum of electronic and thermal Enthalpies =    | -778.635665                 |
| Sum of electronic and thermal Free Energies = | -778.691565                 |

| Coord: | X             | Y            | Z             |
|--------|---------------|--------------|---------------|
| C      | -1.6978135678 | 0.0000000000 | 0.6458950812  |
| C      | -0.3857583453 | 0.0000000000 | 1.1637518760  |
| C      | -0.2389916448 | 0.0000000000 | 2.5721632225  |
| C      | -1.3323365658 | 0.0000000000 | 3.4167956458  |
| C      | -2.6306996443 | 0.0000000000 | 2.8786388003  |
| C      | -2.8050710570 | 0.0000000000 | 1.4851551718  |
| C      | 0.8255279996  | 0.0000000000 | 0.3718647013  |
| C      | 1.0433667009  | 0.0000000000 | -0.9749442489 |
| C      | 0.0154326749  | 0.0000000000 | -1.9649978163 |
| N      | -0.8335411479 | 0.0000000000 | -2.7628847064 |
| C      | 2.4657778373  | 0.0000000000 | -1.4360279853 |
| O      | 3.4271668412  | 0.0000000000 | -0.6914623254 |
| O      | 2.5501137803  | 0.0000000000 | -2.7780817848 |

|   |               |               |               |
|---|---------------|---------------|---------------|
| C | 3.8882573513  | 0.0000000000  | -3.3313834649 |
| C | 3.7535978449  | 0.0000000000  | -4.8411547187 |
| H | 1.7512651204  | 0.0000000000  | 0.9446227487  |
| H | 0.7608815072  | 0.0000000000  | 2.9971566138  |
| H | -1.2167447529 | 0.0000000000  | 4.4950990046  |
| O | -3.6410586371 | 0.0000000000  | 3.7813847022  |
| H | -3.7963710335 | 0.0000000000  | 1.0489302683  |
| H | -1.8607397929 | 0.0000000000  | -0.4243872835 |
| H | 4.4192001070  | 0.8829012423  | -2.9623290768 |
| H | 4.4192001070  | -0.8829012423 | -2.9623290768 |
| H | 4.7470640548  | 0.0000000000  | -5.3001474423 |
| H | 3.2137590177  | -0.8863371653 | -5.1853087927 |
| H | 3.2137590177  | 0.8863371653  | -5.1853087927 |
| C | -4.9839466810 | 0.0000000000  | 3.3074732518  |
| H | -5.6131435615 | 0.0000000000  | 4.1978055003  |
| H | -5.1985875238 | 0.8945534683  | 2.7111437186  |
| H | -5.1985875238 | -0.8945534683 | 2.7111437186  |

**Lowest vibrational frequencies:**

|                | 1       | 2       | 3        |
|----------------|---------|---------|----------|
|                | A''     | A'      | A''      |
| Frequencies -- | 64.1322 | 99.9633 | 103.0605 |
| Red. masses -- | 5.3365  | 4.5588  | 5.0958   |
| Frc consts --  | 0.0129  | 0.0268  | 0.0319   |
| IR Inten --    | 2.1485  | 1.1931  | 0.8888   |

## Theoretical Calculations of compound 4c

S190

### Compound 4c

|                                               |                             |
|-----------------------------------------------|-----------------------------|
| Zero-point correction =                       | 0.207856 (Hartree/Particle) |
| Thermal correction to Energy =                | 0.221054                    |
| Thermal correction to Enthalpy =              | 0.221998                    |
| Thermal correction to Gibbs Free Energy =     | 0.167452                    |
| Sum of electronic and zero-point Energies =   | -1123.707196                |
| Sum of electronic and thermal Energies =      | -1123.693998                |
| Sum of electronic and thermal Enthalpies =    | -1123.693054                |
| Sum of electronic and thermal Free Energies = | -1123.747600                |

| Coord: | X             | Y            | Z             |
|--------|---------------|--------------|---------------|
| C      | -1.7299356020 | 0.0000000000 | 0.6601508968  |
| C      | -0.3973768592 | 0.0000000000 | 1.1259712969  |
| C      | -0.1823602059 | 0.0000000000 | 2.5205627591  |
| C      | -1.2400741131 | 0.0000000000 | 3.4209750972  |
| C      | -2.5446606191 | 0.0000000000 | 2.9265185111  |
| C      | -2.7949671253 | 0.0000000000 | 1.5520978893  |
| C      | 0.7844450852  | 0.0000000000 | 0.2795395869  |
| C      | 0.9387788269  | 0.0000000000 | -1.0722261900 |
| C      | -0.1315043956 | 0.0000000000 | -2.0173570071 |
| N      | -1.0112131804 | 0.0000000000 | -2.7805225843 |
| C      | 2.3435621004  | 0.0000000000 | -1.5985861040 |

|    |               |               |               |
|----|---------------|---------------|---------------|
| O  | 3.3333315443  | 0.0000000000  | -0.8939012062 |
| O  | 2.3650886184  | 0.0000000000  | -2.9401238218 |
| C  | 3.6770143468  | 0.0000000000  | -3.5575966059 |
| C  | 3.4706055128  | 0.0000000000  | -5.0588765159 |
| H  | 1.7337016166  | 0.0000000000  | 0.8119148865  |
| H  | 0.8356244071  | 0.0000000000  | 2.8993059625  |
| H  | -1.0612323066 | 0.0000000000  | 4.4900050913  |
| Cl | -3.8906587248 | 0.0000000000  | 4.0473733566  |
| H  | -3.8158427018 | 0.0000000000  | 1.1876145714  |
| H  | -1.9404715528 | 0.0000000000  | -0.401579774  |
| H  | 4.2231499048  | 0.8832657899  | -3.2128312379 |
| H  | 4.2231499048  | -0.8832657899 | -3.2128312379 |
| H  | 4.4416289415  | 0.0000000000  | -5.5633841444 |
| H  | 2.9157296797  | -0.8865540904 | -5.3773722754 |
| H  | 2.9157296797  | 0.8865540904  | -5.3773722754 |

**Lowest vibrational frequencies:**

|                | 1       | 2       | 3       |
|----------------|---------|---------|---------|
|                | A''     | A''     | A'      |
| Frequencies -- | 61.9972 | 94.0222 | 97.4843 |
| Red. masses -- | 6.5273  | 6.8773  | 5.5938  |
| Frc consts --  | 0.0148  | 0.0358  | 0.0313  |
| IR Inten --    | 0.4428  | 3.9570  | 0.2736  |



## Theoretical Calculations of compound 4d

S192

### Compound 4d

|                                               |                             |
|-----------------------------------------------|-----------------------------|
| Zero-point correction =                       | 0.221067 (Hartree/Particle) |
| Thermal correction to Energy =                | 0.235151                    |
| Thermal correction to Enthalpy =              | 0.236095                    |
| Thermal correction to Gibbs Free Energy =     | 0.179925                    |
| Sum of electronic and zero-point Energies =   | -868.257250                 |
| Sum of electronic and thermal Energies =      | -868.243167                 |
| Sum of electronic and thermal Enthalpies =    | -868.242222                 |
| Sum of electronic and thermal Free Energies = | -868.298392                 |

| Coord: | X             | Y            | Z             |
|--------|---------------|--------------|---------------|
| C      | -2.4368404972 | 0.0000000000 | -1.6188905457 |
| C      | -1.1412206808 | 0.0000000000 | -1.1189213455 |
| C      | -0.9092176029 | 0.0000000000 | 0.2738484332  |
| C      | -2.0223453113 | 0.0000000000 | 1.1425021285  |
| C      | -3.3215886542 | 0.0000000000 | 0.6535285972  |
| C      | -3.5078504873 | 0.0000000000 | -0.7264984476 |
| C      | 0.4073767643  | 0.0000000000 | 0.8999855018  |
| C      | 1.6606325934  | 0.0000000000 | 0.3761398341  |
| C      | 2.8073648352  | 0.0000000000 | 1.3499811372  |
| O      | 3.9865151318  | 0.0000000000 | 0.7153382983  |
| C      | 5.1683611442  | 0.0000000000 | 1.5590128184  |
| C      | 6.3764324059  | 0.0000000000 | 0.6447182488  |

|   |               |               |               |
|---|---------------|---------------|---------------|
| N | -4.8823705340 | 0.0000000000  | -1.2597421032 |
| C | 1.9687764509  | 0.0000000000  | -1.0184356696 |
| N | 2.2137106347  | 0.0000000000  | -2.1566919061 |
| O | 2.6678839768  | 0.0000000000  | 2.5560771492  |
| H | 0.4030049001  | 0.0000000000  | 1.9881221015  |
| H | -1.8571351653 | 0.0000000000  | 2.2155318677  |
| H | -4.1817866032 | 0.0000000000  | 1.3104965052  |
| H | -2.6313389212 | 0.0000000000  | -2.6837944179 |
| H | -0.3122733549 | 0.0000000000  | -1.8141820702 |
| H | 5.1323799444  | 0.8835425979  | 2.2032089511  |
| H | 5.1323799444  | -0.8835425979 | 2.2032089511  |
| H | 7.2909183905  | 0.0000000000  | 1.2454662774  |
| H | 6.3832018756  | -0.8867073918 | 0.0052796159  |
| H | 6.3832018756  | 0.8867073918  | 0.0052796159  |
| O | -5.0180928665 | 0.0000000000  | -2.4818296285 |
| O | -5.8064586611 | 0.0000000000  | -0.4477612537 |

**Lowest vibrational frequencies:**

|                | 1       | 2       | 3        |
|----------------|---------|---------|----------|
|                | A''     | A''     | A'       |
| Frequencies -- | 63.6055 | 95.5032 | 100.7345 |
| Red. masses -- | 5.9222  | 6.4012  | 5.1735   |
| Frc consts --  | 0.0141  | 0.0344  | 0.0309   |
| IR Inten --    | 0.1246  | 6.3174  | 0.0364   |

## Theoretical Calculations of compound 5a

S194

### Compound 5a

|                                               |                             |
|-----------------------------------------------|-----------------------------|
| Zero-point correction =                       | 0.140903 (Hartree/Particle) |
| Thermal correction to Energy =                | 0.149419                    |
| Thermal correction to Enthalpy =              | 0.150363                    |
| Thermal correction to Gibbs Free Energy =     | 0.106715                    |
| Sum of electronic and zero-point Energies =   | -490.910519                 |
| Sum of electronic and thermal Energies =      | -490.902003                 |
| Sum of electronic and thermal Enthalpies =    | -490.901058                 |
| Sum of electronic and thermal Free Energies = | -490.944706                 |

| Coord: | X             | Y            | Z             |
|--------|---------------|--------------|---------------|
| C      | 0.9574415934  | 0.0000000000 | -1.1508158615 |
| C      | 0.7874789495  | 0.0000000000 | 0.2510327478  |
| C      | 1.9397365316  | 0.0000000000 | 1.0672405934  |
| C      | 3.2135673669  | 0.0000000000 | 0.5109427810  |
| C      | 3.3637085500  | 0.0000000000 | -0.8771933279 |
| C      | 2.2340168253  | 0.0000000000 | -1.7009577472 |
| C      | -0.4942377394 | 0.0000000000 | 0.9350439342  |
| C      | -1.7758577573 | 0.0000000000 | 0.4603155817  |
| C      | -2.1488898836 | 0.0000000000 | -0.9222049947 |
| N      | -2.4737756050 | 0.0000000000 | -2.0398171691 |

|   |               |              |               |
|---|---------------|--------------|---------------|
| C | -2.8670805170 | 0.0000000000 | 1.392052      |
| H | -0.4228963099 | 0.0000000000 | 2.0201258729  |
| H | 1.8230028923  | 0.0000000000 | 2.147487265   |
| H | 4.0862365710  | 0.0000000000 | 1.1562968158  |
| H | 4.3564852856  | 0.0000000000 | -1.3168797903 |
| H | 2.3493705758  | 0.0000000000 | -2.7802278242 |
| H | 0.0982471164  | 0.0000000000 | -1.8088624085 |
| N | -3.7476172017 | 0.0000000000 | 2.1525780018  |

**Lowest vibrational frequencies:**

|                | 1       | 2        | 3        |
|----------------|---------|----------|----------|
|                | A''     | A''      | A'       |
| Frequencies -- | 99.5868 | 142.3865 | 168.3196 |
| Red. masses -- | 4.9416  | 5.6946   | 7.4484   |
| Frc consts --  | 0.0289  | 0.0680   | 0.1243   |
| IR Inten --    | 0.5799  | 1.3376   | 2.4481   |

## Theoretical Calculations of compound 5b

S196

### Compound 5b

|                                               |                             |
|-----------------------------------------------|-----------------------------|
| Zero-point correction =                       | 0.175866 (Hartree/Particle) |
| Thermal correction to Energy =                | 0.186494                    |
| Thermal correction to Enthalpy =              | 0.187438                    |
| Thermal correction to Gibbs Free Energy =     | 0.139216                    |
| Sum of electronic and zero-point Energies =   | -604.761341                 |
| Sum of electronic and thermal Energies =      | -604.750714                 |
| Sum of electronic and thermal Enthalpies =    | -604.749769                 |
| Sum of electronic and thermal Free Energies = | -604.797992                 |

| Coord: | X             | Y            | Z             |
|--------|---------------|--------------|---------------|
| C      | 1.3424898972  | 0.0000000000 | -1.4271708827 |
| C      | 0.1107391225  | 0.0000000000 | -0.7867456582 |
| C      | 0.0174801706  | 0.0000000000 | 0.6215040465  |
| C      | 1.2278708670  | 0.0000000000 | 1.3580431428  |
| C      | 2.4583319711  | 0.0000000000 | 0.7316854882  |
| C      | 2.5281321035  | 0.0000000000 | -0.6728384421 |
| C      | -1.2143907155 | 0.0000000000 | 1.3769582477  |
| C      | -2.5266579863 | 0.0000000000 | 0.9821045115  |
| C      | -3.5577087154 | 0.0000000000 | 1.9780295278  |

|   |               |               |               |
|---|---------------|---------------|---------------|
| N | -4.3897098097 | 0.0000000000  | 2.7919743897  |
| C | -2.9774102951 | 0.0000000000  | -0.3756300544 |
| N | -3.3558267166 | 0.0000000000  | -1.4768166494 |
| H | -1.0782620454 | 0.0000000000  | 2.4560134642  |
| H | 1.1858021112  | 0.0000000000  | 2.4437662807  |
| H | 3.3832738174  | 0.0000000000  | 1.2976480346  |
| O | 3.7737035916  | 0.0000000000  | -1.1985750444 |
| H | 1.3726897083  | 0.0000000000  | -2.509661376  |
| H | -0.7849738103 | 0.0000000000  | -1.3945190858 |
| C | 3.9238387401  | 0.0000000000  | -2.6161498491 |
| H | 4.9982292747  | 0.0000000000  | -2.7997105372 |
| H | 3.4780384686  | -0.8950625085 | -3.0648905377 |
| H | 3.4780384686  | 0.8950625085  | -3.0648905377 |

**Lowest vibrational frequencies:**

|                | 1       | 2        | 3        |
|----------------|---------|----------|----------|
|                | A''     | A''      | A'       |
| Frequencies -- | 94.0386 | 108.0116 | 138.4662 |
| Red. masses -- | 6.2006  | 4.8056   | 6.8051   |
| Frc consts --  | 0.0323  | 0.0330   | 0.0769   |
| IR Inten --    | 0.0196  | 1.1698   | 2.8228   |

## Theoretical Calculations of compound 5c

S198

### Compound 5c

|                                               |                             |
|-----------------------------------------------|-----------------------------|
| Zero-point correction =                       | 0.130793 (Hartree/Particle) |
| Thermal correction to Energy =                | 0.140490                    |
| Thermal correction to Enthalpy =              | 0.141434                    |
| Thermal correction to Gibbs Free Energy =     | 0.094617                    |
| Sum of electronic and zero-point Energies =   | -949.816570                 |
| Sum of electronic and thermal Energies =      | -949.806874                 |
| Sum of electronic and thermal Enthalpies =    | -949.805929                 |
| Sum of electronic and thermal Free Energies = | -949.852747                 |

| Coord: | X             | Y            | Z             |
|--------|---------------|--------------|---------------|
| C      | 1.3969418696  | 0.0000000000 | -1.4412100431 |
| C      | 0.1261412796  | 0.0000000000 | -0.8819508506 |
| C      | -0.0456056609 | 0.0000000000 | 0.5196480897  |
| C      | 1.1098176249  | 0.0000000000 | 1.3306888498  |
| C      | 2.3845868537  | 0.0000000000 | 0.7807267225  |
| C      | 2.5196738603  | 0.0000000000 | -0.6085142619 |

|    |               |              |               |
|----|---------------|--------------|---------------|
| C  | -1.3254956096 | 0.0000000000 | 1.2050947946  |
| C  | -2.6067576880 | 0.0000000000 | 0.7295223837  |
| C  | -3.6991021205 | 0.0000000000 | 1.6596665590  |
| N  | -4.5806800806 | 0.0000000000 | 2.4188978638  |
| C  | -2.9754901629 | 0.0000000000 | -0.6539611466 |
| N  | -3.2920973058 | 0.0000000000 | -1.7739447325 |
| H  | -1.2533244962 | 0.0000000000 | 2.2899440135  |
| H  | 1.0011976915  | 0.0000000000 | 2.4114780316  |
| H  | 3.2638282396  | 0.0000000000 | 1.4143421370  |
| Cl | 4.1175289827  | 0.0000000000 | -1.3180932498 |
| H  | 1.5220153172  | 0.0000000000 | -2.5178268119 |
| H  | -0.7305292305 | 0.0000000000 | -1.5432906258 |

### Lowest vibrational frequencies:

|                | 1       | 2        | 3        |
|----------------|---------|----------|----------|
|                | A''     | A''      | A'       |
| Frequencies -- | 87.1098 | 102.4316 | 137.2402 |
| Red. masses -- | 10.2689 | 5.2291   | 11.5387  |
| Frc consts --  | 0.0459  | 0.0323   | 0.1280   |
| IR Inten --    | 2.6905  | 0.2281   | 3.1422   |



## Theoretical Calculations of compound 5d

S200

### Compound 5d

|                                               |                             |
|-----------------------------------------------|-----------------------------|
| Zero-point correction =                       | 0.143976 (Hartree/Particle) |
| Thermal correction to Energy =                | 0.154564                    |
| Thermal correction to Enthalpy =              | 0.155508                    |
| Thermal correction to Gibbs Free Energy =     | 0.106999                    |
| Sum of electronic and zero-point Energies =   | -694.365412                 |
| Sum of electronic and thermal Energies =      | -694.354825                 |
| Sum of electronic and thermal Enthalpies =    | -694.353880                 |
| Sum of electronic and thermal Free Energies = | -694.402390                 |

| Coord: | X             | Y            | Z             |
|--------|---------------|--------------|---------------|
| C      | 1.1051061596  | 0.0000000000 | -1.3783073320 |
| C      | -0.1551974414 | 0.0000000000 | -0.7953988677 |
| C      | -0.2946315251 | 0.0000000000 | 0.6099560480  |
| C      | 0.8727072018  | 0.0000000000 | 1.4049942139  |
| C      | 2.1367511629  | 0.0000000000 | 0.8316844125  |
| C      | 2.2315665828  | 0.0000000000 | -0.5572979364 |
| C      | -1.5646636883 | 0.0000000000 | 1.3230979597  |
| C      | -2.8514942407 | 0.0000000000 | 0.8692089005  |
| C      | -3.9285706624 | 0.0000000000 | 1.8180639550  |
| N      | -4.7976125504 | 0.0000000000 | 2.5911307238  |

|   |               |              |               |
|---|---------------|--------------|---------------|
| C | -3.2469943509 | 0.0000000000 | -0.5076089980 |
| N | -3.5879908974 | 0.0000000000 | -1.6200504470 |
| H | -1.4716973051 | 0.0000000000 | 2.4060629952  |
| H | 0.7801185418  | 0.0000000000 | 2.4867763148  |
| H | 3.0382669257  | 0.0000000000 | 1.4306719518  |
| N | 3.5696897774  | 0.0000000000 | -1.1795063638 |
| H | 1.2298878601  | 0.0000000000 | -2.4536203159 |
| H | -1.0257933689 | 0.0000000000 | -1.4375288118 |
| O | 3.6237203433  | 0.0000000000 | -2.4073429742 |
| O | 4.5429218878  | 0.0000000000 | -0.4281237332 |

**Lowest vibrational frequencies:**

|                | 1       | 2        | 3        |
|----------------|---------|----------|----------|
|                | A''     | A''      | A'       |
| Frequencies -- | 91.6826 | 100.2444 | 140.7107 |
| Red. masses -- | 8.2829  | 5.6125   | 10.6111  |
| Frc consts --  | 0.0410  | 0.0332   | 0.1238   |
| IR Inten --    | 6.4915  | 0.0023   | 4.9602   |

## Theoretical Calculations of compound 6a

S202

### Compound 6a

|                                               |                             |
|-----------------------------------------------|-----------------------------|
| Zero-point correction =                       | 0.294131 (Hartree/Particle) |
| Thermal correction to Energy =                | 0.309696                    |
| Thermal correction to Enthalpy =              | 0.310640                    |
| Thermal correction to Gibbs Free Energy =     | 0.251701                    |
| Sum of electronic and zero-point Energies =   | -838.662486                 |
| Sum of electronic and thermal Energies =      | -838.646921                 |
| Sum of electronic and thermal Enthalpies =    | -838.645977                 |
| Sum of electronic and thermal Free Energies = | -838.704916                 |

| Coor: | X             | Y             | Z             |
|-------|---------------|---------------|---------------|
| C     | -1.4396898091 | 1.7476451155  | -1.7904227069 |
| C     | -1.1927936613 | 1.5762668057  | -0.4217165978 |
| C     | -2.2451100869 | 1.7476450587  | 0.4876481686  |
| C     | -3.5258938389 | 2.0607624043  | 0.0326953418  |
| C     | -3.7695308571 | 2.2160983722  | -1.3327314289 |
| C     | -2.7218105044 | 2.0607624571  | -2.2415940931 |
| C     | 0.1858900362  | 1.3244865658  | 0.0657220537  |
| C     | 0.8446078358  | 0.1687777267  | 0.2986140681  |
| C     | 0.2712651563  | -1.2068330217 | 0.0959065501  |
| O     | -1.0013354068 | -1.1521542679 | -0.354025609  |

|   |               |               |               |
|---|---------------|---------------|---------------|
| C | 2.2618569761  | 0.3585984858  | 0.7996877016  |
| O | 2.7527317152  | 1.4600255635  | 0.9732381986  |
| O | 2.9224762632  | -0.7795595647 | 1.0332520678  |
| C | 4.2796353199  | -0.6322316829 | 1.5130805928  |
| C | 4.8383869001  | -2.0277545448 | 1.710629296   |
| O | 0.8488014087  | -2.2534195077 | 0.3000964575  |
| H | 0.7772290263  | 2.2170456077  | 0.2747921649  |
| H | -0.6270453072 | 1.6286866632  | -2.5007778772 |
| H | -2.9002032679 | 2.1855232462  | -3.3057715621 |
| H | -4.7666773464 | 2.4623276876  | -1.6852762060 |
| H | -4.3335215254 | 2.1855231563  | 0.7482616865  |
| H | -2.0595399302 | 1.6286865620  | 1.5509257712  |
| H | 4.8521148151  | -0.0556441246 | 0.7797717030  |
| H | 4.2639832442  | -0.0556440761 | 2.4432578108  |
| H | 5.8685977435  | -1.9655161077 | 2.0748641618  |
| H | 4.2448376768  | -2.5850892722 | 2.4401569019  |
| H | 4.8352748495  | -2.5850892912 | 0.7701498959  |
| C | -1.6435693385 | -2.4268286372 | -0.5810896979 |
| C | -3.0479982553 | -2.1423102369 | -1.0776301007 |
| H | -1.0544818472 | -2.9948094239 | -1.3081375257 |
| H | -1.6423681087 | -2.9948096707 | 0.3546564720  |
| H | -3.5731353124 | -3.0844503727 | -1.2632943444 |
| H | -3.6139247300 | -1.5681940515 | -0.3391616921 |
| H | -3.0240070579 | -1.5681935298 | -2.0077011661 |

**Lowest vibrational frequencies:**

|                | 1       | 2       | 3        |
|----------------|---------|---------|----------|
|                | A       | A       | A        |
| Frequencies -- | 76.7902 | 91.1962 | 102.3364 |
| Red. masses -- | 4.9386  | 4.7599  | 4.0047   |
| Frc consts --  | 0.0172  | 0.0233  | 0.0247   |
| IR Inten --    | 2.5611  | 0.0142  | 0.3599   |

## Theoretical Calculations of compound 6b

S205

### Compound 6b

|                                               |                             |
|-----------------------------------------------|-----------------------------|
| Zero-point correction =                       | 0.329858 (Hartree/Particle) |
| Thermal correction to Energy =                | 0.347448                    |
| Thermal correction to Enthalpy =              | 0.348392                    |
| Thermal correction to Gibbs Free Energy =     | 0.285101                    |
| Sum of electronic and zero-point Energies =   | -952.521384                 |
| Sum of electronic and thermal Energies =      | -952.503795                 |
| Sum of electronic and thermal Enthalpies =    | -952.502850                 |
| Sum of electronic and thermal Free Energies = | -952.566141                 |

| Coord: | X             | Y             | Z             |
|--------|---------------|---------------|---------------|
| C      | -2.4181311551 | 1.5399317624  | -2.0379230401 |
| C      | -1.3000341064 | 1.0318371147  | -1.3825161909 |
| C      | -0.8307428209 | 1.6062794069  | -0.1856817117 |
| C      | -1.5222459572 | 2.7366057401  | 0.3091447518  |
| C      | -2.6405370741 | 3.2438277712  | -0.3276418410 |
| C      | -3.1022476658 | 2.6444850841  | -1.5103777317 |
| C      | 0.3231627699  | 1.1519338313  | 0.5797036402  |
| C      | 1.0269216345  | -0.0066608410 | 0.6037536169  |
| C      | 2.1707257715  | -0.0668802797 | 1.5601173186  |
| O      | 2.9280404712  | -1.1695556748 | 1.3633067872  |
| C      | 4.0801040226  | -1.3036625235 | 2.2249184655  |

|   |               |               |               |
|---|---------------|---------------|---------------|
| C | 4.7760252212  | -2.5992662127 | 1.8555463228  |
| C | 0.7471883842  | -1.2224164595 | -0.2266987336 |
| O | 0.7886292665  | -1.2807974219 | -1.4406516688 |
| O | 0.4222145781  | -2.2707432626 | 0.5533716547  |
| C | 0.1940447071  | -3.5243232970 | -0.1322705839 |
| C | -0.1572843712 | -4.5587175964 | 0.9190272031  |
| O | 2.4313369883  | 0.7793597571  | 2.3947484856  |
| H | 0.6762097430  | 1.8707767816  | 1.3182611096  |
| H | -0.7673026097 | 0.1993444737  | -1.8237831609 |
| H | -2.7408656712 | 1.0765737579  | -2.9625709081 |
| O | -4.2038880265 | 3.2120260924  | -2.0691059037 |
| H | -3.1731099759 | 4.1048032467  | 0.0617390718  |
| H | -1.1716934440 | 3.2108552741  | 1.2217711275  |
| H | 4.7285757247  | -0.4330958648 | 2.0847741767  |
| H | 3.7446323378  | -1.2981490341 | 3.2666442040  |
| H | 5.6608548832  | -2.7375854680 | 2.4845278008  |
| H | 4.1115747936  | -3.4553755850 | 2.0033672696  |
| H | 5.0954176840  | -2.5872228495 | 0.8096470479  |
| H | -0.6105108013 | -3.3872567301 | -0.8614408069 |
| H | 1.0994120949  | -3.7899551251 | -0.6870498221 |
| H | -0.3368268326 | -5.5271047593 | 0.4417945655  |

|   |               |               |               |
|---|---------------|---------------|---------------|
| H | 0.6569962330  | -4.6748488437 | 1.6397095547  |
| H | -1.0603616393 | -4.2706310652 | 1.4644112519  |
| C | -4.7195750612 | 2.6541176993  | -3.2706434899 |
| H | -5.5940572552 | 3.2531294146  | -3.5271691156 |
| H | -3.9897190963 | 2.7112147322  | -4.0873828608 |
| H | -5.0241381829 | 1.6096645217  | -3.1313533217 |

**Lowest vibrational frequencies:**

|                | 1       | 2       | 3       |
|----------------|---------|---------|---------|
|                | A       | A       | A       |
| Frequencies -- | 63.7983 | 73.3266 | 94.6687 |
| Red. masses -- | 4.7262  | 3.8914  | 4.2212  |
| Frc consts --  | 0.0113  | 0.0123  | 0.0223  |
| IR Inten --    | 1.0028  | 0.2669  | 0.5932  |



## Theoretical Calculations of compound 6c

S208

### Compound 6c

|                                               |                             |
|-----------------------------------------------|-----------------------------|
| Zero-point correction =                       | 0.284811 (Hartree/Particle) |
| Thermal correction to Energy =                | 0.301493                    |
| Thermal correction to Enthalpy =              | 0.302437                    |
| Thermal correction to Gibbs Free Energy =     | 0.240456                    |
| Sum of electronic and zero-point Energies =   | -1297.580218                |
| Sum of electronic and thermal Energies =      | -1297.563536                |
| Sum of electronic and thermal Enthalpies =    | -1297.562592                |
| Sum of electronic and thermal Free Energies = | -1297.624573                |

| Coord: | X             | Y             | Z             |
|--------|---------------|---------------|---------------|
| C      | -2.4520858271 | 3.1118424003  | 1.2251572178  |
| C      | -1.2487259198 | 2.7510984960  | 0.6297635536  |
| C      | -1.0309532649 | 1.4515511355  | 0.1291326514  |
| C      | -2.0898485710 | 0.5249556056  | 0.2096664750  |
| C      | -3.3023000660 | 0.8786278071  | 0.7933190648  |
| C      | -3.4731415252 | 2.1654321917  | 1.3050985936  |
| C      | 0.2800050498  | 1.1820575520  | -0.4616548372 |
| C      | 0.9574014850  | 0.0359683644  | -0.6973941287 |
| C      | 2.3066980151  | 0.1764323353  | -1.3272947660 |
| O      | 2.8101155811  | -1.0219411851 | -1.6894285428 |

|    |               |               |               |
|----|---------------|---------------|---------------|
| C  | 4.1038954728  | -0.9942965583 | -2.3365945053 |
| C  | 4.4902667792  | -2.4279382129 | -2.6425230831 |
| C  | 0.4849816569  | -1.3513177065 | -0.3717531279 |
| O  | 1.2601648644  | -1.9076424567 | 0.5746048440  |
| C  | 0.9438170993  | -3.2761592511 | 0.9313028545  |
| C  | 1.9349131999  | -3.7082202727 | 1.9936863871  |
| O  | -0.4680288022 | -1.9103269396 | -0.8779991878 |
| O  | 2.8757770912  | 1.2322294762  | -1.5261412937 |
| H  | 0.8455091266  | 2.0744780766  | -0.7264465712 |
| H  | -0.4521529475 | 3.4864844311  | 0.5601529500  |
| H  | -2.6020282284 | 4.1117408327  | 1.6159880043  |
| Cl | -5.0030232856 | 2.6062263969  | 2.0447891749  |
| H  | -4.1159416696 | 0.1637742240  | 0.8435930308  |
| H  | -1.9748586187 | -0.4647061659 | -0.2136321787 |
| H  | 4.0297769894  | -0.3841846631 | -3.2420966234 |
| H  | 4.8200500018  | -0.5063054534 | -1.6684919115 |

|   |               |               |               |
|---|---------------|---------------|---------------|
| H | 5.4650728381  | -2.4503147353 | -3.1392277853 |
| H | 4.5583584099  | -3.0187825929 | -1.7247187017 |
| H | 3.7564991793  | -2.8985271975 | -3.3028359200 |
| H | -0.0895183756 | -3.3161756768 | 1.2890914487  |
| H | 1.0060600465  | -3.8942337836 | 0.0304341935  |
| H | 1.7298796508  | -4.7406327303 | 2.2930690916  |
| H | 2.9598757631  | -3.6555896528 | 1.6161968963  |
| H | 1.8610423078  | -3.0716281362 | 2.8797474493  |

**Lowest vibrational frequencies:**

|                | 1       | 2       | 3       |
|----------------|---------|---------|---------|
|                | A       | A       | A       |
| Frequencies -- | 60.6230 | 72.0145 | 91.2721 |
| Red. masses -- | 6.1833  | 4.2511  | 4.7923  |
| Frc consts --  | 0.0134  | 0.0130  | 0.0235  |
| IR Inten --    | 0.2266  | 0.1489  | 0.4212  |

## Theoretical Calculations of compound 6d

S211

### Compound 6d

|                                               |                             |
|-----------------------------------------------|-----------------------------|
| Zero-point correction =                       | 0.297297 (Hartree/Particle) |
| Thermal correction to Energy =                | 0.314903                    |
| Thermal correction to Enthalpy =              | 0.315847                    |
| Thermal correction to Gibbs Free Energy =     | 0.252276                    |
| Sum of electronic and zero-point Energies =   | -1042.124171                |
| Sum of electronic and thermal Energies =      | -1042.106565                |
| Sum of electronic and thermal Enthalpies =    | -1042.105621                |
| Sum of electronic and thermal Free Energies = | -1042.169191                |

| Coord: | X             | Y             | Z             |
|--------|---------------|---------------|---------------|
| C      | -0.5300652914 | 1.2112112502  | 2.0862635567  |
| C      | -0.0102455966 | -0.0001110307 | 1.6052803240  |
| C      | -0.5308762797 | -1.2113108081 | 2.0856951669  |
| C      | -1.5682880269 | -1.2176135373 | 3.0110645333  |
| C      | -2.0733988331 | 0.0001445864  | 3.4608757576  |
| C      | -1.5674777304 | 1.2177755378  | 3.0116294148  |
| C      | 1.1586207639  | -0.0002812730 | 0.6928613536  |
| C      | 1.1917178030  | -0.0001720916 | -0.6560649553 |
| C      | -0.0990937937 | 0.0001965973  | -1.4310326939 |
| O      | -1.1880444270 | 0.0007866534  | -0.8888863943 |

|   |               |               |               |
|---|---------------|---------------|---------------|
| C | 2.5895915272  | -0.0004376588 | -1.2391546657 |
| O | 3.5854230895  | -0.0009413061 | -0.5382495305 |
| O | 2.6400092333  | 0.0003093449  | -2.5761310789 |
| C | 3.9711712520  | 0.0002914762  | -3.1502056463 |
| C | 3.8135237617  | 0.0011424054  | -4.6576183623 |
| O | 0.0537769416  | -0.0004813572 | -2.7632810324 |
| C | -1.1749416848 | -0.0003145325 | -3.5311880928 |
| C | -0.7909567115 | -0.0011917064 | -4.9975745322 |
| H | 2.1366237640  | -0.0005574020 | 1.1743587209  |
| H | -0.1255740019 | 2.1511999983  | 1.7258747886  |
| H | -1.9876867643 | 2.1413883048  | 3.3887908182  |
| N | -3.1667320352 | 0.0002783355  | 4.4425749929  |
| H | -1.9891084009 | -2.1411209555 | 3.3878026090  |
| H | -0.1270132396 | -2.1514007748 | 1.7248659206  |
| H | 4.5084999339  | 0.8820940584  | -2.7884948249 |
| H | 4.5080614361  | -0.8821672655 | -2.7894451693 |
| H | 4.8000104327  | 0.0011412465  | -5.1312245842 |
| H | 3.2695447149  | -0.8853766601 | -4.9950242856 |
| H | 3.2700060288  | 0.8883058137  | -4.9940743467 |
| H | -1.7616780840 | -0.8818675903 | -3.2555924281 |
| H | -1.7609024535 | 0.8820194522  | -3.2564430406 |
| H | -1.6940223973 | -0.0010881189 | -5.6155737843 |

|   |               |               |               |
|---|---------------|---------------|---------------|
| H | -0.2017801132 | 0.8851992724  | -5.2483193215 |
| H | -0.2025707604 | -0.8883492412 | -5.2474646670 |
| O | -3.5922017360 | 1.0903313200  | 4.8257895911  |
| O | -3.5928347019 | -1.0896726270 | 4.8253774068  |

**Lowest vibrational frequencies:**

|                | 1       | 2       | 3        |
|----------------|---------|---------|----------|
|                | A       | A       | A        |
| Frequencies -- | 68.5457 | 73.1474 | 102.2378 |
| Red. masses -- | 7.3793  | 4.9678  | 4.0324   |
| Frc consts --  | 0.0204  | 0.0157  | 0.0248   |
| IR Inten --    | 0.5598  | 0.2415  | 0.6242   |
